# Supplementary material for: A Proteomics-Based Analysis Reveals Predictive Biological Patterns in Fabry Disease
Source: J Clin Med. 2020 May 2;9(5):1325. doi: 10.3390/jcm9051325 (PMC7290805; doi:10.3390/jcm9051325)
Supplement: Supplementary file 1 [file jcm-09-01325-s001.zip › Tebani_et_al_fabomics_supplementray_data.xlsx]

## Sheet: Content_Summary
Table_S1	Clinical and proteomic data
Table_S2	Summary statistics of the clinical characteristic of the cohort
Table_S3	Correlation results of the proteomic data
Table_S4	Results of differential analysis statistics
Table_S5	Results of the ANOVA analysis

## Sheet: Table_S1
sample	Age	Weight	Height	BMI	Sex	Group	Treatment	Phenotype	Therapy	Treatment_cumul_years	Neutralizing_Antibodies	variant	variant_cDNA	variant_Protein	variant_effect	Exon	lysoGb3	Residual_Enzyme_Activity	Creatinine	Creat_MDRD	eGFR_45	Hemoglobin	Leucocytes	Lymphocytes	Neutrophiles	Platelet	Mainz_Total_Score	Mainz_Cardiovascular_Score	Mainz_General_Score	Mainz_Neurological_Score	Mainz_Renal_Score	Cornea_verticilata	CKD_stages	Kidney_Transp	Dialysis	Hypertrophic_cardiomyopathy	Angiokeratoma	Arterial_thrombosis	Venous_thrombosis	Card_score	Arrhythmia	Stroke_ischemic	Mainz_stroke	Neuropathic_pain	Sudation_disorder	FGF2	IL7	VEGFA	VEGFC
F280	51.7	77			Female	Fabry	Non_Treated	Classic	Non Treated		Positive	c802-3_802-2del	c.802-3_802-2del	p.?	mtp	0	49.3		55	106.651	eGFR>45	13.3	6.7	1.67	4.65	294	26	11	6	9	0	cornvert	0	noKidneyTransp	0	cardiop	angiok	0	1	2	arryhthmia	stroke	5	Pain	sudationtrbl	136.1	30	420.24	99.9
F286	45.3	81			Male	Fabry	Treated	Non_Classic	Agalsidase alfa / Agalsidase beta	15.3539	Positive	R220X	c.658C>T	p.Arg220*	mtp	5	7.1	1	82	93.0839	eGFR>45	14.9	7.3	3.1	3.5	263	14	2	4	8	0	nocornvert	0	noKidneyTransp	0	cardiop	angiok	0	0	0	arryhthmia	nostroke	3	Pain	sudationtrbl	180.617	23.794	193.382	486.563
F250	54.6	48	150	21.3	Female	Fabry	Treated	Classic	Agalsidase alfa	2.54894	Positive	c.1021delG	c.1021del	p.Glu341Asnfs*7	mtp	7	13.4	1.19			eGFR>45						37	11	4	4	18	cornvert	5	noKidneyTransp	1	cardiop	angiok	0	0	1	arryhthmia	nostroke	0	Pain	nosudationtrbl	264.371	21.8821	126.824	458.091
F305	44.5	45	166	16.3	Male	Fabry	Treated	Classic	Agalsidase alfa	3.83573	Positive						25.8	0.73	81	5	eGFR<45	15.8	6			196	52	11	10	13	18	cornvert	1	KidneyTransp	1	cardiop	angiok	0	0	0	noarryhthmia	stroke	5	Pain	sudationtrbl	134.883	43.0174	176.73	289.603
F236	48.1	75	174	24.8	Male	Fabry	Treated	Non_Classic	Agalsidase alfa / Agalsidase beta	13.4209	Positive	R112C	c.334C>T	p.Arg112Cys	missense	2	24.6	1.27	71	108.91	eGFR>45	13.7	5.54	1.96	2.46	188	21	6	7	8	0	nocornvert	0	noKidneyTransp	0	cardiop	angiok	0	0	2	arryhthmia	nostroke	0	Pain	sudationtrbl	149.196	38.2987	295.686	803.523
F289	45.1	76			Female	Fabry	Treated	Non_Classic	Agalsidase alfa	-0.0438056	Positive	K168N	c.504A>C	p.Lys168Asn	missense	3	2	1.19	55	109.496	eGFR>45	13.5				257	7	0	1	6	0	cornvert		noKidneyTransp	0	nocardiop	noangiok	0	0	0	noarryhthmia	stroke	5	noPain	nosudationtrbl	186.862	24.3427	233.201	538.469
F272	75.4	46			Female	Fabry	Treated	Classic	Agalsidase beta	13.4593	Positive	S78X	c.233C>G	p.Ser78*	mtp	2	3.4	1.11	344	11.9349	eGFR<45	7.5	8.6			260	36	18	4	2	12	cornvert	5	noKidneyTransp	0	cardiop	angiok	0	1	3	arryhthmia	nostroke	0		nosudationtrbl	39.3656	18.4524	23.0358	540.631
F224	54.8	80	164	29.7	Female	Fabry	Non_Treated	Non_Classic	Non Treated		Positive	c802-3_802-2del	c.802-3_802-2del	p.?	mtp	0	8.7		86	62.7841	eGFR>45	14.2	5.9	1.96	3.36	207	11	3	0	0	8	nocornvert	2	noKidneyTransp	0	nocardiop	noangiok	0	0	0	noarryhthmia	nostroke	0	Pain	sudationtrbl	264.863	34.9642	186.3	664.144
F231	48	74	167	26.5	Female	Fabry	Treated	Classic	Agalsidase alfa	11.8741	Positive	M42R	c.125T>G	p.Met42Arg	missense	1		0.87	50	121.135	eGFR>45	12.6	12	1.63	9.22	242	13	0	4	9	0	cornvert	0	noKidneyTransp	0	nocardiop	noangiok	0	0	2	arryhthmia	nostroke	0	Pain	sudationtrbl	208	72.97	131	188.7
F232	16.7	53	165	19.5	Female	Fabry	Non_Treated	Non_Classic	Non Treated		Positive	c.802-3_802-2del	c.802-3_802-2del	p.?	mtp	0	1.9	1.07	76	91.6443	eGFR>45	15.4	6.8	2.4	3.7	274	0	0	0	0	0		0	noKidneyTransp	0	nocardiop	noangiok	0	0	0	noarryhthmia	nostroke	0	noPain	nosudationtrbl	208.4	77.58	190.03	309.9
F284	33.4	80	176	25.8	Male	Fabry	Treated	Non_Classic	Agalsidase beta	13.306	Negative	Q283X	c.847C>T	p.Gln283*	mtp	6	48	0.32	72	114.652	eGFR>45	13.7	4.75	2.32	1.87	241	14	9	2	3	0	nocornvert	0	noKidneyTransp	0	cardiop	noangiok	0	0	1	noarryhthmia	nostroke	0	Pain	sudationtrbl	98.451	19.1427	399.725	542.72
F306	49	56			Female	Fabry	Treated	Non_Classic	Agalsidase alfa / Agalsidase beta	5.0924	Positive	R227Q	c.680G>A	p.Arg227Gln	missense	5	4.9	0.86	70	81.3149	eGFR>45						22	9	0	5	8	nocornvert	2	noKidneyTransp	0	cardiop	noangiok	0	0	0	arryhthmia	stroke	5	Pain	nosudationtrbl	170.599	25.9778	92.3118	205.897
F267	44.4	68	170	23.5	Male	Fabry	Treated	Classic	Agalsidase alfa / Agalsidase beta	14.8611	Positive						10.1	0.95	64	124.366	eGFR>45	14.8	6.2			250	7	2	1	0	4		1	noKidneyTransp	0	nocardiop	angiok	0	0	0	arryhthmia	nostroke	0	Pain	sudationtrbl	58.0517	38.5291	416.221	379.935
F294	35	74			Male	Fabry	Non_Treated	Non_Classic	Non Treated		Positive	F113L	c.337T>C	p.Phe113Leu	missense	2	3	1.17	63	132.119	eGFR>45	13.4	9.2	2.4	5.8	184	0	0	0	0	0	nocornvert	0	noKidneyTransp	0	nocardiop	noangiok	0	0	0	noarryhthmia	nostroke	0	noPain	nosudationtrbl	7.84842	10.5411	124.333	247.411
F254	60.9	82	177	26.2	Male	Fabry	Treated	Non_Classic	Agalsidase beta	4.83504	Positive	F337S	c.1010T>C	p.Phe337Ser	missense	7	5.8	1.01	118	57.648	eGFR>45	16.5	8.98	3.26	4.56	276	20	7	2	3	8	nocornvert	3	noKidneyTransp	0	cardiop	noangiok	0	0	2	arryhthmia	nostroke	0	Pain	nosudationtrbl	232.749	29.2984	249.809	589.473
F275	66.3	89			Female	Fabry	Treated	Non_Classic	Agalsidase beta	12.334	Positive						2.3	1.08	57	97.4681	eGFR>45	14.2	9.37	3.4	5	291	14	12	2	0	0	nocornvert	0	noKidneyTransp	0	cardiop	noangiok	1	0	1	noarryhthmia	nostroke	0	Pain	sudationtrbl	229.706	35.2356	326.934	759.958
F297	72.7	70			Male	Fabry	Treated	Non_Classic	Agalsidase beta	0	Positive	N215S	c.644A>G	p.Asn215Ser	missense	5		1.1	124	52.4361	eGFR>45	11.8	6.55	1.9	3.9	240	23	13	2	0	8		3	noKidneyTransp	0	cardiop	noangiok	0	0	3	arryhthmia	nostroke	0	noPain	nosudationtrbl	314.882	27.6668	129.574	606.786
F274	26.5	49	169	17.2	Female	Fabry	Non_Treated	Classic	Non Treated		Positive	R301X	c.901C>T	p.Arg301*	mtp	6	5.3		63	103.691	eGFR>45	12.4	4.4	1.65	2.35	305	13	2	5	6	0	cornvert	0	noKidneyTransp	0	nocardiop	angiok	0	0	0	noarryhthmia	nostroke	3	Pain	nosudationtrbl	48.4195	44.9212	141.933	1350.38
F269	38.4	82			Female	Fabry	Non_Treated	Non_Classic	Non Treated		Positive	I219L	c.655A>C	p.Ile219Leu	missense	5	2.05		49	129.184	eGFR>45	12.8	6.64	3	3	336	6	1	0	1	4	nocornvert	1	noKidneyTransp	0	nocardiop	noangiok	0	0	0	noarryhthmia	nostroke	0	noPain	nosudationtrbl	81.2	38.77	599.04	168.2
F303	61.6	75	160	29.3	Female	Fabry	Treated	Classic	Agalsidase beta	3.15948	Positive	R342X	c.1024C>T	p.Arg342*	mtp		7	1.21	77	69.8596	eGFR>45	13.9	7.3			214	28	16	4	0	8	cornvert	2	noKidneyTransp	0	cardiop	noangiok	0	0	3	arryhthmia		0		nosudationtrbl	63.4522	20.121	94.697	457.015
F295	37.9	106	170	36.7	Female	Fabry	Non_Treated	Classic	Non Treated		Positive	F295C	c.884T>G	p.Phe295Cys	missense	6	4.5	1.23	65	93.6537	eGFR>45	15	7.56		4.42	233	8	0	5	3	0	cornvert	0	noKidneyTransp	0	nocardiop	angiok	0	1	0	noarryhthmia	nostroke	0	Pain	nosudationtrbl	202.9	51.82	549.61	252.4
F256	52.1	71			Male	Fabry	Treated	Non_Classic	Agalsidase alfa / Agalsidase beta / Miglastat	8.49281	Positive	N215S	c.644A>G	p.Asn215Ser	missense	5	3.3	1.15			eGFR>45						18	17	0	1	0	nocornvert	2	noKidneyTransp	0	cardiop	noangiok	0	0	4	arryhthmia	nostroke	0	noPain	nosudationtrbl	105.845	31.2984	232.155	336.394
F285	43.3	69	181	21.1	Male	Fabry	Treated	Non_Classic	Agalsidase alfa / Miglastat	3.99726	Positive	N215S	c.644A>G	p.Asn215Ser	missense	5			61	132.597	eGFR>45	14.8	4.33	1.53	2.36	231	6	0	3	3	0	nocornvert	0	noKidneyTransp	0	nocardiop	noangiok	0	0	0	arryhthmia	nostroke	3	Pain	nosudationtrbl	174.372	23.2453	153.564	434.658
F222	33.4	64	160	25	Female	Fabry	Treated	Classic	Agalsidase beta	10.2697	Positive	G183A	c.548G>C	p.Gly183Ala	missense	4	7.3	1.15	71	86.061	eGFR>45	10.7	8.64	1.8	6.1	296	20	2	2	8	8	cornvert	2	noKidneyTransp	0	nocardiop	noangiok	1	0	0	arryhthmia	stroke	5	Pain	sudationtrbl	36.3	75.17	272.94	261.9
F266	59.4	63	166	22.9	Male	Fabry	Treated	Classic	Agalsidase beta	5.57153	Positive	R112C	c.334C>T	p.Arg112Cys	missense	2	12.5	1.12	252	24.0891	eGFR<45	12.8	9.4	1.4	6.8	300	37	3	13	13	8	cornvert	4	noKidneyTransp	0	cardiop	angiok	0	0	0	arryhthmia	nostroke	3	Pain	sudationtrbl	364.457	29.7996	138.286	772.345
F291	36.9	86	165	31.6	Female	Fabry	Treated	Non_Classic	Agalsidase alfa / Agalsidase beta	11.0144	Positive	c.123delC	c.123del	p.Met42Trpfs*79	mtp	1	2.4	1.25	42	155.419	eGFR>45						15	2	1	8	4	nocornvert	1	noKidneyTransp	0		noangiok			0	noarryhthmia	stroke	5	noPain	nosudationtrbl	225.824	48.4095	74.5037	1369.74
F290	43	95	172	32.1	Female	Fabry	Non_Treated	Non_Classic	Non Treated		Positive	A143T	c.427G>A	p.Ala143Thr	missense	3	1.3				eGFR>45						1	0	0	1	0		0	noKidneyTransp	0	nocardiop	noangiok	0	0	0	noarryhthmia	nostroke	0	noPain	nosudationtrbl	128.348	52.1755	104.114	710.268
F277	52.4	63	168	22.3	Female	Fabry	Non_Treated	Non_Classic	Non Treated		Positive	R363C	c.1087C>T	p.Arg363Cys	missense	7	1.6	1.24			eGFR>45						2	0	2	0	0	nocornvert	2	noKidneyTransp	0	nocardiop	angiok	0	0	0	noarryhthmia	nostroke	0	noPain	nosudationtrbl	172.464	23.8881	246.41	799.759
F257	41.1	120	184	35.4	Male	Fabry	Treated	Classic	Agalsidase alfa / Agalsidase beta	12.2163	Negative	g11047del11	c.1069_1079del	p.Gln357Trpfs*14	mtp	7	18.9	1	89	86.3668	eGFR>45						24	2	9	5	8	cornvert	2	noKidneyTransp	0	nocardiop	angiok	0	1	0	arryhthmia	nostroke	0	Pain	sudationtrbl	40	59.61	349.08	339.9
F235	31.9	56	174	18.5	Male	Fabry	Treated	Classic	Agalsidase alfa	11.332	Negative	A292V	c.875C>T	p.Ala292Val	missense	6	15	0.93	67	125.916	eGFR>45	13.7	8.9	1.4	6.7	254	8	3	2	3	0		0	noKidneyTransp	0	nocardiop	angiok	0	0	0	noarryhthmia	nostroke	0	Pain	sudationtrbl	156.1	56.84	810.07	131.5
F283	61.4	145	192	39.3	Male	Fabry	Treated	Non_Classic	Agalsidase alfa	4.39699	Positive	R363C	c.1087C>T	p.Arg363Cys	missense	7	1.9	0.81	115	59.1566	eGFR>45	16.2	7.17	1.9	4.2	158	24	20	2	2	0	nocornvert	2	noKidneyTransp	0	cardiop	noangiok	0	0	3	arryhthmia	nostroke	0	noPain	nosudationtrbl	130.5	29.67	416.03	221
F251	41.4	64			Female	Fabry	Non_Treated	Non_Classic	Non Treated		Positive	c1277_1278del	c.1277_1278del	p.Lys426Argfs*24	mtp	7	3.6	0.96	70	84.0501	eGFR>45	14.8	7.27	2.4	3.3	245	15	2	3	2	8		2	noKidneyTransp	0	nocardiop	noangiok	0	0	0	arryhthmia	nostroke	0	noPain	nosudationtrbl	189.1	76.61	481.29	167.5
F263	46.1	60	157	24.3	Male	Fabry	Treated	Classic	Agalsidase alfa	5.68925	Negative	R301X	c.901C>T	p.Arg301*	mtp	6	60	0.35	77	99.6385	eGFR>45						27	2	11	14	0	cornvert	0	noKidneyTransp	0		angiok			0	arryhthmia	nostroke	3	Pain	sudationtrbl	316.2	100.28	635.57	303.9
F278	33.9	74	176	23.9	Male	Fabry	Treated	Classic	Agalsidase alfa	5.71937	Positive	R112C	c.334C>T	p.Arg112Cys	missense	2	24	1.2	999	5	eGFR<45	14.6	5.56			137	39	9	7	5	18	cornvert	5	KidneyTransp	1	cardiop	angiok	0	0	1	noarryhthmia	nostroke	0	Pain	sudationtrbl	181.686	16.425	210.273	685.192
F264	61.9	57	162	21.7	Female	Fabry	Treated	Classic	Agalsidase beta	11.0828	Positive						3	1.14	57	98.7267	eGFR>45	13.8	11.5	2.24	8.59	304	20	14	1	5	0	cornvert	0	noKidneyTransp	0	cardiop		0	0	1	noarryhthmia	stroke	5		nosudationtrbl	332.286	17.1871	173.029	460.048
F259	34.6	51	164	19	Female	Fabry	Treated	Classic	Agalsidase alfa	4.28474	Positive	R112C	c.334C>T	p.Arg112Cys	missense	2	4.5	1.23	89	66.0492	eGFR>45	13.9	4.2	1.46	2.28	320	28	4	11	5	8	cornvert	2	noKidneyTransp	0	nocardiop	angiok		1	3	arryhthmia	nostroke	0	Pain	sudationtrbl	63.4735	34.339	334.208	649.762
F239	24.9	84	183	25.1	Male	Fabry	Treated	Non_Classic	Agalsidase beta	-0.0383299	Positive	R301Q	c.902G>A	p.Arg301Gln	missense	6	2	0.87	75	115.728	eGFR>45	15	5.7	1.48	3.65	266	4	0	2	2	0	nocornvert		noKidneyTransp	0	nocardiop	noangiok	0	0	0	arryhthmia	nostroke	0	noPain	sudationtrbl	85.9	27.98	104.94	164.7
F243	69.3	105	178	33.1	Male	Fabry	Non_Treated	Non_Classic	Non Treated		Positive	N215S	c.644A>G	p.Asn215Ser	missense	5		1.15	70	102.876	eGFR>45	14.8	7.57	1.47	5.09	221	18	16	2	0	0	nocornvert	0	noKidneyTransp	0	cardiop		1	0	4	arryhthmia	nostroke	0	noPain	nosudationtrbl	144.889	41.2538	387.113	1151.97
F258	47.3	67	182	20.2	Male	Fabry	Treated	Non_Classic	Agalsidase beta	13.0459	Negative	Q283X	c.847C>T	p.Gln283*	mtp	6	25.4	0.36	77	99.2736	eGFR>45	11.8	3.4	1.1	2		12	10	2	0	0	nocornvert	0	noKidneyTransp	0	cardiop	angiok	0	0	1	noarryhthmia	nostroke	0	noPain	nosudationtrbl	46.8752	11.4108	169.221	608.491
F240	50.9	60	160	23.4	Female	Fabry	Non_Treated	Non_Classic	Non Treated		Positive	V390M	c.1168G>A	p.Val390Met	missense	7	0.6				eGFR>45						6	0	1	5	0	nocornvert	0	noKidneyTransp	0	nocardiop	angiok	0	0	0	noarryhthmia	stroke	5	noPain	nosudationtrbl	130.75	57.84	194.695	202.6
F270	58.6	74	159	29.3	Female	Fabry	Treated	Non_Classic	Agalsidase alfa / Agalsidase beta	7.06913	Positive	R112C	c.334C>T	p.Arg112Cys	missense	2	5.3	1.13	51	113.42	eGFR>45	12.8	6.4	3.2	2.4	302	1	1	0	0	0	nocornvert	0	noKidneyTransp	0	cardiop	angiok	0	0	0	noarryhthmia	nostroke	0	Pain	nosudationtrbl	114.233	20.7279	57.9661	623.622
F237	55.4	52	154	21.9	Female	Fabry	Treated	Classic	Agalsidase beta	0.889802	Positive	c.214delA	c.214del	p.Met72Trpfs*49	mtp	2		0.88	55	105.413	eGFR>45						6	2	2	2	0	cornvert	0	noKidneyTransp	0	nocardiop	noangiok	0	0	0	noarryhthmia	nostroke	0	Pain	sudationtrbl	722.81	35.6757	730.346	837.308
F281	33.2	53	153	22.6	Female	Fabry	Non_Treated	Classic	Non Treated		Positive	Q280H	c.840A>T	p.Gln280His	missense	6	3.3		60	105.243	eGFR>45	13.8	8.3	2.7	4.8		5	0	0	5	0		0	noKidneyTransp	0	nocardiop	noangiok	0	0	0	noarryhthmia	nostroke	0	Pain	sudationtrbl	13.3534	14.7669	97.101	207.142
F268	60.8	86	177	27.5	Male	Fabry	Treated	Non_Classic	Agalsidase beta	7.45791	Positive	S238N	c.713G>A	p.Ser238Asn	missense	5	2.2	1.12	81	89.1011	eGFR>45	16.6	5.5		1.9		26	17	1	0	8	nocornvert	2	noKidneyTransp	0	cardiop	noangiok	0	0	4	arryhthmia	nostroke	0	noPain	sudationtrbl	148.898	25.3429	69.9096	752.658
F304	34.7	125	183	37.3	Male	Fabry	Treated	Non_Classic	Agalsidase beta	1.32238	Positive	N215S	c.644A>G	p.Asn215Ser	missense	5	2.7	0.75	68	121	eGFR>45	14.6	7.2		4.7	171	20	13	1	6	0	nocornvert	0	noKidneyTransp	0	cardiop	angiok	0	0	3	noarryhthmia	nostroke	0	Pain	sudationtrbl	99.1678	14.6755	91.8524	373.309
F249	74.2	73	174	24.1	Male	Fabry	Treated	Non_Classic	Agalsidase beta	1.64545	Positive	N215S	c.644A>G	p.Asn215Ser	missense	5	6.7	1.19	201	29.9866	eGFR<45	16.1	7.87	1.53	5.07	191	34	15	6	5	8	nocornvert	3	noKidneyTransp	0	cardiop	noangiok	0	0	4	arryhthmia	nostroke	3	noPain	sudationtrbl	219.685	9.85597	68.8621	300.292
F261	43.3				Male	Fabry	Treated	Classic	Agalsidase beta	13.8316	Negative	Q57X	c.169C>T	p.Gln57*	mtp	1	31.3	0.04		5	eGFR<45						29	1	4	6	18		5	KidneyTransp	1	cardiop	angiok			0	noarryhthmia		0	Pain	nosudationtrbl	80.0718	30.0615	349.509	691.033
F300	27.2	80	164	29.7	Female	Fabry	Non_Treated	Classic	Non Treated		Positive	R112C	c.334C>T	p.Arg112Cys	missense	2	3.2	1.12	69	92.5613	eGFR>45	13.2	7.5	2.6	4		23	0	9	14	0	cornvert	0	noKidneyTransp	0	nocardiop	noangiok	0	0	0	noarryhthmia	nostroke	3	Pain	sudationtrbl	411.709	56.5033	417.226	951.007
F226	22.2	54	176	17.4	Male	Fabry	Non_Treated	Classic	Non Treated		Positive						79.7	0	79	112.554	eGFR>45	14.7	5.1	1.42	2.86	227	6	0	3	3	0		0	noKidneyTransp	0	nocardiop	angiok	0	0	0	noarryhthmia	nostroke	0	Pain	sudationtrbl	15.8	61.97	192.46	281.8
F247	36.1	71	167	25.5	Female	Fabry	Non_Treated	Non_Classic	Non Treated		Positive	R112C	c.334C>T	p.Arg112Cys	missense	2	3.8		62	99.6883	eGFR>45	13.3	12.3	5.7	5.1	250	5	0	1	0	4	cornvert	1	noKidneyTransp	0	nocardiop	noangiok	0	0	0	noarryhthmia	nostroke	0	noPain	nosudationtrbl	153.8	44.27	342.54	199.3
F296	49.2	85	182	25.7	Male	Fabry	Treated	Classic	Agalsidase beta	0	Positive	c802-3_802-2del	c.802-3_802-2del	p.?	mtp	0	109.3	1.23	240	26.4282	eGFR<45	14	6.5	1.4	4.4	240	35	17	4	6	8	cornvert	4	noKidneyTransp	0	cardiop	angiok	0	0	4	arryhthmia	nostroke	0	Pain	sudationtrbl	233.345	21.7999	328.562	588.224
F238	70.1	76	156	31.2	Female	Fabry	Treated	Classic	Agalsidase alfa	0.205339	Positive	c802-3_802-2 delCA	c.802-3_802-2del	p.?	mtp	0	7.8	1.04	54	102.65	eGFR>45	13.9	8.9	3.91	4.37	294	20	15	1	4	0	cornvert	0	noKidneyTransp	0	cardiop	noangiok	0	0	3	arryhthmia	nostroke	0	Pain	nosudationtrbl	404.355	31.8279	417.643	501.004
F241	20.2	50			Male	Fabry	Non_Treated	Classic	Non Treated		Positive						123.9	0	65	144.432	eGFR>45						4	2	0	2	0		0	noKidneyTransp	0	nocardiop	noangiok	0	0	0	noarryhthmia	nostroke		Pain	sudationtrbl	175.6	87.7	284.45	240.5
F227	25	63	183	18.8	Male	Fabry	Treated	Non_Classic	Agalsidase alfa / Agalsidase beta	2.95414	Positive	V339G	c.1016T>G	p.Val339Gly	missense	7	11.5	1.11	56	162.557	eGFR>45	12.6	6.11	2.34	3.15	228	25	9	4	12	0	nocornvert	0	noKidneyTransp	0	cardiop	angiok	0	0	0	noarryhthmia	nostroke	3	Pain	sudationtrbl	141.201	31.8084	45.1259	554.37
F265	53.4	58	157	23.5	Female	Fabry	Non_Treated	Non_Classic	Non Treated		Positive	R301X	c.901C>T	p.Arg301*	mtp	6	3.7		60	95.863	eGFR>45	12.5	8			284	5	2	3	0	0	cornvert	0	noKidneyTransp	0	nocardiop	angiok	0	0	0	noarryhthmia	nostroke	0	noPain	nosudationtrbl	348.371	36.5311	524.405	616.196
F271	24.6	75	168	26.6	Female	Fabry	Treated	Classic	Agalsidase beta	2.6256	Positive	S78X	c.233C>G	p.Ser78*	mtp	2	4.8	1.11	70	93.3395	eGFR>45	12.4	5.9	2.1	3.2	263	9	0	4	5	0		0	noKidneyTransp	0	nocardiop	noangiok	0	0	0	noarryhthmia	nostroke	0	Pain	sudationtrbl	66.6	23.54	407.95	179.1
F223	46.6	105	170	36.3	Female	Fabry	Treated	Non_Classic	Miglastat		Positive	A143T	c.427G>A	p.Ala143Thr	missense	3	1.1	0.11	51	118.424	eGFR>45	13.8	7.9	1.89	5.36	203	13	0	8	5	0	nocornvert	0	noKidneyTransp	0	nocardiop	angiok	0	0	0	noarryhthmia	nostroke	0	Pain	nosudationtrbl	287.356	32.9163	83.8051	871.374
F279	43	68	172	23	Male	Fabry	Treated	Non_Classic	Agalsidase beta	0.0383299	Positive	D231G	c.692A>G	p.Asp231Gly	missense	5	16.7	1.11	73	107.535	eGFR>45	14.4	4.1	1.15	2.52	163	26	12	9	5	0	nocornvert	2	noKidneyTransp	0	cardiop	angiok	0	1	2	noarryhthmia	stroke	0	Pain	sudationtrbl	190.908	27.1466	72.5724	570.625
F298	17.1	50	70	102	Male	Fabry	Non_Treated	Non_Classic	Non Treated		Positive	c802-3_802-2del	c.802-3_802-2del	p.?	mtp	0	73	0.97	65	145.615	eGFR>45	13.4	8.1	1.9	5.2	272	7	0	2	5	0	nocornvert	0	noKidneyTransp	0	nocardiop	angiok	0	0	0	noarryhthmia	nostroke	0	Pain	sudationtrbl	259.365	44.8891	384.415	867.871
F276	67.6	56	175	18.3	Male	Fabry	Treated	Non_Classic	Agalsidase beta	7.17317	Positive	W162C	c.486G>C	p.Trp162Cys	missense	3	22.5	0.95	97	70.6554	eGFR>45						1	0	1	0	0	nocornvert	2	noKidneyTransp		cardiop	noangiok	0	0	2	arryhthmia	nostroke	0	noPain	nosudationtrbl	163.242	35.1254	598.421	914.326
F242	53.2	49	159	19.4	Female	Fabry	Non_Treated	Classic	Non Treated		Positive	c.214delA	c.214del	p.Met72Trpfs*49	mtp	2	10.6	0.99			eGFR>45	13	6.93	2.3	3.78	270	8	3	1	4	0			noKidneyTransp	0	nocardiop		0	0	0	arryhthmia	nostroke	0	Pain	sudationtrbl	239.756	53.0384	481.159	1416.96
F255	46.3	94	181	28.7	Male	Fabry	Treated	Classic	Agalsidase beta	4.30664	Positive	F337S	c.1010T>C	p.Phe337Ser	missense	7	3.3	1.2	96	77.2361	eGFR>45	16.1	8.57	2.6	4.9	268	20	6	4	2	8	cornvert	2	noKidneyTransp	0	cardiop	noangiok	0	0	2	arryhthmia	nostroke	0	Pain	sudationtrbl	132.695	29.33	197.3	392.802
F282	65.3	92	155	38.3	Female	Fabry	Treated	Classic	Agalsidase alfa / Agalsidase beta	11.8193	Positive	C142R	c.424T>C	p.Cys142Arg	missense	3	1.8	1.03	97	52.9194	eGFR>45	13.7	9	2.79	5.35	366	25	12	2	3	8	cornvert	3	noKidneyTransp	0	cardiop	angiok	0	0	1	arryhthmia	nostroke	0	Pain	nosudationtrbl	226.47	32.4747	187.894	1212.18
F293	39.8	61	164	22.7	Male	Fabry	Treated	Classic	Agalsidase alfa / Agalsidase beta	4.30938	Positive	c539delT	c.539del	p.Leu180Trpfs*12	mtp	3	13.4	1.3	64	126.572	eGFR>45	12.6	10.1	1.58	7.6	319	30	11	3	16	0	cornvert	0	noKidneyTransp	0	cardiop	noangiok	0	0	1	noarryhthmia	stroke	5	Pain	sudationtrbl	35.1784	26.1884	173.922	927.325
F301	58.1	57	165	20.9	Male	Fabry	Treated	Non_Classic	Agalsidase alfa	0.361396	Positive	N215S	c.644A>G	p.Asn215Ser	missense	5	8.5	1.06	62	121.957	eGFR>45	12.8	8.77			359	26	14	4	8	0	nocornvert	0	noKidneyTransp	0	cardiop	noangiok	0	0	3	noarryhthmia	nostroke	0	Pain	sudationtrbl	564.053	40.055	455.893	1034.14
F262	69	95	152	41.1	Female	Fabry	Non_Treated	Classic	Non Treated		Positive	R301X	c.901C>T	p.Arg301*	mtp	6	2.05		64	84.5506	eGFR>45	13.2	9.3	2.94	5.36	251	21	3	7	3	8	cornvert	2	noKidneyTransp	0	nocardiop	angiok	0	0	0	arryhthmia	nostroke	0	Pain	sudationtrbl	176.163	40.6049	189.633	855.077
F248	21.5	65	178	20.5	Male	Fabry	Treated	Classic	Agalsidase alfa	3.62491	Positive	H46R	c.137A>G	p.His46Arg	missense	1	10.6	1.09	58	160.035	eGFR>45	13.8	4.18	1.95	1.81	174	14	1	5	8	0	cornvert	0	noKidneyTransp	0	nocardiop	angiok	0	0	0	arryhthmia	nostroke	0	Pain	sudationtrbl	30.0177	25.7736	178.294	439.536
F245	30.3	51	166	18.5	Female	Fabry	Non_Treated	Classic	Non Treated		Positive	c1277_1278del	c.1277_1278del	p.Lys426Argfs*24	mtp	7		0.94	65	98.0783	eGFR>45	14.6	5.25	1.84	2.84	257	4	0	1	3	0	cornvert	0	noKidneyTransp	0	nocardiop	noangiok	0	1	0	noarryhthmia	nostroke	0	Pain	nosudationtrbl	50.0215	29.4692	293.067	886.968
F273	50.1	47	162	17.9	Female	Fabry	Non_Treated	Classic	Non Treated		Positive	R301X	c.901C>T	p.Arg301*	mtp	6	1.3		54	109.61	eGFR>45	11.9	5.4			308	10	2	3	5	0	cornvert	0	noKidneyTransp	0	nocardiop	angiok	0	0	0	arryhthmia	nostroke	0	Pain	sudationtrbl	12.1313	50.1327	323.264	902.161
C122	49				Male	Control	Control		Non Treated																																					1.5	4.19	30.01	45.4
C123	49				Male	Control	Control		Non Treated																																					2.28664	1.80563	32.6214	0
C125	52				Male	Control	Control		Non Treated																																					9.42864	0.578675	39.6003	78.9406
C127	54				Male	Control	Control		Non Treated																																					0	0.78381	9.80932	91.8535
C129	46				Male	Control	Control		Non Treated																																					2.39125	1.65959	20.7138	65.2835
C130	58				Male	Control	Control		Non Treated																																					1.44126	6.56053	35.2736	92.6336
C131	43				Male	Control	Control		Non Treated																																					0.9	4.25	123.97	0
C134	36				Male	Control	Control		Non Treated																																					0.9	9.56	185.57	119.8
C135	61				Male	Control	Control		Non Treated																																					3.52421	1.22708	44.8563	113.514
C138	64				Male	Control	Control		Non Treated																																					0.560366	3.31985	6.04328	56.3687
C139	20				Male	Control	Control		Non Treated																																					0.849849	0.599874	7.26497	85.6106
C141	26				Male	Control	Control		Non Treated																																					1.01645	0.341763	11.1194	54.8319
C142	24				Male	Control	Control		Non Treated																																					1.60571	1.23186	25.8236	67.4071
C143	34				Male	Control	Control		Non Treated																																					2.2	5.33	61.97	56.2
C144	37				Male	Control	Control		Non Treated																																					3.59453	1.87864	39.247	71.2695
C145	49				Male	Control	Control		Non Treated																																					2.2	2.04	80.98	66.9
C146	48				Male	Control	Control		Non Treated																																					2.3261	1.10021	42.3917	0
C147	41				Male	Control	Control		Non Treated																																					0	2.55243	11.2874	72.983
C148	30				Male	Control	Control		Non Treated																																					0.420491	1.10326	17.4053	56.6046
C149	38				Male	Control	Control		Non Treated																																					1.26401	0.784727	18.5704	46.6891
C150	30				Male	Control	Control		Non Treated																																					0.334791	1.5475	8.07167	39.4116
C151	50				Male	Control	Control		Non Treated																																					0.72796	1.80392	16.1561	0
C152	23				Male	Control	Control		Non Treated																																					1.1	3.18	39.95	62.6
C153	25				Male	Control	Control		Non Treated																																					0	0.868363	11.6333	0
C154	55				Male	Control	Control		Non Treated																																					1.53164	1.21239	26.1155	33.9433
C155	24				Male	Control	Control		Non Treated																																					0.540726	0.585822	10.0045	47.9039
C156	30				Male	Control	Control		Non Treated																																					0.568097	0.627146	14.4544	0
C157	32				Male	Control	Control		Non Treated																																					4.27942	0.637951	15.882	62.7902
C158	41				Male	Control	Control		Non Treated																																					1.52496	0.741864	23.4436	61.6003
C159	31				Male	Control	Control		Non Treated																																					1.95111	1.14567	11.9806	0
C160	37				Male	Control	Control		Non Treated																																					1.86807	2.76151	26.439	63.5128
C161	52				Male	Control	Control		Non Treated																																					2.4	1.99	68.52	78.7
C163	41				Male	Control	Control		Non Treated																																					2.27688	1.19308	15.7451	43.8202
C164	56				Male	Control	Control		Non Treated																																					0.613765	2.42332	16.0422	59.3104
C165	25				Male	Control	Control		Non Treated																																					1.42561	0.919068	14.2783	46.6675
C166	35				Male	Control	Control		Non Treated																																					0.916228	1.76796	22.4528	66.4959
C168	55				Male	Control	Control		Non Treated																																					1.42906	0.905254	5.36646	31.968
C170	56				Male	Control	Control		Non Treated																																					1.99985	1.16679	26.5669	43.6638
C171	35				Male	Control	Control		Non Treated																																					0.868456	1.35574	16.1563	39.715
C172	60				Female	Control	Control		Non Treated																																					2.32675	1.23866	17.1424	48.088
C173	60				Female	Control	Control		Non Treated																																					3.78033	0.801856	10.3739	68.7879
C174	53				Female	Control	Control		Non Treated																																					2.95038	1.72683	14.0526	51.043
C175	61				Female	Control	Control		Non Treated																																					0	0.604969	13.8456	42.8946
C176	56				Female	Control	Control		Non Treated																																					1.07667	1.66218	16.0314	54.8695
C177	59				Female	Control	Control		Non Treated																																					0.950497	0.544525	19.0835	26.7522
C178	56				Female	Control	Control		Non Treated																																					0.882109	0.719928	17.9967	64.149
C179	30				Female	Control	Control		Non Treated																																					2.20696	0.995219	27.7401	49.8946
C180	55				Female	Control	Control		Non Treated																																					1.33049	0.810334	12.8836	55.5906
C181	62				Female	Control	Control		Non Treated																																					2.53966	0.905413	16.0808	23.0467
C182	50				Female	Control	Control		Non Treated																																					1.1	1.89	41.95	67.7
C183	47				Female	Control	Control		Non Treated																																					2.64241	1.08091	11.57	96.6475
C185	21				Female	Control	Control		Non Treated																																					2.1	2.5	42.48	60.5
C186	33				Female	Control	Control		Non Treated																																					2.89416	1.96896	20.2256	199.974
C187	30				Female	Control	Control		Non Treated																																					3.0221	0.863722	17.3357	63.5155
C188	21				Female	Control	Control		Non Treated																																					1.70094	4.53339	9.10281	131.57
C189	25				Female	Control	Control		Non Treated																																					1.79543	0.819824	27.142	92.3075
C190	30				Female	Control	Control		Non Treated																																					0.759491	0.828329	14.8524	61.7507
C191	21				Female	Control	Control		Non Treated																																					1.62468	3.90438	28.0594	110.635
C192	63				Female	Control	Control		Non Treated																																					1.13524	1.38215	38.3829	46.1362
C193	40				Female	Control	Control		Non Treated																																					2.1	1.97	96.41	95
C194	20				Female	Control	Control		Non Treated																																					2.16964	0.735153	14.4532	72.9935
C195	45				Female	Control	Control		Non Treated																																					1.8	3.4	120.35	86.5
C196	46				Female	Control	Control		Non Treated																																					0	1.78952	19.0973	38.5807
C197	36				Female	Control	Control		Non Treated																																					1.4	2.84	47.1	102
C198	48				Female	Control	Control		Non Treated																																					0.621024	1.32509	19.7105	117.237
C200	51				Female	Control	Control		Non Treated																																					1.11856	0.570411	33.1913	55.8297
C201	27				Female	Control	Control		Non Treated																																					0.992871	0.924826	17.9437	52.2045
C202	49				Female	Control	Control		Non Treated																																					0.66493	3.07979	54.0254	107.274
C204	69				Female	Control	Control		Non Treated																																					4.8	9.73	316.18	268.4
C205	36				Female	Control	Control		Non Treated																																					0.912744	1.01627	32.2394	63.8858
C206	63				Female	Control	Control		Non Treated																																					2.26956	0.542473	33.4001	46.7331
C207	47				Female	Control	Control		Non Treated																																					6.26607	1.26581	69.8633	68.0792
C208	26				Female	Control	Control		Non Treated																																					0.9	7.81	68.3	125.7
C209	41				Female	Control	Control		Non Treated																																					2.7	54.39	124.14	268.6
C210	47				Female	Control	Control		Non Treated																																					4.29157	1.7134	56.328	153.875
C211	30				Female	Control	Control		Non Treated																																					1.29027	0.645839	16.815	54.0032
C213	63				Female	Control	Control		Non Treated																																					3.29273	1.26584	27.5894	106.53
C214	62				Female	Control	Control		Non Treated																																					2.52342	0.758667	16.3068	49.5446
C215	26				Female	Control	Control		Non Treated																																					4.11155	2.03241	53.5804	114.299
C216	52				Female	Control	Control		Non Treated																																					3.3	7.03	61.58	87.7
C217	32				Female	Control	Control		Non Treated																																					3.98867	0.804868	40.2738	65.4282
C220	31				Female	Control	Control		Non Treated																																					1.65361	1.15677	39.262	54.341
C221	32				Female	Control	Control		Non Treated																																					0.827819	0.717723	30.0809	37.5708
G1	66				Male	Gaucher	Non_Treated		Non Treated																																					17.7905	1.28072	39.7296	89.7429
G2	48				Female	Gaucher	Non_Treated		Non Treated																																					41.3267	5.09185	43.912	48.741
G3	46				Male	Gaucher	Non_Treated		Non Treated																																					67.603	3.48179	291.688	359.19
G4	21				Female	Gaucher	Non_Treated		Non Treated																																					22.6078	1.38203	47.0966	40.7563
G5	74				Male	Gaucher	Non_Treated		Non Treated																																					38.7164	3.98344	52.7833	120.107
G6	69				Female	Gaucher	Non_Treated		Non Treated																																					11.4734	1.84881	46.2251	48.7384
G7	46				Male	Gaucher	Non_Treated		Non Treated																																					113.042	4.25157	153.919	141.697
G8	26				Male	Gaucher	Non_Treated		Non Treated																																					6.70469	0.972801	54.1718	61.5975
G9	24				Male	Gaucher	Non_Treated		Non Treated																																					7.13428	1.75549	32.6759	46.6891
G10	51				Female	Gaucher	Non_Treated		Non Treated																																					5.30182	5.53618	65.4203	128.038
G11	24				Female	Gaucher	Non_Treated		Non Treated																																					10.4311	0.873692	50.1699	72.8488
G12	28				Female	Gaucher	Non_Treated		Non Treated																																					24.7455	1.62911	78.5651	82.3014
G13	18				Male	Gaucher	Non_Treated		Non Treated																																					5.07743	1.61838	85.3866	77.763
G14	8				Male	Gaucher	Non_Treated		Non Treated																																					24.4029	1.43614	30.5543	63.9773
G15	33				Female	Gaucher	Non_Treated		Non Treated																																					10.4807	2.80377	38.9261	72.9311
G16	86				Female	Gaucher	Non_Treated		Non Treated																																					18.8522	2.29406	53.6183	94.3122
G17	51				Male	Gaucher	Non_Treated		Non Treated																																					9.57892	2.61168	85.4214	128.746
G18	21				Female	Gaucher	Non_Treated		Non Treated																																					27.8444	3.54325	38.9361	93.1269
G19	35				Female	Gaucher	Non_Treated		Non Treated																																					2.41152	1.05411	172.069	69.7326
G21	31				Female	Gaucher	Non_Treated		Non Treated																																					5.05802	0.877219	21.7383	0
G23	45				Female	Gaucher	Non_Treated		Non Treated																																					4.63487	3.51968	24.0239	41.9071
G25	49				Male	Gaucher	Non_Treated		Non Treated																																					2.41813	0.887806	57.5752	83.9503
G27	38				Male	Gaucher	Non_Treated		Non Treated																																					10.869	7.77424	129.902	152.432
G29	29				Male	Gaucher	Non_Treated		Non Treated																																					37.6073	8.0628	85.7903	236.909
G31	40				Male	Gaucher	Non_Treated		Non Treated																																					56.0936	1.07032	27.8514	298.032
G33	43				Male	Gaucher	Non_Treated		Non Treated																																					44.5843	2.13939	69.6284	236.874
G35	33				Female	Gaucher	Non_Treated		Non Treated																																					33.075	2.47904	10.2087	175.715
G37	59				Female	Gaucher	Non_Treated		Non Treated																																					21.5656	1.23614	70.1544	114.557
G39	58				Male	Gaucher	Non_Treated		Non Treated																																					26.7022	2.81978	78.3821	84.8711
G41	21				Male	Gaucher	Non_Treated		Non Treated																																					5.21462	5.83598	211.059	118.762
P63					Female	Pompe	Non_Treated		Non Treated																																					3.46015	22.5849	71.322	569.725
P64	56				Female	Pompe	Non_Treated		Non Treated																																					3.48816	33.2311	253.902	552.219
P65	67				Male	Pompe	Non_Treated		Non Treated																																					3.51617	39.6506	131.105	534.713
P66	66				Female	Pompe	Non_Treated		Non Treated																																					3.54418	26.6335	54.6739	517.208
P67	62				Male	Pompe	Non_Treated		Non Treated																																					3.5722	13.7	200.222	499.702
P68	47				Male	Pompe	Non_Treated		Non Treated																																					3.60021	12.8618	206.372	482.196
P69	51				Male	Pompe	Non_Treated		Non Treated																																					3.62822	14.2709	174.574	464.691
P70	77				Male	Pompe	Non_Treated		Non Treated																																					3.65623	22.2216	270.157	447.185
P71	32				Female	Pompe	Non_Treated		Non Treated																																					3.68424	29.1274	43.6147	429.679
P72	28				Female	Pompe	Non_Treated		Non Treated																																					3.71225	11.1657	48.886	412.174
P73	43				Male	Pompe	Non_Treated		Non Treated																																					3.74026	21.1642	70.0236	394.668
P74	56				Male	Pompe	Non_Treated		Non Treated																																					3.76828	15.3486	128.498	377.163
P75	72				Male	Pompe	Non_Treated		Non Treated																																					3.79629	17.0013	102.242	359.657
P76	67				Female	Pompe	Non_Treated		Non Treated																																					2.81125	14.8852	49.0235	539.157
P77	47				Female	Pompe	Non_Treated		Non Treated																																					3.00155	14.031	51.2494	549.672
P78	52				Female	Pompe	Non_Treated		Non Treated																																					3.19186	15.8177	264.937	560.187
P79	47				Female	Pompe	Non_Treated		Non Treated																																					3.38216	13.3979	69.1031	570.702
P80	64				Male	Pompe	Non_Treated		Non Treated																																					3.57246	31.873	298.932	581.217
P81	48				Female	Pompe	Non_Treated		Non Treated																																					3.76276	17.1499	177.166	591.732
P82	68				Female	Pompe	Non_Treated		Non Treated																																					3.95306	0	0	602.247
P83	57				Male	Pompe	Non_Treated		Non Treated																																					4.14336	11.9009	97.1459	612.763
P84	61				Male	Pompe	Non_Treated		Non Treated																																					4.33367	12.8662	154.439	623.278
P85	56				Male	Pompe	Non_Treated		Non Treated																																					4.52397	16.8295	87.6083	633.793
P86	48				Female	Pompe	Non_Treated		Non Treated																																					4.71427	16.2892	58.2008	644.308
P87	56				Male	Pompe	Non_Treated		Non Treated																																					4.90457	18.9461	80.0557	654.823
P88	43				Female	Pompe	Non_Treated		Non Treated																																					5.09487	14.281	104.535	665.338
P89	44				Female	Pompe	Non_Treated		Non Treated																																					5.28518	20.3352	91.0167	675.853
P90	75				Male	Pompe	Non_Treated		Non Treated																																					5.47548	28.1689	285.855	686.368
P91	35				Male	Pompe	Non_Treated		Non Treated																																					5.66578	43.0855	44.5623	696.883
P92	42				Female	Pompe	Non_Treated		Non Treated																																					5.85608	19.7047	51.0534	707.398
P93	61				Female	Pompe	Non_Treated		Non Treated																																					7.13921	12.9479	92.7644	423.352
P94	64				Female	Pompe	Non_Treated		Non Treated																																					11.4735	16.351	117.489	481.194
P95	77				Female	Pompe	Non_Treated		Non Treated																																					15.8079	22.8763	95.6795	539.036
P96	46				Female	Pompe	Non_Treated		Non Treated																																					20.1422	20.1112	122.497	596.878
P97	71				Female	Pompe	Non_Treated		Non Treated																																					24.4766	18.5917	137.638	654.719
P98	45				Male	Pompe	Non_Treated		Non Treated																																					28.8109	11.3409	81.2139	712.561
P99	66				Male	Pompe	Non_Treated		Non Treated																																					6.97752	27.6504	679.261	747.458
P100	25				Male	Pompe	Non_Treated		Non Treated																																					74.6034	5.34442	179.113	434.41
P101	68				Female	Pompe	Non_Treated		Non Treated																																					108.729	9.61347	325.905	806.295
P102	42				Male	Pompe	Non_Treated		Non Treated																																					142.854	13.8825	472.698	1178.18
P103	62				Male	Pompe	Non_Treated		Non Treated																																					20.2134	17.488	135.613	681.992
P104	56				Male	Pompe	Non_Treated		Non Treated																																					14.9778	14.7887	101.948	462.818
P105	48				Female	Pompe	Non_Treated		Non Treated																																					0.36023	10.5762	158.184	65.1523
P106	57				Female	Pompe	Non_Treated		Non Treated																																					8.36168	12.7546	77.3358	507.006
P107	50				Female	Pompe	Non_Treated		Non Treated																																					53.7539	4.78373	291.431	537.279
P108	64				Female	Pompe	Non_Treated		Non Treated																																					59.6052	6.91592	447.289	763.53
P109	52				Male	Pompe	Non_Treated		Non Treated																																					86.5516	7.7758	524.541	627.408
P110	54				Female	Pompe	Non_Treated		Non Treated																																					63.8113	7.89932	257.423	317.021
P111	62				Female	Pompe	Non_Treated		Non Treated																																					10.9039	12.8853	301.946	906.569
P112	25				Male	Pompe	Non_Treated		Non Treated																																					7.54817	12.9769	65.3762	734.825
P113	25				Male	Pompe	Non_Treated		Non Treated																																					43.0239	8.03013	158.509	646.902
P114	57				Male	Pompe	Non_Treated		Non Treated																																					52.8738	7.05577	133.041	634.23
P115	68				Male	Pompe	Non_Treated		Non Treated																																					24.0294	6.48241	183.02	350.277
P116	61				Male	Pompe	Non_Treated		Non Treated																																					45.3912	6.68217	348.764	832.041
P117	41				Male	Pompe	Non_Treated		Non Treated																																					49.5855	7.81751	307.458	637.6
P118	61				Male	Pompe	Non_Treated		Non Treated																																					5.55781	16.0167	137.485	184.197
P119	77				Female	Pompe	Non_Treated		Non Treated																																					30.2939	8.92347	166.548	354.819
P120	42				Female	Pompe	Non_Treated		Non Treated																																					15.6752	31.1018	516.425	367.706
P121	50				Female	Pompe	Non_Treated		Non Treated																																					3.43214	13.6236	85.011	587.23
NP13	64				Female	Niemann_Pick_C	Non_Treated		Non Treated																																					67.7226	1.5985	94.8219	152.781
NP31	33				Male	Niemann_Pick_C	Non_Treated		Non Treated																																					13.5029	4.62794	106.369	226.177
NP39	41				Male	Niemann_Pick_C	Non_Treated		Non Treated																																					5.6437	4.20294	54.9759	48.2505
NP41	33				Male	Niemann_Pick_C	Non_Treated		Non Treated																																					9.3995	5.89949	72.619	130.408
NP44	66				Female	Niemann_Pick_C	Non_Treated		Non Treated																																					87.6134	2.32	87.8095	200.142
NP45	41				Male	Niemann_Pick_C	Non_Treated		Non Treated																																					9.16644	1.17238	57.8943	69.1497
NP47	41				Male	Niemann_Pick_C	Non_Treated		Non Treated																																					7.01167	6.92804	51.9661	72.17
NP48	39				Male	Niemann_Pick_C	Non_Treated		Non Treated																																					40.4783	1.07537	32.3204	62.5258
[truncated: 36 more columns]

## Sheet: Table_S2
Characteristic	Statistic	N	Fabry Classic, N = 34 (14%)1	Fabry Non Classic, N = 35 (14%)1	Control, N = 83 (33%)1	Pompe, N = 59 (24%)1	Gaucher, N = 30 (12%)1	Niemann-Pick C, N = 8 (3.2%)1	p-value2
Age (Years)	mean (SD)	248	44 (15)	48 (15)	42 (13)	54 (13)	41 (18)	45 (13)	0.3
Unknown	n		0	0	0	1	0	0
Sex		249							0.5
Female	n / N (%)		20 / 34 (59%)	15 / 35 (43%)	44 / 83 (53%)	30 / 59 (51%)	14 / 30 (47%)	2 / 8 (25%)
Male	n / N (%)		14 / 34 (41%)	20 / 35 (57%)	39 / 83 (47%)	29 / 59 (49%)	16 / 30 (53%)	6 / 8 (75%)
BMI (Kg/m2)	mean (SD)	56	25 (7)	29 (16)					0.2
Unknown	n		4	9
Treatment		69							>0.9
Non Treated	n / N (%)		11 / 34 (32%)	12 / 35 (34%)
Treated	n / N (%)		23 / 34 (68%)	23 / 35 (66%)
Therapy		69							0.3
Agalsidase alfa	n / N (%)		9 / 34 (26%)	3 / 35 (8.6%)
Agalsidase alfa / Agalsidase beta	n / N (%)		4 / 34 (12%)	6 / 35 (17%)
Agalsidase alfa / Agalsidase beta / Miglastat	n / N (%)		0 / 34 (0%)	1 / 35 (2.9%)
Agalsidase alfa / Miglastat	n / N (%)		0 / 34 (0%)	1 / 35 (2.9%)
Agalsidase beta	n / N (%)		10 / 34 (29%)	11 / 35 (31%)
Miglastat	n / N (%)		0 / 34 (0%)	1 / 35 (2.9%)
Non Treated	n / N (%)		11 / 34 (32%)	12 / 35 (34%)
Treatment Duration (Years)	mean (SD)	45	6.8 (4.8)	6.0 (5.2)					0.6
Unknown	n		11	13					0.012
Variant		63							0.011
Missense	n / N (%)		12 / 29 (41%)	25 / 34 (74%)
MTP	n / N (%)		17 / 29 (59%)	9 / 34 (26%)
Unknown	n		5	1
Neutralizing Antibody		69							0.4
Negative	n / N (%)		4 / 34 (12%)	2 / 35 (5.7%)
Positive	n / N (%)		30 / 34 (88%)	33 / 35 (94%)
lysoGb3 (ng/mL)	mean (SD)	63	22 (31)	10 (15)					0.011
Unknown	n		3	3
Residual Enzymatic Activity (%)	mean (SD)	57	0.94 (0.37)	0.98 (0.29)					>0.9
Unknown	n		5	7
Creatinine (mmol/L)	mean (SD)	62	119 (176)	76 (30)					0.7
Unknown	n		3	4
MDRD (mL/min)	mean (SD)	63	85 (41)	102 (30)					0.14
Unknown	n		2	4
eGFR		69							0.055
eGFR<45	n / N (%)		6 / 34 (18%)	1 / 35 (2.9%)
eGFR>45	n / N (%)		28 / 34 (82%)	34 / 35 (97%)
Unknown	n		0	0
Hemoglobin (g/L)	mean (SD)	56	13.42 (1.63)	14.09 (1.34)					0.2
Unknown	n		6	7
Leucocytes (10+9/L)	mean (SD)	55	7.42 (2.10)	6.99 (1.88)					0.5
Unknown	n		6	8
Lymphocytes (10+9/L)	mean (SD)	44	2.07 (0.66)	2.32 (1.00)					0.3
Unknown	n		13	12
Neutrophiles (10+9/L)	mean (SD)	47	4.84 (2.02)	3.73 (1.22)					0.086
Unknown	n		12	10
Platelet (10+9/L)	mean (SD)	52	263 (49)	242 (51)					0.10
Unknown	n		8	9
Mainz Total Score	mean (SD)	69	20 (12)	13 (9)					0.012
Mainz Cardiovascular Score	mean (SD)	69	5.4 (5.8)	6.1 (6.5)					0.8
Mainz General Score	mean (SD)	69	4.47 (3.39)	2.23 (2.29)					0.001
Mainz Neurological Score	mean (SD)	69	5.7 (4.1)	3.0 (3.2)					0.003
Mainz Renal Score	mean (SD)	69	4.7 (6.2)	1.9 (3.3)					0.073
Cornea verticilata		57							<0.001
Present	n / N (%)		26 / 26 (100%)	3 / 31 (9.7%)
Absent	n / N (%)		0 / 26 (0%)	28 / 31 (90%)
Unknown	n		8	4
Kidney Transplant		69							0.11
Present	n / N (%)		3 / 34 (8.8%)	0 / 35 (0%)
Absent	n / N (%)		31 / 34 (91%)	35 / 35 (100%)
Dialysis		68							0.11
Present	n / N (%)		30 / 34 (88%)	34 / 34 (100%)
Absent	n / N (%)		4 / 34 (12%)	0 / 34 (0%)
Unknown	n		0	1
CKD stages		66							0.2
0	n / N (%)		18 / 33 (55%)	18 / 33 (55%)
1	n / N (%)		2 / 33 (6.1%)	3 / 33 (9.1%)
2	n / N (%)		6 / 33 (18%)	9 / 33 (27%)
3	n / N (%)		1 / 33 (3.0%)	3 / 33 (9.1%)
4	n / N (%)		2 / 33 (6.1%)	0 / 33 (0%)
5	n / N (%)		4 / 33 (12%)	0 / 33 (0%)
Unknown	n		1	2
Hypertrophic cardiomyopathy		67							0.3
Present	n / N (%)		14 / 33 (42%)	19 / 34 (56%)
Absent	n / N (%)		19 / 33 (58%)	15 / 34 (44%)
Unknown	n		1	1
Angiokeratoma		66							0.048
Present	n / N (%)		20 / 32 (62%)	12 / 34 (35%)
Absent	n / N (%)		12 / 32 (38%)	22 / 34 (65%)
Unknown	n		2	1
Arterial thrombosis	n / N (%)	65	1 / 31 (3.2%)	2 / 34 (5.9%)					>0.9
Unknown	n		3	1
Venous thrombosis	n / N (%)	66	6 / 32 (19%)	1 / 34 (2.9%)					0.051
Unknown	n		2	1
Cardiac score		69							0.7
0	n / N (%)		21 / 34 (62%)	20 / 35 (57%)
1	n / N (%)		5 / 34 (15%)	3 / 35 (8.6%)
2	n / N (%)		3 / 34 (8.8%)	4 / 35 (11%)
3	n / N (%)		4 / 34 (12%)	4 / 35 (11%)
4	n / N (%)		1 / 34 (2.9%)	4 / 35 (11%)
Unknown	n		0	0
Arrhythmia		69							0.2
Present	n / N (%)		19 / 34 (56%)	14 / 35 (40%)
Absent	n / N (%)		15 / 34 (44%)	21 / 35 (60%)
Unknown	n		0	0
Stroke		67							>0.9
Present	n / N (%)		5 / 32 (16%)	5 / 35 (14%)
Absent	n / N (%)		27 / 32 (84%)	30 / 35 (86%)
Unknown	n		2	0
Mainz stroke		68							>0.9
0	n / N (%)		24 / 33 (73%)	27 / 35 (77%)
3	n / N (%)		4 / 33 (12%)	4 / 35 (11%)
5	n / N (%)		5 / 33 (15%)	4 / 35 (11%)
Unknown	n		1	0
Neuropathic pain		66							<0.001
Present	n / N (%)		31 / 31 (100%)	15 / 35 (43%)
Absent	n / N (%)		0 / 31 (0%)	20 / 35 (57%)
Unknown	n		3	0
Sudation disorder		69							0.008
Present	n / N (%)		24 / 34 (71%)	13 / 35 (37%)
Absent	n / N (%)		10 / 34 (29%)	22 / 35 (63%)
Unknown	n		0	0
1 Statistics presented: mean (SD); n / N (%)
2 Statistical tests performed between classical and non-classical Fabry: Mann-Whitney test for continuous variables; Fisher's exact test for categorical variables
3 Mutations leading to a truncated protein (deletion, frameshift or non-sense mutations)

## Sheet: Table_S3
Protein_1	Protein_2	Spearman coefficient	p_value
CCL13	CCL11	0.78	4.26e-36
CCL17	CCL11	0.78	1.97e-32
CCL2	CCL11	0.8	4.38e-33
CCL22	CCL11	0.67	8.16e-20
CCL26	CCL11	0.62	1.03e-14
CCL3	CCL11	0.69	1.03e-14
CCL4	CCL11	0.71	9.08e-23
CSF2	CCL11	0.43	4.50e-08
CXCL10	CCL11	0.57	4.13e-15
CXCL8	CCL11	0.39	5.10e-06
FGF2	CCL11	0.62	1.11e-18
FLT1	CCL11	-0.05	8.59e-01
ICAM1	CCL11	-0.03	8.20e-01
IFNG	CCL11	0.14	3.73e-01
IL10	CCL11	0.14	1.71e-01
IL12A	CCL11	0.61	2.62e-16
IL12B	CCL11	0.24	4.80e-03
IL13	CCL11	0.38	5.23e-06
IL15	CCL11	0.42	1.23e-09
IL16	CCL11	0.64	1.11e-15
IL17A	CCL11	0.62	2.94e-12
IL1A	CCL11	0.37	9.85e-05
IL1B	CCL11	0.31	7.61e-04
IL2	CCL11	0.12	2.40e-01
IL4	CCL11	0.37	1.76e-04
IL5	CCL11	0.37	1.24e-05
IL6	CCL11	0.04	9.03e-01
IL7	CCL11	0.69	1.05e-22
LTA	CCL11	0.58	5.30e-12
PGF	CCL11	0.59	2.82e-15
TEK	CCL11	0.55	3.59e-11
TNF	CCL11	0.3	2.16e-04
VCAM1	CCL11	0.38	1.58e-04
VEGFA	CCL11	0.69	4.88e-22
VEGFC	CCL11	0.61	5.48e-13
VEGFD	CCL11	0.28	7.58e-05
CCL11	CCL13	0.78	4.26e-36
CCL17	CCL13	0.86	1.98e-54
CCL2	CCL13	0.73	8.09e-27
CCL22	CCL13	0.63	1.28e-16
CCL26	CCL13	0.56	2.45e-11
CCL3	CCL13	0.62	5.07e-12
CCL4	CCL13	0.74	1.46e-28
CSF2	CCL13	0.38	3.08e-07
CXCL10	CCL13	0.57	6.69e-14
CXCL8	CCL13	0.65	1.83e-16
FGF2	CCL13	0.74	9.87e-41
FLT1	CCL13	-0.17	3.61e-02
ICAM1	CCL13	-0.02	5.30e-01
IFNG	CCL13	0.16	1.37e-01
IL10	CCL13	0.15	9.41e-02
IL12A	CCL13	0.55	2.05e-13
IL12B	CCL13	0.14	1.73e-01
IL13	CCL13	0.39	5.06e-07
IL15	CCL13	0.28	1.96e-05
IL16	CCL13	0.68	4.95e-21
IL17A	CCL13	0.5	7.04e-08
IL1A	CCL13	0.43	7.24e-08
IL1B	CCL13	0.48	2.81e-07
IL2	CCL13	0.07	1.73e-01
IL4	CCL13	0.39	2.51e-06
IL5	CCL13	0.28	5.29e-04
IL6	CCL13	0.05	6.12e-01
IL7	CCL13	0.87	9.98e-61
LTA	CCL13	0.56	1.14e-11
PGF	CCL13	0.61	3.72e-18
TEK	CCL13	0.53	2.89e-11
TNF	CCL13	0.24	5.57e-03
VCAM1	CCL13	0.37	1.15e-04
VEGFA	CCL13	0.81	2.16e-42
VEGFC	CCL13	0.77	1.65e-23
VEGFD	CCL13	0.4	9.02e-10
CCL11	CCL17	0.78	1.97e-32
CCL13	CCL17	0.86	1.98e-54
CCL2	CCL17	0.7	1.65e-21
CCL22	CCL17	0.64	2.27e-15
CCL26	CCL17	0.57	9.21e-12
CCL3	CCL17	0.6	1.18e-10
CCL4	CCL17	0.74	1.14e-27
CSF2	CCL17	0.35	1.19e-05
CXCL10	CCL17	0.56	6.03e-12
CXCL8	CCL17	0.64	1.77e-15
FGF2	CCL17	0.78	8.06e-42
FLT1	CCL17	-0.11	1.63e-01
ICAM1	CCL17	-0.01	6.05e-01
IFNG	CCL17	0.21	9.25e-02
IL10	CCL17	0.17	6.15e-02
IL12A	CCL17	0.5	1.39e-10
IL12B	CCL17	0.2	4.37e-02
IL13	CCL17	0.38	2.26e-06
IL15	CCL17	0.32	2.03e-05
IL16	CCL17	0.68	1.12e-19
IL17A	CCL17	0.5	2.45e-07
IL1A	CCL17	0.43	7.31e-07
IL1B	CCL17	0.44	9.67e-07
IL2	CCL17	0.08	4.97e-01
IL4	CCL17	0.38	1.44e-04
IL5	CCL17	0.25	6.82e-03
IL6	CCL17	0.07	3.51e-01
IL7	CCL17	0.88	2.22e-58
LTA	CCL17	0.54	1.15e-09
PGF	CCL17	0.67	4.50e-21
TEK	CCL17	0.51	1.91e-09
TNF	CCL17	0.32	1.61e-04
VCAM1	CCL17	0.45	5.96e-06
VEGFA	CCL17	0.79	7.56e-36
VEGFC	CCL17	0.74	5.24e-20
VEGFD	CCL17	0.33	1.22e-06
CCL11	CCL2	0.8	4.38e-33
CCL13	CCL2	0.73	8.09e-27
CCL17	CCL2	0.7	1.65e-21
CCL22	CCL2	0.72	2.39e-28
CCL26	CCL2	0.66	6.06e-17
CCL3	CCL2	0.75	1.09e-17
CCL4	CCL2	0.79	1.28e-30
CSF2	CCL2	0.53	7.45e-12
CXCL10	CCL2	0.68	1.31e-24
CXCL8	CCL2	0.4	1.03e-03
FGF2	CCL2	0.54	1.48e-11
FLT1	CCL2	-0.12	2.94e-01
ICAM1	CCL2	-0.15	1.15e-01
IFNG	CCL2	0.15	3.57e-01
IL10	CCL2	0.16	1.54e-01
IL12A	CCL2	0.65	1.12e-19
IL12B	CCL2	0.23	9.55e-03
IL13	CCL2	0.43	5.16e-07
IL15	CCL2	0.56	3.77e-19
IL16	CCL2	0.68	5.64e-15
IL17A	CCL2	0.6	4.06e-13
IL1A	CCL2	0.33	2.68e-03
IL1B	CCL2	0.22	3.05e-01
IL2	CCL2	0.15	1.96e-01
IL4	CCL2	0.36	2.02e-03
IL5	CCL2	0.46	1.89e-10
IL6	CCL2	0.11	3.01e-01
IL7	CCL2	0.65	6.69e-16
LTA	CCL2	0.62	1.80e-16
PGF	CCL2	0.46	2.25e-08
TEK	CCL2	0.46	8.23e-08
TNF	CCL2	0.28	8.50e-04
VCAM1	CCL2	0.3	5.51e-03
VEGFA	CCL2	0.64	5.69e-17
VEGFC	CCL2	0.49	1.59e-06
VEGFD	CCL2	0.19	3.68e-02
CCL11	CCL22	0.67	8.16e-20
CCL13	CCL22	0.63	1.28e-16
CCL17	CCL22	0.64	2.27e-15
CCL2	CCL22	0.72	2.39e-28
CCL26	CCL22	0.73	6.90e-22
CCL3	CCL22	0.71	3.35e-15
CCL4	CCL22	0.72	1.26e-24
CSF2	CCL22	0.45	1.91e-10
CXCL10	CCL22	0.69	3.32e-27
CXCL8	CCL22	0.2	1.71e-01
FGF2	CCL22	0.38	1.25e-04
FLT1	CCL22	0.02	4.24e-01
ICAM1	CCL22	-0.16	3.67e-02
IFNG	CCL22	0.17	3.76e-01
IL10	CCL22	0.15	8.64e-02
IL12A	CCL22	0.63	1.56e-19
IL12B	CCL22	0.28	1.78e-03
IL13	CCL22	0.51	5.35e-10
IL15	CCL22	0.59	7.62e-26
IL16	CCL22	0.64	1.04e-15
IL17A	CCL22	0.59	2.53e-14
IL1A	CCL22	0.29	1.71e-02
IL1B	CCL22	0.09	9.03e-01
IL2	CCL22	0.31	4.27e-03
IL4	CCL22	0.4	2.99e-04
IL5	CCL22	0.38	4.15e-09
IL6	CCL22	0.05	6.11e-01
IL7	CCL22	0.6	2.95e-10
LTA	CCL22	0.62	2.46e-19
PGF	CCL22	0.37	1.06e-04
TEK	CCL22	0.47	3.58e-07
TNF	CCL22	0.43	3.73e-07
VCAM1	CCL22	0.26	4.24e-02
VEGFA	CCL22	0.5	8.67e-09
VEGFC	CCL22	0.33	1.27e-02
VEGFD	CCL22	-0.01	3.61e-01
CCL11	CCL26	0.62	1.03e-14
CCL13	CCL26	0.56	2.45e-11
CCL17	CCL26	0.57	9.21e-12
CCL2	CCL26	0.66	6.06e-17
CCL22	CCL26	0.73	6.90e-22
CCL3	CCL26	0.69	3.86e-10
CCL4	CCL26	0.63	1.77e-15
CSF2	CCL26	0.44	5.53e-08
CXCL10	CCL26	0.64	2.08e-14
CXCL8	CCL26	0.13	3.02e-01
FGF2	CCL26	0.34	4.40e-05
FLT1	CCL26	0.06	5.76e-01
ICAM1	CCL26	-0.22	1.62e-02
IFNG	CCL26	0.01	6.43e-01
IL10	CCL26	0.17	4.09e-02
IL12A	CCL26	0.59	6.50e-15
IL12B	CCL26	0.25	1.82e-04
IL13	CCL26	0.49	3.83e-10
IL15	CCL26	0.52	1.52e-17
IL16	CCL26	0.55	4.85e-13
IL17A	CCL26	0.52	7.25e-11
IL1A	CCL26	0.28	3.13e-03
IL1B	CCL26	0.09	4.77e-01
IL2	CCL26	0.26	1.25e-02
IL4	CCL26	0.53	2.59e-06
IL5	CCL26	0.44	7.87e-09
IL6	CCL26	0.03	7.01e-01
IL7	CCL26	0.53	2.68e-09
LTA	CCL26	0.57	2.07e-13
PGF	CCL26	0.38	1.60e-04
TEK	CCL26	0.41	4.60e-08
TNF	CCL26	0.31	1.06e-04
VCAM1	CCL26	0.18	1.81e-01
VEGFA	CCL26	0.46	9.76e-09
VEGFC	CCL26	0.27	1.93e-02
VEGFD	CCL26	-0.1	1.36e-01
CCL11	CCL3	0.69	1.03e-14
CCL13	CCL3	0.62	5.07e-12
CCL17	CCL3	0.6	1.18e-10
CCL2	CCL3	0.75	1.09e-17
CCL22	CCL3	0.71	3.35e-15
CCL26	CCL3	0.69	3.86e-10
CCL4	CCL3	0.74	4.05e-14
CSF2	CCL3	0.56	7.62e-10
CXCL10	CCL3	0.69	3.92e-16
CXCL8	CCL3	0.22	8.92e-02
FGF2	CCL3	0.38	1.10e-04
FLT1	CCL3	0.06	2.50e-01
ICAM1	CCL3	-0.15	8.09e-01
IFNG	CCL3	0.18	4.20e-02
IL10	CCL3	0.19	6.48e-02
IL12A	CCL3	0.69	1.26e-16
IL12B	CCL3	0.35	5.77e-04
IL13	CCL3	0.5	8.83e-07
IL15	CCL3	0.56	4.14e-12
IL16	CCL3	0.7	3.25e-10
IL17A	CCL3	0.64	2.16e-11
IL1A	CCL3	0.23	2.06e-01
IL1B	CCL3	0.13	7.66e-01
IL2	CCL3	0.23	7.83e-02
IL4	CCL3	0.4	1.27e-02
IL5	CCL3	0.48	4.44e-07
IL6	CCL3	0.11	9.24e-02
IL7	CCL3	0.58	2.16e-08
LTA	CCL3	0.67	1.78e-12
PGF	CCL3	0.42	1.07e-05
TEK	CCL3	0.44	6.96e-05
TNF	CCL3	0.41	1.33e-06
VCAM1	CCL3	0.32	4.45e-03
VEGFA	CCL3	0.58	3.20e-09
VEGFC	CCL3	0.35	1.35e-05
VEGFD	CCL3	-0.01	6.07e-01
CCL11	CCL4	0.71	9.08e-23
CCL13	CCL4	0.74	1.46e-28
CCL17	CCL4	0.74	1.14e-27
CCL2	CCL4	0.79	1.28e-30
CCL22	CCL4	0.72	1.26e-24
CCL26	CCL4	0.63	1.77e-15
CCL3	CCL4	0.74	4.05e-14
CSF2	CCL4	0.53	7.70e-12
CXCL10	CCL4	0.67	3.53e-21
CXCL8	CCL4	0.47	9.51e-06
FGF2	CCL4	0.53	8.60e-15
FLT1	CCL4	-0.05	8.33e-01
ICAM1	CCL4	-0.11	2.31e-01
IFNG	CCL4	0.13	3.97e-01
IL10	CCL4	0.2	1.38e-02
IL12A	CCL4	0.57	1.51e-15
IL12B	CCL4	0.2	3.01e-02
IL13	CCL4	0.42	2.50e-08
IL15	CCL4	0.53	4.02e-15
IL16	CCL4	0.67	2.31e-17
IL17A	CCL4	0.53	4.19e-09
IL1A	CCL4	0.38	2.09e-04
IL1B	CCL4	0.23	5.11e-02
IL2	CCL4	0.14	5.20e-01
IL4	CCL4	0.32	4.43e-03
IL5	CCL4	0.42	1.42e-07
IL6	CCL4	0.05	6.36e-01
IL7	CCL4	0.73	2.00e-25
LTA	CCL4	0.6	1.16e-14
PGF	CCL4	0.46	2.05e-08
TEK	CCL4	0.48	5.70e-09
TNF	CCL4	0.26	7.23e-04
VCAM1	CCL4	0.39	8.62e-05
VEGFA	CCL4	0.68	1.63e-21
VEGFC	CCL4	0.52	2.12e-07
VEGFD	CCL4	0.16	7.22e-02
CCL11	CSF2	0.43	4.50e-08
CCL13	CSF2	0.38	3.08e-07
CCL17	CSF2	0.35	1.19e-05
CCL2	CSF2	0.53	7.45e-12
CCL22	CSF2	0.45	1.91e-10
CCL26	CSF2	0.44	5.53e-08
CCL3	CSF2	0.56	7.62e-10
CCL4	CSF2	0.53	7.70e-12
CXCL10	CSF2	0.42	1.94e-08
CXCL8	CSF2	0.05	9.87e-01
FGF2	CSF2	0.2	6.53e-02
FLT1	CSF2	-0.14	2.79e-01
ICAM1	CSF2	-0.09	2.16e-01
IFNG	CSF2	0.16	1.90e-01
IL10	CSF2	0.06	9.97e-01
IL12A	CSF2	0.48	1.04e-11
IL12B	CSF2	0.26	2.23e-03
IL13	CSF2	0.29	3.53e-05
IL15	CSF2	0.43	8.56e-13
IL16	CSF2	0.44	2.36e-05
IL17A	CSF2	0.49	6.02e-09
IL1A	CSF2	0.16	3.09e-01
IL1B	CSF2	0.02	8.98e-01
IL2	CSF2	0.14	5.85e-02
IL4	CSF2	0.25	4.47e-02
IL5	CSF2	0.4	7.85e-09
IL6	CSF2	0.03	9.75e-01
IL7	CSF2	0.34	4.58e-05
LTA	CSF2	0.65	2.81e-25
PGF	CSF2	0.18	1.35e-01
TEK	CSF2	0.23	6.54e-03
TNF	CSF2	0.06	5.47e-01
VCAM1	CSF2	0.2	1.03e-01
VEGFA	CSF2	0.41	4.66e-07
VEGFC	CSF2	0.24	1.49e-02
VEGFD	CSF2	-0.03	5.26e-01
CCL11	CXCL10	0.57	4.13e-15
CCL13	CXCL10	0.57	6.69e-14
CCL17	CXCL10	0.56	6.03e-12
CCL2	CXCL10	0.68	1.31e-24
CCL22	CXCL10	0.69	3.32e-27
CCL26	CXCL10	0.64	2.08e-14
CCL3	CXCL10	0.69	3.92e-16
CCL4	CXCL10	0.67	3.53e-21
CSF2	CXCL10	0.42	1.94e-08
CXCL8	CXCL10	0.25	3.93e-02
FGF2	CXCL10	0.37	1.53e-05
FLT1	CXCL10	0.15	1.48e-02
ICAM1	CXCL10	-0.08	5.39e-01
IFNG	CXCL10	0.33	3.67e-03
IL10	CXCL10	0.24	1.48e-02
IL12A	CXCL10	0.68	8.60e-22
IL12B	CXCL10	0.2	3.68e-02
IL13	CXCL10	0.42	5.83e-07
IL15	CXCL10	0.5	1.20e-14
IL16	CXCL10	0.57	7.60e-12
IL17A	CXCL10	0.58	1.31e-12
IL1A	CXCL10	0.16	4.81e-02
IL1B	CXCL10	0.12	5.71e-01
IL2	CXCL10	0.23	1.72e-02
IL4	CXCL10	0.44	4.05e-05
IL5	CXCL10	0.32	1.81e-06
IL6	CXCL10	0.23	1.10e-02
IL7	CXCL10	0.55	1.41e-09
LTA	CXCL10	0.58	7.66e-14
PGF	CXCL10	0.46	2.36e-08
TEK	CXCL10	0.44	2.62e-07
TNF	CXCL10	0.48	6.37e-09
VCAM1	CXCL10	0.42	6.94e-06
VEGFA	CXCL10	0.5	1.94e-09
VEGFC	CXCL10	0.3	7.53e-03
VEGFD	CXCL10	-0.04	5.87e-01
CCL11	CXCL8	0.39	5.10e-06
CCL13	CXCL8	0.65	1.83e-16
CCL17	CXCL8	0.64	1.77e-15
CCL2	CXCL8	0.4	1.03e-03
CCL22	CXCL8	0.2	1.71e-01
CCL26	CXCL8	0.13	3.02e-01
CCL3	CXCL8	0.22	8.92e-02
CCL4	CXCL8	0.47	9.51e-06
CSF2	CXCL8	0.05	9.87e-01
CXCL10	CXCL8	0.25	3.93e-02
FGF2	CXCL8	0.67	3.33e-20
FLT1	CXCL8	-0.28	2.06e-03
ICAM1	CXCL8	0.06	7.58e-01
IFNG	CXCL8	0.26	1.21e-02
IL10	CXCL8	0.09	9.37e-01
IL12A	CXCL8	0.14	2.96e-01
IL12B	CXCL8	-0.01	8.03e-01
IL13	CXCL8	0.12	6.80e-04
IL15	CXCL8	-0.05	1.20e-01
IL16	CXCL8	0.43	1.36e-13
IL17A	CXCL8	0.07	9.51e-01
IL1A	CXCL8	0.37	2.13e-05
IL1B	CXCL8	0.56	2.37e-32
IL2	CXCL8	-0.04	1.12e-01
IL4	CXCL8	0.23	2.85e-07
IL5	CXCL8	0.02	3.11e-01
IL6	CXCL8	0.04	8.46e-01
IL7	CXCL8	0.69	7.06e-20
LTA	CXCL8	0.23	2.27e-01
PGF	CXCL8	0.6	1.27e-14
TEK	CXCL8	0.25	1.80e-03
TNF	CXCL8	0.2	4.19e-03
VCAM1	CXCL8	0.37	5.10e-04
VEGFA	CXCL8	0.61	2.63e-15
VEGFC	CXCL8	0.68	4.43e-14
VEGFD	CXCL8	0.58	2.06e-14
CCL11	FGF2	0.62	1.11e-18
CCL13	FGF2	0.74	9.87e-41
CCL17	FGF2	0.78	8.06e-42
CCL2	FGF2	0.54	1.48e-11
CCL22	FGF2	0.38	1.25e-04
CCL26	FGF2	0.34	4.40e-05
CCL3	FGF2	0.38	1.10e-04
CCL4	FGF2	0.53	8.60e-15
CSF2	FGF2	0.2	6.53e-02
CXCL10	FGF2	0.37	1.53e-05
CXCL8	FGF2	0.67	3.33e-20
FLT1	FGF2	-0.13	3.40e-02
ICAM1	FGF2	0.15	3.66e-01
IFNG	FGF2	0.26	9.48e-02
IL10	FGF2	0.15	1.30e-01
IL12A	FGF2	0.4	7.48e-06
IL12B	FGF2	0.08	2.87e-01
IL13	FGF2	0.24	1.85e-03
IL15	FGF2	0.04	5.97e-01
IL16	FGF2	0.54	8.10e-13
IL17A	FGF2	0.35	4.01e-03
IL1A	FGF2	0.51	3.01e-09
IL1B	FGF2	0.56	9.93e-10
IL2	FGF2	-0.05	6.37e-01
IL4	FGF2	0.31	4.33e-04
IL5	FGF2	0.12	5.08e-01
IL6	FGF2	0.09	3.50e-01
IL7	FGF2	0.76	2.73e-52
LTA	FGF2	0.33	2.71e-03
PGF	FGF2	0.7	1.39e-25
TEK	FGF2	0.42	1.33e-07
TNF	FGF2	0.16	3.98e-02
VCAM1	FGF2	0.49	3.65e-07
VEGFA	FGF2	0.78	7.31e-38
VEGFC	FGF2	0.81	2.52e-28
VEGFD	FGF2	0.52	5.06e-17
CCL11	FLT1	-0.05	8.59e-01
CCL13	FLT1	-0.17	3.61e-02
CCL17	FLT1	-0.11	1.63e-01
CCL2	FLT1	-0.12	2.94e-01
CCL22	FLT1	0.02	4.24e-01
CCL26	FLT1	0.06	5.76e-01
CCL3	FLT1	0.06	2.50e-01
CCL4	FLT1	-0.05	8.33e-01
CSF2	FLT1	-0.14	2.79e-01
CXCL10	FLT1	0.15	1.48e-02
CXCL8	FLT1	-0.28	2.06e-03
FGF2	FLT1	-0.13	3.40e-02
ICAM1	FLT1	0.18	1.65e-02
IFNG	FLT1	-0.11	1.73e-01
IL10	FLT1	0.06	6.10e-01
IL12A	FLT1	0.02	4.92e-01
IL12B	FLT1	0.04	6.35e-01
IL13	FLT1	0.01	8.97e-01
IL15	FLT1	-0.01	7.86e-01
IL16	FLT1	-0.07	5.56e-01
IL17A	FLT1	0.07	3.49e-01
IL1A	FLT1	-0.1	4.75e-01
IL1B	FLT1	-0.17	7.24e-02
IL2	FLT1	0.15	3.15e-01
IL4	FLT1	0.02	6.18e-01
IL5	FLT1	-0.02	9.31e-01
IL6	FLT1	0.1	7.33e-01
IL7	FLT1	-0.14	2.41e-02
LTA	FLT1	-0.16	3.05e-01
PGF	FLT1	-0.02	9.96e-01
TEK	FLT1	0.16	4.99e-03
TNF	FLT1	0.17	2.72e-02
VCAM1	FLT1	0.14	6.00e-03
VEGFA	FLT1	-0.2	9.39e-03
VEGFC	FLT1	-0.23	1.51e-02
VEGFD	FLT1	-0.32	6.00e-05
CCL11	ICAM1	-0.03	8.20e-01
CCL13	ICAM1	-0.02	5.30e-01
CCL17	ICAM1	-0.01	6.05e-01
CCL2	ICAM1	-0.15	1.15e-01
CCL22	ICAM1	-0.16	3.67e-02
CCL26	ICAM1	-0.22	1.62e-02
CCL3	ICAM1	-0.15	8.09e-01
CCL4	ICAM1	-0.11	2.31e-01
CSF2	ICAM1	-0.09	2.16e-01
CXCL10	ICAM1	-0.08	5.39e-01
CXCL8	ICAM1	0.06	7.58e-01
FGF2	ICAM1	0.15	3.66e-01
FLT1	ICAM1	0.18	1.65e-02
IFNG	ICAM1	0.25	1.12e-02
IL10	ICAM1	0.09	4.80e-01
IL12A	ICAM1	-0.17	4.12e-02
IL12B	ICAM1	-0.04	8.29e-01
IL13	ICAM1	-0.3	3.40e-03
IL15	ICAM1	-0.29	1.31e-03
IL16	ICAM1	-0.2	2.65e-02
IL17A	ICAM1	-0.15	6.10e-02
IL1A	ICAM1	-0.03	8.46e-02
IL1B	ICAM1	0.09	5.27e-01
IL2	ICAM1	-0.09	9.04e-01
IL4	ICAM1	-0.07	2.93e-01
IL5	ICAM1	-0.04	4.88e-01
IL6	ICAM1	0.34	6.75e-05
IL7	ICAM1	-0.05	5.08e-01
LTA	ICAM1	-0.13	2.95e-02
PGF	ICAM1	0.18	4.14e-02
TEK	ICAM1	0.01	9.10e-01
TNF	ICAM1	-0.06	6.42e-01
VCAM1	ICAM1	0.57	1.73e-19
VEGFA	ICAM1	-0.07	1.49e-01
VEGFC	ICAM1	0.15	1.79e-01
VEGFD	ICAM1	0.38	4.00e-04
CCL11	IFNG	0.14	3.73e-01
CCL13	IFNG	0.16	1.37e-01
CCL17	IFNG	0.21	9.25e-02
CCL2	IFNG	0.15	3.57e-01
CCL22	IFNG	0.17	3.76e-01
CCL26	IFNG	0.01	6.43e-01
CCL3	IFNG	0.18	4.20e-02
CCL4	IFNG	0.13	3.97e-01
CSF2	IFNG	0.16	1.90e-01
CXCL10	IFNG	0.33	3.67e-03
CXCL8	IFNG	0.26	1.21e-02
FGF2	IFNG	0.26	9.48e-02
FLT1	IFNG	-0.11	1.73e-01
ICAM1	IFNG	0.25	1.12e-02
IL10	IFNG	0.24	2.44e-03
IL12A	IFNG	0.26	2.11e-02
IL12B	IFNG	0.17	1.54e-01
IL13	IFNG	0.03	4.61e-01
IL15	IFNG	0.16	2.15e-01
IL16	IFNG	0.17	4.82e-01
IL17A	IFNG	0.2	2.36e-01
IL1A	IFNG	0.01	6.89e-01
IL1B	IFNG	0.16	1.30e-01
IL2	IFNG	0.07	2.93e-01
IL4	IFNG	0.14	1.86e-01
IL5	IFNG	0.05	2.81e-01
IL6	IFNG	0.28	2.99e-03
IL7	IFNG	0.22	7.00e-02
LTA	IFNG	0.33	8.66e-04
PGF	IFNG	0.36	2.60e-04
TEK	IFNG	0.05	5.57e-01
TNF	IFNG	0.27	4.00e-03
VCAM1	IFNG	0.36	1.67e-04
VEGFA	IFNG	0.22	4.46e-02
VEGFC	IFNG	0.24	2.95e-02
VEGFD	IFNG	0.24	3.25e-02
CCL11	IL10	0.14	1.71e-01
CCL13	IL10	0.15	9.41e-02
CCL17	IL10	0.17	6.15e-02
CCL2	IL10	0.16	1.54e-01
CCL22	IL10	0.15	8.64e-02
CCL26	IL10	0.17	4.09e-02
CCL3	IL10	0.19	6.48e-02
CCL4	IL10	0.2	1.38e-02
CSF2	IL10	0.06	9.97e-01
CXCL10	IL10	0.24	1.48e-02
CXCL8	IL10	0.09	9.37e-01
FGF2	IL10	0.15	1.30e-01
FLT1	IL10	0.06	6.10e-01
ICAM1	IL10	0.09	4.80e-01
IFNG	IL10	0.24	2.44e-03
IL12A	IL10	0.14	1.45e-01
IL12B	IL10	0.26	1.55e-03
IL13	IL10	0.06	4.62e-01
IL15	IL10	0.28	2.66e-02
IL16	IL10	-0.01	6.61e-01
IL17A	IL10	0.17	8.89e-02
IL1A	IL10	0.07	7.40e-01
IL1B	IL10	-0.05	2.61e-01
IL2	IL10	0.18	1.74e-01
IL4	IL10	0.11	5.78e-01
IL5	IL10	0.12	2.82e-01
IL6	IL10	0.2	2.97e-02
IL7	IL10	0.18	6.23e-02
LTA	IL10	0.2	1.44e-01
PGF	IL10	0.13	2.52e-01
TEK	IL10	0.09	2.12e-01
TNF	IL10	0.21	2.59e-02
VCAM1	IL10	0.08	3.91e-01
VEGFA	IL10	0.12	3.09e-01
VEGFC	IL10	0.04	5.40e-01
VEGFD	IL10	0	8.26e-01
CCL11	IL12A	0.61	2.62e-16
CCL13	IL12A	0.55	2.05e-13
CCL17	IL12A	0.5	1.39e-10
CCL2	IL12A	0.65	1.12e-19
CCL22	IL12A	0.63	1.56e-19
CCL26	IL12A	0.59	6.50e-15
CCL3	IL12A	0.69	1.26e-16
CCL4	IL12A	0.57	1.51e-15
CSF2	IL12A	0.48	1.04e-11
CXCL10	IL12A	0.68	8.60e-22
CXCL8	IL12A	0.14	2.96e-01
FGF2	IL12A	0.4	7.48e-06
FLT1	IL12A	0.02	4.92e-01
ICAM1	IL12A	-0.17	4.12e-02
IFNG	IL12A	0.26	2.11e-02
IL10	IL12A	0.14	1.45e-01
IL12B	IL12A	0.3	2.00e-04
IL13	IL12A	0.48	5.94e-09
IL15	IL12A	0.48	2.51e-18
IL16	IL12A	0.64	1.20e-14
IL17A	IL12A	0.81	6.85e-30
IL1A	IL12A	0.27	4.81e-03
IL1B	IL12A	0.09	4.37e-01
IL2	IL12A	0.25	4.86e-02
IL4	IL12A	0.38	1.16e-03
IL5	IL12A	0.32	2.37e-06
IL6	IL12A	0.11	3.73e-01
IL7	IL12A	0.52	2.12e-10
LTA	IL12A	0.62	1.15e-19
PGF	IL12A	0.38	8.06e-06
TEK	IL12A	0.52	1.67e-09
TNF	IL12A	0.44	3.76e-09
VCAM1	IL12A	0.29	4.67e-03
VEGFA	IL12A	0.54	5.87e-13
VEGFC	IL12A	0.37	5.77e-05
VEGFD	IL12A	-0.09	2.82e-01
CCL11	IL12B	0.24	4.80e-03
CCL13	IL12B	0.14	1.73e-01
CCL17	IL12B	0.2	4.37e-02
CCL2	IL12B	0.23	9.55e-03
CCL22	IL12B	0.28	1.78e-03
CCL26	IL12B	0.25	1.82e-04
CCL3	IL12B	0.35	5.77e-04
CCL4	IL12B	0.2	3.01e-02
CSF2	IL12B	0.26	2.23e-03
CXCL10	IL12B	0.2	3.68e-02
CXCL8	IL12B	-0.01	8.03e-01
FGF2	IL12B	0.08	2.87e-01
FLT1	IL12B	0.04	6.35e-01
ICAM1	IL12B	-0.04	8.29e-01
IFNG	IL12B	0.17	1.54e-01
IL10	IL12B	0.26	1.55e-03
IL12A	IL12B	0.3	2.00e-04
IL13	IL12B	0.38	7.06e-07
IL15	IL12B	0.22	2.57e-03
IL16	IL12B	0.33	4.79e-03
IL17A	IL12B	0.3	3.76e-04
IL1A	IL12B	0.03	7.61e-01
IL1B	IL12B	0.02	5.80e-01
IL2	IL12B	0.44	3.51e-07
IL4	IL12B	0.24	1.19e-03
IL5	IL12B	0.16	8.46e-03
IL6	IL12B	0.01	9.73e-01
IL7	IL12B	0.18	2.06e-01
LTA	IL12B	0.34	6.77e-05
PGF	IL12B	0.07	2.19e-01
TEK	IL12B	0.21	7.89e-03
TNF	IL12B	0.37	2.39e-05
VCAM1	IL12B	0.14	3.71e-02
VEGFA	IL12B	0.24	2.11e-02
VEGFC	IL12B	0.02	6.88e-01
VEGFD	IL12B	-0.09	9.10e-01
CCL11	IL13	0.38	5.23e-06
CCL13	IL13	0.39	5.06e-07
CCL17	IL13	0.38	2.26e-06
CCL2	IL13	0.43	5.16e-07
CCL22	IL13	0.51	5.35e-10
CCL26	IL13	0.49	3.83e-10
CCL3	IL13	0.5	8.83e-07
CCL4	IL13	0.42	2.50e-08
CSF2	IL13	0.29	3.53e-05
CXCL10	IL13	0.42	5.83e-07
CXCL8	IL13	0.12	6.80e-04
FGF2	IL13	0.24	1.85e-03
FLT1	IL13	0.01	8.97e-01
ICAM1	IL13	-0.3	3.40e-03
IFNG	IL13	0.03	4.61e-01
IL10	IL13	0.06	4.62e-01
IL12A	IL13	0.48	5.94e-09
IL12B	IL13	0.38	7.06e-07
IL15	IL13	0.31	1.40e-06
IL16	IL13	0.51	8.62e-15
IL17A	IL13	0.39	7.32e-05
IL1A	IL13	0.28	1.90e-04
IL1B	IL13	0.08	2.83e-05
IL2	IL13	0.37	1.39e-06
IL4	IL13	0.38	2.35e-08
IL5	IL13	0.26	6.58e-04
IL6	IL13	-0.2	1.80e-02
IL7	IL13	0.37	7.55e-06
LTA	IL13	0.39	1.43e-08
PGF	IL13	0.21	6.21e-03
TEK	IL13	0.31	4.68e-04
TNF	IL13	0.43	1.23e-05
VCAM1	IL13	0.12	2.73e-01
VEGFA	IL13	0.44	1.80e-08
VEGFC	IL13	0.14	2.35e-01
VEGFD	IL13	-0.16	3.03e-01
CCL11	IL15	0.42	1.23e-09
CCL13	IL15	0.28	1.96e-05
CCL17	IL15	0.32	2.03e-05
CCL2	IL15	0.56	3.77e-19
CCL22	IL15	0.59	7.62e-26
CCL26	IL15	0.52	1.52e-17
CCL3	IL15	0.56	4.14e-12
CCL4	IL15	0.53	4.02e-15
CSF2	IL15	0.43	8.56e-13
CXCL10	IL15	0.5	1.20e-14
CXCL8	IL15	-0.05	1.20e-01
FGF2	IL15	0.04	5.97e-01
FLT1	IL15	-0.01	7.86e-01
ICAM1	IL15	-0.29	1.31e-03
IFNG	IL15	0.16	2.15e-01
IL10	IL15	0.28	2.66e-02
IL12A	IL15	0.48	2.51e-18
IL12B	IL15	0.22	2.57e-03
IL13	IL15	0.31	1.40e-06
IL16	IL15	0.37	4.47e-09
IL17A	IL15	0.48	1.65e-15
IL1A	IL15	0.03	4.30e-01
IL1B	IL15	-0.23	3.60e-02
IL2	IL15	0.25	3.78e-02
IL4	IL15	0.17	2.62e-01
IL5	IL15	0.47	2.17e-14
IL6	IL15	0.06	8.61e-01
IL7	IL15	0.29	1.25e-03
LTA	IL15	0.56	1.88e-23
PGF	IL15	0.05	4.61e-01
TEK	IL15	0.13	3.33e-03
TNF	IL15	0.22	3.42e-04
VCAM1	IL15	0.05	7.49e-01
VEGFA	IL15	0.24	1.54e-04
VEGFC	IL15	-0.05	4.67e-01
VEGFD	IL15	-0.27	7.26e-05
CCL11	IL16	0.64	1.11e-15
CCL13	IL16	0.68	4.95e-21
CCL17	IL16	0.68	1.12e-19
CCL2	IL16	0.68	5.64e-15
CCL22	IL16	0.64	1.04e-15
CCL26	IL16	0.55	4.85e-13
CCL3	IL16	0.7	3.25e-10
CCL4	IL16	0.67	2.31e-17
CSF2	IL16	0.44	2.36e-05
CXCL10	IL16	0.57	7.60e-12
CXCL8	IL16	0.43	1.36e-13
FGF2	IL16	0.54	8.10e-13
FLT1	IL16	-0.07	5.56e-01
ICAM1	IL16	-0.2	2.65e-02
IFNG	IL16	0.17	4.82e-01
IL10	IL16	-0.01	6.61e-01
IL12A	IL16	0.64	1.20e-14
IL12B	IL16	0.33	4.79e-03
IL13	IL16	0.51	8.62e-15
IL15	IL16	0.37	4.47e-09
IL17A	IL16	0.59	2.44e-10
IL1A	IL16	0.34	1.85e-05
IL1B	IL16	0.43	2.57e-14
IL2	IL16	0.22	2.29e-02
IL4	IL16	0.48	1.28e-10
IL5	IL16	0.31	2.90e-04
IL6	IL16	-0.01	6.05e-01
IL7	IL16	0.67	6.11e-19
LTA	IL16	0.61	2.86e-12
PGF	IL16	0.5	7.46e-11
TEK	IL16	0.52	8.57e-09
TNF	IL16	0.37	3.31e-06
VCAM1	IL16	0.3	2.03e-02
VEGFA	IL16	0.71	5.23e-22
VEGFC	IL16	0.51	2.03e-07
VEGFD	IL16	0.09	2.88e-01
CCL11	IL17A	0.62	2.94e-12
CCL13	IL17A	0.5	7.04e-08
CCL17	IL17A	0.5	2.45e-07
CCL2	IL17A	0.6	4.06e-13
CCL22	IL17A	0.59	2.53e-14
CCL26	IL17A	0.52	7.25e-11
CCL3	IL17A	0.64	2.16e-11
CCL4	IL17A	0.53	4.19e-09
CSF2	IL17A	0.49	6.02e-09
CXCL10	IL17A	0.58	1.31e-12
CXCL8	IL17A	0.07	9.51e-01
FGF2	IL17A	0.35	4.01e-03
FLT1	IL17A	0.07	3.49e-01
ICAM1	IL17A	-0.15	6.10e-02
IFNG	IL17A	0.2	2.36e-01
IL10	IL17A	0.17	8.89e-02
IL12A	IL17A	0.81	6.85e-30
IL12B	IL17A	0.3	3.76e-04
IL13	IL17A	0.39	7.32e-05
IL15	IL17A	0.48	1.65e-15
IL16	IL17A	0.59	2.44e-10
IL1A	IL17A	0.29	6.02e-03
IL1B	IL17A	0.11	6.36e-01
IL2	IL17A	0.26	1.93e-02
IL4	IL17A	0.36	5.54e-03
IL5	IL17A	0.36	2.39e-06
IL6	IL17A	0.11	5.18e-01
IL7	IL17A	0.47	3.09e-05
LTA	IL17A	0.58	1.11e-11
PGF	IL17A	0.29	8.13e-03
TEK	IL17A	0.47	4.06e-06
TNF	IL17A	0.38	1.35e-06
VCAM1	IL17A	0.17	3.22e-01
VEGFA	IL17A	0.52	7.59e-08
VEGFC	IL17A	0.31	3.46e-02
VEGFD	IL17A	-0.08	5.01e-02
CCL11	IL1A	0.37	9.85e-05
CCL13	IL1A	0.43	7.24e-08
CCL17	IL1A	0.43	7.31e-07
CCL2	IL1A	0.33	2.68e-03
CCL22	IL1A	0.29	1.71e-02
CCL26	IL1A	0.28	3.13e-03
CCL3	IL1A	0.23	2.06e-01
CCL4	IL1A	0.38	2.09e-04
CSF2	IL1A	0.16	3.09e-01
CXCL10	IL1A	0.16	4.81e-02
CXCL8	IL1A	0.37	2.13e-05
FGF2	IL1A	0.51	3.01e-09
FLT1	IL1A	-0.1	4.75e-01
ICAM1	IL1A	-0.03	8.46e-02
IFNG	IL1A	0.01	6.89e-01
IL10	IL1A	0.07	7.40e-01
IL12A	IL1A	0.27	4.81e-03
IL12B	IL1A	0.03	7.61e-01
IL13	IL1A	0.28	1.90e-04
IL15	IL1A	0.03	4.30e-01
IL16	IL1A	0.34	1.85e-05
IL17A	IL1A	0.29	6.02e-03
IL1B	IL1A	0.33	1.37e-03
IL2	IL1A	0.18	2.41e-03
IL4	IL1A	0.24	2.57e-03
IL5	IL1A	0.01	8.05e-01
IL6	IL1A	-0.04	7.19e-01
IL7	IL1A	0.47	1.94e-08
LTA	IL1A	0.27	2.31e-02
PGF	IL1A	0.36	1.36e-04
TEK	IL1A	0.28	2.04e-02
TNF	IL1A	0.13	1.08e-01
VCAM1	IL1A	0.15	3.26e-01
VEGFA	IL1A	0.51	8.08e-10
VEGFC	IL1A	0.48	2.38e-04
VEGFD	IL1A	0.3	3.37e-03
CCL11	IL1B	0.31	7.61e-04
CCL13	IL1B	0.48	2.81e-07
CCL17	IL1B	0.44	9.67e-07
CCL2	IL1B	0.22	3.05e-01
CCL22	IL1B	0.09	9.03e-01
CCL26	IL1B	0.09	4.77e-01
CCL3	IL1B	0.13	7.66e-01
CCL4	IL1B	0.23	5.11e-02
CSF2	IL1B	0.02	8.98e-01
CXCL10	IL1B	0.12	5.71e-01
CXCL8	IL1B	0.56	2.37e-32
FGF2	IL1B	0.56	9.93e-10
FLT1	IL1B	-0.17	7.24e-02
ICAM1	IL1B	0.09	5.27e-01
IFNG	IL1B	0.16	1.30e-01
IL10	IL1B	-0.05	2.61e-01
IL12A	IL1B	0.09	4.37e-01
IL12B	IL1B	0.02	5.80e-01
IL13	IL1B	0.08	2.83e-05
IL15	IL1B	-0.23	3.60e-02
IL16	IL1B	0.43	2.57e-14
IL17A	IL1B	0.11	6.36e-01
IL1A	IL1B	0.33	1.37e-03
IL2	IL1B	0.02	4.79e-02
IL4	IL1B	0.28	5.80e-08
IL5	IL1B	-0.09	1.97e-01
IL6	IL1B	0.11	9.86e-01
IL7	IL1B	0.47	2.52e-08
LTA	IL1B	0.1	8.55e-01
PGF	IL1B	0.44	1.72e-08
TEK	IL1B	0.21	1.31e-02
TNF	IL1B	0.02	3.75e-02
VCAM1	IL1B	0.13	1.15e-01
VEGFA	IL1B	0.55	4.00e-10
VEGFC	IL1B	0.59	3.75e-08
VEGFD	IL1B	0.44	5.65e-08
CCL11	IL2	0.12	2.40e-01
CCL13	IL2	0.07	1.73e-01
CCL17	IL2	0.08	4.97e-01
CCL2	IL2	0.15	1.96e-01
CCL22	IL2	0.31	4.27e-03
CCL26	IL2	0.26	1.25e-02
CCL3	IL2	0.23	7.83e-02
CCL4	IL2	0.14	5.20e-01
CSF2	IL2	0.14	5.85e-02
CXCL10	IL2	0.23	1.72e-02
CXCL8	IL2	-0.04	1.12e-01
FGF2	IL2	-0.05	6.37e-01
FLT1	IL2	0.15	3.15e-01
ICAM1	IL2	-0.09	9.04e-01
IFNG	IL2	0.07	2.93e-01
IL10	IL2	0.18	1.74e-01
IL12A	IL2	0.25	4.86e-02
IL12B	IL2	0.44	3.51e-07
IL13	IL2	0.37	1.39e-06
IL15	IL2	0.25	3.78e-02
IL16	IL2	0.22	2.29e-02
IL17A	IL2	0.26	1.93e-02
IL1A	IL2	0.18	2.41e-03
IL1B	IL2	0.02	4.79e-02
IL4	IL2	0.35	3.85e-05
IL5	IL2	0.07	4.61e-02
IL6	IL2	-0.03	9.67e-01
IL7	IL2	0.07	7.85e-01
LTA	IL2	0.29	7.84e-04
PGF	IL2	-0.02	8.96e-01
TEK	IL2	0.25	2.34e-02
TNF	IL2	0.37	1.97e-03
VCAM1	IL2	0.01	4.48e-01
VEGFA	IL2	0.07	5.11e-01
VEGFC	IL2	-0.04	5.77e-01
VEGFD	IL2	-0.14	7.83e-01
CCL11	IL4	0.37	1.76e-04
CCL13	IL4	0.39	2.51e-06
CCL17	IL4	0.38	1.44e-04
CCL2	IL4	0.36	2.02e-03
CCL22	IL4	0.4	2.99e-04
CCL26	IL4	0.53	2.59e-06
CCL3	IL4	0.4	1.27e-02
CCL4	IL4	0.32	4.43e-03
CSF2	IL4	0.25	4.47e-02
CXCL10	IL4	0.44	4.05e-05
CXCL8	IL4	0.23	2.85e-07
FGF2	IL4	0.31	4.33e-04
FLT1	IL4	0.02	6.18e-01
ICAM1	IL4	-0.07	2.93e-01
IFNG	IL4	0.14	1.86e-01
IL10	IL4	0.11	5.78e-01
IL12A	IL4	0.38	1.16e-03
IL12B	IL4	0.24	1.19e-03
IL13	IL4	0.38	2.35e-08
IL15	IL4	0.17	2.62e-01
IL16	IL4	0.48	1.28e-10
IL17A	IL4	0.36	5.54e-03
IL1A	IL4	0.24	2.57e-03
IL1B	IL4	0.28	5.80e-08
IL2	IL4	0.35	3.85e-05
IL5	IL4	0.12	3.36e-01
IL6	IL4	0.05	6.56e-01
IL7	IL4	0.39	3.30e-05
LTA	IL4	0.35	2.28e-03
PGF	IL4	0.44	5.76e-08
TEK	IL4	0.36	8.63e-05
TNF	IL4	0.38	6.90e-06
VCAM1	IL4	0.18	1.23e-01
VEGFA	IL4	0.43	2.20e-06
VEGFC	IL4	0.33	3.86e-04
VEGFD	IL4	0.12	7.99e-03
CCL11	IL5	0.37	1.24e-05
CCL13	IL5	0.28	5.29e-04
CCL17	IL5	0.25	6.82e-03
CCL2	IL5	0.46	1.89e-10
CCL22	IL5	0.38	4.15e-09
CCL26	IL5	0.44	7.87e-09
CCL3	IL5	0.48	4.44e-07
CCL4	IL5	0.42	1.42e-07
CSF2	IL5	0.4	7.85e-09
CXCL10	IL5	0.32	1.81e-06
CXCL8	IL5	0.02	3.11e-01
FGF2	IL5	0.12	5.08e-01
FLT1	IL5	-0.02	9.31e-01
ICAM1	IL5	-0.04	4.88e-01
IFNG	IL5	0.05	2.81e-01
IL10	IL5	0.12	2.82e-01
IL12A	IL5	0.32	2.37e-06
IL12B	IL5	0.16	8.46e-03
IL13	IL5	0.26	6.58e-04
IL15	IL5	0.47	2.17e-14
IL16	IL5	0.31	2.90e-04
IL17A	IL5	0.36	2.39e-06
IL1A	IL5	0.01	8.05e-01
IL1B	IL5	-0.09	1.97e-01
IL2	IL5	0.07	4.61e-02
IL4	IL5	0.12	3.36e-01
IL6	IL5	0.04	8.07e-01
IL7	IL5	0.25	3.85e-02
LTA	IL5	0.49	1.53e-14
PGF	IL5	0.06	5.46e-01
TEK	IL5	0.12	2.30e-02
TNF	IL5	0.13	1.41e-02
VCAM1	IL5	0.1	6.83e-01
VEGFA	IL5	0.27	6.99e-04
VEGFC	IL5	0.09	2.27e-01
VEGFD	IL5	-0.04	2.69e-01
CCL11	IL6	0.04	9.03e-01
CCL13	IL6	0.05	6.12e-01
CCL17	IL6	0.07	3.51e-01
CCL2	IL6	0.11	3.01e-01
CCL22	IL6	0.05	6.11e-01
CCL26	IL6	0.03	7.01e-01
CCL3	IL6	0.11	9.24e-02
CCL4	IL6	0.05	6.36e-01
CSF2	IL6	0.03	9.75e-01
CXCL10	IL6	0.23	1.10e-02
CXCL8	IL6	0.04	8.46e-01
FGF2	IL6	0.09	3.50e-01
FLT1	IL6	0.1	7.33e-01
ICAM1	IL6	0.34	6.75e-05
IFNG	IL6	0.28	2.99e-03
IL10	IL6	0.2	2.97e-02
IL12A	IL6	0.11	3.73e-01
IL12B	IL6	0.01	9.73e-01
IL13	IL6	-0.2	1.80e-02
IL15	IL6	0.06	8.61e-01
IL16	IL6	-0.01	6.05e-01
IL17A	IL6	0.11	5.18e-01
IL1A	IL6	-0.04	7.19e-01
IL1B	IL6	0.11	9.86e-01
IL2	IL6	-0.03	9.67e-01
IL4	IL6	0.05	6.56e-01
IL5	IL6	0.04	8.07e-01
IL7	IL6	-0.01	8.71e-01
LTA	IL6	0.05	8.87e-01
PGF	IL6	0.18	1.28e-02
TEK	IL6	-0.05	2.98e-01
TNF	IL6	0.14	1.09e-01
VCAM1	IL6	0.16	7.48e-03
VEGFA	IL6	0.01	7.39e-01
VEGFC	IL6	0.08	3.23e-01
VEGFD	IL6	0.11	1.43e-01
CCL11	IL7	0.69	1.05e-22
CCL13	IL7	0.87	9.98e-61
CCL17	IL7	0.88	2.22e-58
CCL2	IL7	0.65	6.69e-16
CCL22	IL7	0.6	2.95e-10
CCL26	IL7	0.53	2.68e-09
CCL3	IL7	0.58	2.16e-08
CCL4	IL7	0.73	2.00e-25
CSF2	IL7	0.34	4.58e-05
CXCL10	IL7	0.55	1.41e-09
CXCL8	IL7	0.69	7.06e-20
FGF2	IL7	0.76	2.73e-52
FLT1	IL7	-0.14	2.41e-02
ICAM1	IL7	-0.05	5.08e-01
IFNG	IL7	0.22	7.00e-02
IL10	IL7	0.18	6.23e-02
IL12A	IL7	0.52	2.12e-10
IL12B	IL7	0.18	2.06e-01
IL13	IL7	0.37	7.55e-06
IL15	IL7	0.29	1.25e-03
IL16	IL7	0.67	6.11e-19
IL17A	IL7	0.47	3.09e-05
IL1A	IL7	0.47	1.94e-08
IL1B	IL7	0.47	2.52e-08
IL2	IL7	0.07	7.85e-01
IL4	IL7	0.39	3.30e-05
IL5	IL7	0.25	3.85e-02
IL6	IL7	-0.01	8.71e-01
LTA	IL7	0.54	1.52e-08
PGF	IL7	0.61	4.02e-19
TEK	IL7	0.5	3.06e-09
TNF	IL7	0.28	3.67e-03
VCAM1	IL7	0.4	2.82e-05
VEGFA	IL7	0.84	4.08e-48
VEGFC	IL7	0.79	1.21e-26
VEGFD	IL7	0.34	2.63e-09
CCL11	LTA	0.58	5.30e-12
CCL13	LTA	0.56	1.14e-11
CCL17	LTA	0.54	1.15e-09
CCL2	LTA	0.62	1.80e-16
CCL22	LTA	0.62	2.46e-19
CCL26	LTA	0.57	2.07e-13
CCL3	LTA	0.67	1.78e-12
CCL4	LTA	0.6	1.16e-14
CSF2	LTA	0.65	2.81e-25
CXCL10	LTA	0.58	7.66e-14
CXCL8	LTA	0.23	2.27e-01
FGF2	LTA	0.33	2.71e-03
FLT1	LTA	-0.16	3.05e-01
ICAM1	LTA	-0.13	2.95e-02
IFNG	LTA	0.33	8.66e-04
IL10	LTA	0.2	1.44e-01
IL12A	LTA	0.62	1.15e-19
IL12B	LTA	0.34	6.77e-05
IL13	LTA	0.39	1.43e-08
IL15	LTA	0.56	1.88e-23
IL16	LTA	0.61	2.86e-12
IL17A	LTA	0.58	1.11e-11
IL1A	LTA	0.27	2.31e-02
IL1B	LTA	0.1	8.55e-01
IL2	LTA	0.29	7.84e-04
IL4	LTA	0.35	2.28e-03
IL5	LTA	0.49	1.53e-14
IL6	LTA	0.05	8.87e-01
IL7	LTA	0.54	1.52e-08
PGF	LTA	0.31	4.28e-03
TEK	LTA	0.33	3.52e-05
TNF	LTA	0.24	2.86e-03
VCAM1	LTA	0.25	5.62e-02
VEGFA	LTA	0.54	1.28e-10
VEGFC	LTA	0.34	1.18e-02
VEGFD	LTA	0.04	5.89e-01
CCL11	PGF	0.59	2.82e-15
CCL13	PGF	0.61	3.72e-18
CCL17	PGF	0.67	4.50e-21
CCL2	PGF	0.46	2.25e-08
CCL22	PGF	0.37	1.06e-04
CCL26	PGF	0.38	1.60e-04
CCL3	PGF	0.42	1.07e-05
CCL4	PGF	0.46	2.05e-08
CSF2	PGF	0.18	1.35e-01
CXCL10	PGF	0.46	2.36e-08
CXCL8	PGF	0.6	1.27e-14
FGF2	PGF	0.7	1.39e-25
FLT1	PGF	-0.02	9.96e-01
ICAM1	PGF	0.18	4.14e-02
IFNG	PGF	0.36	2.60e-04
IL10	PGF	0.13	2.52e-01
IL12A	PGF	0.38	8.06e-06
IL12B	PGF	0.07	2.19e-01
IL13	PGF	0.21	6.21e-03
IL15	PGF	0.05	4.61e-01
IL16	PGF	0.5	7.46e-11
IL17A	PGF	0.29	8.13e-03
IL1A	PGF	0.36	1.36e-04
IL1B	PGF	0.44	1.72e-08
IL2	PGF	-0.02	8.96e-01
IL4	PGF	0.44	5.76e-08
IL5	PGF	0.06	5.46e-01
IL6	PGF	0.18	1.28e-02
IL7	PGF	0.61	4.02e-19
LTA	PGF	0.31	4.28e-03
TEK	PGF	0.46	1.16e-07
TNF	PGF	0.44	1.05e-08
VCAM1	PGF	0.53	5.66e-11
VEGFA	PGF	0.66	6.45e-20
VEGFC	PGF	0.64	1.37e-15
VEGFD	PGF	0.45	1.66e-10
CCL11	TEK	0.55	3.59e-11
CCL13	TEK	0.53	2.89e-11
CCL17	TEK	0.51	1.91e-09
CCL2	TEK	0.46	8.23e-08
CCL22	TEK	0.47	3.58e-07
CCL26	TEK	0.41	4.60e-08
CCL3	TEK	0.44	6.96e-05
CCL4	TEK	0.48	5.70e-09
CSF2	TEK	0.23	6.54e-03
CXCL10	TEK	0.44	2.62e-07
CXCL8	TEK	0.25	1.80e-03
FGF2	TEK	0.42	1.33e-07
FLT1	TEK	0.16	4.99e-03
ICAM1	TEK	0.01	9.10e-01
IFNG	TEK	0.05	5.57e-01
IL10	TEK	0.09	2.12e-01
IL12A	TEK	0.52	1.67e-09
IL12B	TEK	0.21	7.89e-03
IL13	TEK	0.31	4.68e-04
IL15	TEK	0.13	3.33e-03
IL16	TEK	0.52	8.57e-09
IL17A	TEK	0.47	4.06e-06
IL1A	TEK	0.28	2.04e-02
IL1B	TEK	0.21	1.31e-02
IL2	TEK	0.25	2.34e-02
IL4	TEK	0.36	8.63e-05
IL5	TEK	0.12	2.30e-02
IL6	TEK	-0.05	2.98e-01
IL7	TEK	0.5	3.06e-09
LTA	TEK	0.33	3.52e-05
PGF	TEK	0.46	1.16e-07
TNF	TEK	0.31	3.59e-04
VCAM1	TEK	0.33	1.84e-03
VEGFA	TEK	0.5	9.04e-09
VEGFC	TEK	0.49	1.68e-08
VEGFD	TEK	0.21	1.54e-02
CCL11	TNF	0.3	2.16e-04
CCL13	TNF	0.24	5.57e-03
CCL17	TNF	0.32	1.61e-04
CCL2	TNF	0.28	8.50e-04
CCL22	TNF	0.43	3.73e-07
CCL26	TNF	0.31	1.06e-04
CCL3	TNF	0.41	1.33e-06
CCL4	TNF	0.26	7.23e-04
CSF2	TNF	0.06	5.47e-01
CXCL10	TNF	0.48	6.37e-09
CXCL8	TNF	0.2	4.19e-03
FGF2	TNF	0.16	3.98e-02
FLT1	TNF	0.17	2.72e-02
ICAM1	TNF	-0.06	6.42e-01
IFNG	TNF	0.27	4.00e-03
IL10	TNF	0.21	2.59e-02
IL12A	TNF	0.44	3.76e-09
IL12B	TNF	0.37	2.39e-05
IL13	TNF	0.43	1.23e-05
IL15	TNF	0.22	3.42e-04
IL16	TNF	0.37	3.31e-06
IL17A	TNF	0.38	1.35e-06
IL1A	TNF	0.13	1.08e-01
IL1B	TNF	0.02	3.75e-02
IL2	TNF	0.37	1.97e-03
IL4	TNF	0.38	6.90e-06
IL5	TNF	0.13	1.41e-02
IL6	TNF	0.14	1.09e-01
IL7	TNF	0.28	3.67e-03
LTA	TNF	0.24	2.86e-03
PGF	TNF	0.44	1.05e-08
TEK	TNF	0.31	3.59e-04
VCAM1	TNF	0.26	1.60e-03
VEGFA	TNF	0.27	3.31e-03
VEGFC	TNF	0.07	1.06e-01
VEGFD	TNF	-0.12	3.94e-01
CCL11	VCAM1	0.38	1.58e-04
CCL13	VCAM1	0.37	1.15e-04
CCL17	VCAM1	0.45	5.96e-06
CCL2	VCAM1	0.3	5.51e-03
CCL22	VCAM1	0.26	4.24e-02
CCL26	VCAM1	0.18	1.81e-01
CCL3	VCAM1	0.32	4.45e-03
CCL4	VCAM1	0.39	8.62e-05
CSF2	VCAM1	0.2	1.03e-01
CXCL10	VCAM1	0.42	6.94e-06
CXCL8	VCAM1	0.37	5.10e-04
FGF2	VCAM1	0.49	3.65e-07
FLT1	VCAM1	0.14	6.00e-03
ICAM1	VCAM1	0.57	1.73e-19
IFNG	VCAM1	0.36	1.67e-04
IL10	VCAM1	0.08	3.91e-01
IL12A	VCAM1	0.29	4.67e-03
IL12B	VCAM1	0.14	3.71e-02
IL13	VCAM1	0.12	2.73e-01
IL15	VCAM1	0.05	7.49e-01
IL16	VCAM1	0.3	2.03e-02
IL17A	VCAM1	0.17	3.22e-01
IL1A	VCAM1	0.15	3.26e-01
IL1B	VCAM1	0.13	1.15e-01
IL2	VCAM1	0.01	4.48e-01
IL4	VCAM1	0.18	1.23e-01
IL5	VCAM1	0.1	6.83e-01
IL6	VCAM1	0.16	7.48e-03
IL7	VCAM1	0.4	2.82e-05
LTA	VCAM1	0.25	5.62e-02
PGF	VCAM1	0.53	5.66e-11
TEK	VCAM1	0.33	1.84e-03
TNF	VCAM1	0.26	1.60e-03
VEGFA	VCAM1	0.36	7.03e-04
VEGFC	VCAM1	0.38	7.01e-04
VEGFD	VCAM1	0.34	4.54e-05
CCL11	VEGFA	0.69	4.88e-22
CCL13	VEGFA	0.81	2.16e-42
CCL17	VEGFA	0.79	7.56e-36
CCL2	VEGFA	0.64	5.69e-17
CCL22	VEGFA	0.5	8.67e-09
CCL26	VEGFA	0.46	9.76e-09
CCL3	VEGFA	0.58	3.20e-09
CCL4	VEGFA	0.68	1.63e-21
CSF2	VEGFA	0.41	4.66e-07
CXCL10	VEGFA	0.5	1.94e-09
CXCL8	VEGFA	0.61	2.63e-15
FGF2	VEGFA	0.78	7.31e-38
FLT1	VEGFA	-0.2	9.39e-03
ICAM1	VEGFA	-0.07	1.49e-01
IFNG	VEGFA	0.22	4.46e-02
IL10	VEGFA	0.12	3.09e-01
IL12A	VEGFA	0.54	5.87e-13
IL12B	VEGFA	0.24	2.11e-02
IL13	VEGFA	0.44	1.80e-08
IL15	VEGFA	0.24	1.54e-04
IL16	VEGFA	0.71	5.23e-22
IL17A	VEGFA	0.52	7.59e-08
IL1A	VEGFA	0.51	8.08e-10
IL1B	VEGFA	0.55	4.00e-10
IL2	VEGFA	0.07	5.11e-01
IL4	VEGFA	0.43	2.20e-06
IL5	VEGFA	0.27	6.99e-04
IL6	VEGFA	0.01	7.39e-01
IL7	VEGFA	0.84	4.08e-48
LTA	VEGFA	0.54	1.28e-10
PGF	VEGFA	0.66	6.45e-20
TEK	VEGFA	0.5	9.04e-09
TNF	VEGFA	0.27	3.31e-03
VCAM1	VEGFA	0.36	7.03e-04
VEGFC	VEGFA	0.76	1.61e-19
VEGFD	VEGFA	0.37	1.37e-07
CCL11	VEGFC	0.61	5.48e-13
CCL13	VEGFC	0.77	1.65e-23
CCL17	VEGFC	0.74	5.24e-20
CCL2	VEGFC	0.49	1.59e-06
CCL22	VEGFC	0.33	1.27e-02
CCL26	VEGFC	0.27	1.93e-02
CCL3	VEGFC	0.35	1.35e-05
CCL4	VEGFC	0.52	2.12e-07
CSF2	VEGFC	0.24	1.49e-02
CXCL10	VEGFC	0.3	7.53e-03
CXCL8	VEGFC	0.68	4.43e-14
FGF2	VEGFC	0.81	2.52e-28
FLT1	VEGFC	-0.23	1.51e-02
ICAM1	VEGFC	0.15	1.79e-01
IFNG	VEGFC	0.24	2.95e-02
IL10	VEGFC	0.04	5.40e-01
IL12A	VEGFC	0.37	5.77e-05
IL12B	VEGFC	0.02	6.88e-01
IL13	VEGFC	0.14	2.35e-01
IL15	VEGFC	-0.05	4.67e-01
IL16	VEGFC	0.51	2.03e-07
IL17A	VEGFC	0.31	3.46e-02
IL1A	VEGFC	0.48	2.38e-04
IL1B	VEGFC	0.59	3.75e-08
IL2	VEGFC	-0.04	5.77e-01
IL4	VEGFC	0.33	3.86e-04
IL5	VEGFC	0.09	2.27e-01
IL6	VEGFC	0.08	3.23e-01
IL7	VEGFC	0.79	1.21e-26
LTA	VEGFC	0.34	1.18e-02
PGF	VEGFC	0.64	1.37e-15
TEK	VEGFC	0.49	1.68e-08
TNF	VEGFC	0.07	1.06e-01
VCAM1	VEGFC	0.38	7.01e-04
VEGFA	VEGFC	0.76	1.61e-19
VEGFD	VEGFC	0.66	6.52e-17
CCL11	VEGFD	0.28	7.58e-05
CCL13	VEGFD	0.4	9.02e-10
CCL17	VEGFD	0.33	1.22e-06
CCL2	VEGFD	0.19	3.68e-02
CCL22	VEGFD	-0.01	3.61e-01
CCL26	VEGFD	-0.1	1.36e-01
CCL3	VEGFD	-0.01	6.07e-01
CCL4	VEGFD	0.16	7.22e-02
CSF2	VEGFD	-0.03	5.26e-01
CXCL10	VEGFD	-0.04	5.87e-01
CXCL8	VEGFD	0.58	2.06e-14
FGF2	VEGFD	0.52	5.06e-17
FLT1	VEGFD	-0.32	6.00e-05
ICAM1	VEGFD	0.38	4.00e-04
IFNG	VEGFD	0.24	3.25e-02
IL10	VEGFD	0	8.26e-01
IL12A	VEGFD	-0.09	2.82e-01
IL12B	VEGFD	-0.09	9.10e-01
IL13	VEGFD	-0.16	3.03e-01
IL15	VEGFD	-0.27	7.26e-05
IL16	VEGFD	0.09	2.88e-01
IL17A	VEGFD	-0.08	5.01e-02
IL1A	VEGFD	0.3	3.37e-03
IL1B	VEGFD	0.44	5.65e-08
IL2	VEGFD	-0.14	7.83e-01
IL4	VEGFD	0.12	7.99e-03
IL5	VEGFD	-0.04	2.69e-01
IL6	VEGFD	0.11	1.43e-01
IL7	VEGFD	0.34	2.63e-09
LTA	VEGFD	0.04	5.89e-01
PGF	VEGFD	0.45	1.66e-10
TEK	VEGFD	0.21	1.54e-02
TNF	VEGFD	-0.12	3.94e-01
VCAM1	VEGFD	0.34	4.54e-05
VEGFA	VEGFD	0.37	1.37e-07
VEGFC	VEGFD	0.66	6.52e-17

## Sheet: Table_S4
Metadata	Comparison	Panel	variable	logFC	CI.L	CI.R	AveExpr	t	P.Value	adjusted_p_value	Estimate
Group	Control .vs. Fabry Non Treated	Angiogenesis	FGF2	2.30372	1.9301	2.67733	-1.04703e-16	12.1384	1.82567e-27	7.48523e-26	51.6023
Group	Control .vs. Fabry Non Treated	Cytokine	IL7	1.91228	1.54316	2.2814	5.35605e-17	10.1986	6.12754e-21	1.25615e-19	36.7216
Group	Control .vs. Fabry Non Treated	Cytokine	VEGFA	1.8231	1.40557	2.24063	-3.01939e-16	8.59562	6.22603e-16	6.38168e-15	25.3347
Group	Control .vs. Fabry Non Treated	Angiogenesis	VEGFC	1.56096	1.16294	1.95898	7.61746e-17	7.72038	2.13204e-13	1.74828e-12	19.5885
Group	Control .vs. Fabry Non Treated	Chemokine	CCL17	1.32139	0.859718	1.78305	-1.00753e-16	5.63448	4.32207e-08	2.95342e-07	7.63709
Group	Control .vs. Fabry Non Treated	Chemokine	CCL13	1.08811	0.636352	1.53986	2.176e-16	4.74158	3.40023e-06	1.99156e-05	3.42044
Group	Control .vs. Fabry Non Treated	Angiogenesis	PGF	1.11978	0.642696	1.59686	-4.4101e-16	4.62055	5.87557e-06	3.01123e-05	2.89575
Group	Control .vs. Fabry Non Treated	Angiogenesis	VEGFD	1.08991	0.619535	1.56028	-4.7955e-16	4.56142	7.64463e-06	3.48255e-05	2.64364
Group	Control .vs. Fabry Non Treated	Proinflammatory	CXCL8	1.01462	0.507632	1.52161	-8.03825e-17	3.93966	0.000103392	0.000423907	0.164762
Group	Control .vs. Fabry Non Treated	Chemokine	CCL4	0.909327	0.43976	1.37889	1.92519e-16	3.81221	0.000169845	0.00063306	-0.303586
Group	Control .vs. Fabry Non Treated	Proinflammatory	IL1B	0.87729	0.360105	1.39448	-5.53509e-17	3.33926	0.000955445	0.00326444	-1.91909
Group	Control .vs. Fabry Non Treated	Cytokine	IL16	0.761108	0.261918	1.2603	-1.96658e-16	3.00147	0.00293225	0.00924785	-2.95203
Group	Control .vs. Fabry Non Treated	Proinflammatory	IFNG	0.737912	0.235021	1.2408	-5.48354e-17	2.88858	0.00417603	0.0122298	-3.27427
Group	Control .vs. Fabry Non Treated	Cytokine	IL1A	0.504848	0.0649923	0.944703	-6.50974e-17	2.25946	0.0246337	0.0673321	-4.85478
Group	Control .vs. Fabry Non Treated	Chemokine	CCL11	0.552275	0.0550705	1.04948	-1.9415e-16	2.18662	0.0296084	0.0758714	-5.01381
Group	Control .vs. Fabry Non Treated	Cytokine	CSF2	0.555232	0.0478945	1.06257	4.12432e-17	2.15442	0.032071	0.0773476	-5.08251
Group	Control .vs. Fabry Non Treated	Chemokine	CCL3	0.529734	0.0233372	1.03613	-1.52535e-16	2.0593	0.0404016	0.0920258	-5.2797
Group	Control .vs. Fabry Non Treated	Cytokine	IL12A	0.513761	-0.00336311	1.03089	-4.08231e-16	1.95578	0.0514982	0.111128	-5.48449
Group	Control .vs. Fabry Non Treated	Chemokine	CXCL8	-0.486516	-0.984685	0.0116517	-1.07009e-17	-1.92254	0.0555654	0.113909	-5.54807
Group	Control .vs. Fabry Non Treated	Cytokine	IL17A	0.467582	-0.0404501	0.975614	-8.10374e-17	1.81184	0.0710957	0.138806	-5.75214
Group	Control .vs. Fabry Non Treated	Chemokine	CCL2	0.395068	-0.133513	0.923648	9.81477e-17	1.47134	0.142336	0.265262	-6.30552
Group	Control .vs. Fabry Non Treated	Proinflammatory	IL4	0.387059	-0.147638	0.921756	4.74018e-17	1.42502	0.155278	0.273211	-6.37208
Group	Control .vs. Fabry Non Treated	Vascular_Injury	SAA1	0.387318	-0.154931	0.929567	-6.15722e-17	1.40612	0.160811	0.273211	-6.39865
Group	Control .vs. Fabry Non Treated	Angiogenesis	FLT1	-0.368914	-0.892558	0.15473	8.86632e-16	-1.38689	0.166592	0.273211	-6.42531
Group	Control .vs. Fabry Non Treated	Cytokine	LTA	0.335223	-0.201577	0.872022	-4.4859e-17	1.22935	0.219987	0.346902	-6.63008
Group	Control .vs. Fabry Non Treated	Cytokine	IL5	-0.278936	-0.772894	0.215022	-5.61382e-17	-1.11165	0.267254	0.40583	-6.76713
Group	Control .vs. Fabry Non Treated	Proinflammatory	IL6	0.291682	-0.243018	0.826381	6.72571e-17	1.07387	0.283816	0.415587	-6.80823
Group	Control .vs. Fabry Non Treated	Proinflammatory	IL13	0.254575	-0.272709	0.781859	5.51698e-17	0.950439	0.342719	0.477169	-6.93268
Group	Control .vs. Fabry Non Treated	Chemokine	CXCL10	0.242759	-0.270217	0.755735	-2.7339e-16	0.931605	0.352353	0.477169	-6.95034
Group	Control .vs. Fabry Non Treated	Vascular_Injury	ICAM1	0.243875	-0.28059	0.76834	7.19539e-16	0.915387	0.360786	0.477169	-6.96527
Group	Control .vs. Fabry Non Treated	Proinflammatory	IL2	-0.22113	-0.761951	0.319691	1.79185e-17	-0.80491	0.421563	0.540128	-7.06002
Group	Control .vs. Fabry Non Treated	Cytokine	IL15	-0.18717	-0.71059	0.336251	1.55164e-16	-0.703945	0.48206	0.592058	-7.13602
Group	Control .vs. Fabry Non Treated	Proinflammatory	IL10	0.173048	-0.32504	0.671135	1.23542e-16	0.683934	0.49459	0.592058	-7.14988
Group	Control .vs. Fabry Non Treated	Chemokine	CCL26	0.16664	-0.325282	0.658562	-1.51081e-16	0.666864	0.505415	0.592058	-7.16139
Group	Control .vs. Fabry Non Treated	Angiogenesis	TEK	0.161137	-0.355945	0.678219	-1.07048e-15	0.613464	0.540074	0.610066	-7.19552
Group	Control .vs. Fabry Non Treated	Vascular_Injury	VCAM1	0.160644	-0.368475	0.689762	-2.33831e-16	0.597673	0.550547	0.610066	-7.20506
Group	Control .vs. Fabry Non Treated	Proinflammatory	IL12B	0.137441	-0.407149	0.68203	-7.01309e-17	0.496821	0.61971	0.668635	-7.26018
Group	Control .vs. Fabry Non Treated	Vascular_Injury	CRP	0.0453253	-0.496827	0.587478	4.17455e-16	0.164578	0.869396	0.913981	-7.36998
Group	Control .vs. Fabry Non Treated	Proinflammatory	TNF	-0.0196144	-0.517814	0.478586	-1.54599e-16	-0.0775042	0.938279	0.961735	-7.38052
Group	Control .vs. Fabry Non Treated	Chemokine	CCL22	-0.00015645	-0.499771	0.499458	2.74249e-16	-0.000616444	0.999509	0.999509	-7.38352
Group	Control .vs. Fabry Treated	Angiogenesis	FGF2	2.21807	1.83674	2.5994	-1.04703e-16	11.4505	4.18323e-25	1.71512e-23	46.2273
Group	Control .vs. Fabry Treated	Cytokine	IL7	2.10953	1.73279	2.48628	5.35605e-17	11.0228	1.16271e-23	2.38355e-22	42.935
Group	Control .vs. Fabry Treated	Angiogenesis	VEGFC	1.82197	1.41573	2.22822	7.61746e-17	8.82894	1.23813e-16	1.69211e-15	26.9418
Group	Control .vs. Fabry Treated	Cytokine	VEGFA	1.84776	1.42161	2.27392	-3.01939e-16	8.53559	9.39802e-16	9.63297e-15	24.9434
Group	Control .vs. Fabry Treated	Angiogenesis	VEGFD	1.41572	0.935629	1.89581	-4.7955e-16	5.80505	1.76168e-08	1.20382e-07	8.52664
Group	Control .vs. Fabry Treated	Chemokine	CCL13	1.30854	0.847453	1.76963	2.176e-16	5.58673	5.53672e-08	3.24294e-07	7.41465
Group	Control .vs. Fabry Treated	Angiogenesis	PGF	1.36528	0.878348	1.85222	-4.4101e-16	5.51956	7.82425e-08	4.00993e-07	7.07929
Group	Control .vs. Fabry Treated	Chemokine	CCL17	1.22625	0.75505	1.69746	-1.00753e-16	5.123	5.65023e-07	2.57399e-06	5.16679
Group	Control .vs. Fabry Treated	Proinflammatory	CXCL8	1.17691	0.659444	1.69437	-8.03825e-17	4.4773	1.10658e-05	4.53698e-05	2.30858
Group	Control .vs. Fabry Treated	Chemokine	CCL4	1.07579	0.596525	1.55506	1.92519e-16	4.4188	1.42663e-05	5.31742e-05	2.0659
Group	Control .vs. Fabry Treated	Cytokine	CSF2	0.883278	0.365458	1.4011	4.12432e-17	3.35794	0.000895544	0.00305977	-1.83954
Group	Control .vs. Fabry Treated	Cytokine	IL16	0.850345	0.340842	1.35985	-1.96658e-16	3.2855	0.00114936	0.00362491	-2.0708
Group	Control .vs. Fabry Treated	Proinflammatory	IL1B	0.813657	0.285787	1.34153	-5.53509e-17	3.03436	0.00263986	0.00773101	-2.8363
Group	Control .vs. Fabry Treated	Cytokine	IL1A	0.672563	0.22362	1.12151	-6.50974e-17	2.94914	0.00345902	0.00945466	-3.08315
Group	Control .vs. Fabry Treated	Chemokine	CCL11	0.697877	0.1904	1.20535	-1.9415e-16	2.70717	0.00720838	0.0184715	-3.7479
Group	Control .vs. Fabry Treated	Cytokine	IL12A	0.666212	0.138404	1.19402	-4.08231e-16	2.48479	0.0135546	0.0326906	-4.31119
Group	Control .vs. Fabry Treated	Chemokine	CCL2	0.610053	0.0705527	1.14955	9.81477e-17	2.22602	0.026819	0.0610877	-4.90843
Group	Control .vs. Fabry Treated	Vascular_Injury	SAA1	0.577827	0.0243758	1.13128	-6.15722e-17	2.05528	0.0407909	0.0880224	-5.2678
Group	Control .vs. Fabry Treated	Chemokine	CCL3	0.530288	0.0134292	1.04715	-1.52535e-16	2.01973	0.044376	0.0909707	-5.33914
Group	Control .vs. Fabry Treated	Angiogenesis	FLT1	-0.459277	-0.99374	0.0751852	8.86632e-16	-1.69165	0.091839	0.179305	-5.94017
Group	Control .vs. Fabry Treated	Cytokine	LTA	0.442291	-0.105598	0.990181	-4.4859e-17	1.58917	0.113166	0.21033	-6.10661
Group	Control .vs. Fabry Treated	Chemokine	CXCL8	-0.400617	-0.909077	0.107843	-1.07009e-17	-1.55105	0.122034	0.21033	-6.1659
Group	Control .vs. Fabry Treated	Chemokine	CCL26	0.394442	-0.107643	0.896527	-1.51081e-16	1.54653	0.12312	0.21033	-6.17284
Group	Control .vs. Fabry Treated	Angiogenesis	TEK	0.326375	-0.20139	0.85414	-1.07048e-15	1.21739	0.224494	0.36817	-6.62437
Group	Control .vs. Fabry Treated	Vascular_Injury	CRP	-0.309125	-0.862478	0.244228	4.17455e-16	-1.09973	0.272407	0.429565	-6.75998
Group	Control .vs. Fabry Treated	Cytokine	IL5	0.26318	-0.240983	0.767342	-5.61382e-17	1.02763	0.305024	0.463185	-6.83633
Group	Control .vs. Fabry Treated	Proinflammatory	IL4	0.251537	-0.294207	0.797281	4.74018e-17	0.907333	0.365021	0.534495	-6.95228
Group	Control .vs. Fabry Treated	Proinflammatory	IL2	-0.236966	-0.78896	0.315028	1.79185e-17	-0.845093	0.39879	0.563806	-7.00664
Group	Control .vs. Fabry Treated	Chemokine	CCL22	0.175502	-0.334434	0.685438	2.74249e-16	0.677518	0.498644	0.671717	-7.13391
Group	Control .vs. Fabry Treated	Proinflammatory	TNF	-0.171255	-0.679748	0.337237	-1.54599e-16	-0.662998	0.507884	0.671717	-7.14362
Group	Control .vs. Fabry Treated	Cytokine	IL17A	0.154483	-0.364045	0.67301	-8.10374e-17	0.58649	0.558025	0.714969	-7.19133
Group	Control .vs. Fabry Treated	Proinflammatory	IFNG	0.13969	-0.373591	0.65297	-5.48354e-17	0.535751	0.592562	0.718808	-7.21976
Group	Control .vs. Fabry Treated	Chemokine	CXCL10	0.141135	-0.382439	0.664709	-2.7339e-16	0.530654	0.596085	0.718808	-7.22248
Group	Control .vs. Fabry Treated	Cytokine	IL15	0.131255	-0.402979	0.665489	1.55164e-16	0.483658	0.629011	0.736842	-7.24628
Group	Control .vs. Fabry Treated	Vascular_Injury	ICAM1	-0.0812037	-0.616504	0.454096	7.19539e-16	-0.298629	0.765447	0.845012	-7.31858
Group	Control .vs. Fabry Treated	Proinflammatory	IL6	0.0782306	-0.467516	0.623977	6.72571e-17	0.282189	0.77801	0.845012	-7.32336
Group	Control .vs. Fabry Treated	Proinflammatory	IL12B	-0.0777728	-0.633613	0.478067	-7.01309e-17	-0.275443	0.783182	0.845012	-7.32524
Group	Control .vs. Fabry Treated	Vascular_Injury	VCAM1	0.0654026	-0.474647	0.605453	-2.33831e-16	0.238404	0.811744	0.853372	-7.33475
Group	Control .vs. Fabry Treated	Proinflammatory	IL10	0.0471942	-0.461184	0.555572	1.23542e-16	0.182749	0.855129	0.876507	-7.34646
Group	Control .vs. Fabry Treated	Proinflammatory	IL13	-0.0254574	-0.563635	0.51272	5.51698e-17	-0.0931196	0.925876	0.925876	-7.35882
Group	Fabry Non Treated .vs. Fabry Treated	Proinflammatory	IFNG	-0.598223	-1.2061	0.00965166	-5.48354e-17	-1.93733	0.0537241	0.86328	-4.46029
Group	Fabry Non Treated .vs. Fabry Treated	Cytokine	IL5	0.542116	-0.0549606	1.13919	-5.61382e-17	1.78737	0.0749723	0.86328	-4.48799
Group	Fabry Non Treated .vs. Fabry Treated	Angiogenesis	VEGFD	0.325812	-0.242759	0.894382	-4.7955e-16	1.12807	0.260269	0.86328	-4.58412
Group	Fabry Non Treated .vs. Fabry Treated	Angiogenesis	VEGFC	0.261015	-0.220097	0.742127	7.61746e-17	1.068	0.286451	0.86328	-4.59077
Group	Fabry Non Treated .vs. Fabry Treated	Vascular_Injury	CRP	-0.35445	-1.00978	0.300882	4.17455e-16	-1.06475	0.287918	0.86328	-4.59112
Group	Fabry Non Treated .vs. Fabry Treated	Cytokine	CSF2	0.328045	-0.285205	0.941295	4.12432e-17	1.05305	0.293237	0.86328	-4.59237
Group	Fabry Non Treated .vs. Fabry Treated	Vascular_Injury	ICAM1	-0.325079	-0.959031	0.308873	7.19539e-16	-1.00945	0.31364	0.86328	-4.5969
Group	Fabry Non Treated .vs. Fabry Treated	Cytokine	IL17A	-0.313099	-0.927188	0.300989	-8.10374e-17	-1.0037	0.3164	0.86328	-4.59748
Group	Fabry Non Treated .vs. Fabry Treated	Cytokine	IL15	0.318425	-0.314264	0.951115	1.55164e-16	0.990764	0.322667	0.86328	-4.59879
Group	Fabry Non Treated .vs. Fabry Treated	Cytokine	IL7	0.197251	-0.248925	0.643428	5.35605e-17	0.870295	0.384894	0.86328	-4.6101
Group	Fabry Non Treated .vs. Fabry Treated	Proinflammatory	IL13	-0.280032	-0.917393	0.357328	5.51698e-17	-0.864921	0.387832	0.86328	-4.61057
Group	Fabry Non Treated .vs. Fabry Treated	Angiogenesis	PGF	0.245508	-0.331168	0.822183	-4.4101e-16	0.838082	0.402708	0.86328	-4.61288
Group	Fabry Non Treated .vs. Fabry Treated	Chemokine	CCL13	0.220435	-0.325627	0.766496	2.176e-16	0.794679	0.427482	0.86328	-4.61647
Group	Fabry Non Treated .vs. Fabry Treated	Chemokine	CCL26	0.227802	-0.366814	0.822417	-1.51081e-16	0.754178	0.451384	0.86328	-4.61964
Group	Fabry Non Treated .vs. Fabry Treated	Chemokine	CCL2	0.214986	-0.423941	0.853912	9.81477e-17	0.662387	0.508275	0.86328	-4.62622
Group	Fabry Non Treated .vs. Fabry Treated	Proinflammatory	IL6	-0.213451	-0.859775	0.432872	6.72571e-17	-0.650133	0.516146	0.86328	-4.62703
Group	Fabry Non Treated .vs. Fabry Treated	Proinflammatory	IL12B	-0.215213	-0.873491	0.443064	-7.01309e-17	-0.643597	0.520371	0.86328	-4.62746
Group	Fabry Non Treated .vs. Fabry Treated	Cytokine	IL1A	0.167715	-0.363964	0.699395	-6.50974e-17	0.620978	0.535126	0.86328	-4.62891
Group	Fabry Non Treated .vs. Fabry Treated	Chemokine	CCL4	0.166465	-0.401127	0.734058	1.92519e-16	0.577351	0.564172	0.86328	-4.63156
Group	Fabry Non Treated .vs. Fabry Treated	Chemokine	CCL22	0.175659	-0.428255	0.779573	2.74249e-16	0.572596	0.567383	0.86328	-4.63184
Group	Fabry Non Treated .vs. Fabry Treated	Vascular_Injury	SAA1	0.190509	-0.464939	0.845958	-6.15722e-17	0.572178	0.567667	0.86328	-4.63186
Group	Fabry Non Treated .vs. Fabry Treated	Proinflammatory	CXCL8	0.162286	-0.450543	0.775114	-8.03825e-17	0.521309	0.602569	0.86328	-4.63468
Group	Fabry Non Treated .vs. Fabry Treated	Angiogenesis	TEK	0.165238	-0.45979	0.790266	-1.07048e-15	0.520432	0.603179	0.86328	-4.63473
Group	Fabry Non Treated .vs. Fabry Treated	Proinflammatory	TNF	-0.151641	-0.753845	0.450563	-1.54599e-16	-0.495708	0.620495	0.86328	-4.636
Group	Fabry Non Treated .vs. Fabry Treated	Cytokine	IL12A	0.15245	-0.472629	0.777529	-4.08231e-16	0.480117	0.631524	0.86328	-4.63677
Group	Fabry Non Treated .vs. Fabry Treated	Chemokine	CCL11	0.145602	-0.4554	0.746603	-1.9415e-16	0.476919	0.633796	0.86328	-4.63693
Group	Fabry Non Treated .vs. Fabry Treated	Proinflammatory	IL4	-0.135522	-0.781842	0.510799	4.74018e-17	-0.412776	0.680091	0.86328	-4.63982
Group	Fabry Non Treated .vs. Fabry Treated	Proinflammatory	IL10	-0.125854	-0.727922	0.476214	1.23542e-16	-0.411504	0.681022	0.86328	-4.63987
Group	Fabry Non Treated .vs. Fabry Treated	Angiogenesis	FGF2	-0.0856487	-0.537256	0.365959	-1.04703e-16	-0.373347	0.709176	0.86328	-4.64139
Group	Fabry Non Treated .vs. Fabry Treated	Chemokine	CCL17	-0.0951303	-0.653175	0.462915	-1.00753e-16	-0.335585	0.737438	0.86328	-4.64275
Group	Fabry Non Treated .vs. Fabry Treated	Cytokine	LTA	0.107069	-0.541793	0.755931	-4.4859e-17	0.324836	0.745551	0.86328	-4.64311
Group	Fabry Non Treated .vs. Fabry Treated	Chemokine	CXCL10	-0.101624	-0.721689	0.518441	-2.7339e-16	-0.322635	0.747216	0.86328	-4.64318
Group	Fabry Non Treated .vs. Fabry Treated	Vascular_Injury	VCAM1	-0.095241	-0.734818	0.544337	-2.33831e-16	-0.293146	0.76963	0.86328	-4.64411
Group	Fabry Non Treated .vs. Fabry Treated	Cytokine	IL16	0.0892369	-0.514165	0.692639	-1.96658e-16	0.291133	0.771168	0.86328	-4.64417
Group	Fabry Non Treated .vs. Fabry Treated	Angiogenesis	FLT1	-0.0903632	-0.723323	0.542597	8.86632e-16	-0.28104	0.77889	0.86328	-4.64446
Group	Fabry Non Treated .vs. Fabry Treated	Chemokine	CXCL8	0.0858997	-0.516266	0.688065	-1.07009e-17	0.280821	0.779058	0.86328	-4.64446
Group	Fabry Non Treated .vs. Fabry Treated	Proinflammatory	IL1B	-0.0636333	-0.688786	0.56152	-5.53509e-17	-0.200379	0.841332	0.907753	-4.64643
Group	Fabry Non Treated .vs. Fabry Treated	Cytokine	VEGFA	0.0246676	-0.480024	0.529359	-3.01939e-16	0.0962175	0.923418	0.970772	-4.648
Group	Fabry Non Treated .vs. Fabry Treated	Proinflammatory	IL2	-0.0158359	-0.669559	0.637887	1.79185e-17	-0.0476873	0.962	0.98605	-4.64835
Group	Fabry Non Treated .vs. Fabry Treated	Chemokine	CCL3	0.000553842	-0.611558	0.612666	-1.52535e-16	0.00178118	0.99858	0.99858	-4.64847
Phenotype	Classic .vs. Control	Angiogenesis	FGF2	-2.27157	-2.632	-1.91114	-1.04703e-16	-12.4067	2.11485e-28	8.67088e-27	53.723
Phenotype	Classic .vs. Control	Cytokine	IL7	-2.02636	-2.38277	-1.66995	5.35605e-17	-11.1923	3.10668e-24	6.36869e-23	44.2113
Phenotype	Classic .vs. Control	Angiogenesis	VEGFC	-1.74369	-2.12776	-1.35963	7.61746e-17	-8.93758	5.76866e-17	7.88383e-16	27.6552
Phenotype	Classic .vs. Control	Cytokine	VEGFA	-1.77055	-2.17303	-1.36807	-3.01939e-16	-8.65999	3.98349e-16	4.08307e-15	25.7486
Phenotype	Classic .vs. Control	Angiogenesis	VEGFD	-1.37106	-1.82473	-0.917395	-4.7955e-16	-5.94936	8.11284e-09	5.54377e-08	9.23153
Phenotype	Classic .vs. Control	Chemokine	CCL17	-1.27902	-1.72413	-0.833911	-1.00753e-16	-5.65668	3.84699e-08	2.25324e-07	7.71799
Phenotype	Classic .vs. Control	Angiogenesis	PGF	-1.25949	-1.71987	-0.799098	-4.4101e-16	-5.38543	1.54511e-07	7.91869e-07	6.3695
Phenotype	Classic .vs. Control	Chemokine	CCL13	-1.18193	-1.61796	-0.745897	2.176e-16	-5.33613	1.97846e-07	9.01299e-07	6.13012
Phenotype	Classic .vs. Control	Proinflammatory	CXCL8	-1.08804	-1.57672	-0.599355	-8.03825e-17	-4.38297	1.6641e-05	6.82282e-05	1.86626
Phenotype	Classic .vs. Control	Chemokine	CCL4	-0.996507	-1.44931	-0.543704	1.92519e-16	-4.33235	2.06599e-05	7.70051e-05	1.65985
Phenotype	Classic .vs. Control	Cytokine	CSF2	-0.858847	-1.34779	-0.369901	4.12432e-17	-3.45785	0.000630204	0.0021532	-1.567
Phenotype	Classic .vs. Control	Cytokine	IL16	-0.830166	-1.31166	-0.348669	-1.96658e-16	-3.39409	0.00078932	0.00248939	-1.77656
Phenotype	Classic .vs. Control	Proinflammatory	IL1B	-0.839557	-1.33808	-0.341033	-5.53509e-17	-3.31525	0.00103783	0.00303936	-2.03068
Phenotype	Classic .vs. Control	Cytokine	IL1A	-0.598947	-1.02451	-0.173385	-6.50974e-17	-2.77062	0.00597384	0.0163285	-3.63382
Phenotype	Classic .vs. Control	Chemokine	CCL11	-0.619231	-1.0987	-0.139758	-1.9415e-16	-2.54238	0.0115554	0.0296108	-4.22505
Phenotype	Classic .vs. Control	Chemokine	CXCL8	0.594667	0.11516	1.07417	-1.07009e-17	2.44135	0.0152592	0.0368016	-4.47127
Phenotype	Classic .vs. Control	Chemokine	CCL26	-0.555519	-1.02725	-0.0837848	-1.51081e-16	-2.31821	0.0211669	0.0482135	-4.75843
Phenotype	Classic .vs. Control	Chemokine	CCL2	-0.566341	-1.07617	-0.0565085	9.81477e-17	-2.18677	0.029597	0.0638673	-5.04919
Phenotype	Classic .vs. Control	Vascular_Injury	SAA1	-0.493381	-1.01596	0.0291975	-6.15722e-17	-1.85859	0.0641476	0.131503	-5.70328
Phenotype	Classic .vs. Control	Chemokine	CCL3	-0.420165	-0.908737	0.0684083	-1.52535e-16	-1.69294	0.0915922	0.178823	-5.99411
Phenotype	Classic .vs. Control	Cytokine	IL12A	-0.415479	-0.913652	0.0826943	-4.08231e-16	-1.6418	0.101767	0.189657	-6.07854
Phenotype	Classic .vs. Control	Cytokine	LTA	-0.420816	-0.938303	0.0966705	-4.4859e-17	-1.60083	0.110556	0.197078	-6.14434
Phenotype	Classic .vs. Control	Proinflammatory	IL4	-0.390079	-0.904828	0.124671	4.74018e-17	-1.49179	0.136893	0.233859	-6.31151
Phenotype	Classic .vs. Control	Angiogenesis	FLT1	0.339523	-0.164725	0.84377	8.86632e-16	1.32549	0.186101	0.300687	-6.54411
Phenotype	Classic .vs. Control	Proinflammatory	IFNG	-0.325788	-0.814691	0.163116	-5.48354e-17	-1.31179	0.19068	0.300687	-6.56207
Phenotype	Classic .vs. Control	Angiogenesis	TEK	-0.246712	-0.745078	0.251654	-1.07048e-15	-0.974528	0.330646	0.502092	-6.94578
Phenotype	Classic .vs. Control	Proinflammatory	IL2	0.236923	-0.284202	0.758047	1.79185e-17	0.894988	0.371572	0.529146	-7.0199
Phenotype	Classic .vs. Control	Proinflammatory	IL6	-0.226214	-0.741874	0.289445	6.72571e-17	-0.863593	0.388559	0.529146	-7.04743
Phenotype	Classic .vs. Control	Cytokine	IL17A	-0.21168	-0.70197	0.27861	-8.10374e-17	-0.849921	0.396104	0.529146	-7.05912
Phenotype	Classic .vs. Control	Proinflammatory	TNF	0.205286	-0.27423	0.684801	-1.54599e-16	0.842768	0.400086	0.529146	-7.06515
Phenotype	Classic .vs. Control	Vascular_Injury	ICAM1	-0.187139	-0.692292	0.318014	7.19539e-16	-0.729277	0.466449	0.597638	-7.15417
Phenotype	Classic .vs. Control	Chemokine	CXCL10	-0.176691	-0.671076	0.317695	-2.7339e-16	-0.703558	0.4823	0.599221	-7.17256
Phenotype	Classic .vs. Control	Chemokine	CCL22	-0.165566	-0.646993	0.315861	2.74249e-16	-0.677006	0.498968	0.601696	-7.19086
Phenotype	Classic .vs. Control	Cytokine	IL5	-0.146933	-0.623737	0.329871	-5.61382e-17	-0.60664	0.544588	0.637945	-7.23596
Phenotype	Classic .vs. Control	Vascular_Injury	VCAM1	-0.130814	-0.640842	0.379214	-2.33831e-16	-0.504908	0.614025	0.694136	-7.29244
Phenotype	Classic .vs. Control	Proinflammatory	IL12B	-0.1297	-0.65363	0.39423	-7.01309e-17	-0.487323	0.626415	0.694136	-7.30116
Phenotype	Classic .vs. Control	Vascular_Injury	CRP	0.0694466	-0.453763	0.592656	4.17455e-16	0.261293	0.794061	0.849788	-7.38572
Phenotype	Classic .vs. Control	Cytokine	IL15	-0.0620951	-0.565535	0.441345	1.55164e-16	-0.242807	0.808335	0.849788	-7.39038
Phenotype	Classic .vs. Control	Proinflammatory	IL10	-0.0284258	-0.508432	0.45158	1.23542e-16	-0.116578	0.907279	0.929961	-7.41306
Phenotype	Classic .vs. Control	Proinflammatory	IL13	0.0171345	-0.490907	0.525176	5.51698e-17	0.0663932	0.947113	0.947113	-7.41765
Phenotype	Classic .vs. Non Classic	Chemokine	CCL26	-0.649208	-1.24669	-0.0517302	-1.51081e-16	-2.13901	0.0333097	0.9773	-4.42286
Phenotype	Classic .vs. Non Classic	Cytokine	IL12A	0.402102	-0.228863	1.03307	-4.08231e-16	1.25454	0.210706	0.9773	-4.5694
Phenotype	Classic .vs. Non Classic	Cytokine	IL5	-0.379296	-0.983196	0.224603	-5.61382e-17	-1.23642	0.217351	0.9773	-4.57162
Phenotype	Classic .vs. Non Classic	Chemokine	CXCL8	0.349705	-0.257618	0.957029	-1.07009e-17	1.13353	0.257972	0.9773	-4.58366
Phenotype	Classic .vs. Non Classic	Cytokine	CSF2	-0.33665	-0.955928	0.282628	4.12432e-17	-1.07015	0.285485	0.9773	-4.59057
Phenotype	Classic .vs. Non Classic	Angiogenesis	VEGFD	-0.286773	-0.861371	0.287825	-4.7955e-16	-0.982486	0.326719	0.9773	-4.59947
Phenotype	Classic .vs. Non Classic	Proinflammatory	IL13	0.316619	-0.326845	0.960083	5.51698e-17	0.968644	0.333569	0.9773	-4.60081
Phenotype	Classic .vs. Non Classic	Proinflammatory	IFNG	0.283638	-0.335586	0.902863	-5.48354e-17	0.901713	0.367993	0.9773	-4.60702
Phenotype	Classic .vs. Non Classic	Proinflammatory	TNF	0.261374	-0.34596	0.868708	-1.54599e-16	0.847201	0.397615	0.9773	-4.61174
Phenotype	Classic .vs. Non Classic	Chemokine	CCL3	0.25629	-0.362516	0.875095	-1.52535e-16	0.815321	0.41559	0.9773	-4.61437
Phenotype	Classic .vs. Non Classic	Cytokine	IL17A	0.242258	-0.378723	0.863238	-8.10374e-17	0.767983	0.443152	0.9773	-4.6181
Phenotype	Classic .vs. Non Classic	Vascular_Injury	ICAM1	-0.236038	-0.875843	0.403767	7.19539e-16	-0.72625	0.4683	0.9773	-4.62119
Phenotype	Classic .vs. Non Classic	Cytokine	IL15	-0.220736	-0.858372	0.416899	1.55164e-16	-0.68148	0.496138	0.9773	-4.62432
Phenotype	Classic .vs. Non Classic	Proinflammatory	IL12B	-0.225846	-0.889433	0.437741	-7.01309e-17	-0.669987	0.503425	0.9773	-4.6251
Phenotype	Classic .vs. Non Classic	Proinflammatory	IL10	0.194817	-0.413138	0.802773	1.23542e-16	0.630824	0.528677	0.9773	-4.62763
Phenotype	Classic .vs. Non Classic	Chemokine	CCL22	-0.187606	-0.79736	0.422149	2.74249e-16	-0.605679	0.545224	0.9773	-4.62917
Phenotype	Classic .vs. Non Classic	Cytokine	VEGFA	0.150559	-0.359203	0.660322	-3.01939e-16	0.581422	0.561429	0.9773	-4.63061
Phenotype	Classic .vs. Non Classic	Angiogenesis	VEGFC	-0.130566	-0.617003	0.355872	7.61746e-17	-0.528389	0.597653	0.9773	-4.63354
Phenotype	Classic .vs. Non Classic	Angiogenesis	FLT1	-0.170992	-0.80965	0.467666	8.86632e-16	-0.527058	0.598576	0.9773	-4.63361
Phenotype	Classic .vs. Non Classic	Proinflammatory	IL4	-0.160638	-0.812597	0.491321	4.74018e-17	-0.485042	0.62803	0.9773	-4.63572
Phenotype	Classic .vs. Non Classic	Chemokine	CCL2	-0.155987	-0.80172	0.489745	9.81477e-17	-0.475542	0.634776	0.9773	-4.63618
Phenotype	Classic .vs. Non Classic	Vascular_Injury	CRP	-0.133909	-0.796584	0.528765	4.17455e-16	-0.397798	0.691086	0.9773	-4.63956
Phenotype	Classic .vs. Non Classic	Proinflammatory	IL6	-0.0891543	-0.742266	0.563958	6.72571e-17	-0.268724	0.788342	0.9773	-4.64384
Phenotype	Classic .vs. Non Classic	Cytokine	LTA	-0.0783737	-0.7338	0.577053	-4.4859e-17	-0.235396	0.814076	0.9773	-4.64468
Phenotype	Classic .vs. Non Classic	Cytokine	IL16	-0.0599994	-0.669843	0.549844	-1.96658e-16	-0.193678	0.84657	0.9773	-4.64557
Phenotype	Classic .vs. Non Classic	Cytokine	IL7	-0.0426279	-0.49404	0.408784	5.35605e-17	-0.185897	0.852662	0.9773	-4.64572
Phenotype	Classic .vs. Non Classic	Angiogenesis	PGF	-0.047746	-0.630854	0.535362	-4.4101e-16	-0.16119	0.872061	0.9773	-4.64615
Phenotype	Classic .vs. Non Classic	Chemokine	CXCL10	0.038986	-0.587181	0.665153	-2.7339e-16	0.122566	0.90254	0.9773	-4.64669
Phenotype	Classic .vs. Non Classic	Vascular_Injury	VCAM1	-0.0383377	-0.684317	0.607642	-2.33831e-16	-0.116831	0.907078	0.9773	-4.64676
Phenotype	Classic .vs. Non Classic	Chemokine	CCL13	0.0309104	-0.521346	0.583166	2.176e-16	0.110183	0.912344	0.9773	-4.64684
Phenotype	Classic .vs. Non Classic	Cytokine	IL1A	-0.0294877	-0.568486	0.50951	-6.50974e-17	-0.107697	0.914314	0.9773	-4.64686
Phenotype	Classic .vs. Non Classic	Angiogenesis	FGF2	-0.0220615	-0.478569	0.434446	-1.04703e-16	-0.0951349	0.924277	0.9773	-4.64699
Phenotype	Classic .vs. Non Classic	Vascular_Injury	SAA1	-0.0315697	-0.693445	0.630306	-6.15722e-17	-0.0938957	0.92526	0.9773	-4.647
Phenotype	Classic .vs. Non Classic	Proinflammatory	IL2	0.0189024	-0.641131	0.678936	1.79185e-17	0.0563771	0.955082	0.9773	-4.64728
Phenotype	Classic .vs. Non Classic	Chemokine	CCL4	-0.0147603	-0.58826	0.55874	1.92519e-16	-0.0506657	0.959628	0.9773	-4.64731
Phenotype	Classic .vs. Non Classic	Proinflammatory	IL1B	0.0159264	-0.615482	0.647335	-5.53509e-17	0.0496547	0.960433	0.9773	-4.64732
Phenotype	Classic .vs. Non Classic	Proinflammatory	CXCL8	0.0126196	-0.606325	0.631564	-8.03825e-17	0.0401369	0.968013	0.9773	-4.64736
Phenotype	Classic .vs. Non Classic	Angiogenesis	TEK	-0.012406	-0.643615	0.618803	-1.07048e-15	-0.038691	0.969165	0.9773	-4.64737
Phenotype	Classic .vs. Non Classic	Chemokine	CCL17	-0.00896538	-0.572723	0.554792	-1.00753e-16	-0.031306	0.975048	0.9773	-4.64739
Phenotype	Classic .vs. Non Classic	Chemokine	CCL11	0.00878577	-0.598495	0.616066	-1.9415e-16	0.0284801	0.9773	0.9773	-4.6474
Phenotype	Control .vs. Non Classic	Angiogenesis	FGF2	2.24951	1.84991	2.64911	-1.04703e-16	11.0818	7.31502e-24	2.99916e-22	43.4163
Phenotype	Control .vs. Non Classic	Cytokine	IL7	1.98373	1.58859	2.37887	5.35605e-17	9.88282	6.36293e-20	1.3044e-18	34.4473
Phenotype	Control .vs. Non Classic	Cytokine	VEGFA	1.92111	1.47489	2.36733	-3.01939e-16	8.47532	1.41418e-15	1.44953e-14	24.573
Phenotype	Control .vs. Non Classic	Angiogenesis	VEGFC	1.61313	1.18733	2.03893	7.61746e-17	7.45785	1.13752e-12	9.3277e-12	17.9946
Phenotype	Control .vs. Non Classic	Chemokine	CCL17	1.27006	0.776572	1.76354	-1.00753e-16	5.06642	7.41961e-07	5.07007e-06	4.94507
Phenotype	Control .vs. Non Classic	Chemokine	CCL13	1.21284	0.72942	1.69625	2.176e-16	4.93893	1.36083e-06	7.9706e-06	4.36083
Phenotype	Control .vs. Non Classic	Angiogenesis	PGF	1.21174	0.701318	1.72216	-4.4101e-16	4.67338	4.63207e-06	2.37394e-05	3.18423
Phenotype	Control .vs. Non Classic	Angiogenesis	VEGFD	1.08429	0.581318	1.58726	-4.7955e-16	4.24378	3.00205e-05	0.00013676	1.39931
Phenotype	Control .vs. Non Classic	Proinflammatory	CXCL8	1.10066	0.558866	1.64245	-8.03825e-17	3.99918	8.16191e-05	0.000334638	0.450493
Phenotype	Control .vs. Non Classic	Chemokine	CCL4	0.981747	0.479735	1.48376	1.92519e-16	3.84979	0.000146891	0.000547503	-0.104347
Phenotype	Control .vs. Non Classic	Proinflammatory	IL1B	0.855483	0.302781	1.40819	-5.53509e-17	3.047	0.00253465	0.00866005	-2.7548
Phenotype	Control .vs. Non Classic	Cytokine	IL12A	0.817581	0.265267	1.36989	-4.08231e-16	2.91405	0.00385915	0.0121712	-3.1384
Phenotype	Control .vs. Non Classic	Cytokine	IL16	0.770167	0.236341	1.30399	-1.96658e-16	2.84012	0.00484434	0.014187	-3.34473
Phenotype	Control .vs. Non Classic	Chemokine	CCL3	0.676454	0.134784	1.21812	-1.52535e-16	2.45842	0.014568	0.0398192	-4.33002
Phenotype	Control .vs. Non Classic	Cytokine	IL1A	0.569459	0.0976486	1.04127	-6.50974e-17	2.376	0.0181824	0.0465923	-4.52496
Phenotype	Control .vs. Non Classic	Chemokine	CCL11	0.628017	0.0964354	1.1596	-1.9415e-16	2.3257	0.0207576	0.0500625	-4.6408
Phenotype	Control .vs. Non Classic	Proinflammatory	IFNG	0.609426	0.067389	1.15146	-5.48354e-17	2.21332	0.0276916	0.0630753	-4.89098
Phenotype	Control .vs. Non Classic	Cytokine	CSF2	0.522197	-0.0198865	1.06428	4.12432e-17	1.89636	0.0589545	0.127218	-5.53194
Phenotype	Control .vs. Non Classic	Angiogenesis	FLT1	-0.510514	-1.06956	0.0485334	8.86632e-16	-1.79767	0.0733189	0.150304	-5.71184
Phenotype	Control .vs. Non Classic	Cytokine	IL17A	0.453938	-0.0896359	0.997512	-8.10374e-17	1.64395	0.101321	0.197818	-5.97336
Phenotype	Control .vs. Non Classic	Vascular_Injury	SAA1	0.461811	-0.11756	1.04118	-6.15722e-17	1.56913	0.11776	0.219462	-6.09236
Phenotype	Control .vs. Non Classic	Chemokine	CCL2	0.410354	-0.154887	0.975594	9.81477e-17	1.42915	0.15409	0.274682	-6.30036
Phenotype	Control .vs. Non Classic	Cytokine	LTA	0.342442	-0.231284	0.916169	-4.4859e-17	1.17499	0.241008	0.411722	-6.62901
Phenotype	Control .vs. Non Classic	Proinflammatory	IL13	0.299484	-0.26377	0.862739	5.51698e-17	1.0467	0.296153	0.485691	-6.77079
Phenotype	Control .vs. Non Classic	Chemokine	CXCL8	-0.244962	-0.776582	0.286657	-1.07009e-17	-0.907089	0.365149	0.575812	-6.9066
Phenotype	Control .vs. Non Classic	Cytokine	IL5	-0.232363	-0.760985	0.296258	-5.61382e-17	-0.865315	0.387615	0.579126	-6.94348
Phenotype	Control .vs. Non Classic	Angiogenesis	TEK	0.234306	-0.318221	0.786834	-1.07048e-15	0.834799	0.404551	0.579126	-6.96934
Phenotype	Control .vs. Non Classic	Proinflammatory	IL10	0.223243	-0.308929	0.755416	1.23542e-16	0.825806	0.409626	0.579126	-6.97678
Phenotype	Control .vs. Non Classic	Proinflammatory	IL4	0.229441	-0.34125	0.800132	4.74018e-17	0.791446	0.429362	0.580918	-7.00448
Phenotype	Control .vs. Non Classic	Chemokine	CXCL10	0.215677	-0.332437	0.763791	-2.7339e-16	0.774612	0.43923	0.580918	-7.01762
Phenotype	Control .vs. Non Classic	Proinflammatory	IL2	-0.21802	-0.795779	0.359739	1.79185e-17	-0.742851	0.458202	0.587071	-7.04165
Phenotype	Control .vs. Non Classic	Vascular_Injury	CRP	-0.203356	-0.783427	0.376715	4.17455e-16	-0.690125	0.490694	0.60965	-7.07933
Phenotype	Control .vs. Non Classic	Cytokine	IL15	-0.158641	-0.716794	0.399511	1.55164e-16	-0.559519	0.57626	0.694902	-7.16076
Phenotype	Control .vs. Non Classic	Proinflammatory	IL6	0.13706	-0.43464	0.708761	6.72571e-17	0.471949	0.637335	0.746593	-7.20585
Phenotype	Control .vs. Non Classic	Chemokine	CCL26	-0.0936893	-0.61669	0.429312	-1.51081e-16	-0.352646	0.724622	0.806768	-7.25497
Phenotype	Control .vs. Non Classic	Proinflammatory	IL12B	-0.0961465	-0.677016	0.484723	-7.01309e-17	-0.325842	0.74479	0.806768	-7.26405
Phenotype	Control .vs. Non Classic	Vascular_Injury	VCAM1	0.0924764	-0.47298	0.657933	-2.33831e-16	0.321946	0.747736	0.806768	-7.26531
Phenotype	Control .vs. Non Classic	Proinflammatory	TNF	0.056088	-0.47554	0.587716	-1.54599e-16	0.207689	0.835624	0.878477	-7.29554
Phenotype	Control .vs. Non Classic	Vascular_Injury	ICAM1	-0.0488992	-0.608951	0.511153	7.19539e-16	-0.17188	0.863658	0.885249	-7.30233
Phenotype	Control .vs. Non Classic	Chemokine	CCL22	-0.0220397	-0.555787	0.511708	2.74249e-16	-0.081287	0.935272	0.935272	-7.31379
Subgroup	Control Female .vs. Control Male	Angiogenesis	VEGFD	0.858544	0.486628	1.23046	-4.7955e-16	4.54463	8.27857e-06	0.000319208	3.26102
Subgroup	Control Female .vs. Control Male	Angiogenesis	FGF2	0.661863	0.365698	0.958028	-1.04703e-16	4.39962	1.55711e-05	0.000319208	2.66902
Subgroup	Control Female .vs. Control Male	Chemokine	CXCL8	-0.738003	-1.13007	-0.345934	-1.07009e-17	-3.70575	0.00025521	0.00273718	0.0704152
Subgroup	Control Female .vs. Control Male	Angiogenesis	VEGFC	0.587454	0.274344	0.900564	7.61746e-17	3.69367	0.000267042	0.00273718	0.0286836
Subgroup	Control Female .vs. Control Male	Cytokine	IL7	0.515965	0.223369	0.808561	5.35605e-17	3.47162	0.000601338	0.00493097	-0.716166
Subgroup	Control Female .vs. Control Male	Cytokine	CSF2	0.572492	0.172788	0.972196	4.12432e-17	2.81975	0.00515871	0.0302153	-2.65598
Subgroup	Control Female .vs. Control Male	Cytokine	VEGFA	0.456872	0.126757	0.786987	-3.01939e-16	2.72464	0.00685336	0.0351235	-2.90751
Subgroup	Control Female .vs. Control Male	Proinflammatory	IL13	-0.532434	-0.948464	-0.116404	5.51698e-17	-2.51954	0.0123228	0.0561372	-3.42205
Subgroup	Control Female .vs. Control Male	Proinflammatory	TNF	-0.495171	-0.888753	-0.10159	-1.54599e-16	-2.47686	0.0138613	0.0568313	-3.5243
Subgroup	Control Female .vs. Control Male	Vascular_Injury	SAA1	0.522751	0.0937031	0.951799	-6.15722e-17	2.39866	0.0171271	0.0638374	-3.70731
Subgroup	Control Female .vs. Control Male	Proinflammatory	CXCL8	0.435995	0.035016	0.836974	-8.03825e-17	2.14062	0.0331916	0.100651	-4.27119
Subgroup	Control Female .vs. Control Male	Chemokine	CCL4	0.399816	0.0278214	0.77181	1.92519e-16	2.11594	0.0352563	0.100651	-4.32188
Subgroup	Control Female .vs. Control Male	Chemokine	CCL13	0.382639	0.024739	0.74054	2.176e-16	2.10479	0.0362252	0.100651	-4.34461
Subgroup	Control Female .vs. Control Male	Cytokine	IL5	0.413703	0.0255003	0.801905	-5.61382e-17	2.09802	0.0368234	0.100651	-4.35833
Subgroup	Control Female .vs. Control Male	Proinflammatory	IL6	0.436444	0.0142368	0.858651	6.72571e-17	2.03509	0.0428093	0.109699	-4.48396
Subgroup	Control Female .vs. Control Male	Vascular_Injury	CRP	0.420679	-0.0082012	0.84956	4.17455e-16	1.93106	0.0545126	0.131472	-4.6835
Subgroup	Control Female .vs. Control Male	Proinflammatory	IFNG	0.373396	-0.0203452	0.767138	-5.48354e-17	1.86698	0.0629779	0.138663	-4.80134
Subgroup	Control Female .vs. Control Male	Proinflammatory	IL2	-0.400329	-0.828216	0.0275574	1.79185e-17	-1.84191	0.066574	0.138663	-4.84637
Subgroup	Control Female .vs. Control Male	Chemokine	CCL26	-0.35897	-0.744159	0.0262199	-1.51081e-16	-1.83469	0.0676407	0.138663	-4.85924
Subgroup	Control Female .vs. Control Male	Vascular_Injury	ICAM1	0.371966	-0.041623	0.785555	7.19539e-16	1.77058	0.0777487	0.151795	-4.97131
Subgroup	Control Female .vs. Control Male	Chemokine	CCL17	0.309205	-0.0566416	0.675051	-1.00753e-16	1.6639	0.0972809	0.181296	-5.14913
Subgroup	Control Female .vs. Control Male	Proinflammatory	IL1B	0.328593	-0.0810634	0.738248	-5.53509e-17	1.57913	0.115465	0.20164	-5.28272
Subgroup	Control Female .vs. Control Male	Proinflammatory	IL4	-0.336299	-0.75853	0.0859326	4.74018e-17	-1.56803	0.118033	0.20164	-5.2997
Subgroup	Control Female .vs. Control Male	Cytokine	IL1A	-0.256587	-0.604402	0.0912282	-6.50974e-17	-1.45233	0.147559	0.239079	-5.46974
Subgroup	Control Female .vs. Control Male	Angiogenesis	PGF	0.27508	-0.101548	0.651707	-4.4101e-16	1.43789	0.151611	0.239079	-5.49006
Subgroup	Control Female .vs. Control Male	Proinflammatory	IL12B	-0.28104	-0.710883	0.148803	-7.01309e-17	-1.28718	0.199123	0.302373	-5.69021
Subgroup	Control Female .vs. Control Male	Cytokine	IL16	-0.233675	-0.628943	0.161592	-1.96658e-16	-1.16386	0.245497	0.359478	-5.8377
Subgroup	Control Female .vs. Control Male	Angiogenesis	FLT1	-0.229915	-0.644246	0.184416	8.86632e-16	-1.09245	0.275601	0.389643	-5.9164
Subgroup	Control Female .vs. Control Male	Cytokine	IL12A	-0.201692	-0.609898	0.206515	-4.08231e-16	-0.972722	0.331554	0.453124	-6.03725
Subgroup	Control Female .vs. Control Male	Chemokine	CCL2	0.200665	-0.217811	0.61914	9.81477e-17	0.944021	0.345995	0.457606	-6.06416
Subgroup	Control Female .vs. Control Male	Chemokine	CCL11	0.147766	-0.2461	0.541631	-1.9415e-16	0.738594	0.460789	0.57832	-6.23332
Subgroup	Control Female .vs. Control Male	Chemokine	CCL22	-0.146825	-0.542309	0.24866	2.74249e-16	-0.730885	0.465477	0.57832	-6.23887
Subgroup	Control Female .vs. Control Male	Vascular_Injury	VCAM1	0.0919479	-0.327143	0.511039	-2.33831e-16	0.431931	0.666133	0.793195	-6.40923
Subgroup	Control Female .vs. Control Male	Cytokine	LTA	0.0897723	-0.334208	0.513752	-4.4859e-17	0.416848	0.677118	0.793195	-6.41551
Subgroup	Control Female .vs. Control Male	Chemokine	CCL3	-0.0788737	-0.478652	0.320905	-1.52535e-16	-0.388413	0.698014	0.79496	-6.42674
Subgroup	Control Female .vs. Control Male	Chemokine	CXCL10	-0.0378342	-0.444035	0.368366	-2.7339e-16	-0.183368	0.854645	0.940749	-6.48426
Subgroup	Control Female .vs. Control Male	Angiogenesis	TEK	0.0264922	-0.382878	0.435862	-1.07048e-15	0.127404	0.898715	0.940749	-6.49279
Subgroup	Control Female .vs. Control Male	Cytokine	IL15	-0.0249885	-0.437011	0.387034	1.55164e-16	-0.119399	0.905047	0.940749	-6.49376
Subgroup	Control Female .vs. Control Male	Cytokine	IL17A	-0.0154296	-0.41666	0.3858	-8.10374e-17	-0.0757081	0.939707	0.940749	-6.49794
Subgroup	Control Female .vs. Control Male	Proinflammatory	IL10	0.0148756	-0.378763	0.408514	1.23542e-16	0.0743975	0.940749	0.940749	-6.49804
Subgroup	Control Female .vs. Fabry Non Treated Classic Female	Angiogenesis	FGF2	2.35116	1.85851	2.84382	-1.04703e-16	9.39549	2.39316e-18	9.81197e-17	30.9764
Subgroup	Control Female .vs. Fabry Non Treated Classic Female	Cytokine	IL7	1.93615	1.44943	2.42287	5.35605e-17	7.83142	1.07796e-13	2.20982e-12	20.4488
Subgroup	Control Female .vs. Fabry Non Treated Classic Female	Cytokine	VEGFA	1.79215	1.24302	2.34128	-3.01939e-16	6.4251	5.85158e-10	5.99787e-09	12.0438
Subgroup	Control Female .vs. Fabry Non Treated Classic Female	Angiogenesis	VEGFC	1.41021	0.889371	1.93106	7.61746e-17	5.33039	2.05704e-07	1.68678e-06	6.3589
Subgroup	Control Female .vs. Fabry Non Treated Classic Female	Chemokine	CCL17	1.34046	0.73189	1.94902	-1.00753e-16	4.33635	2.04093e-05	0.000139464	1.95208
Subgroup	Control Female .vs. Fabry Non Treated Classic Female	Angiogenesis	VEGFD	1.22162	0.602955	1.84028	-4.7955e-16	3.88742	0.000127308	0.000745664	0.219881
Subgroup	Control Female .vs. Fabry Non Treated Classic Female	Chemokine	CCL13	1.09817	0.502816	1.69352	2.176e-16	3.63142	0.00033664	0.00172528	-0.692122
Subgroup	Control Female .vs. Fabry Non Treated Classic Female	Angiogenesis	PGF	0.941434	0.314932	1.56794	-4.4101e-16	2.95834	0.00336441	0.0153268	-2.8174
Subgroup	Control Female .vs. Fabry Non Treated Classic Female	Chemokine	CCL4	0.917899	0.299104	1.53669	1.92519e-16	2.92031	0.00378917	0.0155356	-2.92542
Subgroup	Control Female .vs. Fabry Non Treated Classic Female	Proinflammatory	CXCL8	0.911481	0.244473	1.57849	-8.03825e-17	2.69028	0.00757997	0.0282526	-3.55068
Subgroup	Control Female .vs. Fabry Non Treated Classic Female	Chemokine	CXCL8	-0.877805	-1.52999	-0.225617	-1.07009e-17	-2.64976	0.0085254	0.0291284	-3.65579
Subgroup	Control Female .vs. Fabry Non Treated Classic Female	Proinflammatory	IL1B	0.891244	0.209802	1.57269	-5.53509e-17	2.57483	0.0105569	0.0332948	-3.84616
Subgroup	Control Female .vs. Fabry Non Treated Classic Female	Cytokine	CSF2	0.842574	0.177685	1.50746	4.12432e-17	2.49482	0.0131941	0.0386399	-4.04369
Subgroup	Control Female .vs. Fabry Non Treated Classic Female	Cytokine	IL16	0.823626	0.166118	1.48113	-1.96658e-16	2.46609	0.0142754	0.0390193	-4.11317
Subgroup	Control Female .vs. Fabry Non Treated Classic Female	Cytokine	IL1A	0.541402	-0.0371712	1.11998	-6.50974e-17	1.84222	0.0665286	0.17048	-5.43019
Subgroup	Control Female .vs. Fabry Non Treated Classic Female	Proinflammatory	IFNG	0.568265	-0.0867046	1.22323	-5.48354e-17	1.70809	0.0887584	0.208102	-5.66488
Subgroup	Control Female .vs. Fabry Non Treated Classic Female	Chemokine	CCL26	0.551415	-0.0893288	1.19216	-1.51081e-16	1.69424	0.091362	0.208102	-5.68813
Subgroup	Control Female .vs. Fabry Non Treated Classic Female	Proinflammatory	IL4	0.563641	-0.13872	1.266	4.74018e-17	1.57987	0.115295	0.248795	-5.87298
Subgroup	Control Female .vs. Fabry Non Treated Classic Female	Chemokine	CCL11	0.498313	-0.156863	1.15349	-1.9415e-16	1.49735	0.135458	0.277689	-5.99848
Subgroup	Control Female .vs. Fabry Non Treated Classic Female	Cytokine	LTA	0.500823	-0.204447	1.20609	-4.4859e-17	1.39801	0.163247	0.308959	-6.14079
Subgroup	Control Female .vs. Fabry Non Treated Classic Female	Chemokine	CCL2	0.49135	-0.204763	1.18746	9.81477e-17	1.3896	0.165783	0.308959	-6.15238
Subgroup	Control Female .vs. Fabry Non Treated Classic Female	Cytokine	IL17A	0.367725	-0.299701	1.03515	-8.10374e-17	1.08468	0.279024	0.49739	-6.52639
Subgroup	Control Female .vs. Fabry Non Treated Classic Female	Cytokine	IL12A	0.351813	-0.327218	1.03084	-4.08231e-16	1.02001	0.30863	0.527243	-6.59398
Subgroup	Control Female .vs. Fabry Non Treated Classic Female	Vascular_Injury	SAA1	0.347209	-0.366491	1.06091	-6.15722e-17	0.957758	0.339033	0.536087	-6.65513
Subgroup	Control Female .vs. Fabry Non Treated Classic Female	Proinflammatory	IL12B	0.342174	-0.372849	1.0572	-7.01309e-17	0.942122	0.346964	0.536087	-6.6699
Subgroup	Control Female .vs. Fabry Non Treated Classic Female	Proinflammatory	IL6	0.331882	-0.370439	1.0342	6.72571e-17	0.930312	0.353033	0.536087	-6.68088
Subgroup	Control Female .vs. Fabry Non Treated Classic Female	Vascular_Injury	ICAM1	0.308126	-0.379859	0.996111	7.19539e-16	0.881717	0.378707	0.542297	-6.72465
Subgroup	Control Female .vs. Fabry Non Treated Classic Female	Angiogenesis	FLT1	-0.294979	-0.984198	0.394239	8.86632e-16	-0.842587	0.400198	0.542297	-6.7582
Subgroup	Control Female .vs. Fabry Non Treated Classic Female	Chemokine	CCL3	0.28198	-0.383031	0.946991	-1.52535e-16	0.834775	0.404575	0.542297	-6.76472
Subgroup	Control Female .vs. Fabry Non Treated Classic Female	Proinflammatory	IL13	0.290046	-0.402	0.982092	5.51698e-17	0.825112	0.410029	0.542297	-6.77269
Subgroup	Control Female .vs. Fabry Non Treated Classic Female	Proinflammatory	TNF	-0.240269	-0.894973	0.414434	-1.54599e-16	-0.722493	0.470611	0.60297	-6.8517
Subgroup	Control Female .vs. Fabry Non Treated Classic Female	Chemokine	CXCL10	0.239628	-0.436067	0.915322	-2.7339e-16	0.698179	0.485661	0.603396	-6.86889
Subgroup	Control Female .vs. Fabry Non Treated Classic Female	Proinflammatory	IL10	0.166899	-0.4879	0.821697	1.23542e-16	0.501794	0.616217	0.731044	-6.98621
Subgroup	Control Female .vs. Fabry Non Treated Classic Female	Angiogenesis	TEK	0.169717	-0.511249	0.850683	-1.07048e-15	0.490659	0.624062	0.731044	-6.99172
Subgroup	Control Female .vs. Fabry Non Treated Classic Female	Proinflammatory	IL2	-0.159296	-0.871064	0.552472	1.79185e-17	-0.440603	0.65985	0.743528	-7.01494
Subgroup	Control Female .vs. Fabry Non Treated Classic Female	Vascular_Injury	VCAM1	0.150586	-0.546551	0.847722	-2.33831e-16	0.425252	0.670989	0.743528	-7.02156
Subgroup	Control Female .vs. Fabry Non Treated Classic Female	Chemokine	CCL22	0.111456	-0.546414	0.769326	2.74249e-16	0.333537	0.738985	0.797326	-7.05624
Subgroup	Control Female .vs. Fabry Non Treated Classic Female	Cytokine	IL5	0.0750006	-0.570755	0.720756	-5.61382e-17	0.228653	0.81931	0.84236	-7.08563
Subgroup	Control Female .vs. Fabry Non Treated Classic Female	Vascular_Injury	CRP	0.0816913	-0.63173	0.795113	4.17455e-16	0.225429	0.821814	0.84236	-7.08636
Subgroup	Control Female .vs. Fabry Non Treated Classic Female	Cytokine	IL15	0.0207611	-0.664618	0.70614	1.55164e-16	0.0596348	0.95249	0.95249	-7.10992
Subgroup	Control Female .vs. Fabry Non Treated Classic Male	Cytokine	IL7	2.11064	1.14874	3.07253	5.35605e-17	4.31984	2.18916e-05	0.000897556	2.38452
Subgroup	Control Female .vs. Fabry Non Treated Classic Male	Angiogenesis	FGF2	1.99555	1.02192	2.96917	-1.04703e-16	4.03508	7.09502e-05	0.00145448	1.29223
Subgroup	Control Female .vs. Fabry Non Treated Classic Male	Cytokine	VEGFA	2.0803	0.995065	3.16553	-3.01939e-16	3.77384	0.000197263	0.00269592	0.348302
Subgroup	Control Female .vs. Fabry Non Treated Classic Male	Angiogenesis	VEGFC	1.41873	0.389403	2.44806	7.61746e-17	2.71348	0.00708216	0.0580737	-2.88618
Subgroup	Control Female .vs. Fabry Non Treated Classic Male	Chemokine	CCL26	1.60017	0.333888	2.86646	-1.51081e-16	2.4878	0.0134514	0.0919178	-3.44624
Subgroup	Control Female .vs. Fabry Non Treated Classic Male	Chemokine	CCL17	1.36886	0.166166	2.57156	-1.00753e-16	2.2407	0.0258508	0.151412	-4.00614
Subgroup	Control Female .vs. Fabry Non Treated Classic Male	Angiogenesis	PGF	1.32446	0.0863191	2.5626	-4.4101e-16	2.10596	0.0361225	0.185128	-4.28771
Subgroup	Control Female .vs. Fabry Non Treated Classic Male	Chemokine	CCL13	1.18835	0.0117737	2.36492	2.176e-16	1.9884	0.0477668	0.217604	-4.51955
Subgroup	Control Female .vs. Fabry Non Treated Classic Male	Chemokine	CCL4	1.20497	-0.0179359	2.42788	1.92519e-16	1.93983	0.0534317	0.21907	-4.61158
Subgroup	Control Female .vs. Fabry Non Treated Classic Male	Cytokine	CSF2	1.22386	-0.0901436	2.53786	4.12432e-17	1.83365	0.0677966	0.252697	-4.80504
Subgroup	Control Female .vs. Fabry Non Treated Classic Male	Cytokine	IL16	1.01301	-0.286409	2.31242	-1.96658e-16	1.53477	0.125999	0.430496	-5.29238
Subgroup	Control Female .vs. Fabry Non Treated Classic Male	Angiogenesis	VEGFD	0.89085	-0.331799	2.1135	-4.7955e-16	1.43444	0.152592	0.481252	-5.43695
Subgroup	Control Female .vs. Fabry Non Treated Classic Male	Cytokine	IL5	0.862613	-0.413577	2.1388	-5.61382e-17	1.3307	0.184399	0.540025	-5.5763
Subgroup	Control Female .vs. Fabry Non Treated Classic Male	Proinflammatory	CXCL8	0.833234	-0.484958	2.15143	-8.03825e-17	1.24442	0.214412	0.549675	-5.68434
Subgroup	Control Female .vs. Fabry Non Treated Classic Male	Cytokine	IL17A	0.816824	-0.502193	2.13584	-8.10374e-17	1.21915	0.22384	0.549675	-5.71463
Subgroup	Control Female .vs. Fabry Non Treated Classic Male	Vascular_Injury	SAA1	0.847037	-0.563431	2.25751	-6.15722e-17	1.18228	0.238125	0.549675	-5.75772
Subgroup	Control Female .vs. Fabry Non Treated Classic Male	Cytokine	LTA	0.831346	-0.56246	2.22515	-4.4859e-17	1.17425	0.241321	0.549675	-5.76694
Subgroup	Control Female .vs. Fabry Non Treated Classic Male	Proinflammatory	IL4	0.735613	-0.652445	2.12367	4.74018e-17	1.04333	0.297719	0.622159	-5.90833
Subgroup	Control Female .vs. Fabry Non Treated Classic Male	Cytokine	IL1A	0.598757	-0.544663	1.74218	-6.50974e-17	1.03092	0.303492	0.622159	-5.92088
Subgroup	Control Female .vs. Fabry Non Treated Classic Male	Proinflammatory	IL1B	0.667344	-0.679373	2.01406	-5.53509e-17	0.975559	0.330148	0.644574	-5.97502
Subgroup	Control Female .vs. Fabry Non Treated Classic Male	Chemokine	CCL11	0.598101	-0.696705	1.89291	-1.9415e-16	0.90939	0.363947	0.676896	-6.03585
Subgroup	Control Female .vs. Fabry Non Treated Classic Male	Angiogenesis	TEK	0.601444	-0.744333	1.94722	-1.07048e-15	0.879838	0.379722	0.676896	-6.06164
Subgroup	Control Female .vs. Fabry Non Treated Classic Male	Cytokine	IL15	0.572777	-0.78172	1.92727	1.55164e-16	0.832507	0.405851	0.69333	-6.10119
Subgroup	Control Female .vs. Fabry Non Treated Classic Male	Chemokine	CXCL8	-0.494436	-1.78334	0.794466	-1.07009e-17	-0.755215	0.450772	0.739266	-6.16109
Subgroup	Control Female .vs. Fabry Non Treated Classic Male	Chemokine	CCL3	0.464976	-0.849269	1.77922	-1.52535e-16	0.696521	0.486696	0.763728	-6.2027
Subgroup	Control Female .vs. Fabry Non Treated Classic Male	Proinflammatory	IL12B	0.459835	-0.953245	1.87292	-7.01309e-17	0.640643	0.522293	0.763728	-6.2392
Subgroup	Control Female .vs. Fabry Non Treated Classic Male	Proinflammatory	IL6	-0.435823	-1.8238	0.952156	6.72571e-17	-0.618169	0.53698	0.763728	-6.25302
Subgroup	Control Female .vs. Fabry Non Treated Classic Male	Proinflammatory	IL13	0.420055	-0.947617	1.78773	5.51698e-17	0.604651	0.545914	0.763728	-6.2611
Subgroup	Control Female .vs. Fabry Non Treated Classic Male	Cytokine	IL12A	0.39897	-0.942982	1.74092	-4.08231e-16	0.585307	0.558826	0.763728	-6.27234
Subgroup	Control Female .vs. Fabry Non Treated Classic Male	Chemokine	CCL22	0.359673	-0.940458	1.6598	2.74249e-16	0.54463	0.586453	0.77348	-6.29481
Subgroup	Control Female .vs. Fabry Non Treated Classic Male	Angiogenesis	FLT1	-0.359567	-1.72165	1.00252	8.86632e-16	-0.519704	0.603692	0.77348	-6.30777
Subgroup	Control Female .vs. Fabry Non Treated Classic Male	Proinflammatory	IL10	-0.244708	-1.53877	1.04935	1.23542e-16	-0.372283	0.709971	0.862358	-6.37207
Subgroup	Control Female .vs. Fabry Non Treated Classic Male	Chemokine	CXCL10	0.247821	-1.08754	1.58318	-2.7339e-16	0.365359	0.715127	0.862358	-6.37456
Subgroup	Control Female .vs. Fabry Non Treated Classic Male	Vascular_Injury	VCAM1	0.213959	-1.16377	1.59169	-2.33831e-16	0.305735	0.76004	0.890332	-6.39413
Subgroup	Control Female .vs. Fabry Non Treated Classic Male	Proinflammatory	IL2	-0.196305	-1.60295	1.21034	1.79185e-17	-0.274743	0.783722	0.892572	-6.40293
Subgroup	Control Female .vs. Fabry Non Treated Classic Male	Chemokine	CCL2	0.124025	-1.25169	1.49974	9.81477e-17	0.177485	0.859259	0.916629	-6.42445
Subgroup	Control Female .vs. Fabry Non Treated Classic Male	Proinflammatory	IFNG	-0.106733	-1.40113	1.18767	-5.48354e-17	-0.162335	0.871162	0.916629	-6.42697
Subgroup	Control Female .vs. Fabry Non Treated Classic Male	Vascular_Injury	CRP	0.115573	-1.29434	1.52549	4.17455e-16	0.161378	0.871916	0.916629	-6.42712
Subgroup	Control Female .vs. Fabry Non Treated Classic Male	Vascular_Injury	ICAM1	0.0560591	-1.30359	1.41571	7.19539e-16	0.0811709	0.935366	0.95875	-6.43664
Subgroup	Control Female .vs. Fabry Non Treated Classic Male	Proinflammatory	TNF	0.0152873	-1.27859	1.30916	-1.54599e-16	0.0232605	0.981459	0.981459	-6.4396
Subgroup	Control Female .vs. Fabry Non Treated Non Classic Female	Angiogenesis	FGF2	2.25627	1.76362	2.74893	-1.04703e-16	9.0163	3.53712e-17	1.45022e-15	28.3266
Subgroup	Control Female .vs. Fabry Non Treated Non Classic Female	Cytokine	IL7	1.88841	1.4017	2.37513	5.35605e-17	7.63835	3.74123e-13	7.66952e-12	19.2295
Subgroup	Control Female .vs. Fabry Non Treated Non Classic Female	Cytokine	VEGFA	1.85404	1.30491	2.40317	-3.01939e-16	6.64698	1.62426e-10	1.66487e-09	13.2926
Subgroup	Control Female .vs. Fabry Non Treated Non Classic Female	Angiogenesis	VEGFC	1.7117	1.19086	2.23255	7.61746e-17	6.46997	4.52631e-10	3.71157e-09	12.2939
Subgroup	Control Female .vs. Fabry Non Treated Non Classic Female	Chemokine	CCL17	1.30231	0.693746	1.91088	-1.00753e-16	4.21296	3.42903e-05	0.000234317	1.45938
Subgroup	Control Female .vs. Fabry Non Treated Non Classic Female	Angiogenesis	PGF	1.29812	0.671619	1.92462	-4.4101e-16	4.07918	5.93824e-05	0.000347811	0.939357
Subgroup	Control Female .vs. Fabry Non Treated Non Classic Female	Chemokine	CCL13	1.07804	0.482695	1.67339	2.176e-16	3.56488	0.000429703	0.00220223	-0.919943
Subgroup	Control Female .vs. Fabry Non Treated Non Classic Female	Proinflammatory	CXCL8	1.11776	0.450753	1.78477	-8.03825e-17	3.29912	0.00109889	0.00500607	-1.79145
Subgroup	Control Female .vs. Fabry Non Treated Non Classic Female	Angiogenesis	VEGFD	0.958201	0.339537	1.57686	-4.7955e-16	3.04917	0.00252038	0.0103336	-2.55412
Subgroup	Control Female .vs. Fabry Non Treated Non Classic Female	Chemokine	CCL4	0.900755	0.28196	1.51955	1.92519e-16	2.86576	0.00448418	0.0167138	-3.07805
Subgroup	Control Female .vs. Fabry Non Treated Non Classic Female	Proinflammatory	IFNG	0.907559	0.25259	1.56253	-5.48354e-17	2.72794	0.0067871	0.0231893	-3.45162
Subgroup	Control Female .vs. Fabry Non Treated Non Classic Female	Proinflammatory	IL1B	0.863336	0.181894	1.54478	-5.53509e-17	2.4942	0.0132167	0.0416836	-4.0452
Subgroup	Control Female .vs. Fabry Non Treated Non Classic Female	Chemokine	CCL3	0.777488	0.112477	1.4425	-1.52535e-16	2.30168	0.0221074	0.064743	-4.49594
Subgroup	Control Female .vs. Fabry Non Treated Non Classic Female	Cytokine	IL16	0.698591	0.0410831	1.3561	-1.96658e-16	2.09171	0.0373893	0.102198	-4.94778
Subgroup	Control Female .vs. Fabry Non Treated Non Classic Female	Cytokine	IL12A	0.675709	-0.00332207	1.35474	-4.08231e-16	1.95907	0.0511235	0.131004	-5.21166
Subgroup	Control Female .vs. Fabry Non Treated Non Classic Female	Cytokine	IL5	-0.632873	-1.27863	0.0128827	-5.61382e-17	-1.92943	0.0547154	0.131961	-5.26834
Subgroup	Control Female .vs. Fabry Non Treated Non Classic Female	Chemokine	CCL11	0.606238	-0.0489375	1.26141	-1.9415e-16	1.82165	0.0696033	0.158541	-5.4673
Subgroup	Control Female .vs. Fabry Non Treated Non Classic Female	Cytokine	IL17A	0.567439	-0.0999874	1.23486	-8.10374e-17	1.67377	0.0953225	0.205696	-5.72214
Subgroup	Control Female .vs. Fabry Non Treated Non Classic Female	Cytokine	IL1A	0.468293	-0.110281	1.04687	-6.50974e-17	1.59345	0.112217	0.230045	-5.85169
Subgroup	Control Female .vs. Fabry Non Treated Non Classic Female	Angiogenesis	FLT1	-0.442849	-1.13207	0.246369	8.86632e-16	-1.26497	0.206963	0.404071	-6.31627
Subgroup	Control Female .vs. Fabry Non Treated Non Classic Female	Vascular_Injury	SAA1	0.427426	-0.286274	1.14113	-6.15722e-17	1.17903	0.239413	0.446179	-6.4204
Subgroup	Control Female .vs. Fabry Non Treated Non Classic Female	Cytokine	IL15	-0.395101	-1.08048	0.290278	1.55164e-16	-1.1349	0.257414	0.458869	-6.47107
Subgroup	Control Female .vs. Fabry Non Treated Non Classic Female	Chemokine	CCL2	0.298786	-0.397328	0.994899	9.81477e-17	0.845006	0.398848	0.681366	-6.75617
Subgroup	Control Female .vs. Fabry Non Treated Non Classic Female	Cytokine	CSF2	0.267891	-0.396997	0.93278	4.12432e-17	0.793214	0.428343	0.685184	-6.79837
Subgroup	Control Female .vs. Fabry Non Treated Non Classic Female	Proinflammatory	IL2	-0.282964	-0.994732	0.428805	1.79185e-17	-0.782658	0.434507	0.685184	-6.80664
Subgroup	Control Female .vs. Fabry Non Treated Non Classic Female	Chemokine	CXCL10	0.245891	-0.429804	0.921586	-2.7339e-16	0.716428	0.474341	0.704981	-6.85604
Subgroup	Control Female .vs. Fabry Non Treated Non Classic Female	Proinflammatory	IL6	0.251482	-0.450839	0.953802	6.72571e-17	0.704939	0.48145	0.704981	-6.86417
Subgroup	Control Female .vs. Fabry Non Treated Non Classic Female	Chemokine	CCL26	-0.218134	-0.858878	0.422609	-1.51081e-16	-0.670224	0.503282	0.711537	-6.88792
Subgroup	Control Female .vs. Fabry Non Treated Non Classic Female	Proinflammatory	IL13	0.219104	-0.472942	0.911149	5.51698e-17	0.623297	0.533611	0.711999	-6.91814
Subgroup	Control Female .vs. Fabry Non Treated Non Classic Female	Proinflammatory	TNF	0.20104	-0.453663	0.855744	-1.54599e-16	0.604532	0.545993	0.711999	-6.92961
Subgroup	Control Female .vs. Fabry Non Treated Non Classic Female	Proinflammatory	IL4	0.210476	-0.491885	0.912837	4.74018e-17	0.58996	0.555706	0.711999	-6.93828
Subgroup	Control Female .vs. Fabry Non Treated Non Classic Female	Proinflammatory	IL10	0.179197	-0.475601	0.833996	1.23542e-16	0.538771	0.590485	0.724613	-6.96705
Subgroup	Control Female .vs. Fabry Non Treated Non Classic Female	Vascular_Injury	ICAM1	0.179625	-0.50836	0.86761	7.19539e-16	0.514005	0.607665	0.724613	-6.98004
Subgroup	Control Female .vs. Fabry Non Treated Non Classic Female	Vascular_Injury	VCAM1	0.170701	-0.526435	0.867838	-2.33831e-16	0.482058	0.630151	0.724613	-6.99589
Subgroup	Control Female .vs. Fabry Non Treated Non Classic Female	Cytokine	LTA	0.169622	-0.535648	0.874892	-4.4859e-17	0.473486	0.636245	0.724613	-6.99997
Subgroup	Control Female .vs. Fabry Non Treated Non Classic Female	Angiogenesis	TEK	0.152557	-0.528409	0.833523	-1.07048e-15	0.441049	0.659527	0.730827	-7.01475
Subgroup	Control Female .vs. Fabry Non Treated Non Classic Female	Chemokine	CCL22	-0.111769	-0.769639	0.546101	2.74249e-16	-0.334474	0.738279	0.796565	-7.05593
Subgroup	Control Female .vs. Fabry Non Treated Non Classic Female	Chemokine	CXCL8	-0.0952279	-0.747415	0.55696	-1.07009e-17	-0.287456	0.773981	0.813673	-7.0705
Subgroup	Control Female .vs. Fabry Non Treated Non Classic Female	Proinflammatory	IL12B	-0.0672924	-0.782315	0.64773	-7.01309e-17	-0.185279	0.853148	0.874476	-7.09458
Subgroup	Control Female .vs. Fabry Non Treated Non Classic Female	Vascular_Injury	CRP	0.00895925	-0.704462	0.722381	4.17455e-16	0.0247233	0.980294	0.980294	-7.11139
Subgroup	Control Female .vs. Fabry Non Treated Non Classic Male	Angiogenesis	FGF2	2.1704	1.36684	2.97395	-1.04703e-16	5.31746	2.19379e-07	8.99455e-06	6.62991
Subgroup	Control Female .vs. Fabry Non Treated Non Classic Male	Cytokine	IL7	1.86615	1.07228	2.66002	5.35605e-17	4.62782	5.72019e-06	0.000117264	3.53429
Subgroup	Control Female .vs. Fabry Non Treated Non Classic Male	Angiogenesis	VEGFC	1.66032	0.810789	2.50985	7.61746e-17	3.84763	0.000148589	0.00203071	0.479357
Subgroup	Control Female .vs. Fabry Non Treated Non Classic Male	Cytokine	VEGFA	1.41836	0.522688	2.31402	-3.01939e-16	3.11759	0.00201847	0.0165515	-1.91892
Subgroup	Control Female .vs. Fabry Non Treated Non Classic Male	Chemokine	CCL17	1.42769	0.435078	2.4203	-1.00753e-16	2.83162	0.00497649	0.034006	-2.73116
Subgroup	Control Female .vs. Fabry Non Treated Non Classic Male	Proinflammatory	IFNG	-1.47048	-2.53878	-0.402186	-5.48354e-17	-2.70987	0.00715763	0.0419233	-3.05464
Subgroup	Control Female .vs. Fabry Non Treated Non Classic Male	Chemokine	CCL13	1.27795	0.306892	2.249	2.176e-16	2.59089	0.010088	0.051701	-3.35775
Subgroup	Control Female .vs. Fabry Non Treated Non Classic Male	Angiogenesis	VEGFD	1.24628	0.237198	2.25536	-4.7955e-16	2.43147	0.0156821	0.0714406	-3.74357
Subgroup	Control Female .vs. Fabry Non Treated Non Classic Male	Cytokine	IL1A	1.14522	0.201524	2.08891	-6.50974e-17	2.38912	0.0175691	0.0720332	-3.84214
Subgroup	Control Female .vs. Fabry Non Treated Non Classic Male	Chemokine	CCL4	1.07559	0.0662992	2.08489	1.92519e-16	2.09803	0.0368234	0.137251	-4.47445
Subgroup	Control Female .vs. Fabry Non Treated Non Classic Male	Proinflammatory	CXCL8	1.05335	-0.0345807	2.14129	-8.03825e-17	1.90613	0.0576852	0.197091	-4.84784
Subgroup	Control Female .vs. Fabry Non Treated Non Classic Male	Angiogenesis	PGF	0.934562	-0.0873038	1.95643	-4.4101e-16	1.80051	0.072886	0.229871	-5.03849
Subgroup	Control Female .vs. Fabry Non Treated Non Classic Male	Proinflammatory	IL1B	0.975483	-0.135995	2.08696	-5.53509e-17	1.72782	0.0851525	0.249375	-5.16352
Subgroup	Control Female .vs. Fabry Non Treated Non Classic Male	Cytokine	IL16	0.573756	-0.498683	1.6462	-1.96658e-16	1.05326	0.293155	0.780899	-6.08181
Subgroup	Control Female .vs. Fabry Non Treated Non Classic Male	Chemokine	CCL11	0.532289	-0.536346	1.60092	-1.9415e-16	0.980615	0.327652	0.780899	-6.1544
Subgroup	Control Female .vs. Fabry Non Treated Non Classic Male	Chemokine	CCL2	0.536087	-0.59932	1.67149	9.81477e-17	0.929532	0.353436	0.780899	-6.20237
Subgroup	Control Female .vs. Fabry Non Treated Non Classic Male	Proinflammatory	IL6	0.537469	-0.608062	1.683	6.72571e-17	0.923691	0.356464	0.780899	-6.20769
Subgroup	Control Female .vs. Fabry Non Treated Non Classic Male	Cytokine	IL15	-0.518616	-1.63651	0.599282	1.55164e-16	-0.913322	0.36188	0.780899	-6.21705
Subgroup	Control Female .vs. Fabry Non Treated Non Classic Male	Angiogenesis	FLT1	-0.465382	-1.58954	0.658779	8.86632e-16	-0.815008	0.415779	0.847564	-6.30063
Subgroup	Control Female .vs. Fabry Non Treated Non Classic Male	Chemokine	CCL26	0.41583	-0.629266	1.46093	-1.51081e-16	0.783321	0.434118	0.847564	-6.32555
Subgroup	Control Female .vs. Fabry Non Treated Non Classic Male	Proinflammatory	TNF	-0.395644	-1.46351	0.672221	-1.54599e-16	-0.729405	0.46638	0.869163	-6.36569
Subgroup	Control Female .vs. Fabry Non Treated Non Classic Male	Cytokine	CSF2	0.378953	-0.705524	1.46343	4.12432e-17	0.687932	0.492081	0.877187	-6.39463
Subgroup	Control Female .vs. Fabry Non Treated Non Classic Male	Vascular_Injury	ICAM1	-0.276016	-1.39816	0.846134	7.19539e-16	-0.484243	0.628602	0.997018	-6.51224
Subgroup	Control Female .vs. Fabry Non Treated Non Classic Male	Vascular_Injury	SAA1	0.285618	-0.878475	1.44971	-6.15722e-17	0.483035	0.629459	0.997018	-6.51281
Subgroup	Control Female .vs. Fabry Non Treated Non Classic Male	Cytokine	IL12A	0.233646	-0.873899	1.34119	-4.08231e-16	0.415314	0.678238	0.997018	-6.54279
Subgroup	Control Female .vs. Fabry Non Treated Non Classic Male	Proinflammatory	IL12B	-0.232747	-1.399	0.933502	-7.01309e-17	-0.392891	0.694707	0.997018	-6.55173
Subgroup	Control Female .vs. Fabry Non Treated Non Classic Male	Proinflammatory	IL10	-0.207693	-1.27571	0.860327	1.23542e-16	-0.382845	0.702133	0.997018	-6.55557
Subgroup	Control Female .vs. Fabry Non Treated Non Classic Male	Vascular_Injury	CRP	0.199853	-0.963785	1.36349	4.17455e-16	0.338122	0.735531	0.997018	-6.57147
Subgroup	Control Female .vs. Fabry Non Treated Non Classic Male	Angiogenesis	TEK	0.143241	-0.96746	1.25394	-1.07048e-15	0.253893	0.799769	0.997018	-6.59605
Subgroup	Control Female .vs. Fabry Non Treated Non Classic Male	Chemokine	CXCL8	-0.117169	-1.18093	0.946592	-1.07009e-17	-0.216845	0.828491	0.997018	-6.60465
Subgroup	Control Female .vs. Fabry Non Treated Non Classic Male	Proinflammatory	IL4	-0.120209	-1.26581	1.02539	4.74018e-17	-0.206578	0.836494	0.997018	-6.6068
Subgroup	Control Female .vs. Fabry Non Treated Non Classic Male	Chemokine	CCL3	-0.0615862	-1.14626	1.02309	-1.52535e-16	-0.11178	0.91108	0.997018	-6.62168
Subgroup	Control Female .vs. Fabry Non Treated Non Classic Male	Cytokine	IL17A	-0.0368031	-1.12542	1.05181	-8.10374e-17	-0.0665564	0.946984	0.997018	-6.62566
Subgroup	Control Female .vs. Fabry Non Treated Non Classic Male	Cytokine	IL5	-0.0346145	-1.08788	1.01866	-5.61382e-17	-0.0646991	0.948461	0.997018	-6.62578
Subgroup	Control Female .vs. Fabry Non Treated Non Classic Male	Chemokine	CXCL10	0.024288	-1.07781	1.12639	-2.7339e-16	0.0433861	0.965426	0.997018	-6.62691
Subgroup	Control Female .vs. Fabry Non Treated Non Classic Male	Cytokine	LTA	-0.0238678	-1.17421	1.12647	-4.4859e-17	-0.0408475	0.967447	0.997018	-6.62702
Subgroup	Control Female .vs. Fabry Non Treated Non Classic Male	Vascular_Injury	VCAM1	-0.0227071	-1.15978	1.11437	-2.33831e-16	-0.0393145	0.968668	0.997018	-6.62708
Subgroup	Control Female .vs. Fabry Non Treated Non Classic Male	Proinflammatory	IL2	0.0202833	-1.14066	1.18122	1.79185e-17	0.034396	0.972587	0.997018	-6.62726
Subgroup	Control Female .vs. Fabry Non Treated Non Classic Male	Proinflammatory	IL13	-0.0039854	-1.13276	1.12479	5.51698e-17	-0.00695097	0.994459	0.997018	-6.62782
Subgroup	Control Female .vs. Fabry Non Treated Non Classic Male	Chemokine	CCL22	-0.00203876	-1.07507	1.07099	2.74249e-16	-0.00374055	0.997018	0.997018	-6.62783
Subgroup	Control Female .vs. Fabry Treated Classic Female	Angiogenesis	FGF2	2.20645	1.7525	2.66041	-1.04703e-16	9.56892	6.85631e-19	2.81109e-17	32.1704
Subgroup	Control Female .vs. Fabry Treated Classic Female	Cytokine	IL7	2.10017	1.65168	2.54865	5.35605e-17	9.21908	8.43646e-18	1.72948e-16	29.6969
Subgroup	Control Female .vs. Fabry Treated Classic Female	Angiogenesis	VEGFC	2.01654	1.53662	2.49647	7.61746e-17	8.27204	5.88087e-15	8.03719e-14	23.2543
Subgroup	Control Female .vs. Fabry Treated Classic Female	Cytokine	VEGFA	1.75288	1.24689	2.25887	-3.01939e-16	6.82007	5.85512e-11	6.00149e-10	14.2295
Subgroup	Control Female .vs. Fabry Treated Classic Female	Angiogenesis	PGF	1.51971	0.942426	2.097	-4.4101e-16	5.18264	4.26403e-07	2.82684e-06	5.58809
Subgroup	Control Female .vs. Fabry Treated Classic Female	Angiogenesis	VEGFD	1.49334	0.923274	2.0634	-4.7955e-16	5.15722	4.82631e-07	2.82684e-06	5.46868
Subgroup	Control Female .vs. Fabry Treated Classic Female	Chemokine	CCL13	1.25046	0.701877	1.79904	2.176e-16	4.48754	1.06362e-05	5.45108e-05	2.50114
Subgroup	Control Female .vs. Fabry Treated Classic Female	Chemokine	CCL17	1.22876	0.667996	1.78952	-1.00753e-16	4.31389	2.24509e-05	0.000102276	1.78927
Subgroup	Control Female .vs. Fabry Treated Classic Female	Proinflammatory	CXCL8	1.23249	0.617883	1.8471	-8.03825e-17	3.94789	0.000100411	0.000411684	0.369763
Subgroup	Control Female .vs. Fabry Treated Classic Female	Chemokine	CCL4	1.06082	0.490639	1.63101	1.92519e-16	3.66276	0.0002997	0.00111706	-0.658206
Subgroup	Control Female .vs. Fabry Treated Classic Female	Cytokine	CSF2	0.872162	0.259506	1.48482	4.12432e-17	2.8026	0.00543295	0.0185626	-3.32888
Subgroup	Control Female .vs. Fabry Treated Classic Female	Cytokine	IL16	0.835517	0.229661	1.44137	-1.96658e-16	2.71498	0.00705102	0.0222378	-3.56356
Subgroup	Control Female .vs. Fabry Treated Classic Female	Proinflammatory	IL1B	0.797267	0.169357	1.42518	-5.53509e-17	2.49969	0.0130181	0.0381245	-4.11008
Subgroup	Control Female .vs. Fabry Treated Classic Female	Cytokine	IL1A	0.646029	0.112906	1.17915	-6.50974e-17	2.38564	0.0177324	0.0484686	-4.38216
Subgroup	Control Female .vs. Fabry Treated Classic Female	Chemokine	CCL11	0.718164	0.114457	1.32187	-1.9415e-16	2.34195	0.0199032	0.051002	-4.48315
Subgroup	Control Female .vs. Fabry Treated Classic Female	Chemokine	CCL2	0.627697	-0.0137311	1.26913	9.81477e-17	1.92656	0.055074	0.132825	-5.35328
Subgroup	Control Female .vs. Fabry Treated Classic Female	Chemokine	CCL26	0.558876	-0.0315322	1.14928	-1.51081e-16	1.86356	0.0634585	0.144544	-5.47088
Subgroup	Control Female .vs. Fabry Treated Classic Female	Vascular_Injury	SAA1	0.612976	-0.0446583	1.27061	-6.15722e-17	1.83501	0.0675931	0.145859	-5.52291
Subgroup	Control Female .vs. Fabry Treated Classic Female	Chemokine	CCL3	0.533225	-0.0795451	1.14599	-1.52535e-16	1.71314	0.0878234	0.180038	-5.73624
Subgroup	Control Female .vs. Fabry Treated Classic Female	Cytokine	IL12A	0.467569	-0.158119	1.09326	-4.08231e-16	1.47119	0.142394	0.278006	-6.11716
Subgroup	Control Female .vs. Fabry Treated Classic Female	Chemokine	CXCL8	-0.363009	-0.963963	0.237944	-1.07009e-17	-1.18921	0.235393	0.436459	-6.48908
Subgroup	Control Female .vs. Fabry Treated Classic Female	Angiogenesis	FLT1	-0.375967	-1.01104	0.259108	8.86632e-16	-1.16548	0.244843	0.436459	-6.51682
Subgroup	Control Female .vs. Fabry Treated Classic Female	Cytokine	LTA	0.355356	-0.29451	1.00522	-4.4859e-17	1.07652	0.282648	0.482857	-6.6159
Subgroup	Control Female .vs. Fabry Treated Classic Female	Angiogenesis	TEK	0.309709	-0.317763	0.93718	-1.07048e-15	0.971716	0.332053	0.544567	-6.72261
Subgroup	Control Female .vs. Fabry Treated Classic Female	Proinflammatory	IL2	-0.300435	-0.956289	0.355418	1.79185e-17	-0.901829	0.367944	0.580219	-6.78775
Subgroup	Control Female .vs. Fabry Treated Classic Female	Proinflammatory	IL13	-0.268464	-0.906145	0.369216	5.51698e-17	-0.828827	0.407928	0.619446	-6.85062
Subgroup	Control Female .vs. Fabry Treated Classic Female	Proinflammatory	IL4	0.248073	-0.399113	0.895258	4.74018e-17	0.754624	0.451126	0.660577	-6.90912
Subgroup	Control Female .vs. Fabry Treated Classic Female	Chemokine	CCL22	0.209838	-0.396352	0.816027	2.74249e-16	0.681484	0.496144	0.678598	-6.96144
Subgroup	Control Female .vs. Fabry Treated Classic Female	Cytokine	IL5	0.205786	-0.38924	0.800813	-5.61382e-17	0.680864	0.496535	0.678598	-6.96186
Subgroup	Control Female .vs. Fabry Treated Classic Female	Vascular_Injury	CRP	-0.193105	-0.850482	0.464272	4.17455e-16	-0.578308	0.563534	0.723573	-7.02622
Subgroup	Control Female .vs. Fabry Treated Classic Female	Proinflammatory	TNF	-0.176663	-0.779935	0.426608	-1.54599e-16	-0.576519	0.56474	0.723573	-7.02725
Subgroup	Control Female .vs. Fabry Treated Classic Female	Proinflammatory	IL6	0.139759	-0.507389	0.786907	6.72571e-17	0.425165	0.671052	0.807898	-7.10283
Subgroup	Control Female .vs. Fabry Treated Classic Female	Proinflammatory	IFNG	0.127397	-0.47612	0.730914	-5.48354e-17	0.415576	0.678047	0.807898	-7.10686
Subgroup	Control Female .vs. Fabry Treated Classic Female	Chemokine	CXCL10	0.125197	-0.497417	0.747811	-2.7339e-16	0.395873	0.692508	0.807898	-7.11483
Subgroup	Control Female .vs. Fabry Treated Classic Female	Vascular_Injury	VCAM1	0.114637	-0.527734	0.757009	-2.33831e-16	0.351334	0.725609	0.807898	-7.13143
Subgroup	Control Female .vs. Fabry Treated Classic Female	Cytokine	IL15	0.0959138	-0.535624	0.727451	1.55164e-16	0.298994	0.765172	0.807898	-7.14841
Subgroup	Control Female .vs. Fabry Treated Classic Female	Proinflammatory	IL10	-0.0848702	-0.688229	0.518489	1.23542e-16	-0.276923	0.782049	0.807898	-7.15475
Subgroup	Control Female .vs. Fabry Treated Classic Female	Vascular_Injury	ICAM1	0.0881497	-0.545789	0.722088	7.19539e-16	0.27375	0.784484	0.807898	-7.15562
Subgroup	Control Female .vs. Fabry Treated Classic Female	Cytokine	IL17A	0.0840074	-0.530987	0.699002	-8.10374e-17	0.268922	0.788193	0.807898	-7.15693
Subgroup	Control Female .vs. Fabry Treated Classic Female	Proinflammatory	IL12B	-0.0441429	-0.702995	0.614709	-7.01309e-17	-0.131903	0.895159	0.895159	-7.18433
Subgroup	Control Female .vs. Fabry Treated Classic Male	Angiogenesis	FGF2	2.24054	1.80197	2.6791	-1.04703e-16	10.0578	1.91021e-20	7.83186e-19	35.6858
Subgroup	Control Female .vs. Fabry Treated Classic Male	Cytokine	IL7	2.1094	1.67612	2.54267	5.35605e-17	9.58458	6.12112e-19	1.25483e-17	32.2648
Subgroup	Control Female .vs. Fabry Treated Classic Male	Cytokine	VEGFA	1.89788	1.40904	2.38671	-3.01939e-16	7.6434	3.62227e-13	3.71283e-12	19.1849
Subgroup	Control Female .vs. Fabry Treated Classic Male	Angiogenesis	VEGFC	1.7106	1.24695	2.17426	7.61746e-17	7.26335	3.96767e-12	3.25349e-11	16.838
Subgroup	Control Female .vs. Fabry Treated Classic Male	Chemokine	CCL13	1.39442	0.864441	1.9244	2.176e-16	5.17982	4.32301e-07	2.95406e-06	5.54548
Subgroup	Control Female .vs. Fabry Treated Classic Male	Chemokine	CCL17	1.40615	0.864407	1.9479	-1.00753e-16	5.10996	6.0684e-07	3.55435e-06	5.21851
Subgroup	Control Female .vs. Fabry Treated Classic Male	Angiogenesis	VEGFD	1.37817	0.827439	1.92891	-4.7955e-16	4.92655	1.45367e-06	7.45008e-06	4.37764
Subgroup	Control Female .vs. Fabry Treated Classic Male	Angiogenesis	PGF	1.32824	0.770532	1.88595	-4.4101e-16	4.68866	4.35093e-06	1.98209e-05	3.32548
Subgroup	Control Female .vs. Fabry Treated Classic Male	Proinflammatory	CXCL8	1.28298	0.689206	1.87675	-8.03825e-17	4.25384	2.89127e-05	0.000118542	1.51781
Subgroup	Control Female .vs. Fabry Treated Classic Male	Chemokine	CCL4	1.11041	0.559563	1.66126	1.92519e-16	3.96855	9.25295e-05	0.000344883	0.415506
Subgroup	Control Female .vs. Fabry Treated Classic Male	Cytokine	IL16	0.988575	0.403263	1.57389	-1.96658e-16	3.32508	0.00100514	0.00343425	-1.81722
Subgroup	Control Female .vs. Fabry Treated Classic Male	Proinflammatory	IL1B	0.887265	0.280646	1.49388	-5.53509e-17	2.8795	0.00429893	0.0135582	-3.14989
Subgroup	Control Female .vs. Fabry Treated Classic Male	Chemokine	CCL11	0.752642	0.169406	1.33588	-1.9415e-16	2.54053	0.0116235	0.0340402	-4.04284
Subgroup	Control Female .vs. Fabry Treated Classic Male	Cytokine	IL12A	0.714253	0.109781	1.31873	-4.08231e-16	2.32625	0.0207386	0.0566856	-4.55233
Subgroup	Control Female .vs. Fabry Treated Classic Male	Proinflammatory	IFNG	0.62537	0.0423176	1.20842	-5.48354e-17	2.11159	0.0356315	0.0913058	-5.01942
Subgroup	Control Female .vs. Fabry Treated Classic Male	Cytokine	IL5	0.597752	0.0229015	1.1726	-5.61382e-17	2.04714	0.0416034	0.100338	-5.15114
Subgroup	Control Female .vs. Fabry Treated Classic Male	Cytokine	CSF2	0.580092	-0.01179	1.17197	4.12432e-17	1.92949	0.0547079	0.124613	-5.38134
Subgroup	Control Female .vs. Fabry Treated Classic Male	Chemokine	CCL2	0.588294	-0.031385	1.20797	9.81477e-17	1.86899	0.0626958	0.135291	-5.49455
Subgroup	Control Female .vs. Fabry Treated Classic Male	Chemokine	CCL3	0.537425	-0.0545673	1.12942	-1.52535e-16	1.78724	0.07501	0.153771	-5.64197
Subgroup	Control Female .vs. Fabry Treated Classic Male	Proinflammatory	IL4	0.535227	-0.0900134	1.16047	4.74018e-17	1.68528	0.0930793	0.181726	-5.81678
Subgroup	Control Female .vs. Fabry Treated Classic Male	Vascular_Injury	ICAM1	0.476866	-0.135577	1.08931	7.19539e-16	1.53289	0.126462	0.23568	-6.05929
Subgroup	Control Female .vs. Fabry Treated Classic Male	Cytokine	LTA	0.474173	-0.153657	1.102	-4.4859e-17	1.48688	0.138203	0.246362	-6.12808
Subgroup	Control Female .vs. Fabry Treated Classic Male	Cytokine	IL17A	0.428763	-0.165378	1.0229	-8.10374e-17	1.42072	0.156541	0.250174	-6.22338
Subgroup	Control Female .vs. Fabry Treated Classic Male	Cytokine	IL15	0.438096	-0.172027	1.04822	1.55164e-16	1.41362	0.158615	0.250174	-6.23335
Subgroup	Control Female .vs. Fabry Treated Classic Male	Vascular_Injury	SAA1	0.456164	-0.179171	1.0915	-6.15722e-17	1.41351	0.158647	0.250174	-6.2335
Subgroup	Control Female .vs. Fabry Treated Classic Male	Chemokine	CXCL10	0.410847	-0.190656	1.01235	-2.7339e-16	1.34469	0.179842	0.273094	-6.3276
Subgroup	Control Female .vs. Fabry Treated Classic Male	Chemokine	CCL26	0.371979	-0.19841	0.942367	-1.51081e-16	1.28389	0.200271	0.293254	-6.40689
Subgroup	Control Female .vs. Fabry Treated Classic Male	Angiogenesis	TEK	0.366439	-0.239756	0.972634	-1.07048e-15	1.19006	0.235058	0.332323	-6.52212
Subgroup	Control Female .vs. Fabry Treated Classic Male	Proinflammatory	IL10	0.339805	-0.243095	0.922706	1.23542e-16	1.14767	0.252112	0.344553	-6.57135
Subgroup	Control Female .vs. Fabry Treated Classic Male	Vascular_Injury	CRP	0.248862	-0.386225	0.883948	4.17455e-16	0.771446	0.44111	0.583404	-6.93054
Subgroup	Control Female .vs. Fabry Treated Classic Male	Chemokine	CCL22	0.217173	-0.368462	0.802807	2.74249e-16	0.73006	0.46598	0.597037	-6.9615
Subgroup	Control Female .vs. Fabry Treated Classic Male	Proinflammatory	IL6	0.220837	-0.404368	0.846041	6.72571e-17	0.695391	0.487403	0.605561	-6.98613
Subgroup	Control Female .vs. Fabry Treated Classic Male	Cytokine	IL1A	0.144498	-0.370547	0.659543	-6.50974e-17	0.552327	0.581177	0.680829	-7.07511
Subgroup	Control Female .vs. Fabry Treated Classic Male	Angiogenesis	FLT1	-0.172123	-0.785664	0.441419	8.86632e-16	-0.552299	0.581196	0.680829	-7.07513
Subgroup	Control Female .vs. Fabry Treated Classic Male	Vascular_Injury	VCAM1	0.132405	-0.488185	0.752995	-2.33831e-16	0.420031	0.674794	0.768515	-7.13928
Subgroup	Control Female .vs. Fabry Treated Classic Male	Proinflammatory	IL13	0.108857	-0.507201	0.724915	5.51698e-17	0.347869	0.728207	0.788675	-7.16693
Subgroup	Control Female .vs. Fabry Treated Classic Male	Proinflammatory	IL2	-0.110776	-0.744391	0.522839	1.79185e-17	-0.344192	0.730967	0.788675	-7.1682
Subgroup	Control Female .vs. Fabry Treated Classic Male	Chemokine	CXCL8	0.0875648	-0.493011	0.668141	-1.07009e-17	0.296928	0.766748	0.803066	-7.18332
Subgroup	Control Female .vs. Fabry Treated Classic Male	Proinflammatory	TNF	0.0814287	-0.501387	0.664244	-1.54599e-16	0.275059	0.783479	0.803066	-7.18956
Subgroup	Control Female .vs. Fabry Treated Classic Male	Proinflammatory	IL12B	0.0578628	-0.578649	0.694374	-7.01309e-17	0.178967	0.858096	0.858096	-7.21134
Subgroup	Control Female .vs. Fabry Treated Non Classic Female	Angiogenesis	FGF2	2.23937	1.65331	2.82542	-1.04703e-16	7.52262	7.81533e-13	3.20428e-11	18.6042
Subgroup	Control Female .vs. Fabry Treated Non Classic Female	Cytokine	IL7	2.1267	1.54771	2.70569	5.35605e-17	7.2313	4.83779e-12	9.91748e-11	16.8261
Subgroup	Control Female .vs. Fabry Treated Non Classic Female	Cytokine	VEGFA	2.02172	1.36848	2.67495	-3.01939e-16	6.09302	3.76342e-09	5.14334e-08	10.3559
Subgroup	Control Female .vs. Fabry Treated Non Classic Female	Angiogenesis	VEGFC	1.46526	0.845682	2.08485	7.61746e-17	4.65583	5.04494e-06	4.13685e-05	3.42784
Subgroup	Control Female .vs. Fabry Treated Non Classic Female	Chemokine	CCL13	1.41502	0.706809	2.12324	2.176e-16	3.9335	0.000106273	0.000726199	0.5414
Subgroup	Control Female .vs. Fabry Treated Non Classic Female	Angiogenesis	VEGFD	1.27343	0.537477	2.00937	-4.7955e-16	3.40649	0.000757236	0.00443524	-1.29018
Subgroup	Control Female .vs. Fabry Treated Non Classic Female	Chemokine	CCL17	1.22167	0.497732	1.94561	-1.00753e-16	3.32226	0.00101497	0.00520173	-1.56064
Subgroup	Control Female .vs. Fabry Treated Non Classic Female	Chemokine	CCL4	1.10323	0.367131	1.83934	1.92519e-16	2.95059	0.00344723	0.0157041	-2.67898
Subgroup	Control Female .vs. Fabry Treated Non Classic Female	Angiogenesis	PGF	1.08217	0.336898	1.82744	-4.4101e-16	2.85865	0.00458292	0.01879	-2.9365
Subgroup	Control Female .vs. Fabry Treated Non Classic Female	Proinflammatory	CXCL8	1.075	0.281542	1.86846	-8.03825e-17	2.66726	0.00810474	0.0302086	-3.44789
Subgroup	Control Female .vs. Fabry Treated Non Classic Female	Cytokine	IL12A	1.03039	0.222629	1.83815	-4.08231e-16	2.5113	0.0126073	0.0430749	-3.83972
Subgroup	Control Female .vs. Fabry Treated Non Classic Female	Cytokine	CSF2	0.903656	0.11272	1.69459	4.12432e-17	2.24927	0.0252933	0.0797712	-4.44718
Subgroup	Control Female .vs. Fabry Treated Non Classic Female	Cytokine	IL16	0.87753	0.0953735	1.65969	-1.96658e-16	2.20876	0.0280232	0.082068	-4.53535
Subgroup	Control Female .vs. Fabry Treated Non Classic Female	Cytokine	IL1A	0.721209	0.0329507	1.40947	-6.50974e-17	2.06296	0.0400637	0.106129	-4.83989
Subgroup	Control Female .vs. Fabry Treated Non Classic Female	Proinflammatory	IL1B	0.843704	0.0330756	1.65433	-5.53509e-17	2.04903	0.0414162	0.106129	-4.86792
Subgroup	Control Female .vs. Fabry Treated Non Classic Female	Chemokine	CCL11	0.660685	-0.118697	1.44007	-1.9415e-16	1.66888	0.0962898	0.232228	-5.56171
Subgroup	Control Female .vs. Fabry Treated Non Classic Female	Angiogenesis	FLT1	-0.612012	-1.43189	0.207867	8.86632e-16	-1.46957	0.142831	0.325337	-5.8699
Subgroup	Control Female .vs. Fabry Treated Non Classic Female	Cytokine	LTA	0.601673	-0.2373	1.44065	-4.4859e-17	1.41186	0.15913	0.343386	-5.95195
Subgroup	Control Female .vs. Fabry Treated Non Classic Female	Chemokine	CCL2	0.577706	-0.250375	1.40579	9.81477e-17	1.37345	0.170739	0.350016	-6.00477
Subgroup	Control Female .vs. Fabry Treated Non Classic Female	Chemokine	CCL3	0.524903	-0.266179	1.31599	-1.52535e-16	1.30628	0.192557	0.375944	-6.09367
Subgroup	Control Female .vs. Fabry Treated Non Classic Female	Vascular_Injury	CRP	-0.521829	-1.3705	0.326841	4.17455e-16	-1.21051	0.22713	0.401284	-6.21282
Subgroup	Control Female .vs. Fabry Treated Non Classic Female	Chemokine	CXCL8	-0.469564	-1.24539	0.306264	-1.07009e-17	-1.19154	0.234477	0.401284	-6.23536
Subgroup	Control Female .vs. Fabry Treated Non Classic Female	Vascular_Injury	SAA1	0.513388	-0.335614	1.36239	-6.15722e-17	1.19047	0.234898	0.401284	-6.23663
Subgroup	Control Female .vs. Fabry Treated Non Classic Female	Proinflammatory	IL13	0.420055	-0.403187	1.2433	5.51698e-17	1.00452	0.316018	0.51827	-6.43866
Subgroup	Control Female .vs. Fabry Treated Non Classic Female	Cytokine	IL5	0.368401	-0.399776	1.13658	-5.61382e-17	0.944148	0.34593	0.526807	-6.49695
Subgroup	Control Female .vs. Fabry Treated Non Classic Female	Vascular_Injury	ICAM1	-0.391685	-1.2101	0.426727	7.19539e-16	-0.942205	0.346922	0.526807	-6.49877
Subgroup	Control Female .vs. Fabry Treated Non Classic Female	Angiogenesis	TEK	0.356931	-0.453132	1.16699	-1.07048e-15	0.867452	0.386457	0.565883	-6.56582
Subgroup	Control Female .vs. Fabry Treated Non Classic Female	Proinflammatory	IL10	0.289312	-0.489621	1.06825	1.23542e-16	0.731218	0.465274	0.657801	-6.67386
Subgroup	Control Female .vs. Fabry Treated Non Classic Female	Cytokine	IL17A	0.283687	-0.510268	1.07764	-8.10374e-17	0.703435	0.482385	0.65926	-6.69364
Subgroup	Control Female .vs. Fabry Treated Non Classic Female	Proinflammatory	IL4	0.257888	-0.577625	1.0934	4.74018e-17	0.607656	0.543922	0.71938	-6.75598
Subgroup	Control Female .vs. Fabry Treated Non Classic Female	Cytokine	IL15	0.196048	-0.619263	1.01136	1.55164e-16	0.47339	0.636314	0.800922	-6.82807
Subgroup	Control Female .vs. Fabry Treated Non Classic Female	Chemokine	CXCL10	0.170356	-0.633435	0.974147	-2.7339e-16	0.417248	0.676826	0.800922	-6.85291
Subgroup	Control Female .vs. Fabry Treated Non Classic Female	Proinflammatory	IFNG	0.162226	-0.616911	0.941363	-5.48354e-17	0.409908	0.682196	0.800922	-6.85593
Subgroup	Control Female .vs. Fabry Treated Non Classic Female	Proinflammatory	TNF	-0.16134	-0.940161	0.61748	-1.54599e-16	-0.407837	0.683714	0.800922	-6.85677
Subgroup	Control Female .vs. Fabry Treated Non Classic Female	Proinflammatory	IL12B	-0.139428	-0.990002	0.711147	-7.01309e-17	-0.322713	0.74716	0.840894	-6.88767
Subgroup	Control Female .vs. Fabry Treated Non Classic Female	Chemokine	CCL22	0.112554	-0.670033	0.895141	2.74249e-16	0.283146	0.77728	0.840894	-6.89959
Subgroup	Control Female .vs. Fabry Treated Non Classic Female	Proinflammatory	IL2	-0.120605	-0.967308	0.726098	1.79185e-17	-0.280424	0.779365	0.840894	-6.90035
Subgroup	Control Female .vs. Fabry Treated Non Classic Female	Chemokine	CCL26	0.0929784	-0.669236	0.855193	-1.51081e-16	0.240151	0.810393	0.851952	-6.91077
Subgroup	Control Female .vs. Fabry Treated Non Classic Female	Proinflammatory	IL6	-0.034572	-0.870037	0.800893	6.72571e-17	-0.0814661	0.935131	0.95298	-6.93615
Subgroup	Control Female .vs. Fabry Treated Non Classic Female	Vascular_Injury	VCAM1	-0.0248613	-0.854159	0.804437	-2.33831e-16	-0.0590191	0.95298	0.95298	-6.93771
Subgroup	Control Female .vs. Fabry Treated Non Classic Male	Angiogenesis	FGF2	2.22114	1.83657	2.6057	-1.04703e-16	11.3707	8.87589e-25	3.63911e-23	45.4879
Subgroup	Control Female .vs. Fabry Treated Non Classic Male	Cytokine	IL7	2.06501	1.68508	2.44494	5.35605e-17	10.7004	1.53561e-22	3.148e-21	40.3864
Subgroup	Control Female .vs. Fabry Treated Non Classic Male	Angiogenesis	VEGFC	1.99662	1.59006	2.40319	7.61746e-17	9.66821	3.33557e-19	4.55861e-18	32.7886
Subgroup	Control Female .vs. Fabry Treated Non Classic Male	Cytokine	VEGFA	1.91189	1.48324	2.34053	-3.01939e-16	8.78099	1.82797e-16	1.87367e-15	26.5633
Subgroup	Control Female .vs. Fabry Treated Non Classic Male	Chemokine	CCL13	1.34063	0.875903	1.80535	2.176e-16	5.67927	3.4629e-08	2.36632e-07	7.87558
Subgroup	Control Female .vs. Fabry Treated Non Classic Male	Chemokine	CCL17	1.35943	0.884389	1.83447	-1.00753e-16	5.63385	4.38769e-08	2.56993e-07	7.64582
Subgroup	Control Female .vs. Fabry Treated Non Classic Male	Angiogenesis	PGF	1.22654	0.737495	1.71558	-4.4101e-16	4.93759	1.38014e-06	7.07324e-06	4.31131
Subgroup	Control Female .vs. Fabry Treated Non Classic Male	Angiogenesis	VEGFD	1.1864	0.703476	1.66932	-4.7955e-16	4.83652	2.21204e-06	1.00771e-05	3.85746
Subgroup	Control Female .vs. Fabry Treated Non Classic Male	Chemokine	CCL4	0.988799	0.505774	1.47182	1.92519e-16	4.03012	7.23753e-05	0.000296739	0.526603
Subgroup	Control Female .vs. Fabry Treated Non Classic Male	Cytokine	IL16	1.02515	0.511901	1.53839	-1.96658e-16	3.93225	0.000106797	0.000398062	0.15857
Subgroup	Control Female .vs. Fabry Treated Non Classic Male	Proinflammatory	CXCL8	1.01384	0.49318	1.5345	-8.03825e-17	3.8335	0.000156929	0.000536174	-0.204582
Subgroup	Control Female .vs. Fabry Treated Non Classic Male	Proinflammatory	IL1B	0.838196	0.306268	1.37012	-5.53509e-17	3.10222	0.00212241	0.00669377	-2.6311
Subgroup	Control Female .vs. Fabry Treated Non Classic Male	Cytokine	IL12A	0.816999	0.286953	1.34704	-4.08231e-16	3.03451	0.00264194	0.0077371	-2.83184
Subgroup	Control Female .vs. Fabry Treated Non Classic Male	Cytokine	CSF2	0.791816	0.27281	1.31082	4.12432e-17	3.00353	0.00291657	0.00797195	-2.92229
Subgroup	Control Female .vs. Fabry Treated Non Classic Male	Chemokine	CCL3	0.732751	0.213648	1.25185	-1.52535e-16	2.77897	0.00583233	0.0149454	-3.55193
Subgroup	Control Female .vs. Fabry Treated Non Classic Male	Chemokine	CCL11	0.665418	0.153993	1.17684	-1.9415e-16	2.56149	0.0109607	0.0264346	-4.11757
Subgroup	Control Female .vs. Fabry Treated Non Classic Male	Cytokine	IL17A	0.641447	0.12046	1.16243	-8.10374e-17	2.4239	0.0160058	0.0364577	-4.45277
Subgroup	Control Female .vs. Fabry Treated Non Classic Male	Chemokine	CCL2	0.595258	0.0518779	1.13864	9.81477e-17	2.15666	0.0319064	0.0688507	-5.05298
Subgroup	Control Female .vs. Fabry Treated Non Classic Male	Cytokine	LTA	0.51168	-0.0388471	1.06221	-4.4859e-17	1.82979	0.068374	0.140167	-5.69485
Subgroup	Control Female .vs. Fabry Treated Non Classic Male	Cytokine	IL1A	0.387531	-0.0640985	0.839161	-6.50974e-17	1.68929	0.0923069	0.180218	-5.93918
Subgroup	Control Female .vs. Fabry Treated Non Classic Male	Cytokine	IL5	0.388459	-0.115612	0.89253	-5.61382e-17	1.51717	0.130383	0.240362	-6.21245
Subgroup	Control Female .vs. Fabry Treated Non Classic Male	Chemokine	CCL26	0.381018	-0.119141	0.881177	-1.51081e-16	1.49975	0.134837	0.240362	-6.2385
Subgroup	Control Female .vs. Fabry Treated Non Classic Male	Angiogenesis	FLT1	-0.391706	-0.929704	0.146292	8.86632e-16	-1.43338	0.152896	0.261198	-6.33504
Subgroup	Control Female .vs. Fabry Treated Non Classic Male	Proinflammatory	IL2	-0.370855	-0.926455	0.184746	1.79185e-17	-1.31408	0.189924	0.311475	-6.49774
Subgroup	Control Female .vs. Fabry Treated Non Classic Male	Proinflammatory	IL4	0.337559	-0.210698	0.885817	4.74018e-17	1.21212	0.226515	0.357197	-6.62572
Subgroup	Control Female .vs. Fabry Treated Non Classic Male	Vascular_Injury	SAA1	0.270539	-0.286569	0.827648	-6.15722e-17	0.956029	0.339905	0.516152	-6.90204
Subgroup	Control Female .vs. Fabry Treated Non Classic Male	Chemokine	CXCL10	0.232917	-0.294524	0.760358	-2.7339e-16	0.869375	0.385407	0.53023	-6.98086
Subgroup	Control Female .vs. Fabry Treated Non Classic Male	Proinflammatory	IL12B	-0.245689	-0.803829	0.312451	-7.01309e-17	-0.866608	0.386919	0.53023	-6.98326
Subgroup	Control Female .vs. Fabry Treated Non Classic Male	Angiogenesis	TEK	0.233467	-0.298089	0.765024	-1.07048e-15	0.864683	0.387973	0.53023	-6.98492
Subgroup	Control Female .vs. Fabry Treated Non Classic Male	Proinflammatory	IL13	0.16507	-0.375135	0.705275	5.51698e-17	0.601575	0.547957	0.724717	-7.17736
Subgroup	Control Female .vs. Fabry Treated Non Classic Male	Chemokine	CCL22	0.146117	-0.367411	0.659644	2.74249e-16	0.560167	0.575826	0.737777	-7.20137
Subgroup	Control Female .vs. Fabry Treated Non Classic Male	Proinflammatory	TNF	-0.115148	-0.626204	0.395908	-1.54599e-16	-0.443576	0.657701	0.817144	-7.25981
Subgroup	Control Female .vs. Fabry Treated Non Classic Male	Vascular_Injury	VCAM1	0.104219	-0.43996	0.648398	-2.33831e-16	0.377038	0.706439	0.851882	-7.28709
Subgroup	Control Female .vs. Fabry Treated Non Classic Male	Cytokine	IL15	0.0646622	-0.470339	0.599663	1.55164e-16	0.237945	0.812103	0.95132	-7.32983
Subgroup	Control Female .vs. Fabry Treated Non Classic Male	Vascular_Injury	ICAM1	0.0564605	-0.480575	0.593496	7.19539e-16	0.206977	0.836182	0.952319	-7.33671
Subgroup	Control Female .vs. Fabry Treated Non Classic Male	Proinflammatory	IL10	0.0385837	-0.472546	0.549714	1.23542e-16	0.148612	0.88197	0.964712	-7.34708
Subgroup	Control Female .vs. Fabry Treated Non Classic Male	Proinflammatory	IL6	-0.0359748	-0.5842	0.512251	6.72571e-17	-0.129187	0.897305	0.964712	-7.34978
Subgroup	Control Female .vs. Fabry Treated Non Classic Male	Vascular_Injury	CRP	0.0257691	-0.531122	0.58266	4.17455e-16	0.0910982	0.927481	0.964712	-7.35397
Subgroup	Control Female .vs. Fabry Treated Non Classic Male	Chemokine	CXCL8	-0.0190975	-0.528189	0.489994	-1.07009e-17	-0.0738517	0.941183	0.964712	-7.3554
Subgroup	Control Female .vs. Fabry Treated Non Classic Male	Proinflammatory	IFNG	0.0065772	-0.504686	0.517841	-5.48354e-17	0.0253266	0.979813	0.979813	-7.3578
Subgroup	Control Male .vs. Fabry Non Treated Classic Female	Angiogenesis	FGF2	1.6893	1.19131	2.18729	-1.04703e-16	6.67831	1.35214e-10	5.54377e-09	13.6138
Subgroup	Control Male .vs. Fabry Non Treated Classic Female	Cytokine	IL7	1.42018	0.928195	1.91217	5.35605e-17	5.6829	3.39792e-08	6.96574e-07	8.26451
Subgroup	Control Male .vs. Fabry Non Treated Classic Female	Cytokine	VEGFA	1.33528	0.780204	1.89036	-3.01939e-16	4.73588	3.51181e-06	4.79948e-05	3.81483
Subgroup	Control Male .vs. Fabry Non Treated Classic Female	Chemokine	CCL17	1.03125	0.416097	1.64641	-1.00753e-16	3.30035	0.00109427	0.00897303	-1.58258
Subgroup	Control Male .vs. Fabry Non Treated Classic Female	Cytokine	IL16	1.0573	0.392674	1.72193	-1.96658e-16	3.13185	0.0019262	0.0131624	-2.10102
Subgroup	Control Male .vs. Fabry Non Treated Classic Female	Angiogenesis	VEGFC	0.822759	0.296278	1.34924	7.61746e-17	3.07659	0.00230684	0.0135115	-2.26555
Subgroup	Control Male .vs. Fabry Non Treated Classic Female	Chemokine	CCL26	0.910384	0.262704	1.55807	-1.51081e-16	2.76722	0.00604062	0.0309582	-3.13592
Subgroup	Control Male .vs. Fabry Non Treated Classic Female	Cytokine	IL1A	0.797989	0.213152	1.38283	-6.50974e-17	2.68622	0.00767006	0.0349414	-3.34944
Subgroup	Control Male .vs. Fabry Non Treated Classic Female	Proinflammatory	IL4	0.89994	0.189975	1.60991	4.74018e-17	2.4955	0.0131697	0.0539956	-3.8284
Subgroup	Control Male .vs. Fabry Non Treated Classic Female	Chemokine	CCL13	0.715526	0.11373	1.31732	2.176e-16	2.34076	0.0199656	0.0730231	-4.19221
Subgroup	Control Male .vs. Fabry Non Treated Classic Female	Proinflammatory	IL13	0.82248	0.122942	1.52202	5.51698e-17	2.3147	0.0213726	0.0730231	-4.25129
Subgroup	Control Male .vs. Fabry Non Treated Classic Female	Angiogenesis	PGF	0.666354	0.0330698	1.29964	-4.4101e-16	2.07151	0.0392519	0.123794	-4.7718
Subgroup	Control Male .vs. Fabry Non Treated Classic Female	Proinflammatory	IL12B	0.623214	-0.0995498	1.34598	-7.01309e-17	1.69754	0.0907349	0.265724	-5.46271
Subgroup	Control Male .vs. Fabry Non Treated Classic Female	Chemokine	CCL4	0.518083	-0.107411	1.14358	1.92519e-16	1.63063	0.104122	0.273834	-5.5722
Subgroup	Control Male .vs. Fabry Non Treated Classic Female	Proinflammatory	IL1B	0.562651	-0.126169	1.25147	-5.53509e-17	1.6081	0.10897	0.273834	-5.6081
Subgroup	Control Male .vs. Fabry Non Treated Classic Female	Cytokine	IL12A	0.553505	-0.132878	1.23989	-4.08231e-16	1.58758	0.113541	0.273834	-5.64037
Subgroup	Control Male .vs. Fabry Non Treated Classic Female	Proinflammatory	CXCL8	0.475487	-0.198744	1.14972	-8.03825e-17	1.38839	0.166153	0.378459	-5.9324
Subgroup	Control Male .vs. Fabry Non Treated Classic Female	Angiogenesis	VEGFD	0.363075	-0.262287	0.988437	-4.7955e-16	1.143	0.254043	0.516435	-6.2391
Subgroup	Control Male .vs. Fabry Non Treated Classic Female	Cytokine	LTA	0.411051	-0.301855	1.12396	-4.4859e-17	1.13513	0.25732	0.516435	-6.24797
Subgroup	Control Male .vs. Fabry Non Treated Classic Female	Cytokine	IL17A	0.383154	-0.291498	1.05781	-8.10374e-17	1.11808	0.264516	0.516435	-6.26695
Subgroup	Control Male .vs. Fabry Non Treated Classic Female	Chemokine	CCL3	0.360854	-0.311358	1.03306	-1.52535e-16	1.05683	0.291524	0.526007	-6.33283
Subgroup	Control Male .vs. Fabry Non Treated Classic Female	Chemokine	CCL11	0.350547	-0.311722	1.01282	-1.9415e-16	1.04206	0.298308	0.526007	-6.34817
Subgroup	Control Male .vs. Fabry Non Treated Classic Female	Cytokine	IL5	-0.338702	-0.991449	0.314045	-5.61382e-17	-1.02154	0.307906	0.526007	-6.36912
Subgroup	Control Male .vs. Fabry Non Treated Classic Female	Vascular_Injury	CRP	-0.338988	-1.06013	0.382158	4.17455e-16	-0.925426	0.355563	0.583123	-6.46174
Subgroup	Control Male .vs. Fabry Non Treated Classic Female	Chemokine	CCL2	0.290685	-0.412965	0.994335	9.81477e-17	0.813292	0.416761	0.613545	-6.55831
Subgroup	Control Male .vs. Fabry Non Treated Classic Female	Chemokine	CXCL10	0.277462	-0.405548	0.960472	-2.7339e-16	0.799754	0.42455	0.613545	-6.56913
Subgroup	Control Male .vs. Fabry Non Treated Classic Female	Cytokine	CSF2	0.270082	-0.402005	0.942168	4.12432e-17	0.791134	0.429554	0.613545	-6.57593
Subgroup	Control Male .vs. Fabry Non Treated Classic Female	Chemokine	CCL22	0.258281	-0.406712	0.923273	2.74249e-16	0.764638	0.445149	0.613545	-6.59636
Subgroup	Control Male .vs. Fabry Non Treated Classic Female	Proinflammatory	TNF	0.254902	-0.40689	0.916694	-1.54599e-16	0.758285	0.448936	0.613545	-6.60115
Subgroup	Control Male .vs. Fabry Non Treated Classic Female	Proinflammatory	IL2	0.241033	-0.478441	0.960507	1.79185e-17	0.659541	0.510105	0.674655	-6.67056
Subgroup	Control Male .vs. Fabry Non Treated Classic Female	Proinflammatory	IFNG	0.194869	-0.467192	0.856929	-5.48354e-17	0.579461	0.562756	0.721032	-6.71977
Subgroup	Control Male .vs. Fabry Non Treated Classic Female	Vascular_Injury	SAA1	-0.175542	-0.896969	0.545886	-6.15722e-17	-0.479036	0.632297	0.777173	-6.77252
Subgroup	Control Male .vs. Fabry Non Treated Classic Female	Proinflammatory	IL10	0.152023	-0.509865	0.813911	1.23542e-16	0.452174	0.651503	0.777173	-6.78493
Subgroup	Control Male .vs. Fabry Non Treated Classic Female	Chemokine	CXCL8	-0.139802	-0.79905	0.519447	-1.07009e-17	-0.417488	0.67665	0.777173	-6.7999
Subgroup	Control Male .vs. Fabry Non Treated Classic Female	Angiogenesis	TEK	0.143225	-0.545114	0.831564	-1.07048e-15	0.409634	0.682396	0.777173	-6.80313
Subgroup	Control Male .vs. Fabry Non Treated Classic Female	Proinflammatory	IL6	-0.104562	-0.814486	0.605363	6.72571e-17	-0.289962	0.772066	0.855532	-6.84469
Subgroup	Control Male .vs. Fabry Non Treated Classic Female	Angiogenesis	FLT1	-0.0650642	-0.761745	0.631616	8.86632e-16	-0.183861	0.854259	0.891745	-6.86966
Subgroup	Control Male .vs. Fabry Non Treated Classic Female	Vascular_Injury	ICAM1	-0.0638405	-0.759274	0.631593	7.19539e-16	-0.180726	0.856717	0.891745	-6.87023
Subgroup	Control Male .vs. Fabry Non Treated Classic Female	Vascular_Injury	VCAM1	0.0586378	-0.646047	0.763322	-2.33831e-16	0.163819	0.869995	0.891745	-6.87312
Subgroup	Control Male .vs. Fabry Non Treated Classic Female	Cytokine	IL15	0.0457496	-0.64705	0.738549	1.55164e-16	0.130005	0.896658	0.896658	-6.87805
Subgroup	Control Male .vs. Fabry Non Treated Classic Male	Cytokine	IL7	1.59467	0.630103	2.55924	5.35605e-17	3.25476	0.00127814	0.0491817	-1.12466
Subgroup	Control Male .vs. Fabry Non Treated Classic Male	Chemokine	CCL26	1.95914	0.689333	3.22895	-1.51081e-16	3.03744	0.00261721	0.0491817	-1.74962
Subgroup	Control Male .vs. Fabry Non Treated Classic Male	Cytokine	VEGFA	1.62343	0.535172	2.71168	-3.01939e-16	2.93686	0.00359866	0.0491817	-2.02527
Subgroup	Control Male .vs. Fabry Non Treated Classic Male	Angiogenesis	FGF2	1.33368	0.357352	2.31002	-1.04703e-16	2.68928	0.00760207	0.0779212	-2.66664
Subgroup	Control Male .vs. Fabry Non Treated Classic Male	Cytokine	IL16	1.24668	-0.0563506	2.54971	-1.96658e-16	1.88357	0.060688	0.414702	-4.3795
Subgroup	Control Male .vs. Fabry Non Treated Classic Male	Chemokine	CCL17	1.05966	-0.146386	2.2657	-1.00753e-16	1.72975	0.0848071	0.496728	-4.63997
Subgroup	Control Male .vs. Fabry Non Treated Classic Male	Angiogenesis	PGF	1.04938	-0.192206	2.29096	-4.4101e-16	1.66393	0.0972746	0.498532	-4.74481
Subgroup	Control Male .vs. Fabry Non Treated Classic Male	Angiogenesis	VEGFC	0.831276	-0.200916	1.86347	7.61746e-17	1.5855	0.114013	0.519393	-4.86454
Subgroup	Control Male .vs. Fabry Non Treated Classic Male	Proinflammatory	IL4	1.07191	-0.32001	2.46383	4.74018e-17	1.51609	0.130655	0.533335	-4.96577
Subgroup	Control Male .vs. Fabry Non Treated Classic Male	Cytokine	IL1A	0.855344	-0.291259	2.00195	-6.50974e-17	1.46862	0.14309	0.533335	-5.03244
Subgroup	Control Male .vs. Fabry Non Treated Classic Male	Proinflammatory	IL13	0.952489	-0.41899	2.32397	5.51698e-17	1.36726	0.17267	0.55951	-5.1678
Subgroup	Control Male .vs. Fabry Non Treated Classic Male	Chemokine	CCL13	0.805709	-0.37414	1.98556	2.176e-16	1.34441	0.179933	0.55951	-5.19699
Subgroup	Control Male .vs. Fabry Non Treated Classic Male	Chemokine	CCL4	0.805156	-0.421155	2.03147	1.92519e-16	1.29259	0.197249	0.55951	-5.26142
Subgroup	Control Male .vs. Fabry Non Treated Classic Male	Cytokine	IL17A	0.832254	-0.490434	2.15494	-8.10374e-17	1.23874	0.216509	0.55951	-5.32571
Subgroup	Control Male .vs. Fabry Non Treated Classic Male	Proinflammatory	IL6	-0.872267	-2.26411	0.519575	6.72571e-17	-1.23379	0.218345	0.55951	-5.33149
Subgroup	Control Male .vs. Fabry Non Treated Classic Male	Cytokine	LTA	0.741574	-0.656112	2.13926	-4.4859e-17	1.04454	0.297161	0.692992	-5.53508
Subgroup	Control Male .vs. Fabry Non Treated Classic Male	Proinflammatory	IL12B	0.740875	-0.676138	2.15789	-7.01309e-17	1.02932	0.30424	0.692992	-5.55
Subgroup	Control Male .vs. Fabry Non Treated Classic Male	Cytokine	CSF2	0.651366	-0.666293	1.96902	4.12432e-17	0.973201	0.331316	0.714946	-5.60313
Subgroup	Control Male .vs. Fabry Non Treated Classic Male	Cytokine	IL12A	0.600662	-0.745025	1.94635	-4.08231e-16	0.878752	0.38031	0.725263	-5.68587
Subgroup	Control Male .vs. Fabry Non Treated Classic Male	Cytokine	IL15	0.597765	-0.760501	1.95603	1.55164e-16	0.866415	0.387024	0.725263	-5.69605
Subgroup	Control Male .vs. Fabry Non Treated Classic Male	Angiogenesis	TEK	0.574952	-0.77457	1.92447	-1.07048e-15	0.838748	0.402345	0.725263	-5.71838
Subgroup	Control Male .vs. Fabry Non Treated Classic Male	Chemokine	CCL3	0.543849	-0.774053	1.86175	-1.52535e-16	0.812411	0.417265	0.725263	-5.73896
Subgroup	Control Male .vs. Fabry Non Treated Classic Male	Proinflammatory	TNF	0.510458	-0.787016	1.80793	-1.54599e-16	0.774537	0.439285	0.725263	-5.76742
Subgroup	Control Male .vs. Fabry Non Treated Classic Male	Chemokine	CCL22	0.506498	-0.797252	1.81025	2.74249e-16	0.764828	0.445035	0.725263	-5.7745
Subgroup	Control Male .vs. Fabry Non Treated Classic Male	Proinflammatory	IFNG	-0.48013	-1.77813	0.817872	-5.48354e-17	-0.728221	0.467103	0.725263	-5.80038
Subgroup	Control Male .vs. Fabry Non Treated Classic Male	Cytokine	IL5	0.44891	-0.830832	1.72865	-5.61382e-17	0.690585	0.490414	0.725263	-5.82567
Subgroup	Control Male .vs. Fabry Non Treated Classic Male	Chemokine	CCL11	0.450336	-0.848075	1.74875	-1.9415e-16	0.682818	0.495302	0.725263	-5.83073
Subgroup	Control Male .vs. Fabry Non Treated Classic Male	Proinflammatory	CXCL8	0.397239	-0.924622	1.7191	-8.03825e-17	0.591625	0.554592	0.784079	-5.8858
Subgroup	Control Male .vs. Fabry Non Treated Classic Male	Proinflammatory	IL1B	0.338751	-1.01171	1.68922	-5.53509e-17	0.493831	0.621823	0.809666	-5.93612
Subgroup	Control Male .vs. Fabry Non Treated Classic Male	Vascular_Injury	ICAM1	-0.315907	-1.67934	1.04752	7.19539e-16	-0.456148	0.648646	0.809666	-5.95309
Subgroup	Control Male .vs. Fabry Non Treated Classic Male	Vascular_Injury	SAA1	0.324286	-1.09011	1.73868	-6.15722e-17	0.451376	0.652077	0.809666	-5.95514
Subgroup	Control Male .vs. Fabry Non Treated Classic Male	Vascular_Injury	CRP	-0.305106	-1.71895	1.10873	4.17455e-16	-0.424845	0.671284	0.809666	-5.96617
Subgroup	Control Male .vs. Fabry Non Treated Classic Male	Chemokine	CXCL10	0.285655	-1.05342	1.62473	-2.7339e-16	0.419969	0.674839	0.809666	-5.96812
Subgroup	Control Male .vs. Fabry Non Treated Classic Male	Proinflammatory	IL10	-0.259584	-1.55725	1.03808	1.23542e-16	-0.393818	0.694023	0.809666	-5.97822
Subgroup	Control Male .vs. Fabry Non Treated Classic Male	Chemokine	CXCL8	0.243567	-1.04892	1.53606	-1.07009e-17	0.370999	0.710926	0.809666	-5.98649
Subgroup	Control Male .vs. Fabry Non Treated Classic Male	Proinflammatory	IL2	0.204024	-1.20654	1.61459	1.79185e-17	0.284753	0.776049	0.859946	-6.01332
Subgroup	Control Male .vs. Fabry Non Treated Classic Male	Angiogenesis	FLT1	-0.129652	-1.49553	1.23622	8.86632e-16	-0.186874	0.851898	0.906313	-6.03523
Subgroup	Control Male .vs. Fabry Non Treated Classic Male	Vascular_Injury	VCAM1	0.122011	-1.25956	1.50358	-2.33831e-16	0.173863	0.862102	0.906313	-6.03745
Subgroup	Control Male .vs. Fabry Non Treated Classic Male	Chemokine	CCL2	-0.0766401	-1.45618	1.3029	9.81477e-17	-0.109371	0.912989	0.935813	-6.04612
Subgroup	Control Male .vs. Fabry Non Treated Classic Male	Angiogenesis	VEGFD	0.0323061	-1.19375	1.25836	-4.7955e-16	0.0518748	0.958666	0.958666	-6.05052
Subgroup	Control Male .vs. Fabry Non Treated Non Classic Female	Angiogenesis	FGF2	1.59441	1.09642	2.0924	-1.04703e-16	6.30318	1.16821e-09	4.78966e-08	11.5551
Subgroup	Control Male .vs. Fabry Non Treated Non Classic Female	Cytokine	IL7	1.37245	0.880461	1.86444	5.35605e-17	5.49189	9.11119e-08	1.86779e-06	7.35324
Subgroup	Control Male .vs. Fabry Non Treated Non Classic Female	Cytokine	VEGFA	1.39717	0.842094	1.95225	-3.01939e-16	4.95538	1.26917e-06	1.3009e-05	4.82915
Subgroup	Control Male .vs. Fabry Non Treated Non Classic Female	Angiogenesis	VEGFC	1.12425	0.597769	1.65073	7.61746e-17	4.20398	3.5594e-05	0.000291871	1.66306
Subgroup	Control Male .vs. Fabry Non Treated Non Classic Female	Angiogenesis	PGF	1.02304	0.389756	1.65633	-4.4101e-16	3.18035	0.00164084	0.00910134	-1.90294
Subgroup	Control Male .vs. Fabry Non Treated Non Classic Female	Chemokine	CCL17	0.993109	0.377953	1.60826	-1.00753e-16	3.17828	0.00165217	0.00910134	-1.90923
Subgroup	Control Male .vs. Fabry Non Treated Non Classic Female	Cytokine	IL5	-1.04658	-1.69932	-0.393829	-5.61382e-17	-3.1565	0.00177587	0.00910134	-1.97521
Subgroup	Control Male .vs. Fabry Non Treated Non Classic Female	Cytokine	IL16	0.932266	0.26764	1.59689	-1.96658e-16	2.76148	0.00614481	0.027993	-3.09823
Subgroup	Control Male .vs. Fabry Non Treated Non Classic Female	Cytokine	IL12A	0.877401	0.191018	1.56378	-4.08231e-16	2.51659	0.0124241	0.0474188	-3.72326
Subgroup	Control Male .vs. Fabry Non Treated Non Classic Female	Chemokine	CCL3	0.856362	0.18415	1.52857	-1.52535e-16	2.50802	0.0127221	0.0474188	-3.74411
Subgroup	Control Male .vs. Fabry Non Treated Non Classic Female	Cytokine	IL1A	0.72488	0.140042	1.30972	-6.50974e-17	2.44012	0.0153197	0.0523423	-3.90709
Subgroup	Control Male .vs. Fabry Non Treated Non Classic Female	Chemokine	CCL13	0.695405	0.0936099	1.2972	2.176e-16	2.27494	0.0236864	0.0747032	-4.28564
Subgroup	Control Male .vs. Fabry Non Treated Non Classic Female	Proinflammatory	IL13	0.751538	0.051999	1.45108	5.51698e-17	2.11504	0.0353335	0.103477	-4.62772
Subgroup	Control Male .vs. Fabry Non Treated Non Classic Female	Proinflammatory	TNF	0.696212	0.0344199	1.358	-1.54599e-16	2.0711	0.0392906	0.107394	-4.71752
Subgroup	Control Male .vs. Fabry Non Treated Non Classic Female	Proinflammatory	CXCL8	0.681767	0.00753687	1.356	-8.03825e-17	1.99071	0.0475109	0.121747	-4.87705
Subgroup	Control Male .vs. Fabry Non Treated Non Classic Female	Chemokine	CXCL8	0.642775	-0.0164732	1.30202	-1.07009e-17	1.91951	0.0559635	0.134971	-5.01323
Subgroup	Control Male .vs. Fabry Non Treated Non Classic Female	Cytokine	IL17A	0.582868	-0.0917838	1.25752	-8.10374e-17	1.70087	0.0901078	0.205246	-5.40117
Subgroup	Control Male .vs. Fabry Non Treated Non Classic Female	Proinflammatory	IFNG	0.534163	-0.127897	1.19622	-5.48354e-17	1.58839	0.113358	0.237862	-5.58288
Subgroup	Control Male .vs. Fabry Non Treated Non Classic Female	Chemokine	CCL4	0.500939	-0.124555	1.12643	1.92519e-16	1.57667	0.11603	0.237862	-5.60111
Subgroup	Control Male .vs. Fabry Non Treated Non Classic Female	Proinflammatory	IL1B	0.534744	-0.154076	1.22356	-5.53509e-17	1.52834	0.127587	0.24345	-5.67489
Subgroup	Control Male .vs. Fabry Non Treated Non Classic Female	Proinflammatory	IL4	0.546775	-0.163191	1.25674	4.74018e-17	1.51618	0.130632	0.24345	-5.6931
Subgroup	Control Male .vs. Fabry Non Treated Non Classic Female	Chemokine	CCL11	0.458473	-0.203796	1.12074	-1.9415e-16	1.36289	0.174043	0.310251	-5.91037
Subgroup	Control Male .vs. Fabry Non Treated Non Classic Female	Vascular_Injury	CRP	-0.41172	-1.13287	0.309426	4.17455e-16	-1.12398	0.262009	0.447599	-6.2034
Subgroup	Control Male .vs. Fabry Non Treated Non Classic Female	Cytokine	IL15	-0.370112	-1.06291	0.322687	1.55164e-16	-1.05173	0.293853	0.481918	-6.28103
Subgroup	Control Male .vs. Fabry Non Treated Non Classic Female	Cytokine	CSF2	-0.304601	-0.976687	0.367486	4.12432e-17	-0.892248	0.373047	0.588266	-6.43429
Subgroup	Control Male .vs. Fabry Non Treated Non Classic Female	Chemokine	CXCL10	0.283725	-0.399285	0.966735	-2.7339e-16	0.817807	0.414181	0.628942	-6.49727
Subgroup	Control Male .vs. Fabry Non Treated Non Classic Female	Angiogenesis	FLT1	-0.212934	-0.909615	0.483746	8.86632e-16	-0.601717	0.547863	0.792998	-6.64915
Subgroup	Control Male .vs. Fabry Non Treated Non Classic Female	Proinflammatory	IL12B	0.213748	-0.509016	0.936511	-7.01309e-17	0.582218	0.560901	0.792998	-6.66059
Subgroup	Control Male .vs. Fabry Non Treated Non Classic Female	Vascular_Injury	ICAM1	-0.192341	-0.887775	0.503092	7.19539e-16	-0.5445	0.586543	0.801305	-6.68164
Subgroup	Control Male .vs. Fabry Non Treated Non Classic Female	Proinflammatory	IL6	-0.184962	-0.894887	0.524962	6.72571e-17	-0.512922	0.608422	0.801305	-6.69819
Subgroup	Control Male .vs. Fabry Non Treated Non Classic Female	Proinflammatory	IL10	0.164322	-0.497566	0.826209	1.23542e-16	0.488754	0.625409	0.801305	-6.71019
Subgroup	Control Male .vs. Fabry Non Treated Non Classic Female	Chemokine	CCL26	0.140835	-0.506846	0.788516	-1.51081e-16	0.428085	0.668927	0.831091	-6.73776
Subgroup	Control Male .vs. Fabry Non Treated Non Classic Female	Angiogenesis	TEK	0.126065	-0.562274	0.814404	-1.07048e-15	0.360555	0.718711	0.846673	-6.76416
Subgroup	Control Male .vs. Fabry Non Treated Non Classic Female	Proinflammatory	IL2	0.117366	-0.602109	0.83684	1.79185e-17	0.321149	0.748344	0.846673	-6.77749
Subgroup	Control Male .vs. Fabry Non Treated Non Classic Female	Angiogenesis	VEGFD	0.0996569	-0.525705	0.725019	-4.7955e-16	0.31373	0.753966	0.846673	-6.77982
Subgroup	Control Male .vs. Fabry Non Treated Non Classic Female	Chemokine	CCL2	0.0981207	-0.605529	0.801771	9.81477e-17	0.274526	0.783888	0.846673	-6.79126
Subgroup	Control Male .vs. Fabry Non Treated Non Classic Female	Vascular_Injury	SAA1	-0.0953248	-0.816752	0.626103	-6.15722e-17	-0.260132	0.794958	0.846673	-6.79507
Subgroup	Control Male .vs. Fabry Non Treated Non Classic Female	Cytokine	LTA	0.0798497	-0.633056	0.792755	-4.4859e-17	0.220507	0.825642	0.846673	-6.80452
Subgroup	Control Male .vs. Fabry Non Treated Non Classic Female	Vascular_Injury	VCAM1	0.0787536	-0.625931	0.783438	-2.33831e-16	0.220017	0.826023	0.846673	-6.80463
Subgroup	Control Male .vs. Fabry Non Treated Non Classic Female	Chemokine	CCL22	0.0350555	-0.629937	0.700048	2.74249e-16	0.103782	0.917419	0.917419	-6.8233
Subgroup	Control Male .vs. Fabry Non Treated Non Classic Male	Angiogenesis	FGF2	1.50854	0.7017	2.31537	-1.04703e-16	3.68087	0.000280131	0.0114854	0.130044
Subgroup	Control Male .vs. Fabry Non Treated Non Classic Male	Proinflammatory	IFNG	-1.84388	-2.91654	-0.77122	-5.48354e-17	-3.38416	0.000818842	0.0132897	-0.838585
Subgroup	Control Male .vs. Fabry Non Treated Non Classic Male	Cytokine	IL7	1.35018	0.553072	2.1473	5.35605e-17	3.33468	0.000972417	0.0132897	-0.992886
Subgroup	Control Male .vs. Fabry Non Treated Non Classic Male	Cytokine	IL1A	1.4018	0.454257	2.34935	-6.50974e-17	2.91251	0.00388211	0.0397917	-2.22361
Subgroup	Control Male .vs. Fabry Non Treated Non Classic Male	Angiogenesis	VEGFC	1.07286	0.219866	1.92586	7.61746e-17	2.47615	0.0138881	0.113883	-3.33101
Subgroup	Control Male .vs. Fabry Non Treated Non Classic Male	Chemokine	CCL17	1.11849	0.12182	2.11515	-1.00753e-16	2.20933	0.0279829	0.191217	-3.92374
Subgroup	Control Male .vs. Fabry Non Treated Non Classic Male	Cytokine	VEGFA	0.961484	0.0621588	1.86081	-3.01939e-16	2.10477	0.0362262	0.212182	-4.13828
Subgroup	Control Male .vs. Fabry Non Treated Non Classic Male	Chemokine	CCL13	0.895308	-0.0797122	1.87033	2.176e-16	1.80775	0.0717469	0.326847	-4.69267
Subgroup	Control Male .vs. Fabry Non Treated Non Classic Male	Cytokine	IL16	0.807432	-0.269387	1.88425	-1.96658e-16	1.47619	0.141046	0.548686	-5.21431
Subgroup	Control Male .vs. Fabry Non Treated Non Classic Male	Chemokine	CCL26	0.774799	-0.274564	1.82416	-1.51081e-16	1.4536	0.147208	0.548686	-5.24609
Subgroup	Control Male .vs. Fabry Non Treated Non Classic Male	Chemokine	CCL4	0.675778	-0.337638	1.68919	1.92519e-16	1.31279	0.190356	0.643587	-5.43327
Subgroup	Control Male .vs. Fabry Non Treated Non Classic Male	Angiogenesis	PGF	0.659482	-0.366556	1.68552	-4.4101e-16	1.26538	0.206817	0.643587	-5.49207
Subgroup	Control Male .vs. Fabry Non Treated Non Classic Male	Chemokine	CXCL8	0.620834	-0.447271	1.68894	-1.07009e-17	1.14431	0.253501	0.643587	-5.63251
Subgroup	Control Male .vs. Fabry Non Treated Non Classic Male	Proinflammatory	IL1B	0.64689	-0.469126	1.76291	-5.53509e-17	1.14114	0.254812	0.643587	-5.63599
Subgroup	Control Male .vs. Fabry Non Treated Non Classic Male	Vascular_Injury	ICAM1	-0.647982	-1.77471	0.47875	7.19539e-16	-1.1322	0.258546	0.643587	-5.64578
Subgroup	Control Male .vs. Fabry Non Treated Non Classic Male	Proinflammatory	CXCL8	0.61736	-0.475018	1.70974	-8.03825e-17	1.11262	0.266853	0.643587	-5.66696
Subgroup	Control Male .vs. Fabry Non Treated Non Classic Male	Proinflammatory	IL13	0.528449	-0.604933	1.66183	5.51698e-17	0.917924	0.35947	0.818793	-5.85756
Subgroup	Control Male .vs. Fabry Non Treated Non Classic Male	Cytokine	IL15	-0.493628	-1.61609	0.628836	1.55164e-16	-0.86578	0.387372	0.821869	-5.90245
Subgroup	Control Male .vs. Fabry Non Treated Non Classic Male	Cytokine	IL5	-0.448317	-1.50589	0.609254	-5.61382e-17	-0.834557	0.404698	0.821869	-5.92807
Subgroup	Control Male .vs. Fabry Non Treated Non Classic Male	Cytokine	IL12A	0.435338	-0.67673	1.54741	-4.08231e-16	0.770682	0.441563	0.821869	-5.97758
Subgroup	Control Male .vs. Fabry Non Treated Non Classic Male	Angiogenesis	VEGFD	0.387736	-0.625466	1.40094	-4.7955e-16	0.75339	0.451866	0.821869	-5.99031
Subgroup	Control Male .vs. Fabry Non Treated Non Classic Male	Proinflammatory	IL2	0.420612	-0.745069	1.58629	1.79185e-17	0.710367	0.478084	0.821869	-6.02073
Subgroup	Control Male .vs. Fabry Non Treated Non Classic Male	Chemokine	CCL11	0.384524	-0.688475	1.45752	-1.9415e-16	0.705512	0.481094	0.821869	-6.02405
Subgroup	Control Male .vs. Fabry Non Treated Non Classic Male	Chemokine	CCL2	0.335422	-0.804621	1.47547	9.81477e-17	0.57923	0.562912	0.923176	-6.10246
Subgroup	Control Male .vs. Fabry Non Treated Non Classic Male	Angiogenesis	FLT1	-0.235467	-1.36422	0.893284	8.86632e-16	-0.410689	0.681623	0.956127	-6.18314
Subgroup	Control Male .vs. Fabry Non Treated Non Classic Male	Proinflammatory	IL10	-0.222569	-1.29495	0.849812	1.23542e-16	-0.408597	0.683156	0.956127	-6.18397
Subgroup	Control Male .vs. Fabry Non Treated Non Classic Male	Vascular_Injury	SAA1	-0.237133	-1.40598	0.931713	-6.15722e-17	-0.399407	0.689906	0.956127	-6.18756
Subgroup	Control Male .vs. Fabry Non Treated Non Classic Male	Vascular_Injury	CRP	-0.220826	-1.38922	0.947563	4.17455e-16	-0.372086	0.710118	0.956127	-6.19776
Subgroup	Control Male .vs. Fabry Non Treated Non Classic Male	Proinflammatory	IL4	0.21609	-0.934186	1.36637	4.74018e-17	0.369839	0.711789	0.956127	-6.19856
Subgroup	Control Male .vs. Fabry Non Treated Non Classic Male	Cytokine	CSF2	-0.193539	-1.28244	0.895366	4.12432e-17	-0.349912	0.726675	0.956127	-6.2055
Subgroup	Control Male .vs. Fabry Non Treated Non Classic Male	Chemokine	CCL22	0.144786	-0.932625	1.2222	2.74249e-16	0.26456	0.791548	0.956127	-6.23088
Subgroup	Control Male .vs. Fabry Non Treated Non Classic Male	Angiogenesis	TEK	0.116749	-0.998488	1.23199	-1.07048e-15	0.206095	0.836871	0.956127	-6.2442
Subgroup	Control Male .vs. Fabry Non Treated Non Classic Male	Vascular_Injury	VCAM1	-0.114655	-1.25637	1.02706	-2.33831e-16	-0.197703	0.843425	0.956127	-6.24584
Subgroup	Control Male .vs. Fabry Non Treated Non Classic Male	Cytokine	LTA	-0.11364	-1.26868	1.0414	-4.4859e-17	-0.193694	0.84656	0.956127	-6.2466
Subgroup	Control Male .vs. Fabry Non Treated Non Classic Male	Proinflammatory	TNF	0.0995272	-0.972698	1.17175	-1.54599e-16	0.182741	0.855137	0.956127	-6.24859
Subgroup	Control Male .vs. Fabry Non Treated Non Classic Male	Proinflammatory	IL6	0.101025	-1.04918	1.25123	6.72571e-17	0.172915	0.862846	0.956127	-6.25028
Subgroup	Control Male .vs. Fabry Non Treated Non Classic Male	Chemokine	CXCL10	0.0621223	-1.04448	1.16873	-2.7339e-16	0.110519	0.912079	0.975093	-6.25884
Subgroup	Control Male .vs. Fabry Non Treated Non Classic Male	Proinflammatory	IL12B	0.0482935	-1.12272	1.2193	-7.01309e-17	0.0811911	0.93535	0.975093	-6.26156
Subgroup	Control Male .vs. Fabry Non Treated Non Classic Male	Cytokine	IL17A	-0.0213735	-1.11443	1.07169	-8.10374e-17	-0.0384956	0.969321	0.975093	-6.26404
Subgroup	Control Male .vs. Fabry Non Treated Non Classic Male	Chemokine	CCL3	0.0172875	-1.07182	1.10639	-1.52535e-16	0.0312495	0.975093	0.975093	-6.26428
Subgroup	Control Male .vs. Fabry Treated Classic Female	Cytokine	IL7	1.5842	1.13	2.0384	5.35605e-17	6.86667	4.43531e-11	1.81848e-09	14.6819
Subgroup	Control Male .vs. Fabry Treated Classic Female	Angiogenesis	FGF2	1.54459	1.08485	2.00433	-1.04703e-16	6.6143	1.96542e-10	4.02911e-09	13.235
Subgroup	Control Male .vs. Fabry Treated Classic Female	Angiogenesis	VEGFC	1.42909	0.943048	1.91513	7.61746e-17	5.78851	1.94871e-08	2.66323e-07	8.7823
Subgroup	Control Male .vs. Fabry Treated Classic Female	Cytokine	VEGFA	1.29601	0.783571	1.80845	-3.01939e-16	4.97905	1.13485e-06	1.16322e-05	4.87285
Subgroup	Control Male .vs. Fabry Treated Classic Female	Angiogenesis	PGF	1.24463	0.659992	1.82927	-4.4101e-16	4.19115	3.75379e-05	0.000278221	1.54321
Subgroup	Control Male .vs. Fabry Treated Classic Female	Cytokine	IL16	1.06919	0.455618	1.68277	-1.96658e-16	3.43059	0.000695593	0.00407419	-1.18925
Subgroup	Control Male .vs. Fabry Treated Classic Female	Cytokine	IL1A	0.902616	0.362702	1.44253	-6.50974e-17	3.29123	0.00112895	0.00578585	-1.63608
Subgroup	Control Male .vs. Fabry Treated Classic Female	Chemokine	CCL17	0.919551	0.351648	1.48745	-1.00753e-16	3.18773	0.00160099	0.00729342	-1.95688
Subgroup	Control Male .vs. Fabry Treated Classic Female	Chemokine	CCL13	0.867818	0.312249	1.42339	2.176e-16	3.07518	0.00231741	0.00950136	-2.29491
Subgroup	Control Male .vs. Fabry Treated Classic Female	Chemokine	CCL26	0.917846	0.319916	1.51578	-1.51081e-16	3.02204	0.00274951	0.0102482	-2.45058
Subgroup	Control Male .vs. Fabry Treated Classic Female	Proinflammatory	CXCL8	0.796498	0.174058	1.41894	-8.03825e-17	2.51923	0.0123334	0.0421391	-3.79668
Subgroup	Control Male .vs. Fabry Treated Classic Female	Chemokine	CCL4	0.661007	0.0835597	1.23845	1.92519e-16	2.25359	0.0250169	0.0788994	-4.41373
Subgroup	Control Male .vs. Fabry Treated Classic Female	Angiogenesis	VEGFD	0.634793	0.0574679	1.21212	-4.7955e-16	2.16467	0.0312807	0.0916079	-4.6055
Subgroup	Control Male .vs. Fabry Treated Classic Female	Cytokine	IL12A	0.669261	0.0356017	1.30292	-4.08231e-16	2.07931	0.0385232	0.105297	-4.78257
Subgroup	Control Male .vs. Fabry Treated Classic Female	Chemokine	CCL3	0.612098	-0.00847775	1.23267	-1.52535e-16	1.94181	0.0531903	0.1363	-5.05331
Subgroup	Control Male .vs. Fabry Treated Classic Female	Chemokine	CCL11	0.570399	-0.0409989	1.1818	-1.9415e-16	1.83669	0.0673448	0.160852	-5.24813
Subgroup	Control Male .vs. Fabry Treated Classic Female	Vascular_Injury	CRP	-0.613784	-1.27954	0.0519675	4.17455e-16	-1.81503	0.0706181	0.160852	-5.28696
Subgroup	Control Male .vs. Fabry Treated Classic Female	Proinflammatory	IL4	0.584372	-0.0710586	1.2398	4.74018e-17	1.75527	0.0803369	0.173359	-5.39176
Subgroup	Control Male .vs. Fabry Treated Classic Female	Proinflammatory	IL1B	0.468675	-0.167234	1.10458	-5.53509e-17	1.45096	0.147939	0.303275	-5.87203
Subgroup	Control Male .vs. Fabry Treated Classic Female	Chemokine	CCL2	0.427033	-0.222567	1.07663	9.81477e-17	1.29418	0.196698	0.384029	-6.08444
Subgroup	Control Male .vs. Fabry Treated Classic Female	Chemokine	CXCL8	0.374994	-0.233615	0.983603	-1.07009e-17	1.21301	0.226174	0.421506	-6.18499
Subgroup	Control Male .vs. Fabry Treated Classic Female	Chemokine	CCL22	0.356662	-0.257249	0.970574	2.74249e-16	1.14375	0.25373	0.452302	-6.2657
Subgroup	Control Male .vs. Fabry Treated Classic Female	Proinflammatory	TNF	0.318508	-0.292449	0.929465	-1.54599e-16	1.02634	0.305642	0.522139	-6.39178
Subgroup	Control Male .vs. Fabry Treated Classic Female	Cytokine	CSF2	0.29967	-0.320791	0.920131	4.12432e-17	0.950844	0.342526	0.561742	-6.46569
Subgroup	Control Male .vs. Fabry Treated Classic Female	Proinflammatory	IL6	-0.296685	-0.952077	0.358708	6.72571e-17	-0.891197	0.373609	0.563601	-6.52013
Subgroup	Control Male .vs. Fabry Treated Classic Female	Angiogenesis	TEK	0.283216	-0.352249	0.918681	-1.07048e-15	0.877419	0.381032	0.563601	-6.5322
Subgroup	Control Male .vs. Fabry Treated Classic Female	Vascular_Injury	ICAM1	-0.283816	-0.925831	0.358198	7.19539e-16	-0.870308	0.384898	0.563601	-6.53836
Subgroup	Control Male .vs. Fabry Treated Classic Female	Proinflammatory	IL13	0.26397	-0.381835	0.909774	5.51698e-17	0.804699	0.421695	0.567169	-6.59283
Subgroup	Control Male .vs. Fabry Treated Classic Female	Cytokine	LTA	0.265584	-0.392561	0.923728	-4.4859e-17	0.794439	0.427631	0.567169	-6.60097
Subgroup	Control Male .vs. Fabry Treated Classic Female	Proinflammatory	IFNG	-0.245999	-0.857204	0.365206	-5.48354e-17	-0.792368	0.428835	0.567169	-6.6026
Subgroup	Control Male .vs. Fabry Treated Classic Female	Proinflammatory	IL12B	0.236897	-0.430348	0.904143	-7.01309e-17	0.698964	0.48517	0.618169	-6.67168
Subgroup	Control Male .vs. Fabry Treated Classic Female	Cytokine	IL5	-0.207916	-0.810523	0.394691	-5.61382e-17	-0.679258	0.497551	0.618169	-6.68516
Subgroup	Control Male .vs. Fabry Treated Classic Female	Chemokine	CXCL10	0.163031	-0.467514	0.793577	-2.7339e-16	0.50902	0.61115	0.736975	-6.78556
Subgroup	Control Male .vs. Fabry Treated Classic Female	Angiogenesis	FLT1	-0.146053	-0.789218	0.497113	8.86632e-16	-0.447061	0.655186	0.767504	-6.81497
Subgroup	Control Male .vs. Fabry Treated Classic Female	Cytokine	IL15	0.120902	-0.518681	0.760485	1.55164e-16	0.37215	0.71007	0.806745	-6.84545
Subgroup	Control Male .vs. Fabry Treated Classic Female	Proinflammatory	IL10	-0.0997458	-0.710792	0.5113	1.23542e-16	-0.321367	0.748178	0.806745	-6.86295
Subgroup	Control Male .vs. Fabry Treated Classic Female	Cytokine	IL17A	0.099437	-0.523393	0.722267	-8.10374e-17	0.314311	0.753525	0.806745	-6.86518
Subgroup	Control Male .vs. Fabry Treated Classic Female	Proinflammatory	IL2	0.099894	-0.564315	0.764103	1.79185e-17	0.296084	0.767391	0.806745	-6.8707
Subgroup	Control Male .vs. Fabry Treated Classic Female	Vascular_Injury	SAA1	0.0902245	-0.575787	0.756236	-6.15722e-17	0.2667	0.789902	0.809649	-6.87892
Subgroup	Control Male .vs. Fabry Treated Classic Female	Vascular_Injury	VCAM1	0.0226895	-0.627865	0.673244	-2.33831e-16	0.0686628	0.945308	0.945308	-6.91192
Subgroup	Control Male .vs. Fabry Treated Classic Male	Cytokine	IL7	1.59343	1.15424	2.03262	5.35605e-17	7.14271	8.34502e-12	3.42146e-10	16.2871
Subgroup	Control Male .vs. Fabry Treated Classic Male	Angiogenesis	FGF2	1.57867	1.13413	2.02322	-1.04703e-16	6.99129	2.09769e-11	4.30026e-10	15.3889
Subgroup	Control Male .vs. Fabry Treated Classic Male	Cytokine	VEGFA	1.44101	0.945503	1.93651	-3.01939e-16	5.72531	2.72041e-08	3.7179e-07	8.43287
Subgroup	Control Male .vs. Fabry Treated Classic Male	Angiogenesis	VEGFC	1.12315	0.653172	1.59313	7.61746e-17	4.70479	4.04468e-06	3.31664e-05	3.62722
Subgroup	Control Male .vs. Fabry Treated Classic Male	Cytokine	IL16	1.22225	0.628952	1.81555	-1.96658e-16	4.05572	6.52928e-05	0.000446167	0.987689
Subgroup	Control Male .vs. Fabry Treated Classic Male	Chemokine	CCL17	1.09695	0.547811	1.64608	-1.00753e-16	3.93265	0.000106627	0.000624532	0.526044
Subgroup	Control Male .vs. Fabry Treated Classic Male	Chemokine	CCL13	1.01178	0.47457	1.54899	2.176e-16	3.70785	0.000253201	0.00129766	-0.28437
Subgroup	Control Male .vs. Fabry Treated Classic Male	Angiogenesis	PGF	1.05316	0.487844	1.61848	-4.4101e-16	3.6676	0.000294348	0.00134092	-0.424945
Subgroup	Control Male .vs. Fabry Treated Classic Male	Cytokine	IL12A	0.915945	0.303226	1.52866	-4.08231e-16	2.94299	0.00353035	0.0144744	-2.71368
Subgroup	Control Male .vs. Fabry Treated Classic Male	Proinflammatory	CXCL8	0.846981	0.245111	1.44885	-8.03825e-17	2.77045	0.00598265	0.0209763	-3.18955
Subgroup	Control Male .vs. Fabry Treated Classic Male	Chemokine	CXCL8	0.825568	0.237071	1.41407	-1.07009e-17	2.76178	0.00613941	0.0209763	-3.21276
Subgroup	Control Male .vs. Fabry Treated Classic Male	Proinflammatory	IL4	0.871526	0.237755	1.5053	4.74018e-17	2.70725	0.00721281	0.0227481	-3.35708
Subgroup	Control Male .vs. Fabry Treated Classic Male	Chemokine	CCL4	0.710597	0.152232	1.26896	1.92519e-16	2.50545	0.012813	0.0366544	-3.86741
Subgroup	Control Male .vs. Fabry Treated Classic Male	Chemokine	CCL26	0.730948	0.152777	1.30912	-1.51081e-16	2.48892	0.0134101	0.0366544	-3.90754
Subgroup	Control Male .vs. Fabry Treated Classic Male	Chemokine	CCL3	0.616298	0.0162297	1.21637	-1.52535e-16	2.02195	0.0441581	0.102416	-4.93561
Subgroup	Control Male .vs. Fabry Treated Classic Male	Proinflammatory	IL13	0.641291	0.0168282	1.26575	5.51698e-17	2.02176	0.0441782	0.102416	-4.93599
Subgroup	Control Male .vs. Fabry Treated Classic Male	Chemokine	CCL11	0.604877	0.0136833	1.19607	-1.9415e-16	2.01427	0.0449632	0.102416	-4.9508
Subgroup	Control Male .vs. Fabry Treated Classic Male	Proinflammatory	TNF	0.5766	-0.0141673	1.16737	-1.54599e-16	1.92149	0.0557122	0.120221	-5.12984
Subgroup	Control Male .vs. Fabry Treated Classic Male	Angiogenesis	VEGFD	0.519629	-0.0386185	1.07788	-4.7955e-16	1.83251	0.0679658	0.13933	-5.29383
Subgroup	Control Male .vs. Fabry Treated Classic Male	Proinflammatory	IL1B	0.558672	-0.0562227	1.17357	-5.53509e-17	1.7887	0.074774	0.145987	-5.37179
Subgroup	Control Male .vs. Fabry Treated Classic Male	Cytokine	IL1A	0.401085	-0.120987	0.923157	-6.50974e-17	1.51247	0.131573	0.24363	-5.82075
Subgroup	Control Male .vs. Fabry Treated Classic Male	Cytokine	IL15	0.463084	-0.155363	1.08153	1.55164e-16	1.47414	0.141599	0.24363	-5.87723
Subgroup	Control Male .vs. Fabry Treated Classic Male	Cytokine	IL17A	0.444193	-0.158055	1.04644	-8.10374e-17	1.45203	0.147642	0.24363	-5.90914
Subgroup	Control Male .vs. Fabry Treated Classic Male	Chemokine	CXCL10	0.448681	-0.161028	1.05839	-2.7339e-16	1.44876	0.148555	0.24363	-5.91383
Subgroup	Control Male .vs. Fabry Treated Classic Male	Chemokine	CCL2	0.387629	-0.240504	1.01576	9.81477e-17	1.21491	0.225451	0.344714	-6.22158
Subgroup	Control Male .vs. Fabry Treated Classic Male	Chemokine	CCL22	0.363997	-0.229627	0.957621	2.74249e-16	1.20716	0.228415	0.344714	-6.23087
Subgroup	Control Male .vs. Fabry Treated Classic Male	Cytokine	LTA	0.3844	-0.251995	1.0208	-4.4859e-17	1.18915	0.235415	0.344714	-6.25222
Subgroup	Control Male .vs. Fabry Treated Classic Male	Angiogenesis	TEK	0.339946	-0.274519	0.954412	-1.07048e-15	1.08916	0.277043	0.382555	-6.36498
Subgroup	Control Male .vs. Fabry Treated Classic Male	Proinflammatory	IL10	0.32493	-0.265923	0.915783	1.23542e-16	1.08266	0.279918	0.382555	-6.37198
Subgroup	Control Male .vs. Fabry Treated Classic Male	Proinflammatory	IL12B	0.338903	-0.306293	0.984099	-7.01309e-17	1.0341	0.302004	0.399424	-6.42288
Subgroup	Control Male .vs. Fabry Treated Classic Male	Proinflammatory	IL2	0.289553	-0.352706	0.931812	1.79185e-17	0.887561	0.375559	0.481185	-6.56245
Subgroup	Control Male .vs. Fabry Treated Classic Male	Proinflammatory	IFNG	0.251974	-0.339033	0.842981	-5.48354e-17	0.83935	0.402008	0.499465	-6.60375
Subgroup	Control Male .vs. Fabry Treated Classic Male	Proinflammatory	IL6	-0.215607	-0.849342	0.418127	6.72571e-17	-0.669787	0.503561	0.607235	-6.73074
Subgroup	Control Male .vs. Fabry Treated Classic Male	Cytokine	IL5	0.184049	-0.398644	0.766743	-5.61382e-17	0.621834	0.534571	0.626211	-6.7615
Subgroup	Control Male .vs. Fabry Treated Classic Male	Vascular_Injury	CRP	-0.171817	-0.815568	0.471934	4.17455e-16	-0.525448	0.599699	0.682991	-6.81643
Subgroup	Control Male .vs. Fabry Treated Classic Male	Vascular_Injury	ICAM1	0.1049	-0.515899	0.725699	7.19539e-16	0.332664	0.739644	0.819605	-6.89865
Subgroup	Control Male .vs. Fabry Treated Classic Male	Vascular_Injury	SAA1	-0.0665873	-0.71059	0.577416	-6.15722e-17	-0.203556	0.838852	0.898822	-6.93307
Subgroup	Control Male .vs. Fabry Treated Classic Male	Angiogenesis	FLT1	0.0577923	-0.564119	0.679704	8.86632e-16	0.182946	0.854977	0.898822	-6.93703
Subgroup	Control Male .vs. Fabry Treated Classic Male	Vascular_Injury	VCAM1	0.0404574	-0.588599	0.669514	-2.33831e-16	0.126616	0.899338	0.921821	-6.9457
Subgroup	Control Male .vs. Fabry Treated Classic Male	Cytokine	CSF2	0.00760024	-0.592357	0.607558	4.12432e-17	0.0249395	0.980121	0.980121	-6.95337
Subgroup	Control Male .vs. Fabry Treated Non Classic Female	Cytokine	IL7	1.61074	1.02731	2.19417	5.35605e-17	5.43525	1.21481e-07	4.98073e-06	7.16639
Subgroup	Control Male .vs. Fabry Treated Non Classic Female	Angiogenesis	FGF2	1.5775	0.98696	2.16805	-1.04703e-16	5.25895	2.9319e-07	6.0104e-06	6.32466
Subgroup	Control Male .vs. Fabry Treated Non Classic Female	Cytokine	VEGFA	1.56485	0.906607	2.22308	-3.01939e-16	4.68024	4.51958e-06	6.17676e-05	3.72311
Subgroup	Control Male .vs. Fabry Treated Non Classic Female	Cytokine	IL12A	1.23208	0.418131	2.04603	-4.08231e-16	2.98004	0.00314207	0.025765	-2.36372
Subgroup	Control Male .vs. Fabry Treated Non Classic Female	Chemokine	CCL13	1.03238	0.318743	1.74603	2.176e-16	2.84801	0.00473431	0.0274542	-2.73223
Subgroup	Control Male .vs. Fabry Treated Non Classic Female	Cytokine	IL16	1.11121	0.323055	1.89936	-1.96658e-16	2.77566	0.00589041	0.0274542	-2.92752
Subgroup	Control Male .vs. Fabry Treated Non Classic Female	Cytokine	IL1A	0.977796	0.284264	1.67133	-6.50974e-17	2.77563	0.00589082	0.0274542	-2.92759
Subgroup	Control Male .vs. Fabry Treated Non Classic Female	Angiogenesis	VEGFC	0.877811	0.25348	1.50214	7.61746e-17	2.768	0.00602654	0.0274542	-2.9479
Subgroup	Control Male .vs. Fabry Treated Non Classic Female	Chemokine	CCL17	0.912465	0.18298	1.64195	-1.00753e-16	2.46252	0.014415	0.0591016	-3.71768
Subgroup	Control Male .vs. Fabry Treated Non Classic Female	Proinflammatory	IL13	0.952489	0.122939	1.78204	5.51698e-17	2.26046	0.0245813	0.0916213	-4.17958
Subgroup	Control Male .vs. Fabry Treated Non Classic Female	Vascular_Injury	CRP	-0.942508	-1.79768	-0.0873348	4.17455e-16	-2.16976	0.030889	0.105537	-4.37456
Subgroup	Control Male .vs. Fabry Treated Non Classic Female	Angiogenesis	PGF	0.80709	0.0561075	1.55807	-4.4101e-16	2.11579	0.0352694	0.111234	-4.48691
Subgroup	Control Male .vs. Fabry Treated Non Classic Female	Chemokine	CCL4	0.703419	-0.0383257	1.44516	1.92519e-16	1.86698	0.0629774	0.184434	-4.96937
Subgroup	Control Male .vs. Fabry Treated Non Classic Female	Vascular_Injury	ICAM1	-0.763651	-1.58833	0.061032	7.19539e-16	-1.82301	0.0693975	0.189687	-5.04854
Subgroup	Control Male .vs. Fabry Treated Non Classic Female	Proinflammatory	CXCL8	0.639006	-0.160533	1.43854	-8.03825e-17	1.57342	0.11678	0.29925	-5.46289
Subgroup	Control Male .vs. Fabry Treated Non Classic Female	Chemokine	CCL3	0.603777	-0.193368	1.40092	-1.52535e-16	1.49114	0.13708	0.330604	-5.5864
Subgroup	Control Male .vs. Fabry Treated Non Classic Female	Proinflammatory	IL4	0.594187	-0.247729	1.4361	4.74018e-17	1.38942	0.165838	0.377741	-5.73006
Subgroup	Control Male .vs. Fabry Treated Non Classic Female	Chemokine	CCL11	0.512919	-0.272435	1.29827	-1.9415e-16	1.28577	0.199614	0.430746	-5.86616
Subgroup	Control Male .vs. Fabry Treated Non Classic Female	Proinflammatory	IL1B	0.515111	-0.301729	1.33195	-5.53509e-17	1.24149	0.215491	0.441756	-5.92112
Subgroup	Control Male .vs. Fabry Treated Non Classic Female	Cytokine	LTA	0.511901	-0.333501	1.3573	-4.4859e-17	1.19207	0.234269	0.457382	-5.98021
Subgroup	Control Male .vs. Fabry Treated Non Classic Female	Chemokine	CCL26	0.451948	-0.316107	1.22	-1.51081e-16	1.15845	0.247695	0.461614	-6.01907
Subgroup	Control Male .vs. Fabry Treated Non Classic Female	Proinflammatory	IL6	-0.471016	-1.31288	0.370851	6.72571e-17	-1.10147	0.271664	0.46415	-6.08239
Subgroup	Control Male .vs. Fabry Treated Non Classic Female	Angiogenesis	VEGFD	0.414882	-0.326706	1.15647	-4.7955e-16	1.10139	0.271697	0.46415	-6.08247
Subgroup	Control Male .vs. Fabry Treated Non Classic Female	Angiogenesis	FLT1	-0.382097	-1.20826	0.444064	8.86632e-16	-0.91052	0.363353	0.590527	-6.27149
Subgroup	Control Male .vs. Fabry Treated Non Classic Female	Chemokine	CCL2	0.377041	-0.457385	1.21147	9.81477e-17	0.889571	0.37448	0.590527	-6.29006
Subgroup	Control Male .vs. Fabry Treated Non Classic Female	Proinflammatory	TNF	0.333831	-0.450958	1.11862	-1.54599e-16	0.837441	0.403078	0.602512	-6.33442
Subgroup	Control Male .vs. Fabry Treated Non Classic Female	Cytokine	CSF2	0.331164	-0.465833	1.12816	4.12432e-17	0.818026	0.414057	0.602512	-6.35026
Subgroup	Control Male .vs. Fabry Treated Non Classic Female	Angiogenesis	TEK	0.330438	-0.485831	1.14671	-1.07048e-15	0.796961	0.426167	0.602512	-6.36703
Subgroup	Control Male .vs. Fabry Treated Non Classic Female	Cytokine	IL17A	0.299116	-0.500923	1.09916	-8.10374e-17	0.736054	0.462331	0.626067	-6.41306
Subgroup	Control Male .vs. Fabry Treated Non Classic Female	Proinflammatory	IL10	0.274437	-0.510466	1.05934	1.23542e-16	0.688346	0.49182	0.626067	-6.44658
Subgroup	Control Male .vs. Fabry Treated Non Classic Female	Chemokine	CXCL8	0.26844	-0.513333	1.05021	-1.07009e-17	0.676	0.499614	0.626067	-6.45488
Subgroup	Control Male .vs. Fabry Treated Non Classic Female	Chemokine	CCL22	0.259379	-0.529205	1.04796	2.74249e-16	0.647541	0.517827	0.626067	-6.47346
Subgroup	Control Male .vs. Fabry Treated Non Classic Female	Proinflammatory	IL2	0.279724	-0.573468	1.13292	1.79185e-17	0.645451	0.519178	0.626067	-6.4748
Subgroup	Control Male .vs. Fabry Treated Non Classic Female	Cytokine	IL15	0.221036	-0.600523	1.0426	1.55164e-16	0.52967	0.596772	0.679536	-6.54193
Subgroup	Control Male .vs. Fabry Treated Non Classic Female	Proinflammatory	IFNG	-0.211171	-0.996278	0.573937	-5.48354e-17	-0.529523	0.596874	0.679536	-6.54201
Subgroup	Control Male .vs. Fabry Treated Non Classic Female	Chemokine	CXCL10	0.20819	-0.601761	1.01814	-2.7339e-16	0.506036	0.61324	0.679536	-6.55402
Subgroup	Control Male .vs. Fabry Treated Non Classic Female	Proinflammatory	IL12B	0.141612	-0.71548	0.998705	-7.01309e-17	0.325278	0.74522	0.804054	-6.62821
Subgroup	Control Male .vs. Fabry Treated Non Classic Female	Vascular_Injury	VCAM1	-0.116809	-0.952462	0.718844	-2.33831e-16	-0.275189	0.783379	0.823553	-6.64307
Subgroup	Control Male .vs. Fabry Treated Non Classic Female	Cytokine	IL5	-0.045302	-0.819365	0.728761	-5.61382e-17	-0.115218	0.908357	0.931066	-6.67392
Subgroup	Control Male .vs. Fabry Treated Non Classic Female	Vascular_Injury	SAA1	-0.00936301	-0.864871	0.846145	-6.15722e-17	-0.0215463	0.982826	0.982826	-6.68025
Subgroup	Control Male .vs. Fabry Treated Non Classic Male	Cytokine	IL7	1.54905	1.16239	1.9357	5.35605e-17	7.88715	7.5011e-14	2.04251e-12	20.8378
Subgroup	Control Male .vs. Fabry Treated Non Classic Male	Angiogenesis	FGF2	1.55927	1.1679	1.95065	-1.04703e-16	7.84354	9.96347e-14	2.04251e-12	20.5598
Subgroup	Control Male .vs. Fabry Treated Non Classic Male	Angiogenesis	VEGFC	1.40917	0.995404	1.82293	7.61746e-17	6.70486	1.157e-10	1.58123e-09	13.664
Subgroup	Control Male .vs. Fabry Treated Non Classic Male	Cytokine	VEGFA	1.45502	1.01878	1.89125	-3.01939e-16	6.56637	2.59636e-10	2.66127e-09	12.8767
Subgroup	Control Male .vs. Fabry Treated Non Classic Male	Cytokine	IL16	1.25882	0.736487	1.78115	-1.96658e-16	4.74456	3.37547e-06	2.30657e-05	3.7189
Subgroup	Control Male .vs. Fabry Treated Non Classic Male	Chemokine	CCL17	1.05023	0.566773	1.53368	-1.00753e-16	4.27669	2.62677e-05	0.000153854	1.76371
Subgroup	Control Male .vs. Fabry Treated Non Classic Male	Chemokine	CCL13	0.957989	0.485035	1.43094	2.176e-16	3.98769	8.57526e-05	0.000439482	0.644634
Subgroup	Control Male .vs. Fabry Treated Non Classic Male	Angiogenesis	PGF	0.951457	0.453755	1.44916	-4.4101e-16	3.76357	0.000205119	0.00093443	-0.175207
Subgroup	Control Male .vs. Fabry Treated Non Classic Male	Cytokine	IL12A	1.01869	0.479259	1.55812	-4.08231e-16	3.7178	0.000243904	0.00100001	-0.337413
Subgroup	Control Male .vs. Fabry Treated Non Classic Male	Chemokine	CCL3	0.811624	0.28333	1.33992	-1.52535e-16	3.02454	0.0027276	0.0101665	-2.57112
Subgroup	Control Male .vs. Fabry Treated Non Classic Male	Chemokine	CCL26	0.739987	0.230972	1.249	-1.51081e-16	2.86203	0.00453584	0.0154974	-3.03288
Subgroup	Control Male .vs. Fabry Treated Non Classic Male	Cytokine	IL1A	0.644118	0.184491	1.10375	-6.50974e-17	2.75893	0.00619173	0.0195278	-3.31337
Subgroup	Control Male .vs. Fabry Treated Non Classic Male	Chemokine	CXCL8	0.718906	0.200799	1.23701	-1.07009e-17	2.7317	0.00671216	0.019657	-3.38583
Subgroup	Control Male .vs. Fabry Treated Non Classic Male	Proinflammatory	IL13	0.697504	0.147733	1.24727	5.51698e-17	2.49773	0.0130889	0.0357763	-3.98029
Subgroup	Control Male .vs. Fabry Treated Non Classic Male	Cytokine	IL17A	0.656877	0.126664	1.18709	-8.10374e-17	2.43901	0.0153657	0.0393746	-4.12151
Subgroup	Control Male .vs. Fabry Treated Non Classic Male	Proinflammatory	IL4	0.673858	0.115893	1.23182	4.74018e-17	2.37761	0.0181149	0.0433692	-4.26574
Subgroup	Control Male .vs. Fabry Treated Non Classic Male	Chemokine	CCL4	0.588984	0.0974046	1.08056	1.92519e-16	2.3588	0.0190401	0.0433692	-4.30924
Subgroup	Control Male .vs. Fabry Treated Non Classic Male	Proinflammatory	CXCL8	0.577846	0.0479654	1.10773	-8.03825e-17	2.14691	0.0326823	0.0705251	-4.77604
Subgroup	Control Male .vs. Fabry Treated Non Classic Male	Chemokine	CCL11	0.517652	-0.00282861	1.03813	-1.9415e-16	1.958	0.0512493	0.105061	-5.15641
Subgroup	Control Male .vs. Fabry Treated Non Classic Male	Proinflammatory	IL1B	0.509603	-0.0317442	1.05095	-5.53509e-17	1.85326	0.0649254	0.126759	-5.35264
Subgroup	Control Male .vs. Fabry Treated Non Classic Male	Proinflammatory	IL6	-0.472419	-1.03035	0.0855147	6.72571e-17	-1.66696	0.0966708	0.180159	-5.67563
Subgroup	Control Male .vs. Fabry Treated Non Classic Male	Cytokine	LTA	0.421908	-0.138368	0.982184	-4.4859e-17	1.4825	0.139361	0.248426	-5.96239
Subgroup	Control Male .vs. Fabry Treated Non Classic Male	Proinflammatory	TNF	0.380023	-0.140082	0.900129	-1.54599e-16	1.43846	0.151449	0.258726	-6.02597
Subgroup	Control Male .vs. Fabry Treated Non Classic Male	Chemokine	CCL2	0.394593	-0.158409	0.947595	9.81477e-17	1.40476	0.16123	0.26006	-6.07335
Subgroup	Control Male .vs. Fabry Treated Non Classic Male	Proinflammatory	IFNG	-0.366819	-0.887136	0.153498	-5.48354e-17	-1.38792	0.166295	0.26006	-6.09661
Subgroup	Control Male .vs. Fabry Treated Non Classic Male	Vascular_Injury	CRP	-0.39491	-0.961662	0.171842	4.17455e-16	-1.37178	0.171259	0.26006	-6.11864
Subgroup	Control Male .vs. Fabry Treated Non Classic Male	Angiogenesis	VEGFD	0.327855	-0.16362	0.819331	-4.7955e-16	1.31329	0.190189	0.278491	-6.19636
Subgroup	Control Male .vs. Fabry Treated Non Classic Male	Vascular_Injury	ICAM1	-0.315506	-0.862051	0.231039	7.19539e-16	-1.13648	0.256754	0.362997	-6.41094
Subgroup	Control Male .vs. Fabry Treated Non Classic Male	Chemokine	CCL22	0.292941	-0.229679	0.815562	2.74249e-16	1.10351	0.270781	0.370067	-6.44756
Subgroup	Control Male .vs. Fabry Treated Non Classic Male	Chemokine	CXCL10	0.270751	-0.26603	0.807533	-2.7339e-16	0.99301	0.321586	0.425323	-6.5625
Subgroup	Control Male .vs. Fabry Treated Non Classic Male	Vascular_Injury	SAA1	-0.252212	-0.819186	0.314762	-6.15722e-17	-0.875756	0.381934	0.489352	-6.6713
Subgroup	Control Male .vs. Fabry Treated Non Classic Male	Cytokine	CSF2	0.219324	-0.308873	0.74752	4.12432e-17	0.817468	0.414375	0.514829	-6.72033
Subgroup	Control Male .vs. Fabry Treated Non Classic Male	Angiogenesis	TEK	0.206975	-0.333994	0.747944	-1.07048e-15	0.753227	0.451964	0.545015	-6.77049
Subgroup	Control Male .vs. Fabry Treated Non Classic Male	Angiogenesis	FLT1	-0.161791	-0.709316	0.385734	8.86632e-16	-0.581744	0.56122	0.657429	-6.88434
Subgroup	Control Male .vs. Fabry Treated Non Classic Male	Cytokine	IL15	0.0896506	-0.454824	0.634125	1.55164e-16	0.324157	0.746067	0.849688	-7.00048
Subgroup	Control Male .vs. Fabry Treated Non Classic Male	Proinflammatory	IL12B	0.0353511	-0.532673	0.603375	-7.01309e-17	0.122523	0.902575	0.951784	-7.04534
Subgroup	Control Male .vs. Fabry Treated Non Classic Male	Proinflammatory	IL2	0.0294746	-0.535964	0.594913	1.79185e-17	0.102622	0.918338	0.951784	-7.04757
Subgroup	Control Male .vs. Fabry Treated Non Classic Male	Cytokine	IL5	-0.0252439	-0.538241	0.487753	-5.61382e-17	-0.0968773	0.922895	0.951784	-7.04814
Subgroup	Control Male .vs. Fabry Treated Non Classic Male	Proinflammatory	IL10	0.0237081	-0.496473	0.543889	1.23542e-16	0.0897269	0.92857	0.951784	-7.04881
Subgroup	Control Male .vs. Fabry Treated Non Classic Male	Vascular_Injury	VCAM1	0.0122711	-0.541544	0.566086	-2.33831e-16	0.0436212	0.965238	0.965238	-7.05187
Subgroup	Fabry Non Treated Classic Female .vs. Fabry Non Treated Classic Male	Chemokine	CCL26	1.04876	-0.320402	2.41792	-1.51081e-16	1.508	0.132712	0.991095	-4.58231
Subgroup	Fabry Non Treated Classic Female .vs. Fabry Non Treated Classic Male	Cytokine	IL5	0.787612	-0.592257	2.16748	-5.61382e-17	1.12371	0.262124	0.991095	-4.59255
Subgroup	Fabry Non Treated Classic Female .vs. Fabry Non Treated Classic Male	Proinflammatory	IL6	-0.767705	-2.26844	0.733034	6.72571e-17	-1.00709	0.314783	0.991095	-4.59508
Subgroup	Fabry Non Treated Classic Female .vs. Fabry Non Treated Classic Male	Proinflammatory	IFNG	-0.674998	-2.07456	0.72456	-5.48354e-17	-0.949494	0.34321	0.991095	-4.59623
Subgroup	Fabry Non Treated Classic Female .vs. Fabry Non Treated Classic Male	Cytokine	IL15	0.552016	-0.912522	2.01655	1.55164e-16	0.742047	0.458698	0.991095	-4.59981
Subgroup	Fabry Non Treated Classic Female .vs. Fabry Non Treated Classic Male	Angiogenesis	FGF2	-0.355614	-1.40834	0.697107	-1.04703e-16	-0.665038	0.506589	0.991095	-4.60092
Subgroup	Fabry Non Treated Classic Female .vs. Fabry Non Treated Classic Male	Vascular_Injury	SAA1	0.499828	-1.02523	2.02488	-6.15722e-17	0.645231	0.51932	0.991095	-4.60118
Subgroup	Fabry Non Treated Classic Female .vs. Fabry Non Treated Classic Male	Cytokine	IL17A	0.449099	-0.977076	1.87527	-8.10374e-17	0.61994	0.535815	0.991095	-4.60151
Subgroup	Fabry Non Treated Classic Female .vs. Fabry Non Treated Classic Male	Angiogenesis	TEK	0.431727	-1.02338	1.88684	-1.07048e-15	0.584109	0.55963	0.991095	-4.60195
Subgroup	Fabry Non Treated Classic Female .vs. Fabry Non Treated Classic Male	Proinflammatory	IL10	-0.411607	-1.8108	0.987585	1.23542e-16	-0.579143	0.562971	0.991095	-4.60201
Subgroup	Fabry Non Treated Classic Female .vs. Fabry Non Treated Classic Male	Angiogenesis	PGF	0.383024	-0.955702	1.72175	-4.4101e-16	0.563267	0.573716	0.991095	-4.60219
Subgroup	Fabry Non Treated Classic Female .vs. Fabry Non Treated Classic Male	Chemokine	CXCL8	0.383369	-1.01024	1.77698	-1.07009e-17	0.541571	0.588557	0.991095	-4.60244
Subgroup	Fabry Non Treated Classic Female .vs. Fabry Non Treated Classic Male	Cytokine	CSF2	0.381284	-1.03947	1.80204	4.12432e-17	0.528337	0.597695	0.991095	-4.60258
Subgroup	Fabry Non Treated Classic Female .vs. Fabry Non Treated Classic Male	Angiogenesis	VEGFD	-0.330769	-1.65275	0.99121	-4.7955e-16	-0.492584	0.622703	0.991095	-4.60296
Subgroup	Fabry Non Treated Classic Female .vs. Fabry Non Treated Classic Male	Chemokine	CCL2	-0.367325	-1.8548	1.12015	9.81477e-17	-0.486162	0.627243	0.991095	-4.60302
Subgroup	Fabry Non Treated Classic Female .vs. Fabry Non Treated Classic Male	Cytokine	VEGFA	0.288145	-0.885253	1.46154	-3.01939e-16	0.483444	0.629169	0.991095	-4.60305
Subgroup	Fabry Non Treated Classic Female .vs. Fabry Non Treated Classic Male	Cytokine	LTA	0.330523	-1.17652	1.83756	-4.4859e-17	0.431774	0.666247	0.991095	-4.60353
Subgroup	Fabry Non Treated Classic Female .vs. Fabry Non Treated Classic Male	Chemokine	CCL4	0.287073	-1.03518	1.60933	1.92519e-16	0.427422	0.66941	0.991095	-4.60357
Subgroup	Fabry Non Treated Classic Female .vs. Fabry Non Treated Classic Male	Proinflammatory	TNF	0.255556	-1.14343	1.65455	-1.54599e-16	0.359628	0.719404	0.991095	-4.60412
Subgroup	Fabry Non Treated Classic Female .vs. Fabry Non Treated Classic Male	Chemokine	CCL22	0.248217	-1.15754	1.65397	2.74249e-16	0.347618	0.728395	0.991095	-4.60421
Subgroup	Fabry Non Treated Classic Female .vs. Fabry Non Treated Classic Male	Vascular_Injury	ICAM1	-0.252066	-1.72217	1.21804	7.19539e-16	-0.337557	0.735957	0.991095	-4.60428
Subgroup	Fabry Non Treated Classic Female .vs. Fabry Non Treated Classic Male	Cytokine	IL7	0.174486	-0.865549	1.21452	5.35605e-17	0.330289	0.741435	0.991095	-4.60433
Subgroup	Fabry Non Treated Classic Female .vs. Fabry Non Treated Classic Male	Proinflammatory	IL1B	-0.2239	-1.68003	1.23223	-5.53509e-17	-0.302716	0.762337	0.991095	-4.6045
Subgroup	Fabry Non Treated Classic Female .vs. Fabry Non Treated Classic Male	Cytokine	IL16	0.189381	-1.2156	1.59436	-1.96658e-16	0.265367	0.790928	0.991095	-4.60472
Subgroup	Fabry Non Treated Classic Female .vs. Fabry Non Treated Classic Male	Chemokine	CCL3	0.182996	-1.23802	1.60401	-1.52535e-16	0.253526	0.800053	0.991095	-4.60478
Subgroup	Fabry Non Treated Classic Female .vs. Fabry Non Treated Classic Male	Proinflammatory	IL4	0.171972	-1.32885	1.6728	4.74018e-17	0.225584	0.821694	0.991095	-4.60492
Subgroup	Fabry Non Treated Classic Female .vs. Fabry Non Treated Classic Male	Proinflammatory	IL13	0.130009	-1.34877	1.60879	5.51698e-17	0.173081	0.862716	0.991095	-4.60514
Subgroup	Fabry Non Treated Classic Female .vs. Fabry Non Treated Classic Male	Proinflammatory	IL12B	0.117662	-1.41022	1.64554	-7.01309e-17	0.151609	0.879607	0.991095	-4.60521
Subgroup	Fabry Non Treated Classic Female .vs. Fabry Non Treated Classic Male	Chemokine	CCL11	0.0997888	-1.30021	1.49979	-1.9415e-16	0.140325	0.888507	0.991095	-4.60524
Subgroup	Fabry Non Treated Classic Female .vs. Fabry Non Treated Classic Male	Chemokine	CCL13	0.0901828	-1.18198	1.36234	2.176e-16	0.13956	0.88911	0.991095	-4.60524
Subgroup	Fabry Non Treated Classic Female .vs. Fabry Non Treated Classic Male	Proinflammatory	CXCL8	-0.0782478	-1.50353	1.34704	-8.03825e-17	-0.108082	0.914011	0.991095	-4.60532
Subgroup	Fabry Non Treated Classic Female .vs. Fabry Non Treated Classic Male	Cytokine	IL1A	0.0573542	-1.17896	1.29367	-6.50974e-17	0.0913308	0.927297	0.991095	-4.60536
Subgroup	Fabry Non Treated Classic Female .vs. Fabry Non Treated Classic Male	Angiogenesis	FLT1	-0.064588	-1.53733	1.40815	8.86632e-16	-0.0863387	0.931261	0.991095	-4.60537
Subgroup	Fabry Non Treated Classic Female .vs. Fabry Non Treated Classic Male	Vascular_Injury	VCAM1	0.063373	-1.42629	1.55303	-2.33831e-16	0.0837523	0.933315	0.991095	-4.60537
Subgroup	Fabry Non Treated Classic Female .vs. Fabry Non Treated Classic Male	Cytokine	IL12A	0.0471571	-1.40382	1.49813	-4.08231e-16	0.0639835	0.94903	0.991095	-4.6054
Subgroup	Fabry Non Treated Classic Female .vs. Fabry Non Treated Classic Male	Proinflammatory	IL2	-0.037009	-1.55794	1.48392	1.79185e-17	-0.0479048	0.961827	0.991095	-4.60542
Subgroup	Fabry Non Treated Classic Female .vs. Fabry Non Treated Classic Male	Vascular_Injury	CRP	0.0338817	-1.49058	1.55834	4.17455e-16	0.0437552	0.965132	0.991095	-4.60542
Subgroup	Fabry Non Treated Classic Female .vs. Fabry Non Treated Classic Male	Chemokine	CCL17	0.0284043	-1.272	1.32881	-1.00753e-16	0.0430018	0.965732	0.991095	-4.60542
Subgroup	Fabry Non Treated Classic Female .vs. Fabry Non Treated Classic Male	Angiogenesis	VEGFC	0.00851725	-1.10443	1.12147	7.61746e-17	0.0150662	0.98799	0.991095	-4.60544
Subgroup	Fabry Non Treated Classic Female .vs. Fabry Non Treated Classic Male	Chemokine	CXCL10	0.00819313	-1.43565	1.45204	-2.7339e-16	0.0111715	0.991095	0.991095	-4.60544
Subgroup	Fabry Non Treated Classic Female .vs. Fabry Non Treated Non Classic Female	Chemokine	CCL26	-0.769549	-1.59518	0.056085	-1.51081e-16	-1.83497	0.0675995	0.988711	-4.53242
Subgroup	Fabry Non Treated Classic Female .vs. Fabry Non Treated Non Classic Female	Chemokine	CXCL8	0.782577	-0.0578032	1.62296	-1.07009e-17	1.83329	0.0678494	0.988711	-4.53258
Subgroup	Fabry Non Treated Classic Female .vs. Fabry Non Treated Non Classic Female	Cytokine	IL5	-0.707874	-1.53997	0.124219	-5.61382e-17	-1.67481	0.095119	0.988711	-4.54739
Subgroup	Fabry Non Treated Classic Female .vs. Fabry Non Treated Non Classic Female	Cytokine	CSF2	-0.574682	-1.43143	0.282064	4.12432e-17	-1.32055	0.187758	0.988711	-4.57582
Subgroup	Fabry Non Treated Classic Female .vs. Fabry Non Treated Non Classic Female	Chemokine	CCL3	0.495508	-0.361397	1.35241	-1.52535e-16	1.13841	0.255949	0.988711	-4.58789
Subgroup	Fabry Non Treated Classic Female .vs. Fabry Non Treated Non Classic Female	Proinflammatory	TNF	0.441309	-0.402313	1.28493	-1.54599e-16	1.02985	0.303991	0.988711	-4.59424
Subgroup	Fabry Non Treated Classic Female .vs. Fabry Non Treated Non Classic Female	Cytokine	IL15	-0.415862	-1.29901	0.467288	1.55164e-16	-0.927033	0.354729	0.988711	-4.59968
Subgroup	Fabry Non Treated Classic Female .vs. Fabry Non Treated Non Classic Female	Angiogenesis	VEGFC	0.301491	-0.369644	0.972626	7.61746e-17	0.884393	0.377264	0.988711	-4.60178
Subgroup	Fabry Non Treated Classic Female .vs. Fabry Non Treated Non Classic Female	Proinflammatory	IL12B	-0.409466	-1.33081	0.51188	-7.01309e-17	-0.874934	0.38238	0.988711	-4.60223
Subgroup	Fabry Non Treated Classic Female .vs. Fabry Non Treated Non Classic Female	Angiogenesis	PGF	0.356687	-0.450596	1.16397	-4.4101e-16	0.869844	0.385151	0.988711	-4.60247
Subgroup	Fabry Non Treated Classic Female .vs. Fabry Non Treated Non Classic Female	Proinflammatory	IFNG	0.339295	-0.504671	1.18326	-5.48354e-17	0.791467	0.42936	0.988711	-4.60599
Subgroup	Fabry Non Treated Classic Female .vs. Fabry Non Treated Non Classic Female	Proinflammatory	IL4	-0.353165	-1.2582	0.551867	4.74018e-17	-0.768236	0.443012	0.988711	-4.60698
Subgroup	Fabry Non Treated Classic Female .vs. Fabry Non Treated Non Classic Female	Cytokine	IL12A	0.323896	-0.551074	1.19887	-4.08231e-16	0.728774	0.466765	0.988711	-4.60858
Subgroup	Fabry Non Treated Classic Female .vs. Fabry Non Treated Non Classic Female	Cytokine	LTA	-0.331201	-1.23998	0.577579	-4.4859e-17	-0.717486	0.473688	0.988711	-4.60902
Subgroup	Fabry Non Treated Classic Female .vs. Fabry Non Treated Non Classic Female	Angiogenesis	VEGFD	-0.263418	-1.0606	0.533765	-4.7955e-16	-0.65053	0.515898	0.988711	-4.61151
Subgroup	Fabry Non Treated Classic Female .vs. Fabry Non Treated Non Classic Female	Chemokine	CCL22	-0.223225	-1.07093	0.624477	2.74249e-16	-0.518418	0.604587	0.988711	-4.6157
Subgroup	Fabry Non Treated Classic Female .vs. Fabry Non Treated Non Classic Female	Proinflammatory	CXCL8	0.20628	-0.653198	1.06576	-8.03825e-17	0.472502	0.636947	0.988711	-4.61694
Subgroup	Fabry Non Treated Classic Female .vs. Fabry Non Treated Non Classic Female	Cytokine	IL17A	0.199714	-0.660302	1.05973	-8.10374e-17	0.457175	0.64791	0.988711	-4.61733
Subgroup	Fabry Non Treated Classic Female .vs. Fabry Non Treated Non Classic Female	Chemokine	CCL2	-0.192564	-1.08955	0.704417	9.81477e-17	-0.422642	0.672889	0.988711	-4.61815
Subgroup	Fabry Non Treated Classic Female .vs. Fabry Non Treated Non Classic Female	Angiogenesis	FLT1	-0.14787	-1.03597	0.740227	8.86632e-16	-0.327793	0.74332	0.988711	-4.62009
Subgroup	Fabry Non Treated Classic Female .vs. Fabry Non Treated Non Classic Female	Angiogenesis	FGF2	-0.0948891	-0.729704	0.539926	-1.04703e-16	-0.294272	0.768774	0.988711	-4.62066
Subgroup	Fabry Non Treated Classic Female .vs. Fabry Non Treated Non Classic Female	Cytokine	IL16	-0.125035	-0.972271	0.722201	-1.96658e-16	-0.29054	0.771624	0.988711	-4.62072
Subgroup	Fabry Non Treated Classic Female .vs. Fabry Non Treated Non Classic Female	Vascular_Injury	ICAM1	-0.128501	-1.01501	0.758007	7.19539e-16	-0.285367	0.775579	0.988711	-4.6208
Subgroup	Fabry Non Treated Classic Female .vs. Fabry Non Treated Non Classic Female	Proinflammatory	IL2	-0.123667	-1.04082	0.793486	1.79185e-17	-0.265457	0.790858	0.988711	-4.62109
Subgroup	Fabry Non Treated Classic Female .vs. Fabry Non Treated Non Classic Female	Chemokine	CCL11	0.107926	-0.736305	0.952156	-1.9415e-16	0.251677	0.80148	0.988711	-4.62129
Subgroup	Fabry Non Treated Classic Female .vs. Fabry Non Treated Non Classic Female	Cytokine	IL1A	-0.0731095	-0.818634	0.672415	-6.50974e-17	-0.19306	0.847056	0.988711	-4.622
Subgroup	Fabry Non Treated Classic Female .vs. Fabry Non Treated Non Classic Female	Proinflammatory	IL6	-0.0804003	-0.98538	0.824579	6.72571e-17	-0.174904	0.861285	0.988711	-4.62218
Subgroup	Fabry Non Treated Classic Female .vs. Fabry Non Treated Non Classic Female	Cytokine	VEGFA	0.0618895	-0.645696	0.769475	-3.01939e-16	0.172194	0.863413	0.988711	-4.62221
Subgroup	Fabry Non Treated Classic Female .vs. Fabry Non Treated Non Classic Female	Vascular_Injury	SAA1	0.0802171	-0.839426	0.99986	-6.15722e-17	0.171723	0.863783	0.988711	-4.62221
Subgroup	Fabry Non Treated Classic Female .vs. Fabry Non Treated Non Classic Female	Proinflammatory	IL13	-0.0709428	-0.962683	0.820797	5.51698e-17	-0.156621	0.875659	0.988711	-4.62235
Subgroup	Fabry Non Treated Classic Female .vs. Fabry Non Treated Non Classic Female	Vascular_Injury	CRP	-0.072732	-0.992016	0.846552	4.17455e-16	-0.15576	0.876337	0.988711	-4.62235
Subgroup	Fabry Non Treated Classic Female .vs. Fabry Non Treated Non Classic Female	Cytokine	IL7	-0.0477338	-0.674899	0.579431	5.35605e-17	-0.149839	0.881002	0.988711	-4.6224
Subgroup	Fabry Non Treated Classic Female .vs. Fabry Non Treated Non Classic Female	Chemokine	CCL17	-0.038144	-0.822317	0.746029	-1.00753e-16	-0.0957623	0.92378	0.988711	-4.62276
Subgroup	Fabry Non Treated Classic Female .vs. Fabry Non Treated Non Classic Female	Proinflammatory	IL1B	-0.0279078	-0.905985	0.850169	-5.53509e-17	-0.0625709	0.950154	0.988711	-4.62291
Subgroup	Fabry Non Treated Classic Female .vs. Fabry Non Treated Non Classic Female	Chemokine	CCL13	-0.0201206	-0.787262	0.747021	2.176e-16	-0.0516352	0.958857	0.988711	-4.62294
Subgroup	Fabry Non Treated Classic Female .vs. Fabry Non Treated Non Classic Female	Vascular_Injury	VCAM1	0.0201158	-0.878184	0.918416	-2.33831e-16	0.0440856	0.964868	0.988711	-4.62296
Subgroup	Fabry Non Treated Classic Female .vs. Fabry Non Treated Non Classic Female	Chemokine	CCL4	-0.017144	-0.814495	0.780207	1.92519e-16	-0.0423294	0.966267	0.988711	-4.62296
Subgroup	Fabry Non Treated Classic Female .vs. Fabry Non Treated Non Classic Female	Angiogenesis	TEK	-0.0171601	-0.894624	0.860303	-1.07048e-15	-0.0385009	0.969317	0.988711	-4.62297
Subgroup	Fabry Non Treated Classic Female .vs. Fabry Non Treated Non Classic Female	Proinflammatory	IL10	0.0122985	-0.831446	0.856043	1.23542e-16	0.0286959	0.977128	0.988711	-4.62299
Subgroup	Fabry Non Treated Classic Female .vs. Fabry Non Treated Non Classic Female	Chemokine	CXCL10	0.0062634	-0.864407	0.876934	-2.7339e-16	0.0141624	0.988711	0.988711	-4.62301
Subgroup	Fabry Non Treated Classic Female .vs. Fabry Non Treated Non Classic Male	Proinflammatory	IFNG	-2.03875	-3.2323	-0.845203	-5.48354e-17	-3.36283	0.000882038	0.0361636	-0.827921
Subgroup	Fabry Non Treated Classic Female .vs. Fabry Non Treated Non Classic Male	Chemokine	CXCL8	0.760636	-0.427841	1.94911	-1.07009e-17	1.25999	0.208751	0.990554	-5.36307
Subgroup	Fabry Non Treated Classic Female .vs. Fabry Non Treated Non Classic Male	Cytokine	IL1A	0.603813	-0.450518	1.65814	-6.50974e-17	1.12747	0.260534	0.990554	-5.51349
Subgroup	Fabry Non Treated Classic Female .vs. Fabry Non Treated Non Classic Male	Proinflammatory	IL4	-0.68385	-1.96376	0.596058	4.74018e-17	-1.05187	0.29379	0.990554	-5.59189
Subgroup	Fabry Non Treated Classic Female .vs. Fabry Non Treated Non Classic Male	Vascular_Injury	ICAM1	-0.584141	-1.83785	0.66957	7.19539e-16	-0.917278	0.359808	0.990554	-5.71812
Subgroup	Fabry Non Treated Classic Female .vs. Fabry Non Treated Non Classic Male	Proinflammatory	IL12B	-0.57492	-1.8779	0.72806	-7.01309e-17	-0.86866	0.385797	0.990554	-5.7595
Subgroup	Fabry Non Treated Classic Female .vs. Fabry Non Treated Non Classic Male	Cytokine	IL15	-0.539377	-1.78834	0.709585	1.55164e-16	-0.850205	0.395957	0.990554	-5.77462
Subgroup	Fabry Non Treated Classic Female .vs. Fabry Non Treated Non Classic Male	Cytokine	LTA	-0.524691	-1.8099	0.760518	-4.4859e-17	-0.80373	0.422253	0.990554	-5.81127
Subgroup	Fabry Non Treated Classic Female .vs. Fabry Non Treated Non Classic Male	Cytokine	CSF2	-0.463621	-1.67524	0.748001	4.12432e-17	-0.753314	0.451911	0.990554	-5.84871
Subgroup	Fabry Non Treated Classic Female .vs. Fabry Non Treated Non Classic Male	Cytokine	VEGFA	-0.373796	-1.37447	0.626881	-3.01939e-16	-0.735396	0.462731	0.990554	-5.86144
Subgroup	Fabry Non Treated Classic Female .vs. Fabry Non Treated Non Classic Male	Cytokine	IL17A	-0.404528	-1.62077	0.811719	-8.10374e-17	-0.654798	0.51315	0.990554	-5.9149
Subgroup	Fabry Non Treated Classic Female .vs. Fabry Non Treated Non Classic Male	Proinflammatory	IL10	-0.374592	-1.56783	0.818643	1.23542e-16	-0.618035	0.537069	0.990554	-5.93724
Subgroup	Fabry Non Treated Classic Female .vs. Fabry Non Treated Non Classic Male	Chemokine	CCL3	-0.343566	-1.55541	0.86828	-1.52535e-16	-0.55814	0.577207	0.990554	-5.97087
Subgroup	Fabry Non Treated Classic Female .vs. Fabry Non Treated Non Classic Male	Angiogenesis	VEGFC	0.250105	-0.699023	1.19923	7.61746e-17	0.518774	0.604339	0.990554	-5.99111
Subgroup	Fabry Non Treated Classic Female .vs. Fabry Non Treated Non Classic Male	Proinflammatory	IL13	-0.294032	-1.55514	0.967079	5.51698e-17	-0.459009	0.646593	0.990554	-6.01902
Subgroup	Fabry Non Treated Classic Female .vs. Fabry Non Treated Non Classic Male	Cytokine	IL16	-0.249869	-1.44804	0.948303	-1.96658e-16	-0.410557	0.68172	0.990554	-6.03915
Subgroup	Fabry Non Treated Classic Female .vs. Fabry Non Treated Non Classic Male	Angiogenesis	FGF2	-0.180764	-1.07853	0.717	-1.04703e-16	-0.396396	0.692123	0.990554	-6.04461
Subgroup	Fabry Non Treated Classic Female .vs. Fabry Non Treated Non Classic Male	Chemokine	CXCL10	-0.215339	-1.44665	1.01597	-2.7339e-16	-0.344299	0.730887	0.990554	-6.06304
Subgroup	Fabry Non Treated Classic Female .vs. Fabry Non Treated Non Classic Male	Chemokine	CCL13	0.179782	-0.90512	1.26468	2.176e-16	0.326239	0.744494	0.990554	-6.06883
Subgroup	Fabry Non Treated Classic Female .vs. Fabry Non Treated Non Classic Male	Proinflammatory	IL6	0.205587	-1.07425	1.48542	6.72571e-17	0.316244	0.752059	0.990554	-6.0719
Subgroup	Fabry Non Treated Classic Female .vs. Fabry Non Treated Non Classic Male	Chemokine	CCL4	0.157695	-0.96993	1.28532	1.92519e-16	0.275318	0.78328	0.990554	-6.08347
Subgroup	Fabry Non Treated Classic Female .vs. Fabry Non Treated Non Classic Male	Proinflammatory	IL2	0.179579	-1.11747	1.47663	1.79185e-17	0.272571	0.785389	0.990554	-6.08419
Subgroup	Fabry Non Treated Classic Female .vs. Fabry Non Treated Non Classic Male	Vascular_Injury	VCAM1	-0.173293	-1.44368	1.0971	-2.33831e-16	-0.26855	0.788479	0.990554	-6.08523
Subgroup	Fabry Non Treated Classic Female .vs. Fabry Non Treated Non Classic Male	Angiogenesis	FLT1	-0.170403	-1.42636	1.08556	8.86632e-16	-0.267105	0.78959	0.990554	-6.0856
Subgroup	Fabry Non Treated Classic Female .vs. Fabry Non Treated Non Classic Male	Proinflammatory	TNF	-0.155375	-1.34844	1.03769	-1.54599e-16	-0.256388	0.797844	0.990554	-6.08828
Subgroup	Fabry Non Treated Classic Female .vs. Fabry Non Treated Non Classic Male	Proinflammatory	CXCL8	0.141873	-1.07361	1.35736	-8.03825e-17	0.22979	0.818428	0.990554	-6.09446
Subgroup	Fabry Non Treated Classic Female .vs. Fabry Non Treated Non Classic Male	Chemokine	CCL26	-0.135585	-1.30321	1.03204	-1.51081e-16	-0.228607	0.819346	0.990554	-6.09472
Subgroup	Fabry Non Treated Classic Female .vs. Fabry Non Treated Non Classic Male	Cytokine	IL12A	-0.118167	-1.35556	1.11923	-4.08231e-16	-0.188005	0.851013	0.990554	-6.1028
Subgroup	Fabry Non Treated Classic Female .vs. Fabry Non Treated Non Classic Male	Chemokine	CCL22	-0.113495	-1.31233	1.08534	2.74249e-16	-0.18638	0.852286	0.990554	-6.1031
Subgroup	Fabry Non Treated Classic Female .vs. Fabry Non Treated Non Classic Male	Cytokine	IL5	-0.109615	-1.28637	1.06714	-5.61382e-17	-0.183385	0.854632	0.990554	-6.10362
Subgroup	Fabry Non Treated Classic Female .vs. Fabry Non Treated Non Classic Male	Vascular_Injury	CRP	0.118162	-1.1819	1.41823	4.17455e-16	0.178934	0.858122	0.990554	-6.1044
Subgroup	Fabry Non Treated Classic Female .vs. Fabry Non Treated Non Classic Male	Cytokine	IL7	-0.0699991	-0.956944	0.816946	5.35605e-17	-0.155373	0.876642	0.990554	-6.10816
Subgroup	Fabry Non Treated Classic Female .vs. Fabry Non Treated Non Classic Male	Chemokine	CCL17	0.0872337	-1.02175	1.19622	-1.00753e-16	0.15486	0.877047	0.990554	-6.10824
Subgroup	Fabry Non Treated Classic Female .vs. Fabry Non Treated Non Classic Male	Proinflammatory	IL1B	0.0842386	-1.15755	1.32603	-5.53509e-17	0.13355	0.893857	0.990554	-6.11117
Subgroup	Fabry Non Treated Classic Female .vs. Fabry Non Treated Non Classic Male	Vascular_Injury	SAA1	-0.0615913	-1.36216	1.23898	-6.15722e-17	-0.0932321	0.925788	0.990554	-6.11555
Subgroup	Fabry Non Treated Classic Female .vs. Fabry Non Treated Non Classic Male	Chemokine	CCL2	0.0447373	-1.22379	1.31326	9.81477e-17	0.0694307	0.944698	0.990554	-6.1174
Subgroup	Fabry Non Treated Classic Female .vs. Fabry Non Treated Non Classic Male	Chemokine	CCL11	0.0339766	-1.15995	1.2279	-1.9415e-16	0.0560252	0.955363	0.990554	-6.1182
Subgroup	Fabry Non Treated Classic Female .vs. Fabry Non Treated Non Classic Male	Angiogenesis	VEGFD	0.024661	-1.10273	1.15205	-4.7955e-16	0.0430643	0.965682	0.990554	-6.11881
Subgroup	Fabry Non Treated Classic Female .vs. Fabry Non Treated Non Classic Male	Angiogenesis	TEK	-0.0264758	-1.2674	1.21444	-1.07048e-15	-0.0420034	0.966527	0.990554	-6.11886
Subgroup	Fabry Non Treated Classic Female .vs. Fabry Non Treated Non Classic Male	Angiogenesis	PGF	-0.00687214	-1.14854	1.1348	-4.4101e-16	-0.0118504	0.990554	0.990554	-6.11963
Subgroup	Fabry Non Treated Classic Female .vs. Fabry Treated Classic Female	Angiogenesis	VEGFC	0.606329	-0.033573	1.24623	7.61746e-17	1.86541	0.0631975	0.985126	-4.52332
Subgroup	Fabry Non Treated Classic Female .vs. Fabry Treated Classic Female	Angiogenesis	PGF	0.578277	-0.191437	1.34799	-4.4101e-16	1.47906	0.140278	0.985126	-4.56105
Subgroup	Fabry Non Treated Classic Female .vs. Fabry Treated Classic Female	Proinflammatory	IL13	-0.558511	-1.40875	0.29173	5.51698e-17	-1.29321	0.197032	0.985126	-4.57619
Subgroup	Fabry Non Treated Classic Female .vs. Fabry Treated Classic Female	Chemokine	CXCL8	0.514796	-0.286475	1.31607	-1.07009e-17	1.26484	0.207009	0.985126	-4.57833
Subgroup	Fabry Non Treated Classic Female .vs. Fabry Treated Classic Female	Proinflammatory	IFNG	-0.440868	-1.24556	0.363821	-5.48354e-17	-1.0786	0.281719	0.985126	-4.5912
Subgroup	Fabry Non Treated Classic Female .vs. Fabry Treated Classic Female	Proinflammatory	IL12B	-0.386317	-1.26479	0.492153	-7.01309e-17	-0.865759	0.387384	0.985126	-4.60345
Subgroup	Fabry Non Treated Classic Female .vs. Fabry Treated Classic Female	Proinflammatory	CXCL8	0.321012	-0.498469	1.14049	-8.03825e-17	0.771192	0.441261	0.985126	-4.60804
Subgroup	Fabry Non Treated Classic Female .vs. Fabry Treated Classic Female	Proinflammatory	IL4	-0.315568	-1.17848	0.547346	4.74018e-17	-0.719957	0.472169	0.985126	-4.61031
Subgroup	Fabry Non Treated Classic Female .vs. Fabry Treated Classic Female	Angiogenesis	VEGFD	0.271719	-0.488366	1.0318	-4.7955e-16	0.703782	0.482169	0.985126	-4.61099
Subgroup	Fabry Non Treated Classic Female .vs. Fabry Treated Classic Female	Cytokine	IL17A	-0.283717	-1.10371	0.536276	-8.10374e-17	-0.681171	0.496342	0.985126	-4.61192
Subgroup	Fabry Non Treated Classic Female .vs. Fabry Treated Classic Female	Vascular_Injury	CRP	-0.274796	-1.1513	0.601707	4.17455e-16	-0.617217	0.537607	0.985126	-4.61439
Subgroup	Fabry Non Treated Classic Female .vs. Fabry Treated Classic Female	Proinflammatory	IL10	-0.251769	-1.05625	0.55271	1.23542e-16	-0.616124	0.538327	0.985126	-4.61443
Subgroup	Fabry Non Treated Classic Female .vs. Fabry Treated Classic Female	Chemokine	CCL3	0.251245	-0.565782	1.06827	-1.52535e-16	0.605399	0.545418	0.985126	-4.61481
Subgroup	Fabry Non Treated Classic Female .vs. Fabry Treated Classic Female	Vascular_Injury	SAA1	0.265766	-0.611079	1.14261	-6.15722e-17	0.596702	0.551202	0.985126	-4.61513
Subgroup	Fabry Non Treated Classic Female .vs. Fabry Treated Classic Female	Cytokine	IL7	0.164018	-0.43396	0.761996	5.35605e-17	0.539991	0.589644	0.985126	-4.61704
Subgroup	Fabry Non Treated Classic Female .vs. Fabry Treated Classic Female	Chemokine	CCL11	0.219852	-0.585091	1.02479	-1.9415e-16	0.537706	0.591219	0.985126	-4.61711
Subgroup	Fabry Non Treated Classic Female .vs. Fabry Treated Classic Female	Vascular_Injury	ICAM1	-0.219976	-1.06523	0.625276	7.19539e-16	-0.512353	0.608819	0.985126	-4.61791
Subgroup	Fabry Non Treated Classic Female .vs. Fabry Treated Classic Female	Angiogenesis	FGF2	-0.14471	-0.749982	0.460562	-1.04703e-16	-0.470682	0.638244	0.985126	-4.61912
Subgroup	Fabry Non Treated Classic Female .vs. Fabry Treated Classic Female	Proinflammatory	IL6	-0.192123	-1.05499	0.670742	6.72571e-17	-0.438346	0.661483	0.985126	-4.62
Subgroup	Fabry Non Treated Classic Female .vs. Fabry Treated Classic Female	Chemokine	CCL13	0.152292	-0.579149	0.883733	2.176e-16	0.4099	0.682201	0.985126	-4.62072
Subgroup	Fabry Non Treated Classic Female .vs. Fabry Treated Classic Female	Chemokine	CCL4	0.142924	-0.61732	0.903169	1.92519e-16	0.370112	0.711586	0.985126	-4.62164
Subgroup	Fabry Non Treated Classic Female .vs. Fabry Treated Classic Female	Cytokine	LTA	-0.145467	-1.01195	0.72102	-4.4859e-17	-0.330509	0.741269	0.985126	-4.62247
Subgroup	Fabry Non Treated Classic Female .vs. Fabry Treated Classic Female	Angiogenesis	TEK	0.139992	-0.696637	0.97662	-1.07048e-15	0.32942	0.742091	0.985126	-4.62249
Subgroup	Fabry Non Treated Classic Female .vs. Fabry Treated Classic Female	Cytokine	IL5	0.130786	-0.662583	0.924155	-5.61382e-17	0.324538	0.74578	0.985126	-4.62258
Subgroup	Fabry Non Treated Classic Female .vs. Fabry Treated Classic Female	Proinflammatory	IL2	-0.141139	-1.01561	0.733332	1.79185e-17	-0.317747	0.75092	0.985126	-4.62271
Subgroup	Fabry Non Treated Classic Female .vs. Fabry Treated Classic Female	Chemokine	CCL2	0.136347	-0.718891	0.991586	9.81477e-17	0.313863	0.753865	0.985126	-4.62279
Subgroup	Fabry Non Treated Classic Female .vs. Fabry Treated Classic Female	Chemokine	CCL17	-0.111702	-0.859381	0.635978	-1.00753e-16	-0.29412	0.76889	0.985126	-4.62314
Subgroup	Fabry Non Treated Classic Female .vs. Fabry Treated Classic Female	Cytokine	IL1A	0.104626	-0.606203	0.815456	-6.50974e-17	0.289772	0.772211	0.985126	-4.62322
Subgroup	Fabry Non Treated Classic Female .vs. Fabry Treated Classic Female	Cytokine	IL12A	0.115756	-0.718495	0.950007	-4.08231e-16	0.273167	0.784932	0.985126	-4.6235
Subgroup	Fabry Non Treated Classic Female .vs. Fabry Treated Classic Female	Chemokine	CXCL10	-0.11443	-0.944582	0.715721	-2.7339e-16	-0.271371	0.786311	0.985126	-4.62353
Subgroup	Fabry Non Treated Classic Female .vs. Fabry Treated Classic Female	Chemokine	CCL22	0.0983816	-0.709871	0.906634	2.74249e-16	0.239633	0.810795	0.985126	-4.62401
Subgroup	Fabry Non Treated Classic Female .vs. Fabry Treated Classic Female	Proinflammatory	IL1B	-0.0939765	-0.93119	0.743237	-5.53509e-17	-0.220985	0.825269	0.985126	-4.62426
Subgroup	Fabry Non Treated Classic Female .vs. Fabry Treated Classic Female	Angiogenesis	FLT1	-0.0809883	-0.927756	0.765779	8.86632e-16	-0.188295	0.850786	0.985126	-4.62466
Subgroup	Fabry Non Treated Classic Female .vs. Fabry Treated Classic Female	Cytokine	IL15	0.0751527	-0.766897	0.917203	1.55164e-16	0.175706	0.860655	0.985126	-4.6248
Subgroup	Fabry Non Treated Classic Female .vs. Fabry Treated Classic Female	Proinflammatory	TNF	0.063606	-0.740756	0.867968	-1.54599e-16	0.155678	0.876402	0.985126	-4.625
Subgroup	Fabry Non Treated Classic Female .vs. Fabry Treated Classic Female	Cytokine	VEGFA	-0.0392714	-0.713928	0.635385	-3.01939e-16	-0.114597	0.908849	0.985126	-4.62533
Subgroup	Fabry Non Treated Classic Female .vs. Fabry Treated Classic Female	Vascular_Injury	VCAM1	-0.0359483	-0.892444	0.820547	-2.33831e-16	-0.0826292	0.934207	0.985126	-4.62552
Subgroup	Fabry Non Treated Classic Female .vs. Fabry Treated Classic Female	Cytokine	CSF2	0.0295886	-0.787286	0.846464	4.12432e-17	0.0713099	0.943203	0.985126	-4.62557
Subgroup	Fabry Non Treated Classic Female .vs. Fabry Treated Classic Female	Cytokine	IL16	0.0118915	-0.795916	0.819699	-1.96658e-16	0.0289807	0.976901	0.985126	-4.62569
Subgroup	Fabry Non Treated Classic Female .vs. Fabry Treated Classic Female	Chemokine	CCL26	0.00746148	-0.77975	0.794673	-1.51081e-16	0.0186601	0.985126	0.985126	-4.62571
Subgroup	Fabry Non Treated Classic Female .vs. Fabry Treated Classic Male	Chemokine	CXCL8	0.96537	0.179266	1.75147	-1.07009e-17	2.41765	0.0162771	0.667359	-4.45006
Subgroup	Fabry Non Treated Classic Female .vs. Fabry Treated Classic Male	Cytokine	IL5	0.522751	-0.2556	1.3011	-5.61382e-17	1.32221	0.187207	0.990207	-4.57322
Subgroup	Fabry Non Treated Classic Female .vs. Fabry Treated Classic Male	Cytokine	IL1A	-0.396905	-1.09428	0.30047	-6.50974e-17	-1.12047	0.263499	0.990207	-4.58828
Subgroup	Fabry Non Treated Classic Female .vs. Fabry Treated Classic Male	Angiogenesis	PGF	0.386809	-0.368335	1.14195	-4.4101e-16	1.00843	0.314141	0.990207	-4.59558
Subgroup	Fabry Non Treated Classic Female .vs. Fabry Treated Classic Male	Cytokine	IL15	0.417335	-0.408776	1.24345	1.55164e-16	0.99455	0.320837	0.990207	-4.59644
Subgroup	Fabry Non Treated Classic Female .vs. Fabry Treated Classic Male	Angiogenesis	VEGFC	0.300392	-0.327398	0.928181	7.61746e-17	0.942007	0.347023	0.990207	-4.59956
Subgroup	Fabry Non Treated Classic Female .vs. Fabry Treated Classic Male	Proinflammatory	CXCL8	0.371495	-0.432473	1.17546	-8.03825e-17	0.909692	0.363789	0.990207	-4.60139
Subgroup	Fabry Non Treated Classic Female .vs. Fabry Treated Classic Male	Cytokine	IL12A	0.36244	-0.456019	1.1809	-4.08231e-16	0.871806	0.384081	0.990207	-4.60347
Subgroup	Fabry Non Treated Classic Female .vs. Fabry Treated Classic Male	Chemokine	CCL13	0.296254	-0.421341	1.01385	2.176e-16	0.812766	0.417061	0.990207	-4.60652
Subgroup	Fabry Non Treated Classic Female .vs. Fabry Treated Classic Male	Proinflammatory	TNF	0.321698	-0.467438	1.11083	-1.54599e-16	0.802558	0.422929	0.990207	-4.60703
Subgroup	Fabry Non Treated Classic Female .vs. Fabry Treated Classic Male	Proinflammatory	IL12B	-0.284311	-1.14615	0.57753	-7.01309e-17	-0.649452	0.516593	0.990207	-4.61387
Subgroup	Fabry Non Treated Classic Female .vs. Fabry Treated Classic Male	Cytokine	CSF2	-0.262481	-1.06389	0.538931	4.12432e-17	-0.644796	0.519601	0.990207	-4.61405
Subgroup	Fabry Non Treated Classic Female .vs. Fabry Treated Classic Male	Chemokine	CCL11	0.25433	-0.535376	1.04404	-1.9415e-16	0.634033	0.526591	0.990207	-4.61448
Subgroup	Fabry Non Treated Classic Female .vs. Fabry Treated Classic Male	Chemokine	CCL3	0.255445	-0.546116	1.05701	-1.52535e-16	0.627395	0.530926	0.990207	-4.61474
Subgroup	Fabry Non Treated Classic Female .vs. Fabry Treated Classic Male	Cytokine	IL7	0.173246	-0.413413	0.759905	5.35605e-17	0.581378	0.561466	0.990207	-4.61645
Subgroup	Fabry Non Treated Classic Female .vs. Fabry Treated Classic Male	Chemokine	CCL4	0.192514	-0.55334	0.938368	1.92519e-16	0.508146	0.611762	0.990207	-4.61891
Subgroup	Fabry Non Treated Classic Female .vs. Fabry Treated Classic Male	Angiogenesis	TEK	0.196722	-0.62407	1.01751	-1.07048e-15	0.471845	0.637415	0.990207	-4.62
Subgroup	Fabry Non Treated Classic Female .vs. Fabry Treated Classic Male	Chemokine	CCL26	-0.179436	-0.951746	0.592874	-1.51081e-16	-0.457403	0.647746	0.990207	-4.62042
Subgroup	Fabry Non Treated Classic Female .vs. Fabry Treated Classic Male	Proinflammatory	IL10	0.172907	-0.616344	0.962157	1.23542e-16	0.431297	0.666593	0.990207	-4.62113
Subgroup	Fabry Non Treated Classic Female .vs. Fabry Treated Classic Male	Proinflammatory	IL13	-0.181189	-1.01534	0.652957	5.51698e-17	-0.427632	0.669257	0.990207	-4.62123
Subgroup	Fabry Non Treated Classic Female .vs. Fabry Treated Classic Male	Chemokine	CXCL10	0.171219	-0.643219	0.985657	-2.7339e-16	0.41388	0.679287	0.990207	-4.62159
Subgroup	Fabry Non Treated Classic Female .vs. Fabry Treated Classic Male	Angiogenesis	VEGFD	0.156554	-0.589143	0.90225	-4.7955e-16	0.413316	0.6797	0.990207	-4.6216
Subgroup	Fabry Non Treated Classic Female .vs. Fabry Treated Classic Male	Cytokine	IL16	0.164949	-0.627568	0.957466	-1.96658e-16	0.409753	0.682309	0.990207	-4.62169
Subgroup	Fabry Non Treated Classic Female .vs. Fabry Treated Classic Male	Vascular_Injury	ICAM1	0.168741	-0.660511	0.997992	7.19539e-16	0.400602	0.689027	0.990207	-4.62192
Subgroup	Fabry Non Treated Classic Female .vs. Fabry Treated Classic Male	Vascular_Injury	CRP	0.167171	-0.692741	1.02708	4.17455e-16	0.382725	0.702222	0.990207	-4.62235
Subgroup	Fabry Non Treated Classic Female .vs. Fabry Treated Classic Male	Angiogenesis	FGF2	-0.110626	-0.704441	0.483189	-1.04703e-16	-0.366763	0.71408	0.990207	-4.62272
Subgroup	Fabry Non Treated Classic Female .vs. Fabry Treated Classic Male	Cytokine	VEGFA	0.105727	-0.556159	0.767612	-3.01939e-16	0.314472	0.753403	0.990207	-4.62382
Subgroup	Fabry Non Treated Classic Female .vs. Fabry Treated Classic Male	Angiogenesis	FLT1	0.122857	-0.707882	0.953595	8.86632e-16	0.291148	0.771159	0.990207	-4.62426
Subgroup	Fabry Non Treated Classic Female .vs. Fabry Treated Classic Male	Chemokine	CCL22	0.105716	-0.687236	0.898669	2.74249e-16	0.262467	0.793159	0.990207	-4.62475
Subgroup	Fabry Non Treated Classic Female .vs. Fabry Treated Classic Male	Proinflammatory	IL6	-0.111046	-0.957577	0.735485	6.72571e-17	-0.258249	0.79641	0.990207	-4.62481
Subgroup	Fabry Non Treated Classic Female .vs. Fabry Treated Classic Male	Vascular_Injury	SAA1	0.108955	-0.751293	0.969202	-6.15722e-17	0.249346	0.803281	0.990207	-4.62495
Subgroup	Fabry Non Treated Classic Female .vs. Fabry Treated Classic Male	Chemokine	CCL2	0.0969438	-0.742105	0.935993	9.81477e-17	0.227464	0.820233	0.990207	-4.62528
Subgroup	Fabry Non Treated Classic Female .vs. Fabry Treated Classic Male	Chemokine	CCL17	0.0656949	-0.667832	0.799222	-1.00753e-16	0.176318	0.860175	0.990207	-4.62591
Subgroup	Fabry Non Treated Classic Female .vs. Fabry Treated Classic Male	Cytokine	IL17A	0.0610385	-0.743433	0.86551	-8.10374e-17	0.149374	0.881369	0.990207	-4.62618
Subgroup	Fabry Non Treated Classic Female .vs. Fabry Treated Classic Male	Proinflammatory	IFNG	0.0571054	-0.732352	0.846562	-5.48354e-17	0.142406	0.886864	0.990207	-4.62625
Subgroup	Fabry Non Treated Classic Female .vs. Fabry Treated Classic Male	Proinflammatory	IL2	0.04852	-0.809398	0.906438	1.79185e-17	0.111341	0.911428	0.990207	-4.62649
Subgroup	Fabry Non Treated Classic Female .vs. Fabry Treated Classic Male	Proinflammatory	IL4	-0.0284141	-0.874994	0.818166	4.74018e-17	-0.0660763	0.947366	0.990207	-4.62674
Subgroup	Fabry Non Treated Classic Female .vs. Fabry Treated Classic Male	Cytokine	LTA	-0.0266504	-0.876736	0.823435	-4.4859e-17	-0.0617194	0.950832	0.990207	-4.62676
Subgroup	Fabry Non Treated Classic Female .vs. Fabry Treated Classic Male	Vascular_Injury	VCAM1	-0.0181804	-0.858463	0.822102	-2.33831e-16	-0.042595	0.966056	0.990207	-4.62682
Subgroup	Fabry Non Treated Classic Female .vs. Fabry Treated Classic Male	Proinflammatory	IL1B	-0.00397916	-0.825345	0.817387	-5.53509e-17	-0.00953752	0.992397	0.992397	-4.62687
Subgroup	Fabry Non Treated Classic Female .vs. Fabry Treated Non Classic Female	Vascular_Injury	ICAM1	-0.69981	-1.69096	0.291335	7.19539e-16	-1.39003	0.165654	0.96436	-4.5753
Subgroup	Fabry Non Treated Classic Female .vs. Fabry Treated Non Classic Female	Cytokine	IL12A	0.678576	-0.29967	1.65682	-4.08231e-16	1.36562	0.173183	0.96436	-4.57676
Subgroup	Fabry Non Treated Classic Female .vs. Fabry Treated Non Classic Female	Vascular_Injury	CRP	-0.60352	-1.63131	0.42427	4.17455e-16	-1.15603	0.248683	0.96436	-4.58827
Subgroup	Fabry Non Treated Classic Female .vs. Fabry Treated Non Classic Female	Chemokine	CCL26	-0.458437	-1.38152	0.464651	-1.51081e-16	-0.977725	0.329077	0.96436	-4.59658
Subgroup	Fabry Non Treated Classic Female .vs. Fabry Treated Non Classic Female	Proinflammatory	IL12B	-0.481601	-1.5117	0.548495	-7.01309e-17	-0.920428	0.358163	0.96436	-4.59896
Subgroup	Fabry Non Treated Classic Female .vs. Fabry Treated Non Classic Female	Chemokine	CXCL8	0.408241	-0.531332	1.34782	-1.07009e-17	0.855395	0.393084	0.96436	-4.60149
Subgroup	Fabry Non Treated Classic Female .vs. Fabry Treated Non Classic Female	Proinflammatory	IFNG	-0.406039	-1.34962	0.537542	-5.48354e-17	-0.847167	0.397645	0.96436	-4.60179
Subgroup	Fabry Non Treated Classic Female .vs. Fabry Treated Non Classic Female	Chemokine	CCL13	0.316858	-0.540832	1.17455	2.176e-16	0.727302	0.467665	0.96436	-4.60593
Subgroup	Fabry Non Treated Classic Female .vs. Fabry Treated Non Classic Female	Proinflammatory	IL6	-0.366454	-1.37825	0.645344	6.72571e-17	-0.713027	0.476439	0.96436	-4.60638
Subgroup	Fabry Non Treated Classic Female .vs. Fabry Treated Non Classic Female	Angiogenesis	FLT1	-0.317033	-1.30996	0.675889	8.86632e-16	-0.628593	0.530142	0.96436	-4.60887
Subgroup	Fabry Non Treated Classic Female .vs. Fabry Treated Non Classic Female	Cytokine	IL5	0.2934	-0.636908	1.22371	-5.61382e-17	0.620889	0.535191	0.96436	-4.60908
Subgroup	Fabry Non Treated Classic Female .vs. Fabry Treated Non Classic Female	Proinflammatory	IL4	-0.305754	-1.31761	0.706103	4.74018e-17	-0.594885	0.552414	0.96436	-4.60977
Subgroup	Fabry Non Treated Classic Female .vs. Fabry Treated Non Classic Female	Cytokine	VEGFA	0.229566	-0.561539	1.02067	-3.01939e-16	0.571286	0.568276	0.96436	-4.61038
Subgroup	Fabry Non Treated Classic Female .vs. Fabry Treated Non Classic Female	Cytokine	IL7	0.190556	-0.510636	0.891747	5.35605e-17	0.535015	0.593076	0.96436	-4.61126
Subgroup	Fabry Non Treated Classic Female .vs. Fabry Treated Non Classic Female	Chemokine	CCL3	0.242923	-0.715125	1.20097	-1.52535e-16	0.499186	0.618051	0.96436	-4.61207
Subgroup	Fabry Non Treated Classic Female .vs. Fabry Treated Non Classic Female	Cytokine	IL1A	0.179806	-0.653716	1.01333	-6.50974e-17	0.424686	0.6714	0.96436	-4.61359
Subgroup	Fabry Non Treated Classic Female .vs. Fabry Treated Non Classic Female	Chemokine	CCL4	0.185336	-0.70613	1.0768	1.92519e-16	0.409294	0.682645	0.96436	-4.61387
Subgroup	Fabry Non Treated Classic Female .vs. Fabry Treated Non Classic Female	Angiogenesis	TEK	0.187214	-0.79382	1.16825	-1.07048e-15	0.375693	0.707437	0.96436	-4.61445
Subgroup	Fabry Non Treated Classic Female .vs. Fabry Treated Non Classic Female	Cytokine	IL15	0.175287	-0.812104	1.16268	1.55164e-16	0.349494	0.726988	0.96436	-4.61487
Subgroup	Fabry Non Treated Classic Female .vs. Fabry Treated Non Classic Female	Vascular_Injury	VCAM1	-0.175447	-1.17978	0.828883	-2.33831e-16	-0.343914	0.731176	0.96436	-4.61495
Subgroup	Fabry Non Treated Classic Female .vs. Fabry Treated Non Classic Female	Chemokine	CCL11	0.162372	-0.781507	1.10625	-1.9415e-16	0.338669	0.73512	0.96436	-4.61503
Subgroup	Fabry Non Treated Classic Female .vs. Fabry Treated Non Classic Female	Proinflammatory	CXCL8	0.163519	-0.797406	1.12444	-8.03825e-17	0.335011	0.737874	0.96436	-4.61509
Subgroup	Fabry Non Treated Classic Female .vs. Fabry Treated Non Classic Female	Vascular_Injury	SAA1	0.166179	-0.862014	1.19437	-6.15722e-17	0.318187	0.750587	0.96436	-4.61533
Subgroup	Fabry Non Treated Classic Female .vs. Fabry Treated Non Classic Female	Angiogenesis	FGF2	-0.111796	-0.821541	0.597948	-1.04703e-16	-0.310103	0.75672	0.96436	-4.61544
Subgroup	Fabry Non Treated Classic Female .vs. Fabry Treated Non Classic Female	Angiogenesis	PGF	0.140736	-0.761833	1.04331	-4.4101e-16	0.306977	0.759095	0.96436	-4.61548
Subgroup	Fabry Non Treated Classic Female .vs. Fabry Treated Non Classic Female	Chemokine	CCL17	-0.118787	-0.995519	0.757945	-1.00753e-16	-0.266737	0.789874	0.96436	-4.61599
Subgroup	Fabry Non Treated Classic Female .vs. Fabry Treated Non Classic Female	Proinflammatory	IL13	0.130009	-0.866987	1.127	5.51698e-17	0.25672	0.797588	0.96436	-4.61611
Subgroup	Fabry Non Treated Classic Female .vs. Fabry Treated Non Classic Female	Proinflammatory	IL10	0.122413	-0.820922	1.06575	1.23542e-16	0.255472	0.798551	0.96436	-4.61612
Subgroup	Fabry Non Treated Classic Female .vs. Fabry Treated Non Classic Female	Cytokine	LTA	0.10085	-0.915197	1.1169	-4.4859e-17	0.195408	0.845219	0.96436	-4.61672
Subgroup	Fabry Non Treated Classic Female .vs. Fabry Treated Non Classic Female	Cytokine	IL17A	-0.0840379	-1.04557	0.877489	-8.10374e-17	-0.172065	0.863514	0.96436	-4.61691
Subgroup	Fabry Non Treated Classic Female .vs. Fabry Treated Non Classic Female	Chemokine	CCL2	0.0863558	-0.9165	1.08921	9.81477e-17	0.169525	0.865509	0.96436	-4.61692
Subgroup	Fabry Non Treated Classic Female .vs. Fabry Treated Non Classic Female	Proinflammatory	TNF	0.0789287	-0.864269	1.02213	-1.54599e-16	0.164745	0.869267	0.96436	-4.61696
Subgroup	Fabry Non Treated Classic Female .vs. Fabry Treated Non Classic Female	Angiogenesis	VEGFC	0.0550518	-0.6953	0.805403	7.61746e-17	0.14444	0.88526	0.96436	-4.6171
Subgroup	Fabry Non Treated Classic Female .vs. Fabry Treated Non Classic Female	Chemokine	CXCL10	-0.0692718	-1.04271	0.904167	-2.7339e-16	-0.140097	0.888687	0.96436	-4.61713
Subgroup	Fabry Non Treated Classic Female .vs. Fabry Treated Non Classic Female	Cytokine	CSF2	0.0610828	-0.896788	1.01895	4.12432e-17	0.125543	0.900186	0.96436	-4.61721
Subgroup	Fabry Non Treated Classic Female .vs. Fabry Treated Non Classic Female	Angiogenesis	VEGFD	0.0518071	-0.839471	0.943085	-4.7955e-16	0.114434	0.908978	0.96436	-4.61727
Subgroup	Fabry Non Treated Classic Female .vs. Fabry Treated Non Classic Female	Cytokine	IL16	0.0539044	-0.893334	1.00114	-1.96658e-16	0.112033	0.91088	0.96436	-4.61728
Subgroup	Fabry Non Treated Classic Female .vs. Fabry Treated Non Classic Female	Proinflammatory	IL1B	-0.04754	-1.02926	0.93418	-5.53509e-17	-0.0953349	0.924119	0.96436	-4.61736
Subgroup	Fabry Non Treated Classic Female .vs. Fabry Treated Non Classic Female	Proinflammatory	IL2	0.038691	-0.986718	1.0641	1.79185e-17	0.0742836	0.940839	0.96436	-4.61744
Subgroup	Fabry Non Treated Classic Female .vs. Fabry Treated Non Classic Female	Chemokine	CCL22	0.00109824	-0.946662	0.948858	2.74249e-16	0.00228129	0.998181	0.998181	-4.61756
Subgroup	Fabry Non Treated Classic Female .vs. Fabry Treated Non Classic Male	Chemokine	CXCL8	0.858707	0.123816	1.5936	-1.07009e-17	2.3004	0.022181	0.909423	-4.44937
Subgroup	Fabry Non Treated Classic Female .vs. Fabry Treated Non Classic Male	Angiogenesis	VEGFC	0.586409	-0.000481176	1.1733	7.61746e-17	1.96709	0.0501868	0.986169	-4.49761
Subgroup	Fabry Non Treated Classic Female .vs. Fabry Treated Non Classic Male	Proinflammatory	IFNG	-0.561688	-1.29971	0.176338	-5.48354e-17	-1.49832	0.135208	0.986169	-4.55329
Subgroup	Fabry Non Treated Classic Female .vs. Fabry Treated Non Classic Male	Proinflammatory	IL12B	-0.587863	-1.39356	0.217831	-7.01309e-17	-1.43644	0.152025	0.986169	-4.55955
Subgroup	Fabry Non Treated Classic Female .vs. Fabry Treated Non Classic Male	Cytokine	IL12A	0.465186	-0.299953	1.23033	-4.08231e-16	1.19692	0.232376	0.986169	-4.58137
Subgroup	Fabry Non Treated Classic Female .vs. Fabry Treated Non Classic Male	Chemokine	CCL3	0.450771	-0.298571	1.20011	-1.52535e-16	1.18429	0.237332	0.986169	-4.58241
Subgroup	Fabry Non Treated Classic Female .vs. Fabry Treated Non Classic Male	Proinflammatory	IL6	-0.367857	-1.15924	0.423525	6.72571e-17	-0.91511	0.360943	0.986169	-4.60205
Subgroup	Fabry Non Treated Classic Female .vs. Fabry Treated Non Classic Male	Cytokine	IL5	0.313458	-0.414186	1.0411	-5.61382e-17	0.848089	0.397133	0.986169	-4.60617
Subgroup	Fabry Non Treated Classic Female .vs. Fabry Treated Non Classic Male	Angiogenesis	PGF	0.285103	-0.420845	0.991051	-4.4101e-16	0.795077	0.427261	0.986169	-4.6092
Subgroup	Fabry Non Treated Classic Female .vs. Fabry Treated Non Classic Male	Cytokine	IL17A	0.273722	-0.47834	1.02578	-8.10374e-17	0.716534	0.474275	0.986169	-4.61334
Subgroup	Fabry Non Treated Classic Female .vs. Fabry Treated Non Classic Male	Chemokine	CCL13	0.242463	-0.428383	0.913309	2.176e-16	0.711546	0.477354	0.986169	-4.61359
Subgroup	Fabry Non Treated Classic Female .vs. Fabry Treated Non Classic Male	Vascular_Injury	ICAM1	-0.251665	-1.02689	0.523563	7.19539e-16	-0.639107	0.52329	0.986169	-4.61701
Subgroup	Fabry Non Treated Classic Female .vs. Fabry Treated Non Classic Male	Proinflammatory	IL4	-0.226082	-1.01751	0.565346	4.74018e-17	-0.562386	0.574315	0.986169	-4.62023
Subgroup	Fabry Non Treated Classic Female .vs. Fabry Treated Non Classic Male	Cytokine	IL16	0.20152	-0.539366	0.942407	-1.96658e-16	0.535485	0.592751	0.986169	-4.62126
Subgroup	Fabry Non Treated Classic Female .vs. Fabry Treated Non Classic Male	Proinflammatory	IL2	-0.211558	-1.01359	0.590469	1.79185e-17	-0.519304	0.60397	0.986169	-4.62186
Subgroup	Fabry Non Treated Classic Female .vs. Fabry Treated Non Classic Male	Cytokine	IL1A	-0.153871	-0.805814	0.498071	-6.50974e-17	-0.464653	0.642551	0.986169	-4.62374
Subgroup	Fabry Non Treated Classic Female .vs. Fabry Treated Non Classic Male	Chemokine	CCL26	-0.170397	-0.892393	0.551599	-1.51081e-16	-0.46463	0.642567	0.986169	-4.62374
Subgroup	Fabry Non Treated Classic Female .vs. Fabry Treated Non Classic Male	Cytokine	IL7	0.128864	-0.419576	0.677304	5.35605e-17	0.462576	0.644037	0.986169	-4.6238
Subgroup	Fabry Non Treated Classic Female .vs. Fabry Treated Non Classic Male	Angiogenesis	FGF2	-0.130025	-0.685154	0.425104	-1.04703e-16	-0.461119	0.645081	0.986169	-4.62385
Subgroup	Fabry Non Treated Classic Female .vs. Fabry Treated Non Classic Male	Chemokine	CCL11	0.167105	-0.571153	0.905363	-1.9415e-16	0.445617	0.656228	0.986169	-4.62434
Subgroup	Fabry Non Treated Classic Female .vs. Fabry Treated Non Classic Male	Cytokine	VEGFA	0.119736	-0.49903	0.738501	-3.01939e-16	0.380958	0.703531	0.986169	-4.62621
Subgroup	Fabry Non Treated Classic Female .vs. Fabry Treated Non Classic Male	Proinflammatory	IL10	-0.128315	-0.866148	0.609518	1.23542e-16	-0.342373	0.732334	0.986169	-4.62719
Subgroup	Fabry Non Treated Classic Female .vs. Fabry Treated Non Classic Male	Proinflammatory	TNF	0.125121	-0.612605	0.862847	-1.54599e-16	0.3339	0.738712	0.986169	-4.62739
Subgroup	Fabry Non Treated Classic Female .vs. Fabry Treated Non Classic Male	Proinflammatory	IL13	-0.124976	-0.90478	0.654828	5.51698e-17	-0.315517	0.752611	0.986169	-4.62781
Subgroup	Fabry Non Treated Classic Female .vs. Fabry Treated Non Classic Male	Proinflammatory	CXCL8	0.10236	-0.649232	0.853952	-8.03825e-17	0.268119	0.78881	0.986169	-4.62877
Subgroup	Fabry Non Treated Classic Female .vs. Fabry Treated Non Classic Male	Chemokine	CCL2	0.103908	-0.680479	0.888295	9.81477e-17	0.260795	0.794448	0.986169	-4.62891
Subgroup	Fabry Non Treated Classic Female .vs. Fabry Treated Non Classic Male	Angiogenesis	FLT1	-0.0967272	-0.873345	0.679891	8.86632e-16	-0.2452	0.806486	0.986169	-4.62919
Subgroup	Fabry Non Treated Classic Female .vs. Fabry Treated Non Classic Male	Chemokine	CCL4	0.0709009	-0.626363	0.768164	1.92519e-16	0.200187	0.841484	0.986169	-4.62989
Subgroup	Fabry Non Treated Classic Female .vs. Fabry Treated Non Classic Male	Vascular_Injury	SAA1	-0.07667	-0.880875	0.727535	-6.15722e-17	-0.187689	0.85126	0.986169	-4.63006
Subgroup	Fabry Non Treated Classic Female .vs. Fabry Treated Non Classic Male	Angiogenesis	TEK	0.0637502	-0.703569	0.83107	-1.07048e-15	0.163563	0.870196	0.986169	-4.63036
Subgroup	Fabry Non Treated Classic Female .vs. Fabry Treated Non Classic Male	Vascular_Injury	CRP	-0.0559221	-0.859812	0.747968	4.17455e-16	-0.136952	0.89117	0.986169	-4.63064
Subgroup	Fabry Non Treated Classic Female .vs. Fabry Treated Non Classic Male	Proinflammatory	IL1B	-0.0530483	-0.820904	0.714808	-5.53509e-17	-0.13601	0.891913	0.986169	-4.63064
Subgroup	Fabry Non Treated Classic Female .vs. Fabry Treated Non Classic Male	Cytokine	CSF2	-0.0507576	-0.79996	0.698445	4.12432e-17	-0.133377	0.893993	0.986169	-4.63067
Subgroup	Fabry Non Treated Classic Female .vs. Fabry Treated Non Classic Male	Vascular_Injury	VCAM1	-0.0463667	-0.831907	0.739174	-2.33831e-16	-0.116203	0.907577	0.986169	-4.63082
Subgroup	Fabry Non Treated Classic Female .vs. Fabry Treated Non Classic Male	Cytokine	IL15	0.043901	-0.728391	0.816193	1.55164e-16	0.111911	0.910976	0.986169	-4.63085
Subgroup	Fabry Non Treated Classic Female .vs. Fabry Treated Non Classic Male	Angiogenesis	VEGFD	-0.0352194	-0.732336	0.661897	-4.7955e-16	-0.0994619	0.920845	0.986169	-4.63095
Subgroup	Fabry Non Treated Classic Female .vs. Fabry Treated Non Classic Male	Chemokine	CCL22	0.0346608	-0.706633	0.775955	2.74249e-16	0.092051	0.926725	0.986169	-4.631
Subgroup	Fabry Non Treated Classic Female .vs. Fabry Treated Non Classic Male	Chemokine	CCL17	0.0189743	-0.666765	0.704714	-1.00753e-16	0.0544737	0.956598	0.986169	-4.63119
Subgroup	Fabry Non Treated Classic Female .vs. Fabry Treated Non Classic Male	Cytokine	LTA	0.0108572	-0.783848	0.805562	-4.4859e-17	0.0268964	0.978562	0.986169	-4.63127
Subgroup	Fabry Non Treated Classic Female .vs. Fabry Treated Non Classic Male	Chemokine	CXCL10	-0.00671049	-0.76809	0.754669	-2.7339e-16	-0.0173514	0.986169	0.986169	-4.63128
Subgroup	Fabry Non Treated Classic Male .vs. Fabry Non Treated Non Classic Female	Chemokine	CCL26	-1.81831	-3.18747	-0.449148	-1.51081e-16	-2.61453	0.00943208	0.386715	-2.92866
Subgroup	Fabry Non Treated Classic Male .vs. Fabry Non Treated Non Classic Female	Cytokine	IL5	-1.49549	-2.87536	-0.115617	-5.61382e-17	-2.13366	0.0337635	0.692151	-3.65215
Subgroup	Fabry Non Treated Classic Male .vs. Fabry Non Treated Non Classic Female	Proinflammatory	IFNG	1.01429	-0.385265	2.41385	-5.48354e-17	1.42677	0.154791	0.997903	-4.45907
Subgroup	Fabry Non Treated Classic Male .vs. Fabry Non Treated Non Classic Female	Cytokine	CSF2	-0.955966	-2.37672	0.464786	4.12432e-17	-1.32466	0.186393	0.997903	-4.54976
Subgroup	Fabry Non Treated Classic Male .vs. Fabry Non Treated Non Classic Female	Cytokine	IL15	-0.967878	-2.43242	0.49666	1.55164e-16	-1.30107	0.194333	0.997903	-4.56977
Subgroup	Fabry Non Treated Classic Male .vs. Fabry Non Treated Non Classic Female	Proinflammatory	IL6	0.687304	-0.813435	2.18804	6.72571e-17	0.901622	0.368054	0.997903	-4.8547
Subgroup	Fabry Non Treated Classic Male .vs. Fabry Non Treated Non Classic Female	Cytokine	LTA	-0.661724	-2.16876	0.845317	-4.4859e-17	-0.864435	0.388109	0.997903	-4.87602
Subgroup	Fabry Non Treated Classic Male .vs. Fabry Non Treated Non Classic Female	Proinflammatory	IL4	-0.525137	-2.02596	0.975689	4.74018e-17	-0.688847	0.491505	0.997903	-4.96463
Subgroup	Fabry Non Treated Classic Male .vs. Fabry Non Treated Non Classic Female	Proinflammatory	IL12B	-0.527128	-2.05501	1.00075	-7.01309e-17	-0.679214	0.497578	0.997903	-4.96891
Subgroup	Fabry Non Treated Classic Male .vs. Fabry Non Treated Non Classic Female	Chemokine	CCL22	-0.471442	-1.8772	0.934313	2.74249e-16	-0.660236	0.50966	0.997903	-4.97717
Subgroup	Fabry Non Treated Classic Male .vs. Fabry Non Treated Non Classic Female	Angiogenesis	TEK	-0.448887	-1.904	1.00622	-1.07048e-15	-0.607326	0.54414	0.997903	-4.99899
Subgroup	Fabry Non Treated Classic Male .vs. Fabry Non Treated Non Classic Female	Proinflammatory	IL10	0.423905	-0.975287	1.8231	1.23542e-16	0.596447	0.551372	0.997903	-5.00325
Subgroup	Fabry Non Treated Classic Male .vs. Fabry Non Treated Non Classic Female	Chemokine	CXCL8	0.399208	-0.994405	1.79282	-1.07009e-17	0.563946	0.573255	0.997903	-5.01551
Subgroup	Fabry Non Treated Classic Male .vs. Fabry Non Treated Non Classic Female	Vascular_Injury	SAA1	-0.419611	-1.94467	1.10544	-6.15722e-17	-0.541678	0.588483	0.997903	-5.02352
Subgroup	Fabry Non Treated Classic Male .vs. Fabry Non Treated Non Classic Female	Angiogenesis	VEGFC	0.292974	-0.819978	1.40593	7.61746e-17	0.518243	0.604709	0.997903	-5.03161
Subgroup	Fabry Non Treated Classic Male .vs. Fabry Non Treated Non Classic Female	Angiogenesis	FGF2	0.260725	-0.791996	1.31345	-1.04703e-16	0.487585	0.626236	0.997903	-5.04164
Subgroup	Fabry Non Treated Classic Male .vs. Fabry Non Treated Non Classic Female	Chemokine	CCL4	-0.304217	-1.62647	1.01804	1.92519e-16	-0.452947	0.650947	0.997903	-5.05225
Subgroup	Fabry Non Treated Classic Male .vs. Fabry Non Treated Non Classic Female	Cytokine	IL16	-0.314416	-1.7194	1.09057	-1.96658e-16	-0.440569	0.659874	0.997903	-5.05585
Subgroup	Fabry Non Treated Classic Male .vs. Fabry Non Treated Non Classic Female	Chemokine	CCL3	0.312512	-1.1085	1.73353	-1.52535e-16	0.432961	0.665386	0.997903	-5.05801
Subgroup	Fabry Non Treated Classic Male .vs. Fabry Non Treated Non Classic Female	Cytokine	IL7	-0.22222	-1.26226	0.817815	5.35605e-17	-0.420645	0.674345	0.997903	-5.06143
Subgroup	Fabry Non Treated Classic Male .vs. Fabry Non Treated Non Classic Female	Proinflammatory	CXCL8	0.284528	-1.14075	1.70981	-8.03825e-17	0.393011	0.694619	0.997903	-5.06875
Subgroup	Fabry Non Treated Classic Male .vs. Fabry Non Treated Non Classic Female	Cytokine	VEGFA	-0.226255	-1.39965	0.947142	-3.01939e-16	-0.379607	0.704533	0.997903	-5.07213
Subgroup	Fabry Non Treated Classic Male .vs. Fabry Non Treated Non Classic Female	Cytokine	IL12A	0.276739	-1.17423	1.72771	-4.08231e-16	0.375484	0.707593	0.997903	-5.07314
Subgroup	Fabry Non Treated Classic Male .vs. Fabry Non Treated Non Classic Female	Cytokine	IL17A	-0.249386	-1.67556	1.17679	-8.10374e-17	-0.344254	0.730921	0.997903	-5.08046
Subgroup	Fabry Non Treated Classic Male .vs. Fabry Non Treated Non Classic Female	Proinflammatory	IL13	-0.200952	-1.67974	1.27783	5.51698e-17	-0.267527	0.789266	0.997903	-5.09575
Subgroup	Fabry Non Treated Classic Male .vs. Fabry Non Treated Non Classic Female	Proinflammatory	IL1B	0.195992	-1.26013	1.65212	-5.53509e-17	0.264984	0.791222	0.997903	-5.09619
Subgroup	Fabry Non Treated Classic Male .vs. Fabry Non Treated Non Classic Female	Proinflammatory	TNF	0.185753	-1.21324	1.58474	-1.54599e-16	0.261398	0.793983	0.997903	-5.0968
Subgroup	Fabry Non Treated Classic Male .vs. Fabry Non Treated Non Classic Female	Chemokine	CCL2	0.174761	-1.31271	1.66224	9.81477e-17	0.231299	0.817256	0.997903	-5.10163
Subgroup	Fabry Non Treated Classic Male .vs. Fabry Non Treated Non Classic Female	Cytokine	IL1A	-0.130464	-1.36678	1.10585	-6.50974e-17	-0.20775	0.835579	0.997903	-5.105
Subgroup	Fabry Non Treated Classic Male .vs. Fabry Non Treated Non Classic Female	Chemokine	CCL13	-0.110303	-1.38246	1.16186	2.176e-16	-0.170698	0.864588	0.997903	-5.10957
Subgroup	Fabry Non Treated Classic Male .vs. Fabry Non Treated Non Classic Female	Vascular_Injury	ICAM1	0.123565	-1.34654	1.59367	7.19539e-16	0.165474	0.868694	0.997903	-5.11014
Subgroup	Fabry Non Treated Classic Male .vs. Fabry Non Treated Non Classic Female	Vascular_Injury	CRP	-0.106614	-1.63107	1.41785	4.17455e-16	-0.137682	0.890593	0.997903	-5.11289
Subgroup	Fabry Non Treated Classic Male .vs. Fabry Non Treated Non Classic Female	Proinflammatory	IL2	-0.0866585	-1.60759	1.43427	1.79185e-17	-0.112172	0.91077	0.997903	-5.11496
Subgroup	Fabry Non Treated Classic Male .vs. Fabry Non Treated Non Classic Female	Angiogenesis	FLT1	-0.083282	-1.55602	1.38946	8.86632e-16	-0.111328	0.911438	0.997903	-5.11503
Subgroup	Fabry Non Treated Classic Male .vs. Fabry Non Treated Non Classic Female	Chemokine	CCL17	-0.0665483	-1.36695	1.23386	-1.00753e-16	-0.100749	0.919824	0.997903	-5.11576
Subgroup	Fabry Non Treated Classic Male .vs. Fabry Non Treated Non Classic Female	Angiogenesis	VEGFD	0.0673508	-1.25463	1.38933	-4.7955e-16	0.100299	0.92018	0.997903	-5.11579
Subgroup	Fabry Non Treated Classic Male .vs. Fabry Non Treated Non Classic Female	Vascular_Injury	VCAM1	-0.0432571	-1.53292	1.4464	-2.33831e-16	-0.0571677	0.954454	0.997903	-5.118
Subgroup	Fabry Non Treated Classic Male .vs. Fabry Non Treated Non Classic Female	Angiogenesis	PGF	-0.0263376	-1.36506	1.31239	-4.4101e-16	-0.0387315	0.969133	0.997903	-5.11858
Subgroup	Fabry Non Treated Classic Male .vs. Fabry Non Treated Non Classic Female	Chemokine	CCL11	0.00813672	-1.39186	1.40814	-1.9415e-16	0.011442	0.990879	0.997903	-5.11902
Subgroup	Fabry Non Treated Classic Male .vs. Fabry Non Treated Non Classic Female	Chemokine	CXCL10	-0.00192974	-1.44577	1.44191	-2.7339e-16	-0.00263123	0.997903	0.997903	-5.11906
Subgroup	Fabry Non Treated Classic Male .vs. Fabry Non Treated Non Classic Male	Proinflammatory	IFNG	-1.36375	-2.99808	0.27058	-5.48354e-17	-1.64276	0.101584	0.962743	-4.5825
Subgroup	Fabry Non Treated Classic Male .vs. Fabry Non Treated Non Classic Male	Chemokine	CCL26	-1.18434	-2.78318	0.414491	-1.51081e-16	-1.45833	0.145902	0.962743	-4.58675
Subgroup	Fabry Non Treated Classic Male .vs. Fabry Non Treated Non Classic Male	Cytokine	IL15	-1.09139	-2.8016	0.618818	1.55164e-16	-1.25635	0.210063	0.962743	-4.59084
Subgroup	Fabry Non Treated Classic Male .vs. Fabry Non Treated Non Classic Male	Cytokine	IL5	-0.897227	-2.50857	0.714113	-5.61382e-17	-1.09621	0.273952	0.962743	-4.59366
Subgroup	Fabry Non Treated Classic Male .vs. Fabry Non Treated Non Classic Male	Proinflammatory	IL6	0.973292	-0.779194	2.72578	6.72571e-17	1.09337	0.275195	0.962743	-4.59371
Subgroup	Fabry Non Treated Classic Male .vs. Fabry Non Treated Non Classic Male	Cytokine	IL17A	-0.853627	-2.51904	0.811787	-8.10374e-17	-1.00908	0.31383	0.962743	-4.59504
Subgroup	Fabry Non Treated Classic Male .vs. Fabry Non Treated Non Classic Male	Cytokine	CSF2	-0.844905	-2.50399	0.814176	4.12432e-17	-1.00258	0.316951	0.962743	-4.59514
Subgroup	Fabry Non Treated Classic Male .vs. Fabry Non Treated Non Classic Male	Proinflammatory	IL4	-0.855822	-2.60841	0.896765	4.74018e-17	-0.961356	0.337225	0.962743	-4.59575
Subgroup	Fabry Non Treated Classic Male .vs. Fabry Non Treated Non Classic Male	Cytokine	LTA	-0.855214	-2.61506	0.904631	-4.4859e-17	-0.956711	0.339561	0.962743	-4.59581
Subgroup	Fabry Non Treated Classic Male .vs. Fabry Non Treated Non Classic Male	Cytokine	VEGFA	-0.661941	-2.03217	0.708293	-3.01939e-16	-0.951054	0.34242	0.962743	-4.59589
Subgroup	Fabry Non Treated Classic Male .vs. Fabry Non Treated Non Classic Male	Proinflammatory	IL12B	-0.692582	-2.47676	1.0916	-7.01309e-17	-0.76421	0.445403	0.962743	-4.5983
Subgroup	Fabry Non Treated Classic Male .vs. Fabry Non Treated Non Classic Male	Cytokine	IL1A	0.546459	-0.897243	1.99016	-6.50974e-17	0.745179	0.456806	0.962743	-4.59852
Subgroup	Fabry Non Treated Classic Male .vs. Fabry Non Treated Non Classic Male	Chemokine	CCL3	-0.526562	-2.18595	1.13283	-1.52535e-16	-0.624714	0.532681	0.962743	-4.59976
Subgroup	Fabry Non Treated Classic Male .vs. Fabry Non Treated Non Classic Male	Vascular_Injury	SAA1	-0.561419	-2.3423	1.21946	-6.15722e-17	-0.62063	0.535362	0.962743	-4.5998
Subgroup	Fabry Non Treated Classic Male .vs. Fabry Non Treated Non Classic Male	Angiogenesis	TEK	-0.458203	-2.1574	1.241	-1.07048e-15	-0.530876	0.595937	0.962743	-4.60058
Subgroup	Fabry Non Treated Classic Male .vs. Fabry Non Treated Non Classic Male	Cytokine	IL16	-0.439251	-2.07992	1.20142	-1.96658e-16	-0.527075	0.59857	0.962743	-4.60061
Subgroup	Fabry Non Treated Classic Male .vs. Fabry Non Treated Non Classic Male	Proinflammatory	TNF	-0.410931	-2.0446	1.22274	-1.54599e-16	-0.495206	0.620854	0.962743	-4.60086
Subgroup	Fabry Non Treated Classic Male .vs. Fabry Non Treated Non Classic Male	Angiogenesis	PGF	-0.389896	-1.95319	1.1734	-4.4101e-16	-0.491008	0.623816	0.962743	-4.60089
Subgroup	Fabry Non Treated Classic Male .vs. Fabry Non Treated Non Classic Male	Proinflammatory	IL13	-0.424041	-2.15089	1.30281	5.51698e-17	-0.48343	0.629178	0.962743	-4.60095
Subgroup	Fabry Non Treated Classic Male .vs. Fabry Non Treated Non Classic Male	Chemokine	CCL2	0.412062	-1.32493	2.14906	9.81477e-17	0.46703	0.640852	0.962743	-4.60106
Subgroup	Fabry Non Treated Classic Male .vs. Fabry Non Treated Non Classic Male	Chemokine	CXCL8	0.377267	-1.25012	2.00466	-1.07009e-17	0.456391	0.648472	0.962743	-4.60114
Subgroup	Fabry Non Treated Classic Male .vs. Fabry Non Treated Non Classic Male	Angiogenesis	VEGFD	0.35543	-1.18831	1.89917	-4.7955e-16	0.453273	0.650713	0.962743	-4.60116
Subgroup	Fabry Non Treated Classic Male .vs. Fabry Non Treated Non Classic Male	Chemokine	CCL22	-0.361712	-2.00328	1.27986	2.74249e-16	-0.433795	0.66478	0.962743	-4.60129
Subgroup	Fabry Non Treated Classic Male .vs. Fabry Non Treated Non Classic Male	Cytokine	IL7	-0.244486	-1.45899	0.970014	5.35605e-17	-0.396311	0.692186	0.962743	-4.60152
Subgroup	Fabry Non Treated Classic Male .vs. Fabry Non Treated Non Classic Male	Vascular_Injury	ICAM1	-0.332075	-2.04879	1.38464	7.19539e-16	-0.380819	0.703634	0.962743	-4.60162
Subgroup	Fabry Non Treated Classic Male .vs. Fabry Non Treated Non Classic Male	Angiogenesis	VEGFC	0.241588	-1.05806	1.54124	7.61746e-17	0.365957	0.714681	0.962743	-4.6017
Subgroup	Fabry Non Treated Classic Male .vs. Fabry Non Treated Non Classic Male	Proinflammatory	IL1B	0.308139	-1.39225	2.00853	-5.53509e-17	0.356762	0.721546	0.962743	-4.60175
Subgroup	Fabry Non Treated Classic Male .vs. Fabry Non Treated Non Classic Male	Angiogenesis	FGF2	0.174851	-1.05446	1.40416	-1.04703e-16	0.280017	0.779676	0.962743	-4.60212
Subgroup	Fabry Non Treated Classic Male .vs. Fabry Non Treated Non Classic Male	Vascular_Injury	VCAM1	-0.236666	-1.97622	1.50288	-2.33831e-16	-0.267842	0.789023	0.962743	-4.60217
Subgroup	Fabry Non Treated Classic Male .vs. Fabry Non Treated Non Classic Male	Chemokine	CXCL10	-0.223533	-1.90958	1.46251	-2.7339e-16	-0.261007	0.794284	0.962743	-4.6022
Subgroup	Fabry Non Treated Classic Male .vs. Fabry Non Treated Non Classic Male	Proinflammatory	CXCL8	0.220121	-1.44425	1.88449	-8.03825e-17	0.26037	0.794775	0.962743	-4.6022
Subgroup	Fabry Non Treated Classic Male .vs. Fabry Non Treated Non Classic Male	Proinflammatory	IL2	0.216588	-1.55947	1.99265	1.79185e-17	0.240081	0.810448	0.962743	-4.60228
Subgroup	Fabry Non Treated Classic Male .vs. Fabry Non Treated Non Classic Male	Cytokine	IL12A	-0.165324	-1.8597	1.52905	-4.08231e-16	-0.192091	0.847814	0.962743	-4.60243
Subgroup	Fabry Non Treated Classic Male .vs. Fabry Non Treated Non Classic Male	Chemokine	CCL4	-0.129378	-1.67344	1.41469	1.92519e-16	-0.164958	0.869099	0.962743	-4.60251
Subgroup	Fabry Non Treated Classic Male .vs. Fabry Non Treated Non Classic Male	Angiogenesis	FLT1	-0.105815	-1.82561	1.61398	8.86632e-16	-0.12113	0.903677	0.962743	-4.6026
Subgroup	Fabry Non Treated Classic Male .vs. Fabry Non Treated Non Classic Male	Chemokine	CCL13	0.0895991	-1.39596	1.57516	2.176e-16	0.118739	0.90557	0.962743	-4.6026
Subgroup	Fabry Non Treated Classic Male .vs. Fabry Non Treated Non Classic Male	Vascular_Injury	CRP	0.0842802	-1.69591	1.86447	4.17455e-16	0.0932053	0.925809	0.962743	-4.60265
Subgroup	Fabry Non Treated Classic Male .vs. Fabry Non Treated Non Classic Male	Chemokine	CCL11	-0.0658122	-1.70066	1.56903	-1.9415e-16	-0.079252	0.93689	0.962743	-4.60266
Subgroup	Fabry Non Treated Classic Male .vs. Fabry Non Treated Non Classic Male	Chemokine	CCL17	0.0588294	-1.45972	1.57737	-1.00753e-16	0.0762689	0.939261	0.962743	-4.60267
Subgroup	Fabry Non Treated Classic Male .vs. Fabry Non Treated Non Classic Male	Proinflammatory	IL10	0.0370149	-1.59689	1.67092	1.23542e-16	0.0445995	0.964459	0.964459	-4.6027
Subgroup	Fabry Non Treated Classic Male .vs. Fabry Treated Classic Female	Chemokine	CCL26	-1.0413	-2.38764	0.305042	-1.51081e-16	-1.52265	0.129005	0.983937	-4.58143
Subgroup	Fabry Non Treated Classic Male .vs. Fabry Treated Classic Female	Angiogenesis	VEGFC	0.597812	-0.496589	1.69221	7.61746e-17	1.0754	0.283148	0.983937	-4.59359
Subgroup	Fabry Non Treated Classic Male .vs. Fabry Treated Classic Female	Cytokine	IL17A	-0.732817	-2.13522	0.669587	-8.10374e-17	-1.02873	0.304517	0.983937	-4.59462
Subgroup	Fabry Non Treated Classic Male .vs. Fabry Treated Classic Female	Cytokine	IL5	-0.656827	-2.0137	0.700043	-5.61382e-17	-0.953	0.341434	0.983937	-4.5962
Subgroup	Fabry Non Treated Classic Male .vs. Fabry Treated Classic Female	Proinflammatory	IL13	-0.68852	-2.14266	0.765616	5.51698e-17	-0.932163	0.352077	0.983937	-4.59661
Subgroup	Fabry Non Treated Classic Male .vs. Fabry Treated Classic Female	Angiogenesis	VEGFD	0.602487	-0.697457	1.90243	-4.7955e-16	0.912438	0.362344	0.983937	-4.597
Subgroup	Fabry Non Treated Classic Male .vs. Fabry Treated Classic Female	Proinflammatory	IL6	0.575582	-0.900143	2.05131	6.72571e-17	0.76786	0.443235	0.983937	-4.59956
Subgroup	Fabry Non Treated Classic Male .vs. Fabry Treated Classic Female	Chemokine	CCL2	0.503673	-0.95901	1.96635	9.81477e-17	0.67792	0.498397	0.983937	-4.60093
Subgroup	Fabry Non Treated Classic Male .vs. Fabry Treated Classic Female	Proinflammatory	IL12B	-0.503978	-2.00639	0.998436	-7.01309e-17	-0.660393	0.509559	0.983937	-4.60118
Subgroup	Fabry Non Treated Classic Male .vs. Fabry Treated Classic Female	Cytokine	IL15	-0.476863	-1.91699	0.963264	1.55164e-16	-0.651889	0.515022	0.983937	-4.6013
Subgroup	Fabry Non Treated Classic Male .vs. Fabry Treated Classic Female	Proinflammatory	IL4	-0.48754	-1.96335	0.98827	4.74018e-17	-0.65037	0.516001	0.983937	-4.60132
Subgroup	Fabry Non Treated Classic Male .vs. Fabry Treated Classic Female	Cytokine	LTA	-0.47599	-1.95791	1.00593	-4.4859e-17	-0.632343	0.527693	0.983937	-4.60156
Subgroup	Fabry Non Treated Classic Male .vs. Fabry Treated Classic Female	Proinflammatory	CXCL8	0.399259	-1.00227	1.80079	-8.03825e-17	0.560834	0.575372	0.983937	-4.60246
Subgroup	Fabry Non Treated Classic Male .vs. Fabry Treated Classic Female	Cytokine	VEGFA	-0.327416	-1.48126	0.826424	-3.01939e-16	-0.558644	0.576863	0.983937	-4.60249
Subgroup	Fabry Non Treated Classic Male .vs. Fabry Treated Classic Female	Cytokine	CSF2	-0.351696	-1.74877	1.04538	4.12432e-17	-0.495597	0.620578	0.983937	-4.60319
Subgroup	Fabry Non Treated Classic Male .vs. Fabry Treated Classic Female	Vascular_Injury	CRP	-0.308678	-1.80773	1.19037	4.17455e-16	-0.405387	0.685511	0.983937	-4.60405
Subgroup	Fabry Non Treated Classic Male .vs. Fabry Treated Classic Female	Angiogenesis	TEK	-0.291735	-1.72259	1.13912	-1.07048e-15	-0.401396	0.688443	0.983937	-4.60409
Subgroup	Fabry Non Treated Classic Male .vs. Fabry Treated Classic Female	Angiogenesis	FGF2	0.210905	-0.82427	1.24608	-1.04703e-16	0.4011	0.688661	0.983937	-4.60409
Subgroup	Fabry Non Treated Classic Male .vs. Fabry Treated Classic Female	Proinflammatory	IFNG	0.234131	-1.1421	1.61036	-5.48354e-17	0.334925	0.737939	0.983937	-4.6046
Subgroup	Fabry Non Treated Classic Male .vs. Fabry Treated Classic Female	Vascular_Injury	SAA1	-0.234062	-1.7337	1.26557	-6.15722e-17	-0.307273	0.75887	0.983937	-4.60479
Subgroup	Fabry Non Treated Classic Male .vs. Fabry Treated Classic Female	Angiogenesis	PGF	0.195253	-1.12116	1.51167	-4.4101e-16	0.292002	0.770507	0.983937	-4.60489
Subgroup	Fabry Non Treated Classic Male .vs. Fabry Treated Classic Female	Proinflammatory	TNF	-0.191951	-1.56762	1.18372	-1.54599e-16	-0.274698	0.783757	0.983937	-4.60499
Subgroup	Fabry Non Treated Classic Male .vs. Fabry Treated Classic Female	Cytokine	IL16	-0.17749	-1.55905	1.20407	-1.96658e-16	-0.25292	0.800521	0.983937	-4.60512
Subgroup	Fabry Non Treated Classic Male .vs. Fabry Treated Classic Female	Proinflammatory	IL10	0.159838	-1.21603	1.53571	1.23542e-16	0.228709	0.819267	0.983937	-4.60524
Subgroup	Fabry Non Treated Classic Male .vs. Fabry Treated Classic Female	Chemokine	CCL4	-0.144149	-1.44437	1.15607	1.92519e-16	-0.21826	0.82739	0.983937	-4.60529
Subgroup	Fabry Non Treated Classic Male .vs. Fabry Treated Classic Female	Chemokine	CCL17	-0.140106	-1.41883	1.13862	-1.00753e-16	-0.215704	0.82938	0.983937	-4.6053
Subgroup	Fabry Non Treated Classic Male .vs. Fabry Treated Classic Female	Chemokine	CCL22	-0.149836	-1.53216	1.23249	2.74249e-16	-0.213396	0.831178	0.983937	-4.60531
Subgroup	Fabry Non Treated Classic Male .vs. Fabry Treated Classic Female	Chemokine	CXCL8	0.131427	-1.23896	1.50181	-1.07009e-17	0.188808	0.850384	0.983937	-4.60542
Subgroup	Fabry Non Treated Classic Male .vs. Fabry Treated Classic Female	Proinflammatory	IL1B	0.129924	-1.30193	1.56178	-5.53509e-17	0.178636	0.858356	0.983937	-4.60545
Subgroup	Fabry Non Treated Classic Male .vs. Fabry Treated Classic Female	Chemokine	CCL11	0.120063	-1.2566	1.49673	-1.9415e-16	0.171696	0.863804	0.983937	-4.60548
Subgroup	Fabry Non Treated Classic Male .vs. Fabry Treated Classic Female	Chemokine	CXCL10	-0.122624	-1.5424	1.29715	-2.7339e-16	-0.170033	0.86511	0.983937	-4.60549
Subgroup	Fabry Non Treated Classic Male .vs. Fabry Treated Classic Female	Proinflammatory	IL2	-0.10413	-1.59971	1.39145	1.79185e-17	-0.137072	0.891075	0.983937	-4.60559
Subgroup	Fabry Non Treated Classic Male .vs. Fabry Treated Classic Female	Vascular_Injury	VCAM1	-0.0993212	-1.56415	1.36551	-2.33831e-16	-0.133486	0.893908	0.983937	-4.6056
Subgroup	Fabry Non Treated Classic Male .vs. Fabry Treated Classic Female	Chemokine	CCL13	0.0621092	-1.18885	1.31307	2.176e-16	0.0977449	0.922207	0.983937	-4.60569
Subgroup	Fabry Non Treated Classic Male .vs. Fabry Treated Classic Female	Chemokine	CCL3	0.0682491	-1.32908	1.46558	-1.52535e-16	0.0961564	0.923467	0.983937	-4.6057
Subgroup	Fabry Non Treated Classic Male .vs. Fabry Treated Classic Female	Cytokine	IL12A	0.0685992	-1.35819	1.49539	-4.08231e-16	0.0946542	0.924659	0.983937	-4.6057
Subgroup	Fabry Non Treated Classic Male .vs. Fabry Treated Classic Female	Cytokine	IL1A	0.0472722	-1.16843	1.26298	-6.50974e-17	0.0765522	0.939036	0.983937	-4.60573
Subgroup	Fabry Non Treated Classic Male .vs. Fabry Treated Classic Female	Vascular_Injury	ICAM1	0.0320905	-1.41351	1.47769	7.19539e-16	0.0437027	0.965173	0.983937	-4.60577
Subgroup	Fabry Non Treated Classic Male .vs. Fabry Treated Classic Female	Angiogenesis	FLT1	-0.0164003	-1.4646	1.43179	8.86632e-16	-0.0222949	0.982229	0.983937	-4.60579
Subgroup	Fabry Non Treated Classic Male .vs. Fabry Treated Classic Female	Cytokine	IL7	-0.0104685	-1.03317	1.01223	5.35605e-17	-0.0201519	0.983937	0.983937	-4.60579
Subgroup	Fabry Non Treated Classic Male .vs. Fabry Treated Classic Male	Chemokine	CCL26	-1.22819	-2.56587	0.109486	-1.51081e-16	-1.80757	0.0717756	0.998085	-4.57127
Subgroup	Fabry Non Treated Classic Male .vs. Fabry Treated Classic Male	Proinflammatory	IFNG	0.732104	-0.635276	2.09948	-5.48354e-17	1.05406	0.29279	0.998085	-4.59405
Subgroup	Fabry Non Treated Classic Male .vs. Fabry Treated Classic Male	Cytokine	CSF2	-0.643766	-2.03185	0.744321	4.12432e-17	-0.913043	0.362026	0.998085	-4.59701
Subgroup	Fabry Non Treated Classic Male .vs. Fabry Treated Classic Male	Proinflammatory	IL6	0.656659	-0.809575	2.12289	6.72571e-17	0.881692	0.37872	0.998085	-4.59761
Subgroup	Fabry Non Treated Classic Male .vs. Fabry Treated Classic Male	Proinflammatory	IL10	0.584513	-0.782509	1.95154	1.23542e-16	0.841781	0.400648	0.998085	-4.59834
Subgroup	Fabry Non Treated Classic Male .vs. Fabry Treated Classic Male	Chemokine	CXCL8	0.582001	-0.779571	1.94357	-1.07009e-17	0.841518	0.400795	0.998085	-4.59835
Subgroup	Fabry Non Treated Classic Male .vs. Fabry Treated Classic Male	Angiogenesis	VEGFD	0.487323	-0.804262	1.77891	-4.7955e-16	0.742804	0.45824	0.998085	-4.60002
Subgroup	Fabry Non Treated Classic Male .vs. Fabry Treated Classic Male	Cytokine	IL1A	-0.454259	-1.66215	0.753629	-6.50974e-17	-0.740384	0.459704	0.998085	-4.60006
Subgroup	Fabry Non Treated Classic Male .vs. Fabry Treated Classic Male	Proinflammatory	CXCL8	0.449743	-0.942771	1.84226	-8.03825e-17	0.635836	0.525417	0.998085	-4.6016
Subgroup	Fabry Non Treated Classic Male .vs. Fabry Treated Classic Male	Chemokine	CCL2	0.464269	-0.989007	1.91754	9.81477e-17	0.62893	0.529922	0.998085	-4.60169
Subgroup	Fabry Non Treated Classic Male .vs. Fabry Treated Classic Male	Vascular_Injury	ICAM1	0.420807	-1.0155	1.85711	7.19539e-16	0.576788	0.564559	0.998085	-4.60236
Subgroup	Fabry Non Treated Classic Male .vs. Fabry Treated Classic Male	Cytokine	IL17A	-0.388061	-1.78145	1.00532	-8.10374e-17	-0.548288	0.583943	0.998085	-4.60271
Subgroup	Fabry Non Treated Classic Male .vs. Fabry Treated Classic Male	Proinflammatory	IL12B	-0.401972	-1.89472	1.09078	-7.01309e-17	-0.530138	0.596448	0.998085	-4.60292
Subgroup	Fabry Non Treated Classic Male .vs. Fabry Treated Classic Male	Angiogenesis	VEGFC	0.291874	-0.795489	1.37924	7.61746e-17	0.528447	0.597619	0.998085	-4.60294
Subgroup	Fabry Non Treated Classic Male .vs. Fabry Treated Classic Male	Vascular_Injury	SAA1	-0.390873	-1.88087	1.09912	-6.15722e-17	-0.516455	0.605955	0.998085	-4.60307
Subgroup	Fabry Non Treated Classic Male .vs. Fabry Treated Classic Male	Cytokine	LTA	-0.357173	-1.82956	1.11522	-4.4859e-17	-0.477569	0.63334	0.998085	-4.60348
Subgroup	Fabry Non Treated Classic Male .vs. Fabry Treated Classic Male	Angiogenesis	FGF2	0.244988	-0.783529	1.27351	-1.04703e-16	0.468937	0.63949	0.998085	-4.60357
Subgroup	Fabry Non Treated Classic Male .vs. Fabry Treated Classic Male	Cytokine	IL12A	0.315283	-1.10233	1.7329	-4.08231e-16	0.437848	0.661843	0.998085	-4.60387
Subgroup	Fabry Non Treated Classic Male .vs. Fabry Treated Classic Male	Proinflammatory	IL13	-0.311198	-1.75598	1.13359	5.51698e-17	-0.424047	0.671866	0.998085	-4.604
Subgroup	Fabry Non Treated Classic Male .vs. Fabry Treated Classic Male	Cytokine	IL5	-0.264861	-1.613	1.08328	-5.61382e-17	-0.386778	0.699222	0.998085	-4.60433
Subgroup	Fabry Non Treated Classic Male .vs. Fabry Treated Classic Male	Chemokine	CCL13	0.206072	-1.03684	1.44898	2.176e-16	0.326406	0.744368	0.998085	-4.60479
Subgroup	Fabry Non Treated Classic Male .vs. Fabry Treated Classic Male	Angiogenesis	TEK	-0.235005	-1.65666	1.18665	-1.07048e-15	-0.325435	0.745102	0.998085	-4.60479
Subgroup	Fabry Non Treated Classic Male .vs. Fabry Treated Classic Male	Cytokine	VEGFA	-0.182418	-1.32884	0.964001	-3.01939e-16	-0.31326	0.754323	0.998085	-4.60488
Subgroup	Fabry Non Treated Classic Male .vs. Fabry Treated Classic Male	Proinflammatory	IL1B	0.219921	-1.20273	1.64257	-5.53509e-17	0.304333	0.761106	0.998085	-4.60494
Subgroup	Fabry Non Treated Classic Male .vs. Fabry Treated Classic Male	Proinflammatory	IL4	-0.200386	-1.66671	1.26593	4.74018e-17	-0.269041	0.788101	0.998085	-4.60515
Subgroup	Fabry Non Treated Classic Male .vs. Fabry Treated Classic Male	Angiogenesis	FLT1	0.187445	-1.25144	1.62633	8.86632e-16	0.256465	0.797785	0.998085	-4.60522
Subgroup	Fabry Non Treated Classic Male .vs. Fabry Treated Classic Male	Chemokine	CXCL10	0.163026	-1.24762	1.57367	-2.7339e-16	0.227519	0.82019	0.998085	-4.60537
Subgroup	Fabry Non Treated Classic Male .vs. Fabry Treated Classic Male	Chemokine	CCL11	0.154541	-1.21327	1.52235	-1.9415e-16	0.222432	0.824144	0.998085	-4.6054
Subgroup	Fabry Non Treated Classic Male .vs. Fabry Treated Classic Male	Chemokine	CCL22	-0.142501	-1.51594	1.23093	2.74249e-16	-0.204263	0.8383	0.998085	-4.60548
Subgroup	Fabry Non Treated Classic Male .vs. Fabry Treated Classic Male	Cytokine	IL15	-0.134681	-1.56555	1.29618	1.55164e-16	-0.185306	0.853127	0.998085	-4.60556
Subgroup	Fabry Non Treated Classic Male .vs. Fabry Treated Classic Male	Vascular_Injury	CRP	0.133289	-1.35612	1.6227	4.17455e-16	0.176181	0.860282	0.998085	-4.6056
Subgroup	Fabry Non Treated Classic Male .vs. Fabry Treated Classic Male	Chemokine	CCL4	-0.0945591	-1.38642	1.1973	1.92519e-16	-0.144102	0.885527	0.998085	-4.60571
Subgroup	Fabry Non Treated Classic Male .vs. Fabry Treated Classic Male	Proinflammatory	IL2	0.085529	-1.40043	1.57149	1.79185e-17	0.113315	0.909864	0.998085	-4.60579
Subgroup	Fabry Non Treated Classic Male .vs. Fabry Treated Classic Male	Vascular_Injury	VCAM1	-0.0815534	-1.53697	1.37386	-2.33831e-16	-0.110315	0.91224	0.998085	-4.6058
Subgroup	Fabry Non Treated Classic Male .vs. Fabry Treated Classic Male	Chemokine	CCL3	0.072449	-1.3159	1.46079	-1.52535e-16	0.102734	0.918249	0.998085	-4.60582
Subgroup	Fabry Non Treated Classic Male .vs. Fabry Treated Classic Male	Proinflammatory	TNF	0.0661414	-1.30068	1.43297	-1.54599e-16	0.0952667	0.924173	0.998085	-4.60583
Subgroup	Fabry Non Treated Classic Male .vs. Fabry Treated Classic Male	Chemokine	CCL17	0.0372906	-1.23321	1.3078	-1.00753e-16	0.0577834	0.953964	0.998085	-4.60589
Subgroup	Fabry Non Treated Classic Male .vs. Fabry Treated Classic Male	Cytokine	IL16	-0.0244321	-1.39711	1.34825	-1.96658e-16	-0.0350406	0.972073	0.998085	-4.60592
Subgroup	Fabry Non Treated Classic Male .vs. Fabry Treated Classic Male	Angiogenesis	PGF	0.00378481	-1.30416	1.31173	-4.4101e-16	0.00569684	0.995459	0.998085	-4.60593
Subgroup	Fabry Non Treated Classic Male .vs. Fabry Treated Classic Male	Cytokine	IL7	-0.00124018	-1.01736	1.01488	5.35605e-17	-0.0024028	0.998085	0.998085	-4.60593
Subgroup	Fabry Non Treated Classic Male .vs. Fabry Treated Non Classic Female	Chemokine	CCL26	-1.50719	-2.93724	-0.077154	-1.51081e-16	-2.07492	0.0389319	1	-4.56467
Subgroup	Fabry Non Treated Classic Male .vs. Fabry Treated Non Classic Female	Cytokine	IL12A	0.631419	-0.884074	2.14691	-4.08231e-16	0.820246	0.412792	1	-4.59827
Subgroup	Fabry Non Treated Classic Male .vs. Fabry Treated Non Classic Female	Vascular_Injury	CRP	-0.637402	-2.22965	0.954844	4.17455e-16	-0.788104	0.431321	1	-4.59876
Subgroup	Fabry Non Treated Classic Male .vs. Fabry Treated Non Classic Female	Proinflammatory	IL12B	-0.599263	-2.19508	0.996556	-7.01309e-17	-0.739289	0.460368	1	-4.59945
Subgroup	Fabry Non Treated Classic Male .vs. Fabry Treated Non Classic Female	Proinflammatory	IL10	0.53402	-0.927388	1.99543	1.23542e-16	0.719393	0.472515	1	-4.59973
Subgroup	Fabry Non Treated Classic Male .vs. Fabry Treated Non Classic Female	Cytokine	IL17A	-0.533137	-2.02273	0.956454	-8.10374e-17	-0.704616	0.481651	1	-4.59992
Subgroup	Fabry Non Treated Classic Male .vs. Fabry Treated Non Classic Female	Cytokine	IL5	-0.494212	-1.93544	0.947014	-5.61382e-17	-0.67509	0.500191	1	-4.60031
Subgroup	Fabry Non Treated Classic Male .vs. Fabry Treated Non Classic Female	Proinflammatory	IL4	-0.477725	-2.04529	1.08984	4.74018e-17	-0.599976	0.54902	1	-4.60121
Subgroup	Fabry Non Treated Classic Male .vs. Fabry Treated Non Classic Female	Chemokine	CCL2	0.453681	-1.09994	2.0073	9.81477e-17	0.574893	0.565838	1	-4.60148
Subgroup	Fabry Non Treated Classic Male .vs. Fabry Treated Non Classic Female	Vascular_Injury	ICAM1	-0.447744	-1.98322	1.08773	7.19539e-16	-0.574073	0.566392	1	-4.60149
Subgroup	Fabry Non Treated Classic Male .vs. Fabry Treated Non Classic Female	Angiogenesis	VEGFD	0.382576	-0.998186	1.76334	-4.7955e-16	0.54548	0.585869	1	-4.60179
Subgroup	Fabry Non Treated Classic Male .vs. Fabry Treated Non Classic Female	Proinflammatory	IL6	0.401251	-1.16622	1.96872	6.72571e-17	0.503961	0.614696	1	-4.6022
Subgroup	Fabry Non Treated Classic Male .vs. Fabry Treated Non Classic Female	Cytokine	IL15	-0.376729	-1.90639	1.15293	1.55164e-16	-0.484858	0.628166	1	-4.60238
Subgroup	Fabry Non Treated Classic Male .vs. Fabry Treated Non Classic Female	Angiogenesis	FGF2	0.243818	-0.855713	1.34335	-1.04703e-16	0.436555	0.66278	1	-4.6028
Subgroup	Fabry Non Treated Classic Male .vs. Fabry Treated Non Classic Female	Cytokine	CSF2	-0.320202	-1.80413	1.16373	4.12432e-17	-0.424806	0.671313	1	-4.60289
Subgroup	Fabry Non Treated Classic Male .vs. Fabry Treated Non Classic Female	Vascular_Injury	SAA1	-0.333649	-1.92652	1.25922	-6.15722e-17	-0.412373	0.68039	1	-4.60299
Subgroup	Fabry Non Treated Classic Male .vs. Fabry Treated Non Classic Female	Proinflammatory	IFNG	0.268959	-1.19283	1.73075	-5.48354e-17	0.362227	0.717463	1	-4.60336
Subgroup	Fabry Non Treated Classic Male .vs. Fabry Treated Non Classic Female	Angiogenesis	PGF	-0.242288	-1.64054	1.15597	-4.4101e-16	-0.341135	0.733265	1	-4.6035
Subgroup	Fabry Non Treated Classic Male .vs. Fabry Treated Non Classic Female	Chemokine	CCL13	0.226676	-1.10205	1.5554	2.176e-16	0.335853	0.73724	1	-4.60353
Subgroup	Fabry Non Treated Classic Male .vs. Fabry Treated Non Classic Female	Chemokine	CCL22	-0.247119	-1.71538	1.22114	2.74249e-16	-0.331347	0.740637	1	-4.60356
Subgroup	Fabry Non Treated Classic Male .vs. Fabry Treated Non Classic Female	Angiogenesis	FLT1	-0.252445	-1.79067	1.28578	8.86632e-16	-0.323092	0.746873	1	-4.60361
Subgroup	Fabry Non Treated Classic Male .vs. Fabry Treated Non Classic Female	Proinflammatory	CXCL8	0.241767	-1.24689	1.73043	-8.03825e-17	0.319729	0.749419	1	-4.60363
Subgroup	Fabry Non Treated Classic Male .vs. Fabry Treated Non Classic Female	Angiogenesis	TEK	-0.244513	-1.76432	1.2753	-1.07048e-15	-0.316733	0.751689	1	-4.60365
Subgroup	Fabry Non Treated Classic Male .vs. Fabry Treated Non Classic Female	Vascular_Injury	VCAM1	-0.23882	-1.79472	1.31708	-2.33831e-16	-0.302182	0.762744	1	-4.60373
Subgroup	Fabry Non Treated Classic Male .vs. Fabry Treated Non Classic Female	Cytokine	LTA	-0.229673	-1.80373	1.34438	-4.4859e-17	-0.287257	0.774134	1	-4.60381
Subgroup	Fabry Non Treated Classic Male .vs. Fabry Treated Non Classic Female	Proinflammatory	TNF	-0.176628	-1.63782	1.28457	-1.54599e-16	-0.237975	0.81208	1	-4.60406
Subgroup	Fabry Non Treated Classic Male .vs. Fabry Treated Non Classic Female	Proinflammatory	IL1B	0.17636	-1.34451	1.69723	-5.53509e-17	0.22829	0.819592	1	-4.6041
Subgroup	Fabry Non Treated Classic Male .vs. Fabry Treated Non Classic Female	Chemokine	CCL17	-0.147191	-1.50542	1.21104	-1.00753e-16	-0.213349	0.831214	1	-4.60416
Subgroup	Fabry Non Treated Classic Male .vs. Fabry Treated Non Classic Female	Cytokine	IL1A	0.122452	-1.16883	1.41374	-6.50974e-17	0.186691	0.852042	1	-4.60426
Subgroup	Fabry Non Treated Classic Male .vs. Fabry Treated Non Classic Female	Cytokine	IL16	-0.135477	-1.60293	1.33198	-1.96658e-16	-0.181752	0.855912	1	-4.60428
Subgroup	Fabry Non Treated Classic Male .vs. Fabry Treated Non Classic Female	Chemokine	CCL4	-0.101737	-1.48279	1.27932	1.92519e-16	-0.145027	0.884797	1	-4.60439
Subgroup	Fabry Non Treated Classic Male .vs. Fabry Treated Non Classic Female	Chemokine	CXCL10	-0.077465	-1.58551	1.43058	-2.7339e-16	-0.101128	0.919523	1	-4.6045
Subgroup	Fabry Non Treated Classic Male .vs. Fabry Treated Non Classic Female	Cytokine	VEGFA	-0.058579	-1.28415	1.16699	-3.01939e-16	-0.0940986	0.9251	1	-4.60451
Subgroup	Fabry Non Treated Classic Male .vs. Fabry Treated Non Classic Female	Proinflammatory	IL2	0.0756999	-1.51286	1.66426	1.79185e-17	0.0938152	0.925325	1	-4.60451
Subgroup	Fabry Non Treated Classic Male .vs. Fabry Treated Non Classic Female	Chemokine	CCL11	0.0625832	-1.39967	1.52483	-1.9415e-16	0.0842591	0.932912	1	-4.60452
Subgroup	Fabry Non Treated Classic Male .vs. Fabry Treated Non Classic Female	Chemokine	CCL3	0.0599277	-1.42427	1.54413	-1.52535e-16	0.0794904	0.936701	1	-4.60453
Subgroup	Fabry Non Treated Classic Male .vs. Fabry Treated Non Classic Female	Angiogenesis	VEGFC	0.0465345	-1.11591	1.20897	7.61746e-17	0.0788107	0.937241	1	-4.60453
Subgroup	Fabry Non Treated Classic Male .vs. Fabry Treated Non Classic Female	Chemokine	CXCL8	0.0248723	-1.43071	1.48045	-1.07009e-17	0.0336403	0.973189	1	-4.60458
Subgroup	Fabry Non Treated Classic Male .vs. Fabry Treated Non Classic Female	Cytokine	IL7	0.0160693	-1.07021	1.10235	5.35605e-17	0.029123	0.976788	1	-4.60458
Subgroup	Fabry Non Treated Classic Male .vs. Fabry Treated Non Classic Female	Proinflammatory	IL13	1.11022e-16	-1.54454	1.54454	5.51698e-17	1.41511e-16	1	1	-4.60459
Subgroup	Fabry Non Treated Classic Male .vs. Fabry Treated Non Classic Male	Chemokine	CCL26	-1.21916	-2.52843	0.0901213	-1.51081e-16	-1.83319	0.0678643	0.999552	-4.56923
Subgroup	Fabry Non Treated Classic Male .vs. Fabry Treated Non Classic Male	Angiogenesis	VEGFC	0.577892	-0.486382	1.64217	7.61746e-17	1.06899	0.28602	0.999552	-4.59366
Subgroup	Fabry Non Treated Classic Male .vs. Fabry Treated Non Classic Male	Proinflammatory	IL12B	-0.705524	-2.16658	0.755531	-7.01309e-17	-0.950661	0.342618	0.999552	-4.59632
Subgroup	Fabry Non Treated Classic Male .vs. Fabry Treated Non Classic Male	Vascular_Injury	SAA1	-0.576498	-2.03485	0.881856	-6.15722e-17	-0.778243	0.437101	0.999552	-4.59963
Subgroup	Fabry Non Treated Classic Male .vs. Fabry Treated Non Classic Male	Cytokine	IL15	-0.508115	-1.9086	0.892368	1.55164e-16	-0.714273	0.475669	0.999552	-4.6007
Subgroup	Fabry Non Treated Classic Male .vs. Fabry Treated Non Classic Male	Cytokine	IL5	-0.474154	-1.79367	0.845363	-5.61382e-17	-0.707432	0.479902	0.999552	-4.60081
Subgroup	Fabry Non Treated Classic Male .vs. Fabry Treated Non Classic Male	Chemokine	CXCL8	0.475338	-0.857322	1.808	-1.07009e-17	0.702205	0.483151	0.999552	-4.60089
Subgroup	Fabry Non Treated Classic Male .vs. Fabry Treated Non Classic Male	Chemokine	CCL2	0.471233	-0.951184	1.89365	9.81477e-17	0.652213	0.514813	0.999552	-4.60164
Subgroup	Fabry Non Treated Classic Male .vs. Fabry Treated Non Classic Male	Cytokine	CSF2	-0.432042	-1.79065	0.926571	4.12432e-17	-0.626052	0.531804	0.999552	-4.60202
Subgroup	Fabry Non Treated Classic Male .vs. Fabry Treated Non Classic Male	Cytokine	IL12A	0.418029	-0.969483	1.80554	-4.08231e-16	0.59313	0.553586	0.999552	-4.60247
Subgroup	Fabry Non Treated Classic Male .vs. Fabry Treated Non Classic Male	Proinflammatory	IL6	0.399848	-1.03525	1.83495	6.72571e-17	0.54852	0.583784	0.999552	-4.60303
Subgroup	Fabry Non Treated Classic Male .vs. Fabry Treated Non Classic Male	Proinflammatory	IL4	-0.398054	-1.83324	1.03713	4.74018e-17	-0.546027	0.585494	0.999552	-4.60307
Subgroup	Fabry Non Treated Classic Male .vs. Fabry Treated Non Classic Male	Angiogenesis	TEK	-0.367977	-1.75944	1.02349	-1.07048e-15	-0.520628	0.603048	0.999552	-4.60337
Subgroup	Fabry Non Treated Classic Male .vs. Fabry Treated Non Classic Male	Angiogenesis	VEGFD	0.295549	-0.96861	1.55971	-4.7955e-16	0.460266	0.645693	0.999552	-4.60403
Subgroup	Fabry Non Treated Classic Male .vs. Fabry Treated Non Classic Male	Angiogenesis	FGF2	0.225589	-0.781089	1.23227	-1.04703e-16	0.441172	0.659438	0.999552	-4.60422
Subgroup	Fabry Non Treated Classic Male .vs. Fabry Treated Non Classic Male	Cytokine	LTA	-0.319666	-1.76079	1.12146	-4.4859e-17	-0.436691	0.662681	0.999552	-4.60427
Subgroup	Fabry Non Treated Classic Male .vs. Fabry Treated Non Classic Male	Proinflammatory	IL10	0.283292	-1.0547	1.62129	1.23542e-16	0.416831	0.67713	0.999552	-4.60446
Subgroup	Fabry Non Treated Classic Male .vs. Fabry Treated Non Classic Male	Chemokine	CCL3	0.267775	-1.09109	1.62664	-1.52535e-16	0.387949	0.698357	0.999552	-4.60472
Subgroup	Fabry Non Treated Classic Male .vs. Fabry Treated Non Classic Male	Proinflammatory	IL13	-0.254985	-1.66909	1.15912	5.51698e-17	-0.354988	0.722873	0.999552	-4.60499
Subgroup	Fabry Non Treated Classic Male .vs. Fabry Treated Non Classic Male	Cytokine	IL1A	-0.211226	-1.39347	0.971014	-6.50974e-17	-0.35174	0.725305	0.999552	-4.60501
Subgroup	Fabry Non Treated Classic Male .vs. Fabry Treated Non Classic Male	Chemokine	CCL4	-0.216172	-1.4806	1.04825	1.92519e-16	-0.336579	0.736693	0.999552	-4.60513
Subgroup	Fabry Non Treated Classic Male .vs. Fabry Treated Non Classic Male	Chemokine	CCL22	-0.213556	-1.55783	1.13071	2.74249e-16	-0.312756	0.754705	0.999552	-4.6053
Subgroup	Fabry Non Treated Classic Male .vs. Fabry Treated Non Classic Male	Cytokine	VEGFA	-0.168409	-1.29049	0.953667	-3.01939e-16	-0.295477	0.767854	0.999552	-4.60542
Subgroup	Fabry Non Treated Classic Male .vs. Fabry Treated Non Classic Male	Proinflammatory	CXCL8	0.180608	-1.18234	1.54355	-8.03825e-17	0.260878	0.794383	0.999552	-4.60564
Subgroup	Fabry Non Treated Classic Male .vs. Fabry Treated Non Classic Male	Cytokine	IL17A	-0.175377	-1.53918	1.18842	-8.10374e-17	-0.253165	0.800332	0.999552	-4.60568
Subgroup	Fabry Non Treated Classic Male .vs. Fabry Treated Non Classic Male	Chemokine	CCL13	0.15228	-1.06424	1.3688	2.176e-16	0.246436	0.80553	0.999552	-4.60572
Subgroup	Fabry Non Treated Classic Male .vs. Fabry Treated Non Classic Male	Proinflammatory	IL1B	0.170852	-1.22159	1.56329	-5.53509e-17	0.241559	0.809303	0.999552	-4.60575
Subgroup	Fabry Non Treated Classic Male .vs. Fabry Treated Non Classic Male	Proinflammatory	IL2	-0.17455	-1.62896	1.27986	1.79185e-17	-0.236273	0.813399	0.999552	-4.60577
Subgroup	Fabry Non Treated Classic Male .vs. Fabry Treated Non Classic Male	Proinflammatory	TNF	-0.130435	-1.46824	1.20737	-1.54599e-16	-0.191948	0.847926	0.999552	-4.60599
Subgroup	Fabry Non Treated Classic Male .vs. Fabry Treated Non Classic Male	Proinflammatory	IFNG	0.113311	-1.22503	1.45166	-5.48354e-17	0.16668	0.867746	0.999552	-4.60609
Subgroup	Fabry Non Treated Classic Male .vs. Fabry Treated Non Classic Male	Vascular_Injury	VCAM1	-0.10974	-1.53425	1.31477	-2.33831e-16	-0.151663	0.879565	0.999552	-4.60614
Subgroup	Fabry Non Treated Classic Male .vs. Fabry Treated Non Classic Male	Angiogenesis	PGF	-0.0979214	-1.3781	1.18225	-4.4101e-16	-0.150587	0.880413	0.999552	-4.60615
Subgroup	Fabry Non Treated Classic Male .vs. Fabry Treated Non Classic Male	Vascular_Injury	CRP	-0.0898039	-1.54759	1.36798	4.17455e-16	-0.121278	0.90356	0.999552	-4.60623
Subgroup	Fabry Non Treated Classic Male .vs. Fabry Treated Non Classic Male	Chemokine	CCL11	0.0673162	-1.27145	1.40608	-1.9415e-16	0.0989908	0.921218	0.999552	-4.60629
Subgroup	Fabry Non Treated Classic Male .vs. Fabry Treated Non Classic Male	Cytokine	IL7	-0.0456224	-1.04017	0.948925	5.35605e-17	-0.0903095	0.928108	0.999552	-4.60631
Subgroup	Fabry Non Treated Classic Male .vs. Fabry Treated Non Classic Male	Angiogenesis	FLT1	-0.0321391	-1.44047	1.37619	8.86632e-16	-0.0449273	0.964198	0.999552	-4.60638
Subgroup	Fabry Non Treated Classic Male .vs. Fabry Treated Non Classic Male	Chemokine	CXCL10	-0.0149036	-1.3956	1.36579	-2.7339e-16	-0.0212508	0.983061	0.999552	-4.60639
Subgroup	Fabry Non Treated Classic Male .vs. Fabry Treated Non Classic Male	Cytokine	IL16	0.0121389	-1.33139	1.35567	-1.96658e-16	0.0177873	0.985822	0.999552	-4.6064
Subgroup	Fabry Non Treated Classic Male .vs. Fabry Treated Non Classic Male	Chemokine	CCL17	-0.00943003	-1.25296	1.2341	-1.00753e-16	-0.0149292	0.9881	0.999552	-4.6064
Subgroup	Fabry Non Treated Classic Male .vs. Fabry Treated Non Classic Male	Vascular_Injury	ICAM1	0.000401387	-1.40541	1.40621	7.19539e-16	0.000562105	0.999552	0.999552	-4.6064
Subgroup	Fabry Non Treated Non Classic Female .vs. Fabry Non Treated Non Classic Male	Proinflammatory	IFNG	-2.37804	-3.57159	-1.1845	-5.48354e-17	-3.92248	0.00011098	0.0045502	0.933669
Subgroup	Fabry Non Treated Non Classic Female .vs. Fabry Non Treated Non Classic Male	Chemokine	CCL3	-0.839074	-2.05092	0.372772	-1.52535e-16	-1.36312	0.17397	0.988219	-5.4429
Subgroup	Fabry Non Treated Non Classic Female .vs. Fabry Non Treated Non Classic Male	Cytokine	IL1A	0.676923	-0.377408	1.73125	-6.50974e-17	1.26399	0.207315	0.988219	-5.56882
Subgroup	Fabry Non Treated Non Classic Female .vs. Fabry Non Treated Non Classic Male	Chemokine	CCL26	0.633964	-0.533659	1.80159	-1.51081e-16	1.06891	0.286054	0.988219	-5.78914
Subgroup	Fabry Non Treated Non Classic Female .vs. Fabry Non Treated Non Classic Male	Cytokine	IL5	0.598258	-0.578498	1.77501	-5.61382e-17	1.00088	0.317772	0.988219	-5.85739
Subgroup	Fabry Non Treated Non Classic Female .vs. Fabry Non Treated Non Classic Male	Proinflammatory	TNF	-0.596684	-1.78975	0.596377	-1.54599e-16	-0.984605	0.325691	0.988219	-5.87306
Subgroup	Fabry Non Treated Non Classic Female .vs. Fabry Non Treated Non Classic Male	Cytokine	IL17A	-0.604242	-1.82049	0.612005	-8.10374e-17	-0.978069	0.328907	0.988219	-5.87928
Subgroup	Fabry Non Treated Non Classic Female .vs. Fabry Non Treated Non Classic Male	Cytokine	VEGFA	-0.435686	-1.43636	0.564991	-3.01939e-16	-0.857155	0.392112	0.988219	-5.98692
Subgroup	Fabry Non Treated Non Classic Female .vs. Fabry Non Treated Non Classic Male	Vascular_Injury	ICAM1	-0.45564	-1.70935	0.798071	7.19539e-16	-0.715492	0.474917	0.988219	-6.09509
Subgroup	Fabry Non Treated Non Classic Female .vs. Fabry Non Treated Non Classic Male	Cytokine	IL12A	-0.442063	-1.67946	0.795331	-4.08231e-16	-0.703326	0.482453	0.988219	-6.10347
Subgroup	Fabry Non Treated Non Classic Female .vs. Fabry Non Treated Non Classic Male	Proinflammatory	IL10	-0.38689	-1.58013	0.806345	1.23542e-16	-0.638326	0.523798	0.988219	-6.14584
Subgroup	Fabry Non Treated Non Classic Female .vs. Fabry Non Treated Non Classic Male	Angiogenesis	PGF	-0.363559	-1.50523	0.778111	-4.4101e-16	-0.626923	0.531234	0.988219	-6.15285
Subgroup	Fabry Non Treated Non Classic Female .vs. Fabry Non Treated Non Classic Male	Proinflammatory	IL4	-0.330685	-1.61059	0.949224	4.74018e-17	-0.508646	0.611412	0.988219	-6.21813
Subgroup	Fabry Non Treated Non Classic Female .vs. Fabry Non Treated Non Classic Male	Angiogenesis	VEGFD	0.288079	-0.839308	1.41547	-4.7955e-16	0.503058	0.615329	0.988219	-6.22088
Subgroup	Fabry Non Treated Non Classic Female .vs. Fabry Non Treated Non Classic Male	Proinflammatory	IL2	0.303247	-0.993804	1.6003	1.79185e-17	0.460277	0.645684	0.988219	-6.24092
Subgroup	Fabry Non Treated Non Classic Female .vs. Fabry Non Treated Non Classic Male	Proinflammatory	IL6	0.285987	-0.993847	1.56582	6.72571e-17	0.43992	0.660344	0.988219	-6.24983
Subgroup	Fabry Non Treated Non Classic Female .vs. Fabry Non Treated Non Classic Male	Chemokine	CCL2	0.237302	-1.03122	1.50582	9.81477e-17	0.368284	0.712947	0.988219	-6.27798
Subgroup	Fabry Non Treated Non Classic Female .vs. Fabry Non Treated Non Classic Male	Chemokine	CCL13	0.199903	-0.885	1.2848	2.176e-16	0.362751	0.717072	0.988219	-6.27995
Subgroup	Fabry Non Treated Non Classic Female .vs. Fabry Non Treated Non Classic Male	Chemokine	CXCL10	-0.221603	-1.45292	1.00971	-2.7339e-16	-0.354313	0.723378	0.988219	-6.28289
Subgroup	Fabry Non Treated Non Classic Female .vs. Fabry Non Treated Non Classic Male	Proinflammatory	IL13	-0.223089	-1.4842	1.03802	5.51698e-17	-0.348261	0.727913	0.988219	-6.28496
Subgroup	Fabry Non Treated Non Classic Female .vs. Fabry Non Treated Non Classic Male	Chemokine	CCL4	0.174839	-0.952786	1.30246	1.92519e-16	0.305249	0.760409	0.988219	-6.29864
Subgroup	Fabry Non Treated Non Classic Female .vs. Fabry Non Treated Non Classic Male	Vascular_Injury	VCAM1	-0.193409	-1.4638	1.07698	-2.33831e-16	-0.299723	0.764617	0.988219	-6.30026
Subgroup	Fabry Non Treated Non Classic Female .vs. Fabry Non Treated Non Classic Male	Cytokine	LTA	-0.19349	-1.4787	1.09172	-4.4859e-17	-0.296391	0.767157	0.988219	-6.30123
Subgroup	Fabry Non Treated Non Classic Female .vs. Fabry Non Treated Non Classic Male	Vascular_Injury	CRP	0.190894	-1.10917	1.49096	4.17455e-16	0.289073	0.772745	0.988219	-6.30331
Subgroup	Fabry Non Treated Non Classic Female .vs. Fabry Non Treated Non Classic Male	Proinflammatory	IL12B	-0.165454	-1.46843	1.13753	-7.01309e-17	-0.249989	0.802784	0.988219	-6.31356
Subgroup	Fabry Non Treated Non Classic Female .vs. Fabry Non Treated Non Classic Male	Chemokine	CCL17	0.125378	-0.98361	1.23437	-1.00753e-16	0.222574	0.824034	0.988219	-6.31987
Subgroup	Fabry Non Treated Non Classic Female .vs. Fabry Non Treated Non Classic Male	Vascular_Injury	SAA1	-0.141808	-1.44238	1.15876	-6.15722e-17	-0.214659	0.830194	0.988219	-6.32155
Subgroup	Fabry Non Treated Non Classic Female .vs. Fabry Non Treated Non Classic Male	Cytokine	IL16	-0.124835	-1.32301	1.07334	-1.96658e-16	-0.205114	0.837636	0.988219	-6.3235
Subgroup	Fabry Non Treated Non Classic Female .vs. Fabry Non Treated Non Classic Male	Cytokine	IL15	-0.123515	-1.37248	1.12545	1.55164e-16	-0.194694	0.845778	0.988219	-6.32553
Subgroup	Fabry Non Treated Non Classic Female .vs. Fabry Non Treated Non Classic Male	Angiogenesis	FGF2	-0.0858746	-0.983638	0.811889	-1.04703e-16	-0.188314	0.85077	0.988219	-6.32672
Subgroup	Fabry Non Treated Non Classic Female .vs. Fabry Non Treated Non Classic Male	Cytokine	CSF2	0.111061	-1.10056	1.32268	4.12432e-17	0.180458	0.856927	0.988219	-6.32813
Subgroup	Fabry Non Treated Non Classic Female .vs. Fabry Non Treated Non Classic Male	Chemokine	CCL22	0.10973	-1.0891	1.30856	2.74249e-16	0.180197	0.857131	0.988219	-6.32817
Subgroup	Fabry Non Treated Non Classic Female .vs. Fabry Non Treated Non Classic Male	Proinflammatory	IL1B	0.112146	-1.12964	1.35393	-5.53509e-17	0.177794	0.859016	0.988219	-6.32859
Subgroup	Fabry Non Treated Non Classic Female .vs. Fabry Non Treated Non Classic Male	Chemokine	CCL11	-0.073949	-1.26787	1.11997	-1.9415e-16	-0.121937	0.903039	0.988219	-6.33674
Subgroup	Fabry Non Treated Non Classic Female .vs. Fabry Non Treated Non Classic Male	Angiogenesis	VEGFC	-0.0513862	-1.00051	0.897742	7.61746e-17	-0.106586	0.915196	0.988219	-6.33844
Subgroup	Fabry Non Treated Non Classic Female .vs. Fabry Non Treated Non Classic Male	Proinflammatory	CXCL8	-0.0644073	-1.27989	1.15108	-8.03825e-17	-0.10432	0.916992	0.988219	-6.33868
Subgroup	Fabry Non Treated Non Classic Female .vs. Fabry Non Treated Non Classic Male	Cytokine	IL7	-0.0222653	-0.90921	0.86468	5.35605e-17	-0.049421	0.96062	0.988219	-6.34278
Subgroup	Fabry Non Treated Non Classic Female .vs. Fabry Non Treated Non Classic Male	Chemokine	CXCL8	-0.0219412	-1.21042	1.16654	-1.07009e-17	-0.0363454	0.971034	0.988219	-6.34333
Subgroup	Fabry Non Treated Non Classic Female .vs. Fabry Non Treated Non Classic Male	Angiogenesis	FLT1	-0.0225332	-1.27849	1.23343	8.86632e-16	-0.0353206	0.97185	0.988219	-6.34337
Subgroup	Fabry Non Treated Non Classic Female .vs. Fabry Non Treated Non Classic Male	Angiogenesis	TEK	-0.0093157	-1.25024	1.23161	-1.07048e-15	-0.0147792	0.988219	0.988219	-6.34387
Subgroup	Fabry Non Treated Non Classic Female .vs. Fabry Treated Classic Female	Cytokine	IL5	0.838659	0.0452903	1.63203	-5.61382e-17	2.08109	0.0383591	0.783799	-4.49866
Subgroup	Fabry Non Treated Non Classic Female .vs. Fabry Treated Classic Female	Chemokine	CCL26	0.777011	-0.0102007	1.56422	-1.51081e-16	1.94319	0.053022	0.783799	-4.51472
Subgroup	Fabry Non Treated Non Classic Female .vs. Fabry Treated Classic Female	Proinflammatory	IFNG	-0.780162	-1.58485	0.0245268	-5.48354e-17	-1.9087	0.0573511	0.783799	-4.51858
Subgroup	Fabry Non Treated Non Classic Female .vs. Fabry Treated Classic Female	Cytokine	CSF2	0.604271	-0.212604	1.42115	4.12432e-17	1.45632	0.146455	0.968418	-4.56301
Subgroup	Fabry Non Treated Non Classic Female .vs. Fabry Treated Classic Female	Angiogenesis	VEGFD	0.535136	-0.224948	1.29522	-4.7955e-16	1.38606	0.16686	0.968418	-4.56888
Subgroup	Fabry Non Treated Non Classic Female .vs. Fabry Treated Classic Female	Cytokine	IL17A	-0.483431	-1.30342	0.336562	-8.10374e-17	-1.16066	0.246796	0.968418	-4.58578
Subgroup	Fabry Non Treated Non Classic Female .vs. Fabry Treated Classic Female	Cytokine	IL15	0.491015	-0.351035	1.33306	1.55164e-16	1.14799	0.25198	0.968418	-4.58664
Subgroup	Fabry Non Treated Non Classic Female .vs. Fabry Treated Classic Female	Proinflammatory	IL13	-0.487568	-1.33781	0.362673	5.51698e-17	-1.12895	0.259913	0.968418	-4.58792
Subgroup	Fabry Non Treated Non Classic Female .vs. Fabry Treated Classic Female	Angiogenesis	VEGFC	0.304838	-0.335064	0.94474	7.61746e-17	0.937855	0.349149	0.968418	-4.5996
Subgroup	Fabry Non Treated Non Classic Female .vs. Fabry Treated Classic Female	Proinflammatory	TNF	-0.377704	-1.18207	0.426659	-1.54599e-16	-0.924442	0.356074	0.968418	-4.60034
Subgroup	Fabry Non Treated Non Classic Female .vs. Fabry Treated Classic Female	Chemokine	CCL22	0.321607	-0.486646	1.12986	2.74249e-16	0.783355	0.434099	0.968418	-4.60748
Subgroup	Fabry Non Treated Non Classic Female .vs. Fabry Treated Classic Female	Chemokine	CCL2	0.328912	-0.526326	1.18415	9.81477e-17	0.757134	0.449623	0.968418	-4.60868
Subgroup	Fabry Non Treated Non Classic Female .vs. Fabry Treated Classic Female	Cytokine	IL7	0.211752	-0.386226	0.80973	5.35605e-17	0.697143	0.486307	0.968418	-4.61127
Subgroup	Fabry Non Treated Non Classic Female .vs. Fabry Treated Classic Female	Chemokine	CXCL8	-0.267781	-1.06905	0.53349	-1.07009e-17	-0.657932	0.511137	0.968418	-4.61284
Subgroup	Fabry Non Treated Non Classic Female .vs. Fabry Treated Classic Female	Proinflammatory	IL10	-0.264067	-1.06855	0.540412	1.23542e-16	-0.64622	0.51868	0.968418	-4.6133
Subgroup	Fabry Non Treated Non Classic Female .vs. Fabry Treated Classic Female	Chemokine	CCL3	-0.244263	-1.06129	0.572763	-1.52535e-16	-0.588576	0.556633	0.968418	-4.61541
Subgroup	Fabry Non Treated Non Classic Female .vs. Fabry Treated Classic Female	Angiogenesis	PGF	0.221591	-0.548123	0.991304	-4.4101e-16	0.566764	0.571341	0.968418	-4.61616
Subgroup	Fabry Non Treated Non Classic Female .vs. Fabry Treated Classic Female	Cytokine	IL1A	0.177736	-0.533094	0.888566	-6.50974e-17	0.492255	0.622936	0.968418	-4.61851
Subgroup	Fabry Non Treated Non Classic Female .vs. Fabry Treated Classic Female	Cytokine	IL12A	-0.20814	-1.04239	0.626111	-4.08231e-16	-0.491178	0.623696	0.968418	-4.61854
Subgroup	Fabry Non Treated Non Classic Female .vs. Fabry Treated Classic Female	Chemokine	CCL13	0.172413	-0.559028	0.903854	2.176e-16	0.464056	0.642978	0.968418	-4.61931
Subgroup	Fabry Non Treated Non Classic Female .vs. Fabry Treated Classic Female	Vascular_Injury	CRP	-0.202064	-1.07857	0.674439	4.17455e-16	-0.453854	0.650295	0.968418	-4.61959
Subgroup	Fabry Non Treated Non Classic Female .vs. Fabry Treated Classic Female	Cytokine	LTA	0.185734	-0.680753	1.05222	-4.4859e-17	0.421997	0.67336	0.968418	-4.62042
Subgroup	Fabry Non Treated Non Classic Female .vs. Fabry Treated Classic Female	Vascular_Injury	SAA1	0.185549	-0.691296	1.06239	-6.15722e-17	0.416597	0.677301	0.968418	-4.62055
Subgroup	Fabry Non Treated Non Classic Female .vs. Fabry Treated Classic Female	Chemokine	CCL4	0.160068	-0.600176	0.920313	1.92519e-16	0.414507	0.678828	0.968418	-4.6206
Subgroup	Fabry Non Treated Non Classic Female .vs. Fabry Treated Classic Female	Angiogenesis	TEK	0.157152	-0.679477	0.99378	-1.07048e-15	0.3698	0.711819	0.968418	-4.62165
Subgroup	Fabry Non Treated Non Classic Female .vs. Fabry Treated Classic Female	Cytokine	IL16	0.136926	-0.670882	0.944734	-1.96658e-16	0.333702	0.738861	0.968418	-4.6224
Subgroup	Fabry Non Treated Non Classic Female .vs. Fabry Treated Classic Female	Cytokine	VEGFA	-0.101161	-0.775817	0.573495	-3.01939e-16	-0.295196	0.768069	0.968418	-4.62312
Subgroup	Fabry Non Treated Non Classic Female .vs. Fabry Treated Classic Female	Chemokine	CXCL10	-0.120694	-0.950846	0.709458	-2.7339e-16	-0.286225	0.774923	0.968418	-4.62328
Subgroup	Fabry Non Treated Non Classic Female .vs. Fabry Treated Classic Female	Proinflammatory	CXCL8	0.114731	-0.704749	0.934211	-8.03825e-17	0.275628	0.783043	0.968418	-4.62346
Subgroup	Fabry Non Treated Non Classic Female .vs. Fabry Treated Classic Female	Chemokine	CCL11	0.111926	-0.693016	0.916868	-1.9415e-16	0.273745	0.784488	0.968418	-4.62349
Subgroup	Fabry Non Treated Non Classic Female .vs. Fabry Treated Classic Female	Proinflammatory	IL6	-0.111722	-0.974587	0.751142	6.72571e-17	-0.254905	0.798989	0.968418	-4.62378
Subgroup	Fabry Non Treated Non Classic Female .vs. Fabry Treated Classic Female	Vascular_Injury	ICAM1	-0.091475	-0.936727	0.753777	7.19539e-16	-0.213057	0.831441	0.968418	-4.62437
Subgroup	Fabry Non Treated Non Classic Female .vs. Fabry Treated Classic Female	Chemokine	CCL17	-0.0735575	-0.821237	0.674122	-1.00753e-16	-0.193683	0.846568	0.968418	-4.6246
Subgroup	Fabry Non Treated Non Classic Female .vs. Fabry Treated Classic Female	Angiogenesis	FGF2	-0.0498207	-0.655093	0.555451	-1.04703e-16	-0.162047	0.871389	0.968418	-4.62494
Subgroup	Fabry Non Treated Non Classic Female .vs. Fabry Treated Classic Female	Angiogenesis	FLT1	0.0668817	-0.779886	0.913649	8.86632e-16	0.155498	0.876544	0.968418	-4.625
Subgroup	Fabry Non Treated Non Classic Female .vs. Fabry Treated Classic Female	Proinflammatory	IL1B	-0.0660688	-0.903282	0.771145	-5.53509e-17	-0.15536	0.876652	0.968418	-4.625
Subgroup	Fabry Non Treated Non Classic Female .vs. Fabry Treated Classic Female	Vascular_Injury	VCAM1	-0.0560641	-0.912559	0.800431	-2.33831e-16	-0.128867	0.897558	0.968418	-4.62522
Subgroup	Fabry Non Treated Non Classic Female .vs. Fabry Treated Classic Female	Proinflammatory	IL4	0.0375969	-0.825317	0.900511	4.74018e-17	0.0857758	0.931708	0.968653	-4.6255
Subgroup	Fabry Non Treated Non Classic Female .vs. Fabry Treated Classic Female	Proinflammatory	IL12B	0.0231495	-0.85532	0.901619	-7.01309e-17	0.0518794	0.958663	0.968653	-4.62564
Subgroup	Fabry Non Treated Non Classic Female .vs. Fabry Treated Classic Female	Proinflammatory	IL2	-0.0174716	-0.891943	0.857	1.79185e-17	-0.0393339	0.968653	0.968653	-4.62567
Subgroup	Fabry Non Treated Non Classic Female .vs. Fabry Treated Classic Male	Cytokine	IL5	1.23062	0.452274	2.00898	-5.61382e-17	3.11265	0.00205134	0.084105	-1.49199
Subgroup	Fabry Non Treated Non Classic Female .vs. Fabry Treated Classic Male	Cytokine	IL15	0.833196	0.0070857	1.65931	1.55164e-16	1.98559	0.0480806	0.98239	-4.10979
Subgroup	Fabry Non Treated Non Classic Female .vs. Fabry Treated Classic Male	Chemokine	CCL26	0.590113	-0.182197	1.36242	-1.51081e-16	1.50426	0.133671	0.98239	-4.88605
Subgroup	Fabry Non Treated Non Classic Female .vs. Fabry Treated Classic Male	Angiogenesis	VEGFD	0.419972	-0.325725	1.16567	-4.7955e-16	1.10876	0.26851	0.98239	-5.36616
Subgroup	Fabry Non Treated Non Classic Female .vs. Fabry Treated Classic Male	Cytokine	IL1A	-0.323795	-1.02117	0.373579	-6.50974e-17	-0.914081	0.361482	0.98239	-5.54962
Subgroup	Fabry Non Treated Non Classic Female .vs. Fabry Treated Classic Male	Chemokine	CCL13	0.316375	-0.40122	1.03397	2.176e-16	0.867966	0.386176	0.98239	-5.58794
Subgroup	Fabry Non Treated Non Classic Female .vs. Fabry Treated Classic Male	Chemokine	CCL22	0.328942	-0.464011	1.12189	2.74249e-16	0.81668	0.414825	0.98239	-5.62824
Subgroup	Fabry Non Treated Non Classic Female .vs. Fabry Treated Classic Male	Cytokine	CSF2	0.312201	-0.489212	1.11361	4.12432e-17	0.766935	0.443784	0.98239	-5.665
Subgroup	Fabry Non Treated Non Classic Female .vs. Fabry Treated Classic Male	Proinflammatory	IL4	0.324751	-0.521829	1.17133	4.74018e-17	0.755202	0.45078	0.98239	-5.67334
Subgroup	Fabry Non Treated Non Classic Female .vs. Fabry Treated Classic Male	Cytokine	IL7	0.22098	-0.365679	0.807639	5.35605e-17	0.741563	0.458991	0.98239	-5.68286
Subgroup	Fabry Non Treated Non Classic Female .vs. Fabry Treated Classic Male	Cytokine	IL16	0.289984	-0.502533	1.0825	-1.96658e-16	0.720353	0.471925	0.98239	-5.69734
Subgroup	Fabry Non Treated Non Classic Female .vs. Fabry Treated Classic Male	Vascular_Injury	ICAM1	0.297242	-0.53201	1.12649	7.19539e-16	0.705673	0.480994	0.98239	-5.70711
Subgroup	Fabry Non Treated Non Classic Female .vs. Fabry Treated Classic Male	Cytokine	LTA	0.304551	-0.545535	1.15464	-4.4859e-17	0.705306	0.481222	0.98239	-5.70735
Subgroup	Fabry Non Treated Non Classic Female .vs. Fabry Treated Classic Male	Proinflammatory	IFNG	-0.282189	-1.07165	0.507268	-5.48354e-17	-0.703708	0.482215	0.98239	-5.7084
Subgroup	Fabry Non Treated Non Classic Female .vs. Fabry Treated Classic Male	Chemokine	CCL2	0.289508	-0.549541	1.12856	9.81477e-17	0.679288	0.497532	0.98239	-5.72417
Subgroup	Fabry Non Treated Non Classic Female .vs. Fabry Treated Classic Male	Angiogenesis	FLT1	0.270727	-0.560012	1.10147	8.86632e-16	0.641574	0.521689	0.98239	-5.74743
Subgroup	Fabry Non Treated Non Classic Female .vs. Fabry Treated Classic Male	Chemokine	CCL3	-0.240063	-1.04162	0.561498	-1.52535e-16	-0.589617	0.555936	0.98239	-5.77731
Subgroup	Fabry Non Treated Non Classic Female .vs. Fabry Treated Classic Male	Chemokine	CCL4	0.209658	-0.536196	0.955512	1.92519e-16	0.553399	0.580444	0.98239	-5.79665
Subgroup	Fabry Non Treated Non Classic Female .vs. Fabry Treated Classic Male	Vascular_Injury	CRP	0.239903	-0.620009	1.09981	4.17455e-16	0.549239	0.583291	0.98239	-5.79879
Subgroup	Fabry Non Treated Non Classic Female .vs. Fabry Treated Classic Male	Angiogenesis	TEK	0.213882	-0.60691	1.03467	-1.07048e-15	0.513004	0.608364	0.98239	-5.81677
Subgroup	Fabry Non Treated Non Classic Female .vs. Fabry Treated Classic Male	Chemokine	CXCL8	0.182793	-0.603311	0.968896	-1.07009e-17	0.457782	0.647473	0.98239	-5.84183
Subgroup	Fabry Non Treated Non Classic Female .vs. Fabry Treated Classic Male	Proinflammatory	CXCL8	0.165214	-0.638754	0.969183	-8.03825e-17	0.404566	0.686114	0.98239	-5.86328
Subgroup	Fabry Non Treated Non Classic Female .vs. Fabry Treated Classic Male	Proinflammatory	IL10	0.160608	-0.628643	0.949859	1.23542e-16	0.40062	0.689014	0.98239	-5.86476
Subgroup	Fabry Non Treated Non Classic Female .vs. Fabry Treated Classic Male	Chemokine	CXCL10	0.164956	-0.649482	0.979393	-2.7339e-16	0.39874	0.690397	0.98239	-5.86546
Subgroup	Fabry Non Treated Non Classic Female .vs. Fabry Treated Classic Male	Proinflammatory	IL2	0.172187	-0.685731	1.03011	1.79185e-17	0.395126	0.693059	0.98239	-5.8668
Subgroup	Fabry Non Treated Non Classic Female .vs. Fabry Treated Classic Male	Chemokine	CCL11	0.146404	-0.643302	0.93611	-1.9415e-16	0.364979	0.71541	0.98239	-5.87752
Subgroup	Fabry Non Treated Non Classic Female .vs. Fabry Treated Classic Male	Cytokine	IL17A	-0.138675	-0.943147	0.665796	-8.10374e-17	-0.339367	0.734595	0.98239	-5.88595
Subgroup	Fabry Non Treated Non Classic Female .vs. Fabry Treated Classic Male	Proinflammatory	TNF	-0.119612	-0.908748	0.669525	-1.54599e-16	-0.298402	0.765624	0.98239	-5.89817
Subgroup	Fabry Non Treated Non Classic Female .vs. Fabry Treated Classic Male	Proinflammatory	IL12B	0.125155	-0.736685	0.986996	-7.01309e-17	0.285892	0.775178	0.98239	-5.90158
Subgroup	Fabry Non Treated Non Classic Female .vs. Fabry Treated Classic Male	Chemokine	CCL17	0.103839	-0.629688	0.837366	-1.00753e-16	0.278692	0.780693	0.98239	-5.90349
Subgroup	Fabry Non Treated Non Classic Female .vs. Fabry Treated Classic Male	Proinflammatory	IL13	-0.110246	-0.944393	0.7239	5.51698e-17	-0.260197	0.794908	0.98239	-5.90815
Subgroup	Fabry Non Treated Non Classic Female .vs. Fabry Treated Classic Male	Cytokine	VEGFA	0.043837	-0.618049	0.705723	-3.01939e-16	0.130388	0.896355	0.98239	-5.93186
Subgroup	Fabry Non Treated Non Classic Female .vs. Fabry Treated Classic Male	Cytokine	IL12A	0.0385442	-0.779915	0.857004	-4.08231e-16	0.0927132	0.926199	0.98239	-5.93579
Subgroup	Fabry Non Treated Non Classic Female .vs. Fabry Treated Classic Male	Vascular_Injury	VCAM1	-0.0382962	-0.878579	0.801986	-2.33831e-16	-0.0897245	0.928572	0.98239	-5.93604
Subgroup	Fabry Non Treated Non Classic Female .vs. Fabry Treated Classic Male	Angiogenesis	PGF	0.0301224	-0.725021	0.785266	-4.4101e-16	0.0785309	0.937463	0.98239	-5.93692
Subgroup	Fabry Non Treated Non Classic Female .vs. Fabry Treated Classic Male	Proinflammatory	IL6	-0.0306452	-0.877176	0.815886	6.72571e-17	-0.0712689	0.943236	0.98239	-5.93743
Subgroup	Fabry Non Treated Non Classic Female .vs. Fabry Treated Classic Male	Vascular_Injury	SAA1	0.0287375	-0.83151	0.888985	-6.15722e-17	0.0657666	0.947612	0.98239	-5.93779
Subgroup	Fabry Non Treated Non Classic Female .vs. Fabry Treated Classic Male	Proinflammatory	IL1B	0.0239286	-0.797437	0.845294	-5.53509e-17	0.0573536	0.954306	0.98239	-5.93827
Subgroup	Fabry Non Treated Non Classic Female .vs. Fabry Treated Classic Male	Angiogenesis	FGF2	-0.0157368	-0.609552	0.578078	-1.04703e-16	-0.052173	0.958429	0.98239	-5.93854
Subgroup	Fabry Non Treated Non Classic Female .vs. Fabry Treated Classic Male	Angiogenesis	VEGFC	-0.00109965	-0.628889	0.62669	7.61746e-17	-0.00344842	0.997251	0.997251	-5.9398
Subgroup	Fabry Non Treated Non Classic Female .vs. Fabry Treated Non Classic Female	Cytokine	IL5	1.00127	0.070966	1.93158	-5.61382e-17	2.11888	0.0350048	0.968624	-4.52025
Subgroup	Fabry Non Treated Non Classic Female .vs. Fabry Treated Non Classic Female	Proinflammatory	IFNG	-0.745334	-1.68892	0.198248	-5.48354e-17	-1.55508	0.121088	0.968624	-4.56476
Subgroup	Fabry Non Treated Non Classic Female .vs. Fabry Treated Non Classic Female	Cytokine	CSF2	0.635765	-0.322106	1.59364	4.12432e-17	1.30668	0.192422	0.968624	-4.58019
Subgroup	Fabry Non Treated Non Classic Female .vs. Fabry Treated Non Classic Female	Cytokine	IL15	0.591149	-0.396242	1.57854	1.55164e-16	1.17866	0.239562	0.968624	-4.58712
Subgroup	Fabry Non Treated Non Classic Female .vs. Fabry Treated Non Classic Female	Vascular_Injury	ICAM1	-0.571309	-1.56245	0.419836	7.19539e-16	-1.13479	0.257461	0.968624	-4.58933
Subgroup	Fabry Non Treated Non Classic Female .vs. Fabry Treated Non Classic Female	Vascular_Injury	CRP	-0.530788	-1.55858	0.497002	4.17455e-16	-1.01671	0.310193	0.968624	-4.59488
Subgroup	Fabry Non Treated Non Classic Female .vs. Fabry Treated Non Classic Female	Cytokine	LTA	0.432051	-0.583995	1.4481	-4.4859e-17	0.837147	0.403243	0.968624	-4.60216
Subgroup	Fabry Non Treated Non Classic Female .vs. Fabry Treated Non Classic Female	Chemokine	CXCL8	-0.374336	-1.31391	0.565238	-1.07009e-17	-0.784351	0.433515	0.968624	-4.60404
Subgroup	Fabry Non Treated Non Classic Female .vs. Fabry Treated Non Classic Female	Chemokine	CCL13	0.336979	-0.520711	1.19467	2.176e-16	0.773486	0.439905	0.968624	-4.60441
Subgroup	Fabry Non Treated Non Classic Female .vs. Fabry Treated Non Classic Female	Proinflammatory	TNF	-0.362381	-1.30558	0.580817	-1.54599e-16	-0.756384	0.450072	0.968624	-4.60498
Subgroup	Fabry Non Treated Non Classic Female .vs. Fabry Treated Non Classic Female	Cytokine	IL12A	0.35468	-0.623566	1.33293	-4.08231e-16	0.713787	0.47597	0.968624	-4.60636
Subgroup	Fabry Non Treated Non Classic Female .vs. Fabry Treated Non Classic Female	Angiogenesis	VEGFD	0.315225	-0.576053	1.2065	-4.7955e-16	0.696286	0.486843	0.968624	-4.6069
Subgroup	Fabry Non Treated Non Classic Female .vs. Fabry Treated Non Classic Female	Cytokine	IL7	0.23829	-0.462902	0.939481	5.35605e-17	0.669035	0.504039	0.968624	-4.60772
Subgroup	Fabry Non Treated Non Classic Female .vs. Fabry Treated Non Classic Female	Chemokine	CCL26	0.311113	-0.611974	1.2342	-1.51081e-16	0.663522	0.507557	0.968624	-4.60788
Subgroup	Fabry Non Treated Non Classic Female .vs. Fabry Treated Non Classic Female	Angiogenesis	VEGFC	-0.246439	-0.996791	0.503912	7.61746e-17	-0.646585	0.518445	0.968624	-4.60836
Subgroup	Fabry Non Treated Non Classic Female .vs. Fabry Treated Non Classic Female	Cytokine	IL1A	0.252916	-0.580606	1.08644	-6.50974e-17	0.597364	0.55076	0.968624	-4.60971
Subgroup	Fabry Non Treated Non Classic Female .vs. Fabry Treated Non Classic Female	Cytokine	IL17A	-0.283752	-1.24528	0.677775	-8.10374e-17	-0.580975	0.561737	0.968624	-4.61013
Subgroup	Fabry Non Treated Non Classic Female .vs. Fabry Treated Non Classic Female	Proinflammatory	IL6	-0.286054	-1.29785	0.725744	6.72571e-17	-0.556588	0.578265	0.968624	-4.61074
Subgroup	Fabry Non Treated Non Classic Female .vs. Fabry Treated Non Classic Female	Chemokine	CCL2	0.27892	-0.723935	1.28178	9.81477e-17	0.547548	0.58445	0.968624	-4.61096
Subgroup	Fabry Non Treated Non Classic Female .vs. Fabry Treated Non Classic Female	Chemokine	CCL3	-0.252585	-1.21063	0.705464	-1.52535e-16	-0.519039	0.604155	0.968624	-4.61163
Subgroup	Fabry Non Treated Non Classic Female .vs. Fabry Treated Non Classic Female	Angiogenesis	PGF	-0.21595	-1.11852	0.686619	-4.4101e-16	-0.471035	0.637992	0.968624	-4.61268
Subgroup	Fabry Non Treated Non Classic Female .vs. Fabry Treated Non Classic Female	Chemokine	CCL22	0.224323	-0.723436	1.17208	2.74249e-16	0.465969	0.64161	0.968624	-4.61278
Subgroup	Fabry Non Treated Non Classic Female .vs. Fabry Treated Non Classic Female	Chemokine	CCL4	0.20248	-0.688986	1.09395	1.92519e-16	0.447155	0.655118	0.968624	-4.61316
Subgroup	Fabry Non Treated Non Classic Female .vs. Fabry Treated Non Classic Female	Cytokine	VEGFA	0.167676	-0.623428	0.958781	-3.01939e-16	0.417271	0.676809	0.968624	-4.61373
Subgroup	Fabry Non Treated Non Classic Female .vs. Fabry Treated Non Classic Female	Angiogenesis	TEK	0.204374	-0.77666	1.18541	-1.07048e-15	0.41013	0.682033	0.968624	-4.61386
Subgroup	Fabry Non Treated Non Classic Female .vs. Fabry Treated Non Classic Female	Proinflammatory	IL13	0.200952	-0.796044	1.19795	5.51698e-17	0.396807	0.69182	0.968624	-4.61409
Subgroup	Fabry Non Treated Non Classic Female .vs. Fabry Treated Non Classic Female	Vascular_Injury	VCAM1	-0.195563	-1.19989	0.808767	-2.33831e-16	-0.383345	0.701763	0.968624	-4.61432
Subgroup	Fabry Non Treated Non Classic Female .vs. Fabry Treated Non Classic Female	Cytokine	IL16	0.178939	-0.7683	1.12618	-1.96658e-16	0.3719	0.710256	0.968624	-4.61451
Subgroup	Fabry Non Treated Non Classic Female .vs. Fabry Treated Non Classic Female	Angiogenesis	FLT1	-0.169163	-1.16209	0.82376	8.86632e-16	-0.335406	0.737577	0.968624	-4.61508
Subgroup	Fabry Non Treated Non Classic Female .vs. Fabry Treated Non Classic Female	Proinflammatory	IL2	0.162358	-0.86305	1.18777	1.79185e-17	0.311715	0.755495	0.968624	-4.61542
Subgroup	Fabry Non Treated Non Classic Female .vs. Fabry Treated Non Classic Female	Proinflammatory	IL10	0.110115	-0.83322	1.05345	1.23542e-16	0.229806	0.818415	0.968624	-4.61639
Subgroup	Fabry Non Treated Non Classic Female .vs. Fabry Treated Non Classic Female	Chemokine	CCL17	-0.080643	-0.957375	0.796089	-1.00753e-16	-0.181084	0.856436	0.968624	-4.61684
Subgroup	Fabry Non Treated Non Classic Female .vs. Fabry Treated Non Classic Female	Vascular_Injury	SAA1	0.0859618	-0.942231	1.11415	-6.15722e-17	0.164593	0.869386	0.968624	-4.61696
Subgroup	Fabry Non Treated Non Classic Female .vs. Fabry Treated Non Classic Female	Chemokine	CXCL10	-0.0755352	-1.04897	0.897904	-2.7339e-16	-0.152764	0.878697	0.968624	-4.61704
Subgroup	Fabry Non Treated Non Classic Female .vs. Fabry Treated Non Classic Female	Proinflammatory	IL12B	-0.0721353	-1.10223	0.957961	-7.01309e-17	-0.137864	0.89045	0.968624	-4.61714
Subgroup	Fabry Non Treated Non Classic Female .vs. Fabry Treated Non Classic Female	Chemokine	CCL11	0.0544465	-0.889432	0.998325	-1.9415e-16	0.113562	0.909668	0.968624	-4.61727
Subgroup	Fabry Non Treated Non Classic Female .vs. Fabry Treated Non Classic Female	Proinflammatory	IL4	0.0474117	-0.964445	1.05927	4.74018e-17	0.0922458	0.92657	0.968624	-4.61737
Subgroup	Fabry Non Treated Non Classic Female .vs. Fabry Treated Non Classic Female	Proinflammatory	CXCL8	-0.0427612	-1.00369	0.918165	-8.03825e-17	-0.0876072	0.930253	0.968624	-4.61739
Subgroup	Fabry Non Treated Non Classic Female .vs. Fabry Treated Non Classic Female	Angiogenesis	FGF2	-0.0169072	-0.726652	0.692837	-1.04703e-16	-0.0468975	0.962629	0.968624	-4.61751
Subgroup	Fabry Non Treated Non Classic Female .vs. Fabry Treated Non Classic Female	Proinflammatory	IL1B	-0.0196323	-1.00135	0.962087	-5.53509e-17	-0.0393698	0.968624	0.968624	-4.61752
Subgroup	Fabry Non Treated Non Classic Female .vs. Fabry Treated Non Classic Male	Cytokine	IL5	1.02133	0.293688	1.74898	-5.61382e-17	2.7633	0.00611162	0.250577	-2.35175
Subgroup	Fabry Non Treated Non Classic Female .vs. Fabry Treated Non Classic Male	Proinflammatory	IFNG	-0.900982	-1.63901	-0.162956	-5.48354e-17	-2.40339	0.0169118	0.346692	-3.10454
Subgroup	Fabry Non Treated Non Classic Female .vs. Fabry Treated Non Classic Male	Chemokine	CCL26	0.599152	-0.122844	1.32115	-1.51081e-16	1.63374	0.103468	0.973263	-4.37565
Subgroup	Fabry Non Treated Non Classic Female .vs. Fabry Treated Non Classic Male	Cytokine	CSF2	0.523925	-0.225278	1.27313	4.12432e-17	1.37673	0.169724	0.973263	-4.69478
Subgroup	Fabry Non Treated Non Classic Female .vs. Fabry Treated Non Classic Male	Cytokine	IL15	0.459763	-0.312529	1.23205	1.55164e-16	1.17201	0.242215	0.973263	-4.91059
Subgroup	Fabry Non Treated Non Classic Female .vs. Fabry Treated Non Classic Male	Angiogenesis	VEGFC	0.284918	-0.301972	0.871809	7.61746e-17	0.955748	0.340046	0.973263	-5.10132
Subgroup	Fabry Non Treated Non Classic Female .vs. Fabry Treated Non Classic Male	Cytokine	IL16	0.326555	-0.414332	1.06744	-1.96658e-16	0.86773	0.386305	0.973263	-5.16793
Subgroup	Fabry Non Treated Non Classic Female .vs. Fabry Treated Non Classic Male	Cytokine	LTA	0.342058	-0.452646	1.13676	-4.4859e-17	0.847373	0.39753	0.973263	-5.18243
Subgroup	Fabry Non Treated Non Classic Female .vs. Fabry Treated Non Classic Male	Proinflammatory	TNF	-0.316188	-1.05391	0.421538	-1.54599e-16	-0.843783	0.39953	0.973263	-5.18495
Subgroup	Fabry Non Treated Non Classic Female .vs. Fabry Treated Non Classic Male	Chemokine	CCL13	0.262584	-0.408262	0.93343	2.176e-16	0.770593	0.441615	0.973263	-5.23403
Subgroup	Fabry Non Treated Non Classic Female .vs. Fabry Treated Non Classic Male	Chemokine	CCL2	0.296472	-0.487915	1.08086	9.81477e-17	0.744105	0.457454	0.973263	-5.2507
Subgroup	Fabry Non Treated Non Classic Female .vs. Fabry Treated Non Classic Male	Proinflammatory	IL6	-0.287457	-1.07884	0.503925	6.72571e-17	-0.715099	0.475159	0.973263	-5.26828
Subgroup	Fabry Non Treated Non Classic Female .vs. Fabry Treated Non Classic Male	Chemokine	CCL22	0.257886	-0.483408	0.99918	2.74249e-16	0.684885	0.493998	0.973263	-5.28587
Subgroup	Fabry Non Treated Non Classic Female .vs. Fabry Treated Non Classic Male	Angiogenesis	VEGFD	0.228198	-0.468918	0.925315	-4.7955e-16	0.644448	0.519827	0.973263	-5.30821
Subgroup	Fabry Non Treated Non Classic Female .vs. Fabry Treated Non Classic Male	Cytokine	IL7	0.176598	-0.371842	0.725038	5.35605e-17	0.633924	0.526662	0.973263	-5.31381
Subgroup	Fabry Non Treated Non Classic Female .vs. Fabry Treated Non Classic Male	Proinflammatory	IL12B	-0.178397	-0.984091	0.627297	-7.01309e-17	-0.43591	0.663247	0.973263	-5.40193
Subgroup	Fabry Non Treated Non Classic Female .vs. Fabry Treated Non Classic Male	Vascular_Injury	SAA1	-0.156887	-0.961092	0.647318	-6.15722e-17	-0.384062	0.701232	0.973263	-5.41962
Subgroup	Fabry Non Treated Non Classic Female .vs. Fabry Treated Non Classic Male	Proinflammatory	IL10	-0.140613	-0.878447	0.59722	1.23542e-16	-0.375188	0.707812	0.973263	-5.42243
Subgroup	Fabry Non Treated Non Classic Female .vs. Fabry Treated Non Classic Male	Cytokine	IL12A	0.14129	-0.623849	0.906429	-4.08231e-16	0.363539	0.716484	0.973263	-5.42601
Subgroup	Fabry Non Treated Non Classic Female .vs. Fabry Treated Non Classic Male	Proinflammatory	IL4	0.127083	-0.664344	0.918511	4.74018e-17	0.316125	0.75215	0.973263	-5.43943
Subgroup	Fabry Non Treated Non Classic Female .vs. Fabry Treated Non Classic Male	Vascular_Injury	ICAM1	-0.123164	-0.898392	0.652064	7.19539e-16	-0.312777	0.754689	0.973263	-5.4403
Subgroup	Fabry Non Treated Non Classic Female .vs. Fabry Treated Non Classic Male	Proinflammatory	CXCL8	-0.103921	-0.855512	0.647671	-8.03825e-17	-0.272207	0.785669	0.973263	-5.45018
Subgroup	Fabry Non Treated Non Classic Female .vs. Fabry Treated Non Classic Male	Chemokine	CCL4	0.0880448	-0.609219	0.785308	1.92519e-16	0.248592	0.803863	0.973263	-5.45531
Subgroup	Fabry Non Treated Non Classic Female .vs. Fabry Treated Non Classic Male	Cytokine	IL1A	-0.0807619	-0.732704	0.57118	-6.50974e-17	-0.243881	0.807507	0.973263	-5.45627
Subgroup	Fabry Non Treated Non Classic Female .vs. Fabry Treated Non Classic Male	Proinflammatory	IL2	-0.0878911	-0.889918	0.714136	1.79185e-17	-0.215743	0.82935	0.973263	-5.46166
Subgroup	Fabry Non Treated Non Classic Female .vs. Fabry Treated Non Classic Male	Angiogenesis	TEK	0.0809103	-0.686409	0.84823	-1.07048e-15	0.207591	0.835704	0.973263	-5.46309
Subgroup	Fabry Non Treated Non Classic Female .vs. Fabry Treated Non Classic Male	Chemokine	CXCL8	0.0761304	-0.658761	0.811022	-1.07009e-17	0.203946	0.838548	0.973263	-5.46372
Subgroup	Fabry Non Treated Non Classic Female .vs. Fabry Treated Non Classic Male	Angiogenesis	PGF	-0.0715838	-0.777532	0.634364	-4.4101e-16	-0.199628	0.84192	0.973263	-5.46444
Subgroup	Fabry Non Treated Non Classic Female .vs. Fabry Treated Non Classic Male	Cytokine	IL17A	0.0740084	-0.678054	0.826071	-8.10374e-17	0.193735	0.846528	0.973263	-5.46541
Subgroup	Fabry Non Treated Non Classic Female .vs. Fabry Treated Non Classic Male	Cytokine	VEGFA	0.0578461	-0.560919	0.676612	-3.01939e-16	0.184047	0.854114	0.973263	-5.46693
Subgroup	Fabry Non Treated Non Classic Female .vs. Fabry Treated Non Classic Male	Vascular_Injury	VCAM1	-0.0664825	-0.852023	0.719058	-2.33831e-16	-0.166617	0.867795	0.973263	-5.46948
Subgroup	Fabry Non Treated Non Classic Female .vs. Fabry Treated Non Classic Male	Chemokine	CCL17	0.0571183	-0.628621	0.742858	-1.00753e-16	0.163982	0.869867	0.973263	-5.46984
Subgroup	Fabry Non Treated Non Classic Female .vs. Fabry Treated Non Classic Male	Chemokine	CCL11	0.0591795	-0.679079	0.797438	-1.9415e-16	0.157813	0.874721	0.973263	-5.47067
Subgroup	Fabry Non Treated Non Classic Female .vs. Fabry Treated Non Classic Male	Proinflammatory	IL13	-0.0540335	-0.833838	0.725771	5.51698e-17	-0.136414	0.891595	0.973263	-5.47329
Subgroup	Fabry Non Treated Non Classic Female .vs. Fabry Treated Non Classic Male	Angiogenesis	FLT1	0.0511428	-0.725475	0.827761	8.86632e-16	0.129646	0.896942	0.973263	-5.47404
Subgroup	Fabry Non Treated Non Classic Female .vs. Fabry Treated Non Classic Male	Angiogenesis	FGF2	-0.0351359	-0.590265	0.519993	-1.04703e-16	-0.124606	0.900928	0.973263	-5.47457
Subgroup	Fabry Non Treated Non Classic Female .vs. Fabry Treated Non Classic Male	Chemokine	CCL3	-0.0447374	-0.794079	0.704604	-1.52535e-16	-0.117536	0.906522	0.973263	-5.47529
Subgroup	Fabry Non Treated Non Classic Female .vs. Fabry Treated Non Classic Male	Proinflammatory	IL1B	-0.0251405	-0.792996	0.742715	-5.53509e-17	-0.0644577	0.948653	0.973263	-5.47931
Subgroup	Fabry Non Treated Non Classic Female .vs. Fabry Treated Non Classic Male	Vascular_Injury	CRP	0.0168099	-0.78708	0.8207	4.17455e-16	0.0411669	0.967193	0.973263	-5.48034
Subgroup	Fabry Non Treated Non Classic Female .vs. Fabry Treated Non Classic Male	Chemokine	CXCL10	-0.0129739	-0.774353	0.748405	-2.7339e-16	-0.0335467	0.973263	0.973263	-5.48057
Subgroup	Fabry Non Treated Non Classic Male .vs. Fabry Treated Classic Female	Proinflammatory	IFNG	1.59788	0.431777	2.76399	-5.48354e-17	2.69766	0.00741822	0.304147	-2.55396
Subgroup	Fabry Non Treated Non Classic Male .vs. Fabry Treated Classic Female	Angiogenesis	PGF	0.585149	-0.530272	1.70057	-4.4101e-16	1.03278	0.302622	0.955987	-4.92964
Subgroup	Fabry Non Treated Non Classic Male .vs. Fabry Treated Classic Female	Cytokine	IL15	0.61453	-0.605716	1.83478	1.55164e-16	0.991462	0.322339	0.955987	-4.96208
Subgroup	Fabry Non Treated Non Classic Male .vs. Fabry Treated Classic Female	Chemokine	CCL3	0.594811	-0.589173	1.77879	-1.52535e-16	0.989039	0.323521	0.955987	-4.96394
Subgroup	Fabry Non Treated Non Classic Male .vs. Fabry Treated Classic Female	Cytokine	IL1A	-0.499187	-1.52928	0.530903	-6.50974e-17	-0.954043	0.340907	0.955987	-4.99033
Subgroup	Fabry Non Treated Non Classic Male .vs. Fabry Treated Classic Female	Cytokine	CSF2	0.493209	-0.690555	1.67697	4.12432e-17	0.82025	0.41279	0.955987	-5.0825
Subgroup	Fabry Non Treated Non Classic Male .vs. Fabry Treated Classic Female	Angiogenesis	VEGFC	0.356224	-0.571082	1.28353	7.61746e-17	0.756276	0.450137	0.955987	-5.1217
Subgroup	Fabry Non Treated Non Classic Male .vs. Fabry Treated Classic Female	Cytokine	VEGFA	0.334525	-0.643145	1.31219	-3.01939e-16	0.673622	0.501122	0.955987	-5.16764
Subgroup	Fabry Non Treated Non Classic Male .vs. Fabry Treated Classic Female	Proinflammatory	IL6	-0.39771	-1.64812	0.852699	6.72571e-17	-0.626173	0.531725	0.955987	-5.19163
Subgroup	Fabry Non Treated Non Classic Male .vs. Fabry Treated Classic Female	Vascular_Injury	CRP	-0.392958	-1.66313	0.877215	4.17455e-16	-0.609065	0.542989	0.955987	-5.19985
Subgroup	Fabry Non Treated Non Classic Male .vs. Fabry Treated Classic Female	Cytokine	LTA	0.379224	-0.876436	1.63488	-4.4859e-17	0.594571	0.552623	0.955987	-5.20664
Subgroup	Fabry Non Treated Non Classic Male .vs. Fabry Treated Classic Female	Vascular_Injury	ICAM1	0.364165	-0.860721	1.58905	7.19539e-16	0.585306	0.558826	0.955987	-5.21089
Subgroup	Fabry Non Treated Non Classic Male .vs. Fabry Treated Classic Female	Proinflammatory	IL4	0.368282	-0.8822	1.61876	4.74018e-17	0.579807	0.562524	0.955987	-5.21338
Subgroup	Fabry Non Treated Non Classic Male .vs. Fabry Treated Classic Female	Cytokine	IL7	0.234017	-0.632536	1.10057	5.35605e-17	0.531659	0.595395	0.955987	-5.23421
Subgroup	Fabry Non Treated Non Classic Male .vs. Fabry Treated Classic Female	Vascular_Injury	SAA1	0.327358	-0.943312	1.59803	-6.15722e-17	0.50719	0.612432	0.955987	-5.2441
Subgroup	Fabry Non Treated Non Classic Male .vs. Fabry Treated Classic Female	Proinflammatory	IL2	-0.320718	-1.58795	0.946511	1.79185e-17	-0.498252	0.618708	0.955987	-5.2476
Subgroup	Fabry Non Treated Non Classic Male .vs. Fabry Treated Classic Female	Angiogenesis	VEGFD	0.247058	-0.854409	1.34852	-4.7955e-16	0.441578	0.659145	0.955987	-5.26834
Subgroup	Fabry Non Treated Non Classic Male .vs. Fabry Treated Classic Female	Cytokine	IL16	0.261761	-0.908864	1.43239	-1.96658e-16	0.440218	0.660128	0.955987	-5.2688
Subgroup	Fabry Non Treated Non Classic Male .vs. Fabry Treated Classic Female	Proinflammatory	IL13	-0.264479	-1.49659	0.967637	5.51698e-17	-0.422591	0.672927	0.955987	-5.27472
Subgroup	Fabry Non Treated Non Classic Male .vs. Fabry Treated Classic Female	Chemokine	CXCL8	-0.24584	-1.40699	0.915312	-1.07009e-17	-0.416816	0.677141	0.955987	-5.27661
Subgroup	Fabry Non Treated Non Classic Male .vs. Fabry Treated Classic Female	Cytokine	IL5	0.240401	-0.9093	1.3901	-5.61382e-17	0.411653	0.680917	0.955987	-5.27828
Subgroup	Fabry Non Treated Non Classic Male .vs. Fabry Treated Classic Female	Cytokine	IL12A	0.233923	-0.975021	1.44287	-4.08231e-16	0.380932	0.70355	0.955987	-5.28776
Subgroup	Fabry Non Treated Non Classic Male .vs. Fabry Treated Classic Female	Proinflammatory	TNF	0.218981	-0.946651	1.38461	-1.54599e-16	0.36985	0.711782	0.955987	-5.291
Subgroup	Fabry Non Treated Non Classic Male .vs. Fabry Treated Classic Female	Chemokine	CCL17	-0.198935	-1.28243	0.884555	-1.00753e-16	-0.361466	0.718031	0.955987	-5.29339
Subgroup	Fabry Non Treated Non Classic Male .vs. Fabry Treated Classic Female	Chemokine	CCL22	0.211876	-0.959392	1.38315	2.74249e-16	0.356128	0.72202	0.955987	-5.29488
Subgroup	Fabry Non Treated Non Classic Male .vs. Fabry Treated Classic Female	Chemokine	CCL11	0.185875	-0.980597	1.35235	-1.9415e-16	0.313709	0.753982	0.955987	-5.30594
Subgroup	Fabry Non Treated Non Classic Male .vs. Fabry Treated Classic Female	Proinflammatory	CXCL8	0.179139	-1.0084	1.36668	-8.03825e-17	0.296976	0.766711	0.955987	-5.30992
Subgroup	Fabry Non Treated Non Classic Male .vs. Fabry Treated Classic Female	Proinflammatory	IL12B	0.188604	-1.08442	1.46163	-7.01309e-17	0.291672	0.770759	0.955987	-5.31114
Subgroup	Fabry Non Treated Non Classic Male .vs. Fabry Treated Classic Female	Proinflammatory	IL1B	-0.178215	-1.39145	1.03502	-5.53509e-17	-0.289187	0.772658	0.955987	-5.3117
Subgroup	Fabry Non Treated Non Classic Male .vs. Fabry Treated Classic Female	Angiogenesis	TEK	0.166467	-1.04592	1.37886	-1.07048e-15	0.270313	0.787124	0.955987	-5.31582
Subgroup	Fabry Non Treated Non Classic Male .vs. Fabry Treated Classic Female	Chemokine	CCL26	0.143047	-0.997731	1.28382	-1.51081e-16	0.246863	0.8052	0.955987	-5.32054
Subgroup	Fabry Non Treated Non Classic Male .vs. Fabry Treated Classic Female	Vascular_Injury	VCAM1	0.137344	-1.10384	1.37852	-2.33831e-16	0.21785	0.827709	0.955987	-5.32579
Subgroup	Fabry Non Treated Non Classic Male .vs. Fabry Treated Classic Female	Proinflammatory	IL10	0.122823	-1.04298	1.28862	1.23542e-16	0.207413	0.835842	0.955987	-5.32752
Subgroup	Fabry Non Treated Non Classic Male .vs. Fabry Treated Classic Female	Cytokine	IL17A	0.120811	-1.06747	1.30909	-8.10374e-17	0.200154	0.841509	0.955987	-5.32867
Subgroup	Fabry Non Treated Non Classic Male .vs. Fabry Treated Classic Female	Chemokine	CXCL10	0.100909	-1.1021	1.30391	-2.7339e-16	0.165137	0.868959	0.955987	-5.33366
Subgroup	Fabry Non Treated Non Classic Male .vs. Fabry Treated Classic Female	Chemokine	CCL2	0.0916102	-1.14775	1.33097	9.81477e-17	0.145522	0.884407	0.955987	-5.33603
Subgroup	Fabry Non Treated Non Classic Male .vs. Fabry Treated Classic Female	Angiogenesis	FLT1	0.0894149	-1.13767	1.3165	8.86632e-16	0.143455	0.886037	0.955987	-5.33627
Subgroup	Fabry Non Treated Non Classic Male .vs. Fabry Treated Classic Female	Angiogenesis	FGF2	0.0360539	-0.841069	0.913176	-1.04703e-16	0.080923	0.935563	0.978961	-5.34173
Subgroup	Fabry Non Treated Non Classic Male .vs. Fabry Treated Classic Female	Chemokine	CCL13	-0.0274899	-1.08745	1.03247	2.176e-16	-0.0510581	0.959317	0.978961	-5.34327
Subgroup	Fabry Non Treated Non Classic Male .vs. Fabry Treated Classic Female	Chemokine	CCL4	-0.0147711	-1.11647	1.08693	1.92519e-16	-0.0263954	0.978961	0.978961	-5.34401
Subgroup	Fabry Non Treated Non Classic Male .vs. Fabry Treated Classic Male	Proinflammatory	IFNG	2.09586	0.940208	3.2515	-5.48354e-17	3.5704	0.000421152	0.0172672	-0.216371
Subgroup	Fabry Non Treated Non Classic Male .vs. Fabry Treated Classic Male	Cytokine	IL1A	-1.00072	-2.02157	0.0201338	-6.50974e-17	-1.92988	0.0546596	0.968528	-4.43722
Subgroup	Fabry Non Treated Non Classic Male .vs. Fabry Treated Classic Male	Cytokine	IL15	0.956712	-0.25259	2.16601	1.55164e-16	1.55749	0.120513	0.968528	-5.05645
Subgroup	Fabry Non Treated Non Classic Male .vs. Fabry Treated Classic Male	Vascular_Injury	ICAM1	0.752882	-0.461019	1.96678	7.19539e-16	1.22102	0.223132	0.968528	-5.50413
Subgroup	Fabry Non Treated Non Classic Male .vs. Fabry Treated Classic Male	Cytokine	IL5	0.632367	-0.507023	1.77176	-5.61382e-17	1.09264	0.275517	0.968528	-5.64669
Subgroup	Fabry Non Treated Non Classic Male .vs. Fabry Treated Classic Male	Proinflammatory	IL4	0.655436	-0.58383	1.8947	4.74018e-17	1.04123	0.298692	0.968528	-5.69939
Subgroup	Fabry Non Treated Non Classic Male .vs. Fabry Treated Classic Male	Chemokine	CCL3	0.599011	-0.574354	1.77238	-1.52535e-16	1.00504	0.31577	0.968528	-5.73498
Subgroup	Fabry Non Treated Non Classic Male .vs. Fabry Treated Classic Male	Cytokine	VEGFA	0.479523	-0.489379	1.44842	-3.01939e-16	0.974338	0.330752	0.968528	-5.76418
Subgroup	Fabry Non Treated Non Classic Male .vs. Fabry Treated Classic Male	Proinflammatory	IL10	0.547499	-0.607846	1.70284	1.23542e-16	0.932936	0.351679	0.968528	-5.80214
Subgroup	Fabry Non Treated Non Classic Male .vs. Fabry Treated Classic Male	Proinflammatory	TNF	0.477073	-0.678104	1.63225	-1.54599e-16	0.813048	0.4169	0.968528	-5.90283
Subgroup	Fabry Non Treated Non Classic Male .vs. Fabry Treated Classic Male	Cytokine	IL12A	0.480607	-0.717495	1.67871	-4.08231e-16	0.789727	0.430373	0.968528	-5.92082
Subgroup	Fabry Non Treated Non Classic Male .vs. Fabry Treated Classic Male	Cytokine	LTA	0.49804	-0.746357	1.74244	-4.4859e-17	0.787927	0.431424	0.968528	-5.92219
Subgroup	Fabry Non Treated Non Classic Male .vs. Fabry Treated Classic Male	Cytokine	IL17A	0.465566	-0.712059	1.64319	-8.10374e-17	0.778314	0.437059	0.968528	-5.92943
Subgroup	Fabry Non Treated Non Classic Male .vs. Fabry Treated Classic Male	Cytokine	IL16	0.414819	-0.745307	1.57494	-1.96658e-16	0.703936	0.482073	0.968528	-5.98251
Subgroup	Fabry Non Treated Non Classic Male .vs. Fabry Treated Classic Male	Angiogenesis	PGF	0.393681	-0.711736	1.4991	-4.4101e-16	0.70113	0.48382	0.968528	-5.9844
Subgroup	Fabry Non Treated Non Classic Male .vs. Fabry Treated Classic Male	Chemokine	CXCL10	0.386558	-0.805656	1.57877	-2.7339e-16	0.638324	0.523799	0.968528	-6.02492
Subgroup	Fabry Non Treated Non Classic Male .vs. Fabry Treated Classic Male	Cytokine	IL7	0.243245	-0.615535	1.10203	5.35605e-17	0.557626	0.577558	0.968528	-6.07142
Subgroup	Fabry Non Treated Non Classic Male .vs. Fabry Treated Classic Male	Proinflammatory	IL6	-0.316633	-1.55583	0.922562	6.72571e-17	-0.503033	0.615347	0.968528	-6.09932
Subgroup	Fabry Non Treated Non Classic Male .vs. Fabry Treated Classic Male	Angiogenesis	FLT1	0.29326	-0.922817	1.50934	8.86632e-16	0.474757	0.63534	0.968528	-6.11265
Subgroup	Fabry Non Treated Non Classic Male .vs. Fabry Treated Classic Male	Proinflammatory	IL12B	0.290609	-0.970996	1.55222	-7.01309e-17	0.453489	0.650558	0.968528	-6.12216
Subgroup	Fabry Non Treated Non Classic Male .vs. Fabry Treated Classic Male	Proinflammatory	CXCL8	0.229622	-0.947267	1.40651	-8.03825e-17	0.384112	0.701195	0.968528	-6.15018
Subgroup	Fabry Non Treated Non Classic Male .vs. Fabry Treated Classic Male	Chemokine	CCL11	0.220353	-0.935658	1.37636	-1.9415e-16	0.375264	0.707756	0.968528	-6.15342
Subgroup	Fabry Non Treated Non Classic Male .vs. Fabry Treated Classic Male	Chemokine	CCL22	0.219211	-0.941553	1.37998	2.74249e-16	0.371791	0.710337	0.968528	-6.15467
Subgroup	Fabry Non Treated Non Classic Male .vs. Fabry Treated Classic Male	Angiogenesis	TEK	0.223197	-0.978319	1.42471	-1.07048e-15	0.365712	0.714863	0.968528	-6.15683
Subgroup	Fabry Non Treated Non Classic Male .vs. Fabry Treated Classic Male	Chemokine	CXCL8	0.204734	-0.946004	1.35547	-1.07009e-17	0.350262	0.726412	0.968528	-6.16216
Subgroup	Fabry Non Treated Non Classic Male .vs. Fabry Treated Classic Male	Cytokine	CSF2	0.201139	-0.972008	1.37429	4.12432e-17	0.33754	0.73597	0.968528	-6.16638
Subgroup	Fabry Non Treated Non Classic Male .vs. Fabry Treated Classic Male	Vascular_Injury	SAA1	0.170546	-1.08873	1.42982	-6.15722e-17	0.266626	0.789959	0.968528	-6.18704
Subgroup	Fabry Non Treated Non Classic Male .vs. Fabry Treated Classic Male	Vascular_Injury	VCAM1	0.155112	-1.07494	1.38516	-2.33831e-16	0.248259	0.804121	0.968528	-6.19161
Subgroup	Fabry Non Treated Non Classic Male .vs. Fabry Treated Classic Male	Angiogenesis	VEGFD	0.131893	-0.959695	1.22348	-4.7955e-16	0.237872	0.812159	0.968528	-6.19404
Subgroup	Fabry Non Treated Non Classic Male .vs. Fabry Treated Classic Male	Chemokine	CCL13	0.116473	-0.93398	1.16692	2.176e-16	0.218287	0.827369	0.968528	-6.19835
Subgroup	Fabry Non Treated Non Classic Male .vs. Fabry Treated Classic Male	Proinflammatory	IL2	-0.131059	-1.38692	1.1248	1.79185e-17	-0.20545	0.837374	0.968528	-6.20097
Subgroup	Fabry Non Treated Non Classic Male .vs. Fabry Treated Classic Male	Proinflammatory	IL13	0.112843	-1.10822	1.33391	5.51698e-17	0.181934	0.855769	0.968528	-6.20537
Subgroup	Fabry Non Treated Non Classic Male .vs. Fabry Treated Classic Male	Angiogenesis	FGF2	0.0701378	-0.799118	0.939394	-1.04703e-16	0.158849	0.873905	0.968528	-6.20916
Subgroup	Fabry Non Treated Non Classic Male .vs. Fabry Treated Classic Male	Proinflammatory	IL1B	-0.0882178	-1.29057	1.11414	-5.53509e-17	-0.144445	0.885256	0.968528	-6.21127
Subgroup	Fabry Non Treated Non Classic Male .vs. Fabry Treated Classic Male	Angiogenesis	VEGFC	0.0502865	-0.868703	0.969276	7.61746e-17	0.107726	0.914292	0.968528	-6.21574
Subgroup	Fabry Non Treated Non Classic Male .vs. Fabry Treated Classic Male	Chemokine	CCL2	0.0522066	-1.17604	1.28045	9.81477e-17	0.08368	0.933372	0.968528	-6.21796
Subgroup	Fabry Non Treated Non Classic Male .vs. Fabry Treated Classic Male	Vascular_Injury	CRP	0.0490087	-1.20977	1.30779	4.17455e-16	0.0766484	0.938959	0.968528	-6.2185
Subgroup	Fabry Non Treated Non Classic Male .vs. Fabry Treated Classic Male	Chemokine	CCL26	-0.0438512	-1.1744	1.0867	-1.51081e-16	-0.0763614	0.939188	0.968528	-6.21852
Subgroup	Fabry Non Treated Non Classic Male .vs. Fabry Treated Classic Male	Chemokine	CCL4	0.0348186	-1.057	1.12664	1.92519e-16	0.0627829	0.949985	0.968528	-6.21943
Subgroup	Fabry Non Treated Non Classic Male .vs. Fabry Treated Classic Male	Chemokine	CCL17	-0.0215389	-1.09531	1.05223	-1.00753e-16	-0.0394903	0.968528	0.968528	-6.22058
Subgroup	Fabry Non Treated Non Classic Male .vs. Fabry Treated Non Classic Female	Proinflammatory	IFNG	1.63271	0.366763	2.89866	-5.48354e-17	2.53906	0.0116712	0.478517	-3.84942
Subgroup	Fabry Non Treated Non Classic Male .vs. Fabry Treated Non Classic Female	Cytokine	IL12A	0.796743	-0.515712	2.1092	-4.08231e-16	1.19513	0.233076	0.997491	-4.55944
Subgroup	Fabry Non Treated Non Classic Male .vs. Fabry Treated Non Classic Female	Cytokine	VEGFA	0.603362	-0.458016	1.66474	-3.01939e-16	1.11915	0.264062	0.997491	-4.58472
Subgroup	Fabry Non Treated Non Classic Male .vs. Fabry Treated Non Classic Female	Cytokine	IL15	0.714664	-0.61006	2.03939	1.55164e-16	1.06208	0.28914	0.997491	-4.60263
Subgroup	Fabry Non Treated Non Classic Male .vs. Fabry Treated Non Classic Female	Vascular_Injury	CRP	-0.721682	-2.10061	0.657243	4.17455e-16	-1.03035	0.303758	0.997491	-4.61219
Subgroup	Fabry Non Treated Non Classic Male .vs. Fabry Treated Non Classic Female	Cytokine	LTA	0.625541	-0.737629	1.98871	-4.4859e-17	0.903413	0.367104	0.997491	-4.64757
Subgroup	Fabry Non Treated Non Classic Male .vs. Fabry Treated Non Classic Female	Chemokine	CCL3	0.586489	-0.698867	1.87185	-1.52535e-16	0.898291	0.369823	0.997491	-4.6489
Subgroup	Fabry Non Treated Non Classic Male .vs. Fabry Treated Non Classic Female	Proinflammatory	IL6	-0.572041	-1.92951	0.785428	6.72571e-17	-0.829617	0.407481	0.997491	-4.66603
Subgroup	Fabry Non Treated Non Classic Male .vs. Fabry Treated Non Classic Female	Cytokine	CSF2	0.524703	-0.760415	1.80982	4.12432e-17	0.803806	0.42221	0.997491	-4.67211
Subgroup	Fabry Non Treated Non Classic Male .vs. Fabry Treated Non Classic Female	Proinflammatory	IL10	0.497005	-0.768612	1.76262	1.23542e-16	0.773106	0.440129	0.997491	-4.67911
Subgroup	Fabry Non Treated Non Classic Male .vs. Fabry Treated Non Classic Female	Cytokine	IL1A	-0.424007	-1.54229	0.69428	-6.50974e-17	-0.746449	0.45604	0.997491	-4.68496
Subgroup	Fabry Non Treated Non Classic Male .vs. Fabry Treated Non Classic Female	Cytokine	IL5	0.403015	-0.845124	1.65115	-5.61382e-17	0.63568	0.525518	0.997491	-4.70709
Subgroup	Fabry Non Treated Non Classic Male .vs. Fabry Treated Non Classic Female	Proinflammatory	IL13	0.424041	-0.913569	1.76165	5.51698e-17	0.624106	0.53308	0.997491	-4.7092
Subgroup	Fabry Non Treated Non Classic Male .vs. Fabry Treated Non Classic Female	Chemokine	CXCL8	-0.352395	-1.61297	0.908176	-1.07009e-17	-0.550354	0.582527	0.997491	-4.72173
Subgroup	Fabry Non Treated Non Classic Male .vs. Fabry Treated Non Classic Female	Proinflammatory	IL4	0.378096	-0.979451	1.73564	4.74018e-17	0.548312	0.583926	0.997491	-4.72205
Subgroup	Fabry Non Treated Non Classic Male .vs. Fabry Treated Non Classic Female	Cytokine	IL7	0.260555	-0.680192	1.2013	5.35605e-17	0.545264	0.586018	0.997491	-4.72254
Subgroup	Fabry Non Treated Non Classic Male .vs. Fabry Treated Non Classic Female	Chemokine	CCL26	-0.322851	-1.5613	0.9156	-1.51081e-16	-0.513221	0.608213	0.997491	-4.72744
Subgroup	Fabry Non Treated Non Classic Male .vs. Fabry Treated Non Classic Female	Cytokine	IL17A	0.32049	-0.969534	1.61051	-8.10374e-17	0.489099	0.625165	0.997491	-4.73094
Subgroup	Fabry Non Treated Non Classic Male .vs. Fabry Treated Non Classic Female	Cytokine	IL16	0.303774	-0.96708	1.57463	-1.96658e-16	0.470582	0.638316	0.997491	-4.73352
Subgroup	Fabry Non Treated Non Classic Male .vs. Fabry Treated Non Classic Female	Angiogenesis	VEGFC	-0.195053	-1.20176	0.811649	7.61746e-17	-0.381445	0.70317	0.997491	-4.74452
Subgroup	Fabry Non Treated Non Classic Male .vs. Fabry Treated Non Classic Female	Proinflammatory	TNF	0.234304	-1.03113	1.49974	-1.54599e-16	0.364519	0.715753	0.997491	-4.74635
Subgroup	Fabry Non Treated Non Classic Male .vs. Fabry Treated Non Classic Female	Chemokine	CCL17	-0.206021	-1.38228	0.970239	-1.00753e-16	-0.344817	0.730498	0.997491	-4.74837
Subgroup	Fabry Non Treated Non Classic Male .vs. Fabry Treated Non Classic Female	Vascular_Injury	SAA1	0.22777	-1.15169	1.60724	-6.15722e-17	0.325062	0.745383	0.997491	-4.75029
Subgroup	Fabry Non Treated Non Classic Male .vs. Fabry Treated Non Classic Female	Angiogenesis	TEK	0.213689	-1.10251	1.52988	-1.07048e-15	0.319627	0.749496	0.997491	-4.7508
Subgroup	Fabry Non Treated Non Classic Male .vs. Fabry Treated Non Classic Female	Angiogenesis	PGF	0.147608	-1.06332	1.35853	-4.4101e-16	0.23998	0.810526	0.997491	-4.75725
Subgroup	Fabry Non Treated Non Classic Male .vs. Fabry Treated Non Classic Female	Chemokine	CCL13	0.137077	-1.01364	1.28779	2.176e-16	0.234518	0.814759	0.997491	-4.75763
Subgroup	Fabry Non Treated Non Classic Male .vs. Fabry Treated Non Classic Female	Chemokine	CXCL10	0.146068	-1.15994	1.45207	-2.7339e-16	0.220186	0.825891	0.997491	-4.75857
Subgroup	Fabry Non Treated Non Classic Male .vs. Fabry Treated Non Classic Female	Angiogenesis	FLT1	-0.14663	-1.47878	1.18552	8.86632e-16	-0.216696	0.828607	0.997491	-4.7588
Subgroup	Fabry Non Treated Non Classic Male .vs. Fabry Treated Non Classic Female	Proinflammatory	IL2	-0.140888	-1.51662	1.23484	1.79185e-17	-0.201615	0.840368	0.997491	-4.75971
Subgroup	Fabry Non Treated Non Classic Male .vs. Fabry Treated Non Classic Female	Chemokine	CCL11	0.128395	-1.13795	1.39474	-1.9415e-16	0.199608	0.841936	0.997491	-4.75983
Subgroup	Fabry Non Treated Non Classic Male .vs. Fabry Treated Non Classic Female	Proinflammatory	IL1B	-0.131779	-1.44889	1.18534	-5.53509e-17	-0.196971	0.843997	0.997491	-4.75998
Subgroup	Fabry Non Treated Non Classic Male .vs. Fabry Treated Non Classic Female	Chemokine	CCL22	0.114593	-1.15696	1.38615	2.74249e-16	0.177421	0.85931	0.997491	-4.76104
Subgroup	Fabry Non Treated Non Classic Male .vs. Fabry Treated Non Classic Female	Vascular_Injury	ICAM1	-0.115669	-1.44543	1.21409	7.19539e-16	-0.171248	0.864156	0.997491	-4.76135
Subgroup	Fabry Non Treated Non Classic Male .vs. Fabry Treated Non Classic Female	Angiogenesis	FGF2	0.0689674	-0.883255	1.02119	-1.04703e-16	0.142589	0.88672	0.997491	-4.76266
Subgroup	Fabry Non Treated Non Classic Male .vs. Fabry Treated Non Classic Female	Proinflammatory	IL12B	0.0933189	-1.2887	1.47534	-7.01309e-17	0.132934	0.894344	0.997491	-4.76304
Subgroup	Fabry Non Treated Non Classic Male .vs. Fabry Treated Non Classic Female	Chemokine	CCL2	0.0416186	-1.30385	1.38709	9.81477e-17	0.0608966	0.951486	0.997491	-4.76507
Subgroup	Fabry Non Treated Non Classic Male .vs. Fabry Treated Non Classic Female	Chemokine	CCL4	0.0276407	-1.16839	1.22367	1.92519e-16	0.0454977	0.963744	0.997491	-4.7653
Subgroup	Fabry Non Treated Non Classic Male .vs. Fabry Treated Non Classic Female	Angiogenesis	VEGFD	0.0271461	-1.16863	1.22292	-4.7955e-16	0.0446929	0.964385	0.997491	-4.76531
Subgroup	Fabry Non Treated Non Classic Male .vs. Fabry Treated Non Classic Female	Proinflammatory	CXCL8	0.0216462	-1.26757	1.31086	-8.03825e-17	0.0330549	0.973655	0.997491	-4.76544
Subgroup	Fabry Non Treated Non Classic Male .vs. Fabry Treated Non Classic Female	Vascular_Injury	VCAM1	-0.00215417	-1.3496	1.3453	-2.33831e-16	-0.00314737	0.997491	0.997491	-4.7656
Subgroup	Fabry Non Treated Non Classic Male .vs. Fabry Treated Non Classic Male	Proinflammatory	IFNG	1.47706	0.35592	2.5982	-5.48354e-17	2.59369	0.0100083	0.410338	-3.07407
Subgroup	Fabry Non Treated Non Classic Male .vs. Fabry Treated Non Classic Male	Cytokine	IL1A	-0.757685	-1.74806	0.232687	-6.50974e-17	-1.50616	0.133184	0.983406	-4.37356
Subgroup	Fabry Non Treated Non Classic Male .vs. Fabry Treated Non Classic Male	Chemokine	CCL3	0.794337	-0.343994	1.93267	-1.52535e-16	1.37378	0.170639	0.983406	-4.48605
Subgroup	Fabry Non Treated Non Classic Male .vs. Fabry Treated Non Classic Male	Cytokine	IL17A	0.67825	-0.464214	1.82071	-8.10374e-17	1.16877	0.243519	0.983406	-4.64021
Subgroup	Fabry Non Treated Non Classic Male .vs. Fabry Treated Non Classic Male	Cytokine	VEGFA	0.493532	-0.446441	1.4335	-3.01939e-16	1.03367	0.302208	0.983406	-4.72839
Subgroup	Fabry Non Treated Non Classic Male .vs. Fabry Treated Non Classic Male	Cytokine	IL12A	0.583353	-0.578977	1.74568	-4.08231e-16	0.988058	0.324	0.983406	-4.75575
Subgroup	Fabry Non Treated Non Classic Male .vs. Fabry Treated Non Classic Male	Cytokine	IL15	0.583278	-0.589917	1.75647	1.55164e-16	0.978782	0.328556	0.983406	-4.76116
Subgroup	Fabry Non Treated Non Classic Male .vs. Fabry Treated Non Classic Male	Proinflammatory	IL6	-0.573444	-1.77564	0.628751	6.72571e-17	-0.939066	0.348528	0.983406	-4.78377
Subgroup	Fabry Non Treated Non Classic Male .vs. Fabry Treated Non Classic Male	Cytokine	LTA	0.535548	-0.671695	1.74279	-4.4859e-17	0.873342	0.383246	0.983406	-4.81915
Subgroup	Fabry Non Treated Non Classic Male .vs. Fabry Treated Non Classic Male	Cytokine	IL16	0.45139	-0.674098	1.57688	-1.96658e-16	0.789571	0.430465	0.983406	-4.86054
Subgroup	Fabry Non Treated Non Classic Male .vs. Fabry Treated Non Classic Male	Cytokine	IL5	0.423073	-0.682297	1.52844	-5.61382e-17	0.753509	0.451795	0.983406	-4.87709
Subgroup	Fabry Non Treated Non Classic Male .vs. Fabry Treated Non Classic Male	Proinflammatory	IL4	0.457768	-0.744496	1.66003	4.74018e-17	0.749594	0.454146	0.983406	-4.87884
Subgroup	Fabry Non Treated Non Classic Male .vs. Fabry Treated Non Classic Male	Angiogenesis	VEGFC	0.336304	-0.555246	1.22786	7.61746e-17	0.74262	0.458351	0.983406	-4.88193
Subgroup	Fabry Non Treated Non Classic Male .vs. Fabry Treated Non Classic Male	Cytokine	CSF2	0.412863	-0.725257	1.55098	4.12432e-17	0.714165	0.475736	0.983406	-4.89426
Subgroup	Fabry Non Treated Non Classic Male .vs. Fabry Treated Non Classic Male	Proinflammatory	IL2	-0.391138	-1.6095	0.827229	1.79185e-17	-0.632022	0.527902	0.983406	-4.92716
Subgroup	Fabry Non Treated Non Classic Male .vs. Fabry Treated Non Classic Male	Vascular_Injury	ICAM1	0.332476	-0.84518	1.51013	7.19539e-16	0.555805	0.5788	0.983406	-4.95411
Subgroup	Fabry Non Treated Non Classic Male .vs. Fabry Treated Non Classic Male	Angiogenesis	PGF	0.291975	-0.780437	1.36439	-4.4101e-16	0.535999	0.592396	0.983406	-4.96055
Subgroup	Fabry Non Treated Non Classic Male .vs. Fabry Treated Non Classic Male	Proinflammatory	TNF	0.280496	-0.84019	1.40118	-1.54599e-16	0.492746	0.622589	0.983406	-4.9738
Subgroup	Fabry Non Treated Non Classic Male .vs. Fabry Treated Non Classic Male	Cytokine	IL7	0.198863	-0.634277	1.032	5.35605e-17	0.469912	0.638793	0.983406	-4.98035
Subgroup	Fabry Non Treated Non Classic Male .vs. Fabry Treated Non Classic Male	Proinflammatory	IL10	0.246277	-0.874572	1.36713	1.23542e-16	0.43257	0.665669	0.983406	-4.99039
Subgroup	Fabry Non Treated Non Classic Male .vs. Fabry Treated Non Classic Male	Chemokine	CXCL10	0.208629	-0.947989	1.36525	-2.7339e-16	0.355112	0.72278	0.983406	-5.00857
Subgroup	Fabry Non Treated Non Classic Male .vs. Fabry Treated Non Classic Male	Proinflammatory	IL13	0.169055	-1.01555	1.35366	5.51698e-17	0.280954	0.778959	0.983406	-5.02263
Subgroup	Fabry Non Treated Non Classic Male .vs. Fabry Treated Non Classic Male	Vascular_Injury	CRP	-0.174084	-1.39528	1.04711	4.17455e-16	-0.280643	0.779197	0.983406	-5.02268
Subgroup	Fabry Non Treated Non Classic Male .vs. Fabry Treated Non Classic Male	Chemokine	CCL22	0.148156	-0.977951	1.27426	2.74249e-16	0.259012	0.795822	0.983406	-5.02616
Subgroup	Fabry Non Treated Non Classic Male .vs. Fabry Treated Non Classic Male	Chemokine	CCL11	0.133128	-0.988367	1.25462	-1.9415e-16	0.233697	0.815395	0.983406	-5.02988
Subgroup	Fabry Non Treated Non Classic Male .vs. Fabry Treated Non Classic Male	Proinflammatory	IL1B	-0.137287	-1.30374	1.02917	-5.53509e-17	-0.231708	0.816939	0.983406	-5.03016
Subgroup	Fabry Non Treated Non Classic Male .vs. Fabry Treated Non Classic Male	Vascular_Injury	VCAM1	0.126926	-1.0664	1.32025	-2.33831e-16	0.209398	0.834294	0.983406	-5.03309
Subgroup	Fabry Non Treated Non Classic Male .vs. Fabry Treated Non Classic Male	Chemokine	CXCL8	0.0980716	-1.01831	1.21445	-1.07009e-17	0.172946	0.862822	0.983406	-5.03725
Subgroup	Fabry Non Treated Non Classic Male .vs. Fabry Treated Non Classic Male	Chemokine	CCL4	-0.0867945	-1.14601	0.972425	1.92519e-16	-0.161319	0.871961	0.983406	-5.03841
Subgroup	Fabry Non Treated Non Classic Male .vs. Fabry Treated Non Classic Male	Angiogenesis	TEK	0.090226	-1.07542	1.25587	-1.07048e-15	0.152387	0.878995	0.983406	-5.03924
Subgroup	Fabry Non Treated Non Classic Male .vs. Fabry Treated Non Classic Male	Chemokine	CCL17	-0.0682595	-1.10997	0.973453	-1.00753e-16	-0.129002	0.897451	0.983406	-5.04121
Subgroup	Fabry Non Treated Non Classic Male .vs. Fabry Treated Non Classic Male	Angiogenesis	FLT1	0.0736761	-1.10609	1.25344	8.86632e-16	0.122945	0.902241	0.983406	-5.04166
Subgroup	Fabry Non Treated Non Classic Male .vs. Fabry Treated Non Classic Male	Chemokine	CCL13	0.0626811	-0.956407	1.08177	2.176e-16	0.121089	0.90371	0.983406	-5.0418
Subgroup	Fabry Non Treated Non Classic Male .vs. Fabry Treated Non Classic Male	Angiogenesis	FGF2	0.0507387	-0.792563	0.894041	-1.04703e-16	0.11845	0.905798	0.983406	-5.04198
Subgroup	Fabry Non Treated Non Classic Male .vs. Fabry Treated Non Classic Male	Angiogenesis	VEGFD	-0.0598804	-1.11888	0.999116	-4.7955e-16	-0.111319	0.911445	0.983406	-5.04247
Subgroup	Fabry Non Treated Non Classic Male .vs. Fabry Treated Non Classic Male	Chemokine	CCL2	0.0591708	-1.1324	1.25074	9.81477e-17	0.0977616	0.922193	0.983406	-5.04332
Subgroup	Fabry Non Treated Non Classic Male .vs. Fabry Treated Non Classic Male	Proinflammatory	CXCL8	-0.0395132	-1.18126	1.10224	-8.03825e-17	-0.0681321	0.94573	0.983406	-5.04478
Subgroup	Fabry Non Treated Non Classic Male .vs. Fabry Treated Non Classic Male	Chemokine	CCL26	-0.0348119	-1.1316	1.06198	-1.51081e-16	-0.0624862	0.950221	0.983406	-5.045
Subgroup	Fabry Non Treated Non Classic Male .vs. Fabry Treated Non Classic Male	Vascular_Injury	SAA1	-0.0150787	-1.23675	1.2066	-6.15722e-17	-0.024299	0.980632	0.983406	-5.04599
Subgroup	Fabry Non Treated Non Classic Male .vs. Fabry Treated Non Classic Male	Proinflammatory	IL12B	-0.0129425	-1.23688	1.21099	-7.01309e-17	-0.0208179	0.983406	0.983406	-5.04604
Subgroup	Fabry Treated Classic Female .vs. Fabry Treated Classic Male	Cytokine	IL1A	-0.501531	-1.16168	0.158623	-6.50974e-17	-1.49566	0.135899	0.991314	-4.55449
Subgroup	Fabry Treated Classic Female .vs. Fabry Treated Classic Male	Proinflammatory	IFNG	0.497973	-0.249349	1.24529	-5.48354e-17	1.31183	0.19068	0.991314	-4.5719
Subgroup	Fabry Treated Classic Female .vs. Fabry Treated Classic Male	Chemokine	CXCL8	0.450574	-0.293574	1.19472	-1.07009e-17	1.19203	0.234286	0.991314	-4.58205
Subgroup	Fabry Treated Classic Female .vs. Fabry Treated Classic Male	Proinflammatory	IL10	0.424676	-0.322451	1.1718	1.23542e-16	1.11903	0.264111	0.991314	-4.58777
Subgroup	Fabry Treated Classic Female .vs. Fabry Treated Classic Male	Vascular_Injury	CRP	0.441967	-0.372049	1.25598	4.17455e-16	1.0689	0.28606	0.991314	-4.59149
Subgroup	Fabry Treated Classic Female .vs. Fabry Treated Classic Male	Cytokine	IL5	0.391966	-0.344843	1.12877	-5.61382e-17	1.04731	0.295886	0.991314	-4.59304
Subgroup	Fabry Treated Classic Female .vs. Fabry Treated Classic Male	Angiogenesis	VEGFC	-0.305938	-0.90022	0.288345	7.61746e-17	-1.01349	0.311724	0.991314	-4.59541
Subgroup	Fabry Treated Classic Female .vs. Fabry Treated Classic Male	Vascular_Injury	ICAM1	0.388716	-0.396276	1.17371	7.19539e-16	0.974872	0.330488	0.991314	-4.59802
Subgroup	Fabry Treated Classic Female .vs. Fabry Treated Classic Male	Proinflammatory	IL13	0.377322	-0.412305	1.16695	5.51698e-17	0.940742	0.34767	0.991314	-4.60024
Subgroup	Fabry Treated Classic Female .vs. Fabry Treated Classic Male	Cytokine	IL17A	0.344756	-0.416779	1.10629	-8.10374e-17	0.891255	0.373578	0.991314	-4.60333
Subgroup	Fabry Treated Classic Female .vs. Fabry Treated Classic Male	Cytokine	IL15	0.342182	-0.439837	1.1242	1.55164e-16	0.86143	0.389758	0.991314	-4.6051
Subgroup	Fabry Treated Classic Female .vs. Fabry Treated Classic Male	Cytokine	CSF2	-0.29207	-1.05071	0.466569	4.12432e-17	-0.757935	0.449145	0.991314	-4.61081
Subgroup	Fabry Treated Classic Female .vs. Fabry Treated Classic Male	Chemokine	CXCL10	0.285649	-0.48532	1.05662	-2.7339e-16	0.729418	0.466372	0.991314	-4.61226
Subgroup	Fabry Treated Classic Female .vs. Fabry Treated Classic Male	Proinflammatory	IL4	0.287154	-0.514242	1.08855	4.74018e-17	0.705421	0.48115	0.991314	-4.61343
Subgroup	Fabry Treated Classic Female .vs. Fabry Treated Classic Male	Proinflammatory	TNF	0.258092	-0.488926	1.00511	-1.54599e-16	0.680179	0.496968	0.991314	-4.61462
Subgroup	Fabry Treated Classic Female .vs. Fabry Treated Classic Male	Cytokine	IL12A	0.246684	-0.528092	1.02146	-4.08231e-16	0.626823	0.5313	0.991314	-4.617
Subgroup	Fabry Treated Classic Female .vs. Fabry Treated Classic Male	Angiogenesis	PGF	-0.191468	-0.906308	0.523372	-4.4101e-16	-0.527313	0.598405	0.991314	-4.62092
Subgroup	Fabry Treated Classic Female .vs. Fabry Treated Classic Male	Angiogenesis	FLT1	0.203845	-0.582555	0.990245	8.86632e-16	0.510313	0.610245	0.991314	-4.62153
Subgroup	Fabry Treated Classic Female .vs. Fabry Treated Classic Male	Chemokine	CCL26	-0.186898	-0.917988	0.544192	-1.51081e-16	-0.503284	0.615171	0.991314	-4.62177
Subgroup	Fabry Treated Classic Female .vs. Fabry Treated Classic Male	Chemokine	CCL17	0.177396	-0.51698	0.871773	-1.00753e-16	0.502956	0.615401	0.991314	-4.62178
Subgroup	Fabry Treated Classic Female .vs. Fabry Treated Classic Male	Proinflammatory	IL2	0.189659	-0.62247	1.00179	1.79185e-17	0.459757	0.646057	0.991314	-4.6232
Subgroup	Fabry Treated Classic Female .vs. Fabry Treated Classic Male	Cytokine	VEGFA	0.144998	-0.481561	0.771557	-3.01939e-16	0.455596	0.649043	0.991314	-4.62333
Subgroup	Fabry Treated Classic Female .vs. Fabry Treated Classic Male	Chemokine	CCL13	0.143962	-0.535333	0.823258	2.176e-16	0.417225	0.676842	0.991314	-4.62448
Subgroup	Fabry Treated Classic Female .vs. Fabry Treated Classic Male	Cytokine	IL16	0.153058	-0.597161	0.903276	-1.96658e-16	0.40165	0.688256	0.991314	-4.62491
Subgroup	Fabry Treated Classic Female .vs. Fabry Treated Classic Male	Vascular_Injury	SAA1	-0.156812	-0.971146	0.657522	-6.15722e-17	-0.379102	0.704907	0.991314	-4.62551
Subgroup	Fabry Treated Classic Female .vs. Fabry Treated Classic Male	Angiogenesis	VEGFD	-0.115165	-0.821062	0.590732	-4.7955e-16	-0.321187	0.748314	0.991314	-4.6269
Subgroup	Fabry Treated Classic Female .vs. Fabry Treated Classic Male	Cytokine	LTA	0.118817	-0.685898	0.923531	-4.4859e-17	0.290681	0.771517	0.991314	-4.62754
Subgroup	Fabry Treated Classic Female .vs. Fabry Treated Classic Male	Proinflammatory	IL12B	0.102006	-0.713836	0.917848	-7.01309e-17	0.246149	0.805752	0.991314	-4.62836
Subgroup	Fabry Treated Classic Female .vs. Fabry Treated Classic Male	Proinflammatory	IL1B	0.0899974	-0.68753	0.867525	-5.53509e-17	0.227874	0.819915	0.991314	-4.62865
Subgroup	Fabry Treated Classic Female .vs. Fabry Treated Classic Male	Proinflammatory	IL6	0.0810773	-0.720272	0.882427	6.72571e-17	0.199185	0.842266	0.991314	-4.62907
Subgroup	Fabry Treated Classic Female .vs. Fabry Treated Classic Male	Angiogenesis	TEK	0.05673	-0.720254	0.833714	-1.07048e-15	0.143741	0.885811	0.991314	-4.62972
Subgroup	Fabry Treated Classic Female .vs. Fabry Treated Classic Male	Chemokine	CCL4	0.0495897	-0.656456	0.755636	1.92519e-16	0.138273	0.890126	0.991314	-4.62977
Subgroup	Fabry Treated Classic Female .vs. Fabry Treated Classic Male	Proinflammatory	CXCL8	0.0504832	-0.710575	0.811542	-8.03825e-17	0.13059	0.896196	0.991314	-4.62984
Subgroup	Fabry Treated Classic Female .vs. Fabry Treated Classic Male	Angiogenesis	FGF2	0.0340839	-0.528037	0.596205	-1.04703e-16	0.119371	0.905069	0.991314	-4.62994
Subgroup	Fabry Treated Classic Female .vs. Fabry Treated Classic Male	Chemokine	CCL2	-0.0394036	-0.833671	0.754863	9.81477e-17	-0.0976675	0.922268	0.991314	-4.6301
Subgroup	Fabry Treated Classic Female .vs. Fabry Treated Classic Male	Chemokine	CCL11	0.034478	-0.713079	0.782035	-1.9415e-16	0.0907983	0.92772	0.991314	-4.63015
Subgroup	Fabry Treated Classic Female .vs. Fabry Treated Classic Male	Vascular_Injury	VCAM1	0.0177679	-0.777667	0.813203	-2.33831e-16	0.0439755	0.964956	0.991314	-4.63036
Subgroup	Fabry Treated Classic Female .vs. Fabry Treated Classic Male	Cytokine	IL7	0.00922829	-0.546119	0.564576	5.35605e-17	0.0327142	0.973926	0.991314	-4.63039
Subgroup	Fabry Treated Classic Female .vs. Fabry Treated Classic Male	Chemokine	CCL22	0.00733486	-0.743296	0.757966	2.74249e-16	0.0192374	0.984666	0.991314	-4.63042
Subgroup	Fabry Treated Classic Female .vs. Fabry Treated Classic Male	Chemokine	CCL3	0.00419989	-0.75458	0.76298	-1.52535e-16	0.0108969	0.991314	0.991314	-4.63042
Subgroup	Fabry Treated Classic Female .vs. Fabry Treated Non Classic Female	Angiogenesis	VEGFC	-0.551277	-1.27383	0.171274	7.61746e-17	-1.50204	0.134244	0.986829	-4.56631
Subgroup	Fabry Treated Classic Female .vs. Fabry Treated Non Classic Female	Proinflammatory	IL13	0.68852	-0.271537	1.64858	5.51698e-17	1.41189	0.159124	0.986829	-4.57243
Subgroup	Fabry Treated Classic Female .vs. Fabry Treated Non Classic Female	Cytokine	IL12A	0.56282	-0.379183	1.50482	-4.08231e-16	1.17624	0.240523	0.986829	-4.58669
Subgroup	Fabry Treated Classic Female .vs. Fabry Treated Non Classic Female	Chemokine	CCL26	-0.465898	-1.35478	0.422989	-1.51081e-16	-1.03187	0.303048	0.986829	-4.59417
Subgroup	Fabry Treated Classic Female .vs. Fabry Treated Non Classic Female	Angiogenesis	PGF	-0.437541	-1.30667	0.431588	-4.4101e-16	-0.991094	0.322519	0.986829	-4.59611
Subgroup	Fabry Treated Classic Female .vs. Fabry Treated Non Classic Female	Vascular_Injury	ICAM1	-0.479835	-1.43426	0.474589	7.19539e-16	-0.989762	0.323168	0.986829	-4.59617
Subgroup	Fabry Treated Classic Female .vs. Fabry Treated Non Classic Female	Proinflammatory	IL10	0.374182	-0.534202	1.28257	1.23542e-16	0.81095	0.418102	0.986829	-4.60375
Subgroup	Fabry Treated Classic Female .vs. Fabry Treated Non Classic Female	Cytokine	VEGFA	0.268837	-0.492957	1.03063	-3.01939e-16	0.694755	0.4878	0.986829	-4.60787
Subgroup	Fabry Treated Classic Female .vs. Fabry Treated Non Classic Female	Vascular_Injury	CRP	-0.328724	-1.31843	0.660987	4.17455e-16	-0.653888	0.513735	0.986829	-4.60917
Subgroup	Fabry Treated Classic Female .vs. Fabry Treated Non Classic Female	Angiogenesis	VEGFD	-0.219912	-1.07817	0.638344	-4.7955e-16	-0.504442	0.614358	0.986829	-4.61326
Subgroup	Fabry Treated Classic Female .vs. Fabry Treated Non Classic Female	Cytokine	LTA	0.246317	-0.732085	1.22472	-4.4859e-17	0.49563	0.620555	0.986829	-4.61347
Subgroup	Fabry Treated Classic Female .vs. Fabry Treated Non Classic Female	Angiogenesis	FLT1	-0.236045	-1.19218	0.72009	8.86632e-16	-0.486022	0.627342	0.986829	-4.61369
Subgroup	Fabry Treated Classic Female .vs. Fabry Treated Non Classic Female	Cytokine	IL17A	0.199679	-0.726223	1.12558	-8.10374e-17	0.424569	0.671486	0.986829	-4.61501
Subgroup	Fabry Treated Classic Female .vs. Fabry Treated Non Classic Female	Chemokine	CCL13	0.164566	-0.661347	0.99048	2.176e-16	0.392272	0.695164	0.986829	-4.61564
Subgroup	Fabry Treated Classic Female .vs. Fabry Treated Non Classic Female	Proinflammatory	IL2	0.17983	-0.807587	1.16725	1.79185e-17	0.358543	0.720214	0.986829	-4.61623
Subgroup	Fabry Treated Classic Female .vs. Fabry Treated Non Classic Female	Cytokine	IL5	0.162614	-0.733226	1.05845	-5.61382e-17	0.357362	0.721097	0.986829	-4.61625
Subgroup	Fabry Treated Classic Female .vs. Fabry Treated Non Classic Female	Proinflammatory	IL6	-0.174331	-1.14864	0.79998	6.72571e-17	-0.352256	0.724919	0.986829	-4.61634
Subgroup	Fabry Treated Classic Female .vs. Fabry Treated Non Classic Female	Proinflammatory	CXCL8	-0.157492	-1.08282	0.767831	-8.03825e-17	-0.335078	0.737824	0.986829	-4.61662
Subgroup	Fabry Treated Classic Female .vs. Fabry Treated Non Classic Female	Vascular_Injury	VCAM1	-0.139499	-1.10662	0.827621	-2.33831e-16	-0.283969	0.77665	0.986829	-4.61737
Subgroup	Fabry Treated Classic Female .vs. Fabry Treated Non Classic Female	Chemokine	CXCL8	-0.106554	-1.01132	0.798208	-1.07009e-17	-0.231855	0.816825	0.986829	-4.618
Subgroup	Fabry Treated Classic Female .vs. Fabry Treated Non Classic Female	Chemokine	CCL22	-0.0972833	-1.00993	0.815362	2.74249e-16	-0.209854	0.833939	0.986829	-4.61823
Subgroup	Fabry Treated Classic Female .vs. Fabry Treated Non Classic Female	Cytokine	IL15	0.100134	-0.850674	1.05094	1.55164e-16	0.207333	0.835904	0.986829	-4.61826
Subgroup	Fabry Treated Classic Female .vs. Fabry Treated Non Classic Female	Vascular_Injury	SAA1	-0.0995875	-1.08969	0.89051	-6.15722e-17	-0.198019	0.843178	0.986829	-4.61835
Subgroup	Fabry Treated Classic Female .vs. Fabry Treated Non Classic Female	Proinflammatory	IL12B	-0.0952848	-1.08722	0.896647	-7.01309e-17	-0.189113	0.850145	0.986829	-4.61843
Subgroup	Fabry Treated Classic Female .vs. Fabry Treated Non Classic Female	Cytokine	IL1A	0.0751799	-0.72746	0.87782	-6.50974e-17	0.1844	0.853837	0.986829	-4.61847
Subgroup	Fabry Treated Classic Female .vs. Fabry Treated Non Classic Female	Chemokine	CCL11	-0.0574795	-0.966387	0.851428	-1.9415e-16	-0.124501	0.90101	0.986829	-4.61891
Subgroup	Fabry Treated Classic Female .vs. Fabry Treated Non Classic Female	Chemokine	CCL2	-0.0499917	-1.01569	0.915708	9.81477e-17	-0.101914	0.918899	0.986829	-4.61903
Subgroup	Fabry Treated Classic Female .vs. Fabry Treated Non Classic Female	Angiogenesis	TEK	0.047222	-0.897465	0.991909	-1.07048e-15	0.0984094	0.92168	0.986829	-4.61905
Subgroup	Fabry Treated Classic Female .vs. Fabry Treated Non Classic Female	Chemokine	CCL4	0.0424118	-0.816025	0.900849	1.92519e-16	0.0972655	0.922587	0.986829	-4.61905
Subgroup	Fabry Treated Classic Female .vs. Fabry Treated Non Classic Female	Proinflammatory	IL1B	0.0464365	-0.898911	0.991784	-5.53509e-17	0.096705	0.923032	0.986829	-4.61905
Subgroup	Fabry Treated Classic Female .vs. Fabry Treated Non Classic Female	Chemokine	CXCL10	0.0451586	-0.892215	0.982532	-2.7339e-16	0.0948436	0.924509	0.986829	-4.61906
Subgroup	Fabry Treated Classic Female .vs. Fabry Treated Non Classic Female	Angiogenesis	FGF2	0.0329136	-0.650535	0.716362	-1.04703e-16	0.094809	0.924536	0.986829	-4.61906
Subgroup	Fabry Treated Classic Female .vs. Fabry Treated Non Classic Female	Cytokine	IL16	0.0420128	-0.870131	0.954156	-1.96658e-16	0.0906774	0.927815	0.986829	-4.61908
Subgroup	Fabry Treated Classic Female .vs. Fabry Treated Non Classic Female	Cytokine	IL7	0.0265378	-0.648675	0.70175	5.35605e-17	0.0773757	0.938381	0.986829	-4.61913
Subgroup	Fabry Treated Classic Female .vs. Fabry Treated Non Classic Female	Proinflammatory	IFNG	0.0348284	-0.873794	0.94345	-5.48354e-17	0.0754625	0.939902	0.986829	-4.61914
Subgroup	Fabry Treated Classic Female .vs. Fabry Treated Non Classic Female	Cytokine	CSF2	0.0314941	-0.890888	0.953876	4.12432e-17	0.0672201	0.946456	0.986829	-4.61917
Subgroup	Fabry Treated Classic Female .vs. Fabry Treated Non Classic Female	Proinflammatory	TNF	0.0153228	-0.89293	0.923575	-1.54599e-16	0.0332132	0.973529	0.986829	-4.61925
Subgroup	Fabry Treated Classic Female .vs. Fabry Treated Non Classic Female	Proinflammatory	IL4	0.0098148	-0.964552	0.984182	4.74018e-17	0.0198307	0.984193	0.986829	-4.61927
Subgroup	Fabry Treated Classic Female .vs. Fabry Treated Non Classic Female	Chemokine	CCL3	-0.00832143	-0.930874	0.914231	-1.52535e-16	-0.0177577	0.985845	0.986829	-4.61927
Subgroup	Fabry Treated Classic Female .vs. Fabry Treated Non Classic Female	Chemokine	CCL17	-0.00708553	-0.851335	0.837164	-1.00753e-16	-0.0165227	0.986829	0.986829	-4.61927
Subgroup	Fabry Treated Classic Female .vs. Fabry Treated Non Classic Male	Cytokine	IL17A	0.55744	-0.148506	1.26339	-8.10374e-17	1.55456	0.121211	0.977829	-4.54162
Subgroup	Fabry Treated Classic Female .vs. Fabry Treated Non Classic Male	Proinflammatory	IL13	0.433534	-0.298452	1.16552	5.51698e-17	1.16601	0.244631	0.977829	-4.5827
Subgroup	Fabry Treated Classic Female .vs. Fabry Treated Non Classic Male	Chemokine	CXCL8	0.343912	-0.345915	1.03374	-1.07009e-17	0.981493	0.32722	0.977829	-4.59817
Subgroup	Fabry Treated Classic Female .vs. Fabry Treated Non Classic Male	Cytokine	IL12A	0.34943	-0.368791	1.06765	-4.08231e-16	0.957817	0.339004	0.977829	-4.59997
Subgroup	Fabry Treated Classic Female .vs. Fabry Treated Non Classic Male	Angiogenesis	VEGFD	-0.306938	-0.961307	0.347431	-4.7955e-16	-0.92344	0.356595	0.977829	-4.6025
Subgroup	Fabry Treated Classic Female .vs. Fabry Treated Non Classic Male	Vascular_Injury	SAA1	-0.342436	-1.09733	0.412454	-6.15722e-17	-0.893051	0.372617	0.977829	-4.60466
Subgroup	Fabry Treated Classic Female .vs. Fabry Treated Non Classic Male	Angiogenesis	PGF	-0.293174	-0.955833	0.369484	-4.4101e-16	-0.870996	0.384523	0.977829	-4.60618
Subgroup	Fabry Treated Classic Female .vs. Fabry Treated Non Classic Male	Cytokine	IL1A	-0.258498	-0.870463	0.353467	-6.50974e-17	-0.831593	0.406367	0.977829	-4.60881
Subgroup	Fabry Treated Classic Female .vs. Fabry Treated Non Classic Male	Proinflammatory	CXCL8	-0.218652	-0.924155	0.486852	-8.03825e-17	-0.610146	0.542273	0.977829	-4.62134
Subgroup	Fabry Treated Classic Female .vs. Fabry Treated Non Classic Male	Vascular_Injury	CRP	0.218874	-0.535721	0.973469	4.17455e-16	0.571032	0.568448	0.977829	-4.62315
Subgroup	Fabry Treated Classic Female .vs. Fabry Treated Non Classic Male	Chemokine	CCL3	0.199526	-0.503865	0.902917	-1.52535e-16	0.558448	0.576997	0.977829	-4.62371
Subgroup	Fabry Treated Classic Female .vs. Fabry Treated Non Classic Male	Cytokine	VEGFA	0.159007	-0.421815	0.739829	-3.01939e-16	0.538956	0.590357	0.977829	-4.62455
Subgroup	Fabry Treated Classic Female .vs. Fabry Treated Non Classic Male	Cytokine	IL16	0.189629	-0.505826	0.885083	-1.96658e-16	0.536803	0.591841	0.977829	-4.62464
Subgroup	Fabry Treated Classic Female .vs. Fabry Treated Non Classic Male	Cytokine	IL5	0.182672	-0.500352	0.865697	-5.61382e-17	0.526523	0.598953	0.977829	-4.62507
Subgroup	Fabry Treated Classic Female .vs. Fabry Treated Non Classic Male	Proinflammatory	IL12B	-0.201546	-0.957835	0.554742	-7.01309e-17	-0.524647	0.600255	0.977829	-4.62515
Subgroup	Fabry Treated Classic Female .vs. Fabry Treated Non Classic Male	Chemokine	CCL26	-0.177858	-0.855581	0.499865	-1.51081e-16	-0.516657	0.605814	0.977829	-4.62548
Subgroup	Fabry Treated Classic Female .vs. Fabry Treated Non Classic Male	Proinflammatory	IL6	-0.175734	-0.918588	0.56712	6.72571e-17	-0.465729	0.641782	0.977829	-4.62744
Subgroup	Fabry Treated Classic Female .vs. Fabry Treated Non Classic Male	Cytokine	LTA	0.156324	-0.589649	0.902297	-4.4859e-17	0.412557	0.680255	0.977829	-4.62928
Subgroup	Fabry Treated Classic Female .vs. Fabry Treated Non Classic Male	Chemokine	CCL17	0.130676	-0.513014	0.774365	-1.00753e-16	0.399668	0.689714	0.977829	-4.62969
Subgroup	Fabry Treated Classic Female .vs. Fabry Treated Non Classic Male	Proinflammatory	IL10	0.123454	-0.569135	0.816043	1.23542e-16	0.350921	0.725918	0.977829	-4.63113
Subgroup	Fabry Treated Classic Female .vs. Fabry Treated Non Classic Male	Proinflammatory	IFNG	-0.12082	-0.81359	0.57195	-5.48354e-17	-0.343344	0.731604	0.977829	-4.63134
Subgroup	Fabry Treated Classic Female .vs. Fabry Treated Non Classic Male	Chemokine	CXCL10	0.10772	-0.606971	0.822411	-2.7339e-16	0.296728	0.7669	0.977829	-4.63251
Subgroup	Fabry Treated Classic Female .vs. Fabry Treated Non Classic Male	Chemokine	CCL13	0.090171	-0.539538	0.71988	2.176e-16	0.281908	0.778228	0.977829	-4.63285
Subgroup	Fabry Treated Classic Female .vs. Fabry Treated Non Classic Male	Proinflammatory	IL4	0.0894866	-0.65341	0.832383	4.74018e-17	0.237143	0.812724	0.977829	-4.63376
Subgroup	Fabry Treated Classic Female .vs. Fabry Treated Non Classic Male	Cytokine	CSF2	-0.0803462	-0.783607	0.622915	4.12432e-17	-0.224921	0.82221	0.977829	-4.63399
Subgroup	Fabry Treated Classic Female .vs. Fabry Treated Non Classic Male	Chemokine	CCL4	-0.0720235	-0.72653	0.582483	1.92519e-16	-0.216641	0.82865	0.977829	-4.63413
Subgroup	Fabry Treated Classic Female .vs. Fabry Treated Non Classic Male	Angiogenesis	TEK	-0.0762414	-0.796508	0.644026	-1.07048e-15	-0.20839	0.83508	0.977829	-4.63427
Subgroup	Fabry Treated Classic Female .vs. Fabry Treated Non Classic Male	Proinflammatory	IL2	-0.0704195	-0.823266	0.682427	1.79185e-17	-0.184148	0.854034	0.977829	-4.63464
Subgroup	Fabry Treated Classic Female .vs. Fabry Treated Non Classic Male	Chemokine	CCL22	-0.0637207	-0.759558	0.632117	2.74249e-16	-0.180282	0.857065	0.977829	-4.6347
Subgroup	Fabry Treated Classic Female .vs. Fabry Treated Non Classic Male	Proinflammatory	TNF	0.0615153	-0.630973	0.754004	-1.54599e-16	0.174885	0.8613	0.977829	-4.63477
Subgroup	Fabry Treated Classic Female .vs. Fabry Treated Non Classic Male	Chemokine	CCL11	-0.0527466	-0.745734	0.640241	-1.9415e-16	-0.149847	0.880996	0.977829	-4.63509
Subgroup	Fabry Treated Classic Female .vs. Fabry Treated Non Classic Male	Cytokine	IL7	-0.035154	-0.549963	0.479655	5.35605e-17	-0.134434	0.893159	0.977829	-4.63527
Subgroup	Fabry Treated Classic Female .vs. Fabry Treated Non Classic Male	Proinflammatory	IL1B	0.0409283	-0.679842	0.761699	-5.53509e-17	0.111791	0.911071	0.977829	-4.63549
Subgroup	Fabry Treated Classic Female .vs. Fabry Treated Non Classic Male	Chemokine	CCL2	-0.0324394	-0.768728	0.703849	9.81477e-17	-0.0867372	0.930944	0.977829	-4.63568
Subgroup	Fabry Treated Classic Female .vs. Fabry Treated Non Classic Male	Vascular_Injury	ICAM1	-0.0316891	-0.75938	0.696002	7.19539e-16	-0.0857322	0.931742	0.977829	-4.63569
Subgroup	Fabry Treated Classic Female .vs. Fabry Treated Non Classic Male	Cytokine	IL15	-0.0312517	-0.756186	0.693683	1.55164e-16	-0.0848702	0.932427	0.977829	-4.63569
Subgroup	Fabry Treated Classic Female .vs. Fabry Treated Non Classic Male	Angiogenesis	VEGFC	-0.0199197	-0.570822	0.530982	7.61746e-17	-0.0711852	0.943303	0.977829	-4.63578
Subgroup	Fabry Treated Classic Female .vs. Fabry Treated Non Classic Male	Angiogenesis	FGF2	0.0146848	-0.506404	0.535773	-1.04703e-16	0.0554802	0.955797	0.977829	-4.63586
Subgroup	Fabry Treated Classic Female .vs. Fabry Treated Non Classic Male	Angiogenesis	FLT1	-0.0157388	-0.744734	0.713257	8.86632e-16	-0.0425038	0.966128	0.977829	-4.63591
Subgroup	Fabry Treated Classic Female .vs. Fabry Treated Non Classic Male	Vascular_Injury	VCAM1	-0.0104184	-0.747789	0.726952	-2.33831e-16	-0.0278161	0.977829	0.977829	-4.63595
Subgroup	Fabry Treated Classic Male .vs. Fabry Treated Non Classic Female	Vascular_Injury	ICAM1	-0.868551	-1.80883	0.0717322	7.19539e-16	-1.81852	0.0700826	0.997272	-4.5404
Subgroup	Fabry Treated Classic Male .vs. Fabry Treated Non Classic Female	Vascular_Injury	CRP	-0.770691	-1.74574	0.204357	4.17455e-16	-1.55609	0.120847	0.997272	-4.56153
Subgroup	Fabry Treated Classic Male .vs. Fabry Treated Non Classic Female	Cytokine	IL1A	0.576711	-0.214037	1.36746	-6.50974e-17	1.43582	0.1522	0.997272	-4.57016
Subgroup	Fabry Treated Classic Male .vs. Fabry Treated Non Classic Female	Chemokine	CXCL8	-0.557128	-1.44849	0.33423	-1.07009e-17	-1.23051	0.219569	0.997272	-4.58332
Subgroup	Fabry Treated Classic Male .vs. Fabry Treated Non Classic Female	Proinflammatory	IFNG	-0.463145	-1.3583	0.432016	-5.48354e-17	-1.01858	0.309304	0.997272	-4.59482
Subgroup	Fabry Treated Classic Male .vs. Fabry Treated Non Classic Female	Angiogenesis	FLT1	-0.43989	-1.38186	0.502079	8.86632e-16	-0.919364	0.358718	0.997272	-4.59947
Subgroup	Fabry Treated Classic Male .vs. Fabry Treated Non Classic Female	Cytokine	CSF2	0.323564	-0.585152	1.23228	4.12432e-17	0.700991	0.483907	0.997272	-4.60805
Subgroup	Fabry Treated Classic Male .vs. Fabry Treated Non Classic Female	Angiogenesis	VEGFC	-0.24534	-0.957186	0.466506	7.61746e-17	-0.678519	0.498018	0.997272	-4.6088
Subgroup	Fabry Treated Classic Male .vs. Fabry Treated Non Classic Female	Cytokine	IL12A	0.316136	-0.61191	1.24418	-4.08231e-16	0.670632	0.503023	0.997272	-4.60906
Subgroup	Fabry Treated Classic Male .vs. Fabry Treated Non Classic Female	Proinflammatory	IL13	0.311198	-0.634635	1.25703	5.51698e-17	0.647743	0.517696	0.997272	-4.60979
Subgroup	Fabry Treated Classic Male .vs. Fabry Treated Non Classic Female	Chemokine	CCL26	-0.279	-1.15472	0.596717	-1.51081e-16	-0.627221	0.531039	0.997272	-4.61042
Subgroup	Fabry Treated Classic Male .vs. Fabry Treated Non Classic Female	Proinflammatory	IL4	-0.27734	-1.23727	0.682592	4.74018e-17	-0.56879	0.569967	0.997272	-4.61212
Subgroup	Fabry Treated Classic Male .vs. Fabry Treated Non Classic Female	Angiogenesis	PGF	-0.246073	-1.10232	0.61018	-4.4101e-16	-0.565773	0.572014	0.997272	-4.6122
Subgroup	Fabry Treated Classic Male .vs. Fabry Treated Non Classic Female	Proinflammatory	TNF	-0.242769	-1.13757	0.652027	-1.54599e-16	-0.534133	0.593685	0.997272	-4.61305
Subgroup	Fabry Treated Classic Male .vs. Fabry Treated Non Classic Female	Proinflammatory	IL6	-0.255409	-1.21528	0.704467	6.72571e-17	-0.523842	0.600814	0.997272	-4.61331
Subgroup	Fabry Treated Classic Male .vs. Fabry Treated Non Classic Female	Chemokine	CXCL10	-0.240491	-1.16398	0.682995	-2.7339e-16	-0.512683	0.608588	0.997272	-4.6136
Subgroup	Fabry Treated Classic Male .vs. Fabry Treated Non Classic Female	Cytokine	IL5	-0.229351	-1.11192	0.653216	-5.61382e-17	-0.511604	0.609342	0.997272	-4.61362
Subgroup	Fabry Treated Classic Male .vs. Fabry Treated Non Classic Female	Cytokine	IL15	-0.242048	-1.17877	0.694674	1.55164e-16	-0.508711	0.611366	0.997272	-4.61369
Subgroup	Fabry Treated Classic Male .vs. Fabry Treated Non Classic Female	Proinflammatory	CXCL8	-0.207976	-1.11959	0.703639	-8.03825e-17	-0.44914	0.653688	0.997272	-4.61508
Subgroup	Fabry Treated Classic Male .vs. Fabry Treated Non Classic Female	Chemokine	CCL17	-0.184482	-1.01622	0.647259	-1.00753e-16	-0.436663	0.662702	0.997272	-4.61535
Subgroup	Fabry Treated Classic Male .vs. Fabry Treated Non Classic Female	Proinflammatory	IL12B	-0.197291	-1.17453	0.779945	-7.01309e-17	-0.397454	0.691343	0.997272	-4.61615
Subgroup	Fabry Treated Classic Male .vs. Fabry Treated Non Classic Female	Vascular_Injury	VCAM1	-0.157267	-1.11006	0.795524	-2.33831e-16	-0.324952	0.745467	0.997272	-4.61742
Subgroup	Fabry Treated Classic Male .vs. Fabry Treated Non Classic Female	Cytokine	VEGFA	0.123839	-0.626668	0.874347	-3.01939e-16	0.32485	0.745543	0.997272	-4.61742
Subgroup	Fabry Treated Classic Male .vs. Fabry Treated Non Classic Female	Cytokine	IL17A	-0.145076	-1.05726	0.767108	-8.10374e-17	-0.313108	0.754438	0.997272	-4.6176
Subgroup	Fabry Treated Classic Male .vs. Fabry Treated Non Classic Female	Cytokine	LTA	0.1275	-0.836406	1.09141	-4.4859e-17	0.26041	0.794744	0.997272	-4.61834
Subgroup	Fabry Treated Classic Male .vs. Fabry Treated Non Classic Female	Angiogenesis	VEGFD	-0.104747	-0.950287	0.740794	-4.7955e-16	-0.243886	0.807502	0.997272	-4.61854
Subgroup	Fabry Treated Classic Male .vs. Fabry Treated Non Classic Female	Cytokine	IL16	-0.111045	-1.00967	0.787585	-1.96658e-16	-0.243275	0.807975	0.997272	-4.61855
Subgroup	Fabry Treated Classic Male .vs. Fabry Treated Non Classic Female	Chemokine	CCL22	-0.104618	-1.00374	0.794506	2.74249e-16	-0.22907	0.818986	0.997272	-4.61871
Subgroup	Fabry Treated Classic Male .vs. Fabry Treated Non Classic Female	Chemokine	CCL11	-0.0919575	-0.987399	0.803484	-1.9415e-16	-0.202176	0.83993	0.997272	-4.61899
Subgroup	Fabry Treated Classic Male .vs. Fabry Treated Non Classic Female	Vascular_Injury	SAA1	0.0572243	-0.918205	1.03265	-6.15722e-17	0.115496	0.908137	0.997272	-4.61966
Subgroup	Fabry Treated Classic Male .vs. Fabry Treated Non Classic Female	Proinflammatory	IL10	-0.0504931	-0.945419	0.844433	1.23542e-16	-0.111077	0.911637	0.997272	-4.61969
Subgroup	Fabry Treated Classic Male .vs. Fabry Treated Non Classic Female	Proinflammatory	IL1B	-0.0435608	-0.974902	0.88778	-5.53509e-17	-0.0920805	0.926702	0.997272	-4.61978
Subgroup	Fabry Treated Classic Male .vs. Fabry Treated Non Classic Female	Cytokine	IL7	0.0173095	-0.647899	0.682518	5.35605e-17	0.051228	0.959181	0.997272	-4.61993
Subgroup	Fabry Treated Classic Male .vs. Fabry Treated Non Classic Female	Chemokine	CCL13	0.020604	-0.793073	0.834281	2.176e-16	0.0498518	0.960277	0.997272	-4.61993
Subgroup	Fabry Treated Classic Male .vs. Fabry Treated Non Classic Female	Chemokine	CCL3	-0.0125213	-0.921406	0.896363	-1.52535e-16	-0.027122	0.978382	0.997272	-4.61997
Subgroup	Fabry Treated Classic Male .vs. Fabry Treated Non Classic Female	Chemokine	CCL2	-0.010588	-0.96198	0.940804	9.81477e-17	-0.0219096	0.982536	0.997272	-4.61998
Subgroup	Fabry Treated Classic Male .vs. Fabry Treated Non Classic Female	Angiogenesis	TEK	-0.00950807	-0.940199	0.921182	-1.07048e-15	-0.0201126	0.983968	0.997272	-4.61998
Subgroup	Fabry Treated Classic Male .vs. Fabry Treated Non Classic Female	Proinflammatory	IL2	-0.00982906	-0.982617	0.962959	1.79185e-17	-0.0198918	0.984144	0.997272	-4.61998
Subgroup	Fabry Treated Classic Male .vs. Fabry Treated Non Classic Female	Chemokine	CCL4	-0.00717788	-0.852897	0.838541	1.92519e-16	-0.016709	0.986681	0.997272	-4.61998
Subgroup	Fabry Treated Classic Male .vs. Fabry Treated Non Classic Female	Angiogenesis	FGF2	-0.00117038	-0.674493	0.672152	-1.04703e-16	-0.00342203	0.997272	0.997272	-4.61999
Subgroup	Fabry Treated Classic Male .vs. Fabry Treated Non Classic Male	Proinflammatory	IFNG	-0.618793	-1.29381	0.0562239	-5.48354e-17	-1.80473	0.0722211	0.984767	-4.50506
Subgroup	Fabry Treated Classic Male .vs. Fabry Treated Non Classic Male	Vascular_Injury	ICAM1	-0.420406	-1.12945	0.288637	7.19539e-16	-1.16728	0.244116	0.984767	-4.58206
Subgroup	Fabry Treated Classic Male .vs. Fabry Treated Non Classic Male	Angiogenesis	VEGFC	0.286018	-0.250767	0.822802	7.61746e-17	1.04899	0.29511	0.984767	-4.59279
Subgroup	Fabry Treated Classic Male .vs. Fabry Treated Non Classic Male	Cytokine	IL15	-0.373433	-1.07979	0.332924	1.55164e-16	-1.0408	0.298888	0.984767	-4.59349
Subgroup	Fabry Treated Classic Male .vs. Fabry Treated Non Classic Male	Proinflammatory	IL10	-0.301222	-0.976062	0.373619	1.23542e-16	-0.87875	0.380311	0.984767	-4.60626
Subgroup	Fabry Treated Classic Male .vs. Fabry Treated Non Classic Male	Proinflammatory	IL12B	-0.303552	-1.04046	0.433356	-7.01309e-17	-0.810961	0.418095	0.984767	-4.61096
Subgroup	Fabry Treated Classic Male .vs. Fabry Treated Non Classic Male	Cytokine	IL1A	0.243033	-0.353249	0.839316	-6.50974e-17	0.802405	0.423017	0.984767	-4.61153
Subgroup	Fabry Treated Classic Male .vs. Fabry Treated Non Classic Male	Proinflammatory	CXCL8	-0.269135	-0.956559	0.41829	-8.03825e-17	-0.770771	0.44151	0.984767	-4.61358
Subgroup	Fabry Treated Classic Male .vs. Fabry Treated Non Classic Male	Proinflammatory	IL6	-0.256811	-0.980629	0.467006	6.72571e-17	-0.698499	0.485461	0.984767	-4.61795
Subgroup	Fabry Treated Classic Male .vs. Fabry Treated Non Classic Male	Proinflammatory	IL2	-0.260079	-0.993633	0.473476	1.79185e-17	-0.697996	0.485775	0.984767	-4.61798
Subgroup	Fabry Treated Classic Male .vs. Fabry Treated Non Classic Male	Cytokine	IL5	-0.209293	-0.874814	0.456228	-5.61382e-17	-0.619118	0.536355	0.984767	-4.62225
Subgroup	Fabry Treated Classic Male .vs. Fabry Treated Non Classic Male	Cytokine	IL17A	0.212684	-0.475171	0.900539	-8.10374e-17	0.608721	0.543216	0.984767	-4.62278
Subgroup	Fabry Treated Classic Male .vs. Fabry Treated Non Classic Male	Angiogenesis	FLT1	-0.219584	-0.929898	0.490731	8.86632e-16	-0.608597	0.543298	0.984767	-4.62279
Subgroup	Fabry Treated Classic Male .vs. Fabry Treated Non Classic Male	Cytokine	CSF2	0.211724	-0.473515	0.896963	4.12432e-17	0.608286	0.543504	0.984767	-4.6228
Subgroup	Fabry Treated Classic Male .vs. Fabry Treated Non Classic Male	Vascular_Injury	CRP	-0.223093	-0.958351	0.512165	4.17455e-16	-0.597346	0.550772	0.984767	-4.62334
Subgroup	Fabry Treated Classic Male .vs. Fabry Treated Non Classic Male	Angiogenesis	VEGFD	-0.191773	-0.829373	0.445827	-4.7955e-16	-0.592134	0.554251	0.984767	-4.6236
Subgroup	Fabry Treated Classic Male .vs. Fabry Treated Non Classic Male	Proinflammatory	TNF	-0.196577	-0.871319	0.478166	-1.54599e-16	-0.573553	0.566743	0.984767	-4.62449
Subgroup	Fabry Treated Classic Male .vs. Fabry Treated Non Classic Male	Chemokine	CCL3	0.195326	-0.49004	0.880692	-1.52535e-16	0.561071	0.57521	0.984767	-4.62508
Subgroup	Fabry Treated Classic Male .vs. Fabry Treated Non Classic Male	Proinflammatory	IL4	-0.197668	-0.921527	0.526191	4.74018e-17	-0.537604	0.591289	0.984767	-4.62614
Subgroup	Fabry Treated Classic Male .vs. Fabry Treated Non Classic Male	Chemokine	CXCL10	-0.177929	-0.874306	0.518447	-2.7339e-16	-0.503019	0.615357	0.984767	-4.62762
Subgroup	Fabry Treated Classic Male .vs. Fabry Treated Non Classic Male	Vascular_Injury	SAA1	-0.185625	-0.92117	0.549921	-6.15722e-17	-0.496828	0.61971	0.984767	-4.62788
Subgroup	Fabry Treated Classic Male .vs. Fabry Treated Non Classic Male	Chemokine	CCL4	-0.121613	-0.759348	0.516121	1.92519e-16	-0.375423	0.707638	0.984767	-4.63225
[truncated: 370 more rows]

## Sheet: Table_S5
name	term	df	sumsq	meansq	statistic	sqrt_omega	p_value	adj_pval
[truncated: 128 more rows]
